# Supplementary material for: Stereoselective Synthesis and Antiproliferative Activities of Tetrafunctional Diterpene Steviol Derivatives
Source: MDPI journal article supplement (doi:10.3390/ijms24021121), 2023-01-06

# Supporting Informations

## Contents

|                                                                                                        |            |
|--------------------------------------------------------------------------------------------------------|------------|
| Investigation of antiproliferative activity of aminotriols                                             | S3         |
| $^1\text{H}$ , $^{13}\text{C}$ , $^{19}\text{F}$ NMR, COSY, NOESY, HSQC, HMBC spectra of new compounds | S4 - 101   |
| HRMS spectra of new compounds                                                                          | S102 - 117 |

**Table S1** *In vitro* antiproliferative activity of the prepared compounds

| Comp. | Conc.<br>( $\mu$ M) | Growth inhibition (%) $\pm$ SEM <sup>1</sup> |                  |                  |                  |                  | NIH/3T3           |
|-------|---------------------|----------------------------------------------|------------------|------------------|------------------|------------------|-------------------|
|       |                     | HeLa                                         | SiHa             | MCF-7            | MDA-MB-231       | A2780            |                   |
| 3     | 10                  | <20 <sup>2</sup>                             | <20              | <20              | <20              | <20              | <20               |
|       | 30                  | 27.92 $\pm$ 2.30                             | 30.73 $\pm$ 2.71 | 49.20 $\pm$ 2.19 | <20              | <20              | <20               |
| 4b    | 10                  | 30.61 $\pm$ 1.09                             | <20              | <20              | <20              | <20              | <20               |
|       | 30                  | 95.35 $\pm$ 0.11                             | 57.98 $\pm$ 2.66 | 53.11 $\pm$ 2.20 | 36.70 $\pm$ 1.62 | 61.99 $\pm$ 0.78 | 37.17 $\pm$ 0.71  |
| 5     | 10                  | <20                                          | <20              | 59.60 $\pm$ 2.73 | 34.59 $\pm$ 2.98 | 30.35 $\pm$ 2.48 | <20               |
|       | 30                  | 95.77 $\pm$ 0.26                             | <20              | 96.42 $\pm$ 0.27 | 95.80 $\pm$ 0.63 | 97.15 $\pm$ 0.21 | 101.1 $\pm$ 0.43  |
| 6     | 10                  | <20                                          | <20              | <20              | <20              | 25.73 $\pm$ 2.70 | <20               |
|       | 30                  | <20                                          | <20              | 51.71 $\pm$ 2.54 | 82.56 $\pm$ 0.69 | 63.73 $\pm$ 1.98 | 89.32 $\pm$ 2.62  |
| 7     | 10                  | 33.68 $\pm$ 0.93                             | <20              | 62.79 $\pm$ 1.05 | 88.05 $\pm$ 0.59 | 52.85 $\pm$ 1.83 | 35.79 $\pm$ 4.12  |
|       | 30                  | 97.76 $\pm$ 0.25                             | 94.56 $\pm$ 0.54 | 97.69 $\pm$ 0.38 | 94.56 $\pm$ 0.63 | 98.14 $\pm$ 0.36 | 100.50 $\pm$ 0.37 |
| 8     | 10                  | <20                                          | <20              | 73.99 $\pm$ 2.14 | 84.31 $\pm$ 2.78 | 59.85 $\pm$ 3.03 | 58.81 $\pm$ 1.41  |
|       | 30                  | 96.19 $\pm$ 0.25                             | 95.09 $\pm$ 0.69 | 96.04 $\pm$ 0.32 | 95.62 $\pm$ 0.92 | 97.45 $\pm$ 0.36 | 103.20 $\pm$ 0.33 |
| 9     | 10                  | 42.54 $\pm$ 1.42                             | 54.60 $\pm$ 3.42 | 96.40 $\pm$ 0.47 | 83.03 $\pm$ 1.71 | 45.60 $\pm$ 3.13 | 25.90 $\pm$ 0.94  |
|       | 30                  | 96.80 $\pm$ 0.74                             | 95.17 $\pm$ 0.37 | 96.19 $\pm$ 0.65 | 93.63 $\pm$ 0.36 | 96.97 $\pm$ 0.29 | 92.44 $\pm$ 1.01  |
| 10    | 10                  | 27.79 $\pm$ 1.05                             | 24.10 $\pm$ 1.39 | 74.32 $\pm$ 2.62 | 37.79 $\pm$ 2.27 | <20              | <20               |
|       | 30                  | 96.06 $\pm$ 0.93                             | 94.64 $\pm$ 0.50 | 95.66 $\pm$ 0.76 | 93.42 $\pm$ 0.56 | 96.79 $\pm$ 0.25 | 90.93 $\pm$ 1.17  |
| 11    | 10                  | 95.41 $\pm$ 1.08                             | 93.66 $\pm$ 0.85 | 96.23 $\pm$ 0.59 | 93.66 $\pm$ 0.59 | 97.06 $\pm$ 0.30 | 44.42 $\pm$ 0.70  |
|       | 30                  | 95.75 $\pm$ 1.11                             | 94.59 $\pm$ 0.49 | 96.27 $\pm$ 0.65 | 94.31 $\pm$ 0.51 | 97.51 $\pm$ 0.22 | 90.55 $\pm$ 1.16  |
| 12    | 10                  | 96.82 $\pm$ 0.56                             | 96.08 $\pm$ 0.60 | 96.35 $\pm$ 0.36 | 95.84 $\pm$ 0.29 | 96.68 $\pm$ 0.36 | 90.07 $\pm$ 0.51  |
|       | 30                  | 96.94 $\pm$ 0.49                             | 95.49 $\pm$ 0.86 | 95.87 $\pm$ 0.38 | 95.62 $\pm$ 0.34 | 96.38 $\pm$ 0.30 | 94.67 $\pm$ 0.24  |
| 13    | 10                  | 94.50 $\pm$ 1.24                             | 93.78 $\pm$ 1.81 | 95.74 $\pm$ 0.64 | 93.33 $\pm$ 0.29 | 96.64 $\pm$ 0.35 | 72.02 $\pm$ 1.81  |
|       | 30                  | 94.91 $\pm$ 1.29                             | 93.77 $\pm$ 0.41 | 95.44 $\pm$ 0.85 | 93.21 $\pm$ 0.46 | 96.79 $\pm$ 0.20 | 90.55 $\pm$ 1.31  |
| 14    | 10                  | 97.20 $\pm$ 0.92                             | 97.24 $\pm$ 0.39 | 97.57 $\pm$ 0.19 | 97.41 $\pm$ 0.21 | 92.19 $\pm$ 3.33 | 93.25 $\pm$ 0.51  |
|       | 30                  | 98.14 $\pm$ 0.36                             | 96.70 $\pm$ 0.65 | 97.66 $\pm$ 0.28 | 96.46 $\pm$ 0.34 | 96.81 $\pm$ 0.23 | 97.34 $\pm$ 0.26  |
| 15    | 10                  | 63.56 $\pm$ 1.54                             | 22.35 $\pm$ 1.42 | 90.95 $\pm$ 1.52 | 68.30 $\pm$ 2.86 | 50.02 $\pm$ 2.99 | 20.97 $\pm$ 0.96  |
|       | 30                  | 97.25 $\pm$ 0.50                             | 95.67 $\pm$ 0.76 | 96.47 $\pm$ 0.26 | 95.63 $\pm$ 0.45 | 96.64 $\pm$ 0.24 | 94.23 $\pm$ 0.31  |
| 16    | 10                  | 53.54 $\pm$ 1.99                             | <20              | 80.66 $\pm$ 2.37 | 39.29 $\pm$ 1.99 | 48.34 $\pm$ 2.17 | <20               |
|       | 30                  | 98.33 $\pm$ 0.32                             | 96.73 $\pm$ 0.65 | 97.10 $\pm$ 0.23 | 96.65 $\pm$ 0.37 | 96.99 $\pm$ 0.19 | 95.12 $\pm$ 0.41  |
| 17    | 10                  | <20                                          | <20              | <20              | <20              | <20              | <20               |
|       | 30                  | 28.87 $\pm$ 2.72                             | <20              | <20              | 30.39 $\pm$ 2.04 | <20              | <20               |
| 18    | 10                  | <20                                          | <20              | <20              | <20              | <20              | <20               |
|       | 30                  | 41.12 $\pm$ 1.95                             | 66.08 $\pm$ 2.45 | 95.18 $\pm$ 0.35 | 87.67 $\pm$ 0.91 | 58.51 $\pm$ 3.18 | <20               |

<sup>1</sup>: Mean  $\pm$  SEM values from two determinations with 5 parallel wells in each.

<sup>2</sup>: Cancer cell growth inhibition values less than 20% were considered negligible and are not given numerically

$^1\text{H}$ -NMR of compound (4*R*,6*aR*,7*R*,9*S*,11*bS*)-methyl 7,9-dihydroxy-4,11*b*-dimethyl-8-methylenetetradecahydro-6*a*,9-methanocyclohepta[*a*]naphthalene-4-carboxylate (**3**)

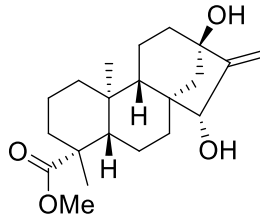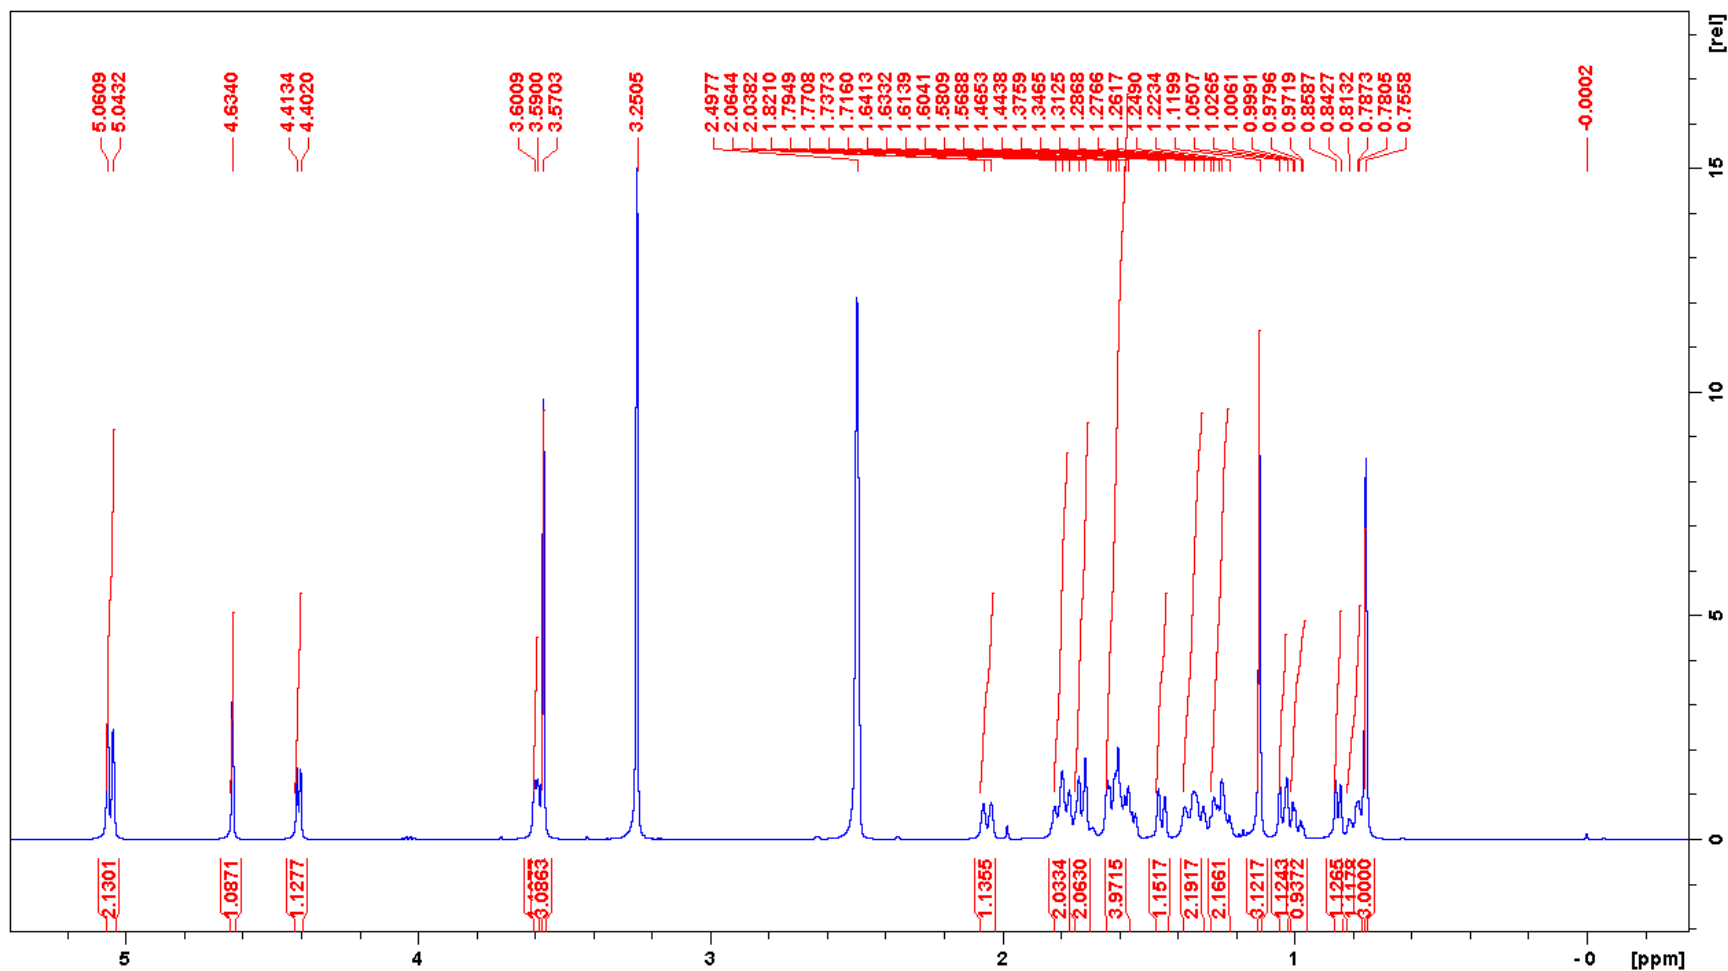

$^{13}\text{C}$ -NMR of compound (4*R*,6*aR*,7*R*,9*S*,11*bS*)-methyl 7,9-dihydroxy-4,11*b*-dimethyl-8-methylenetetradecahydro-6*a*,9-methanocyclohepta[*a*]naphthalene-4-carboxylate (**3**)

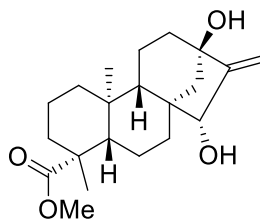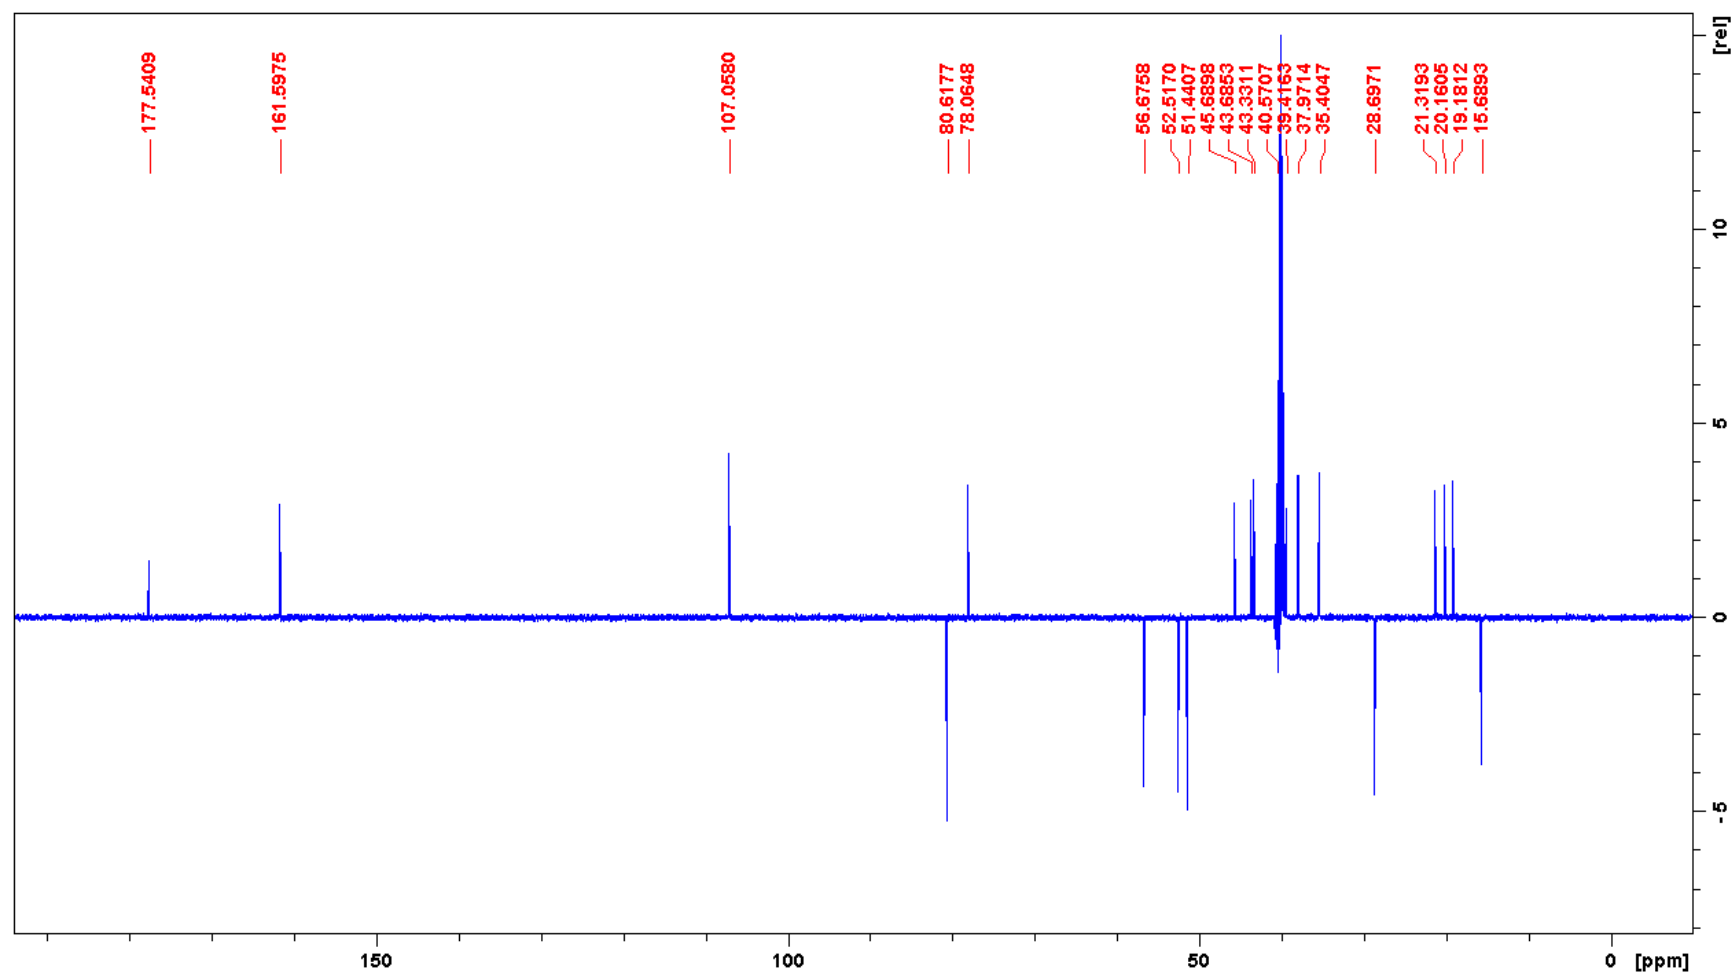

The chemical structure shows a steroid nucleus with a methyl ester group (OMe) at C-3, a double bond at C-5, and hydroxyl groups at C-14 and C-15. The stereochemistry is indicated by wedges and dashes.

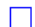

NOESY of compound (4*R*,6*aR*,7*R*,9*S*,11*bS*)-methyl 7,9-dihydroxy-4,11*b*-dimethyl-8-methylenetetradecahydro-6*a*,9-methanocyclohepta[*a*]naphthalene-4-carboxylate (**3**)

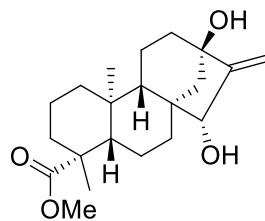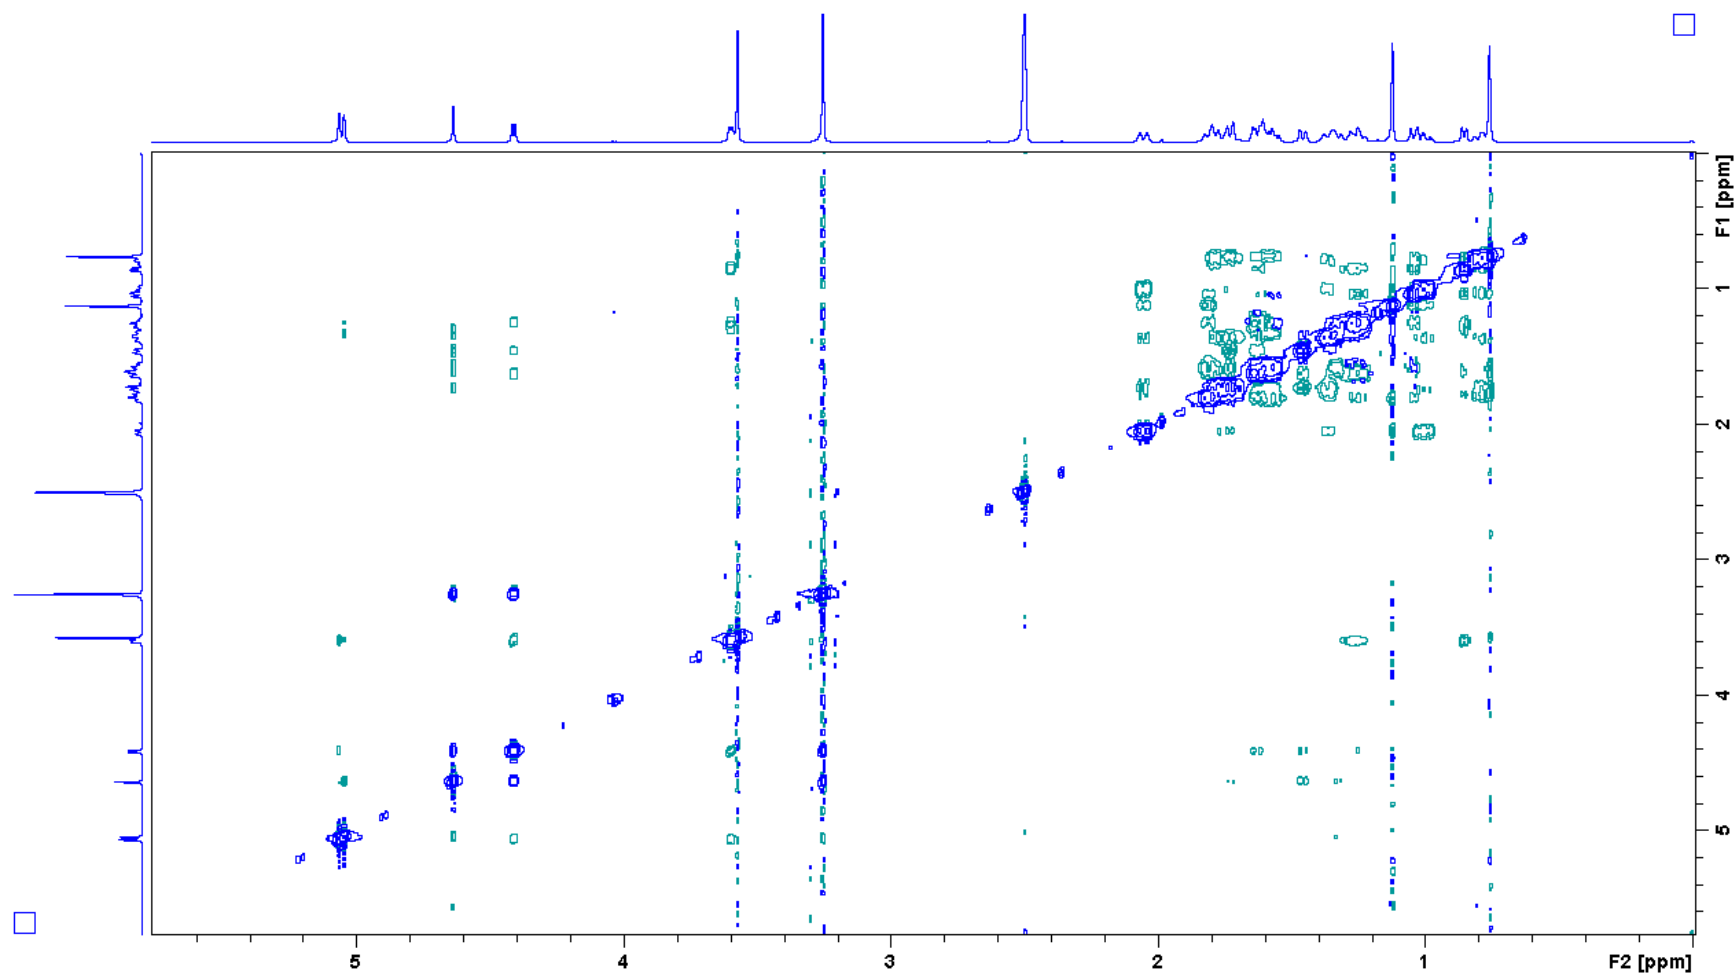

HSQC of compound (4*R*,6*aR*,7*R*,9*S*,11*bS*)-methyl 7,9-dihydroxy-4,11*b*-dimethyl-8-methylenetetradecahydro-6*a*,9-methanocyclohepta[*a*]naphthalene-4-carboxylate (**3**)

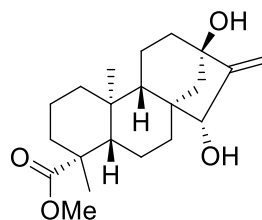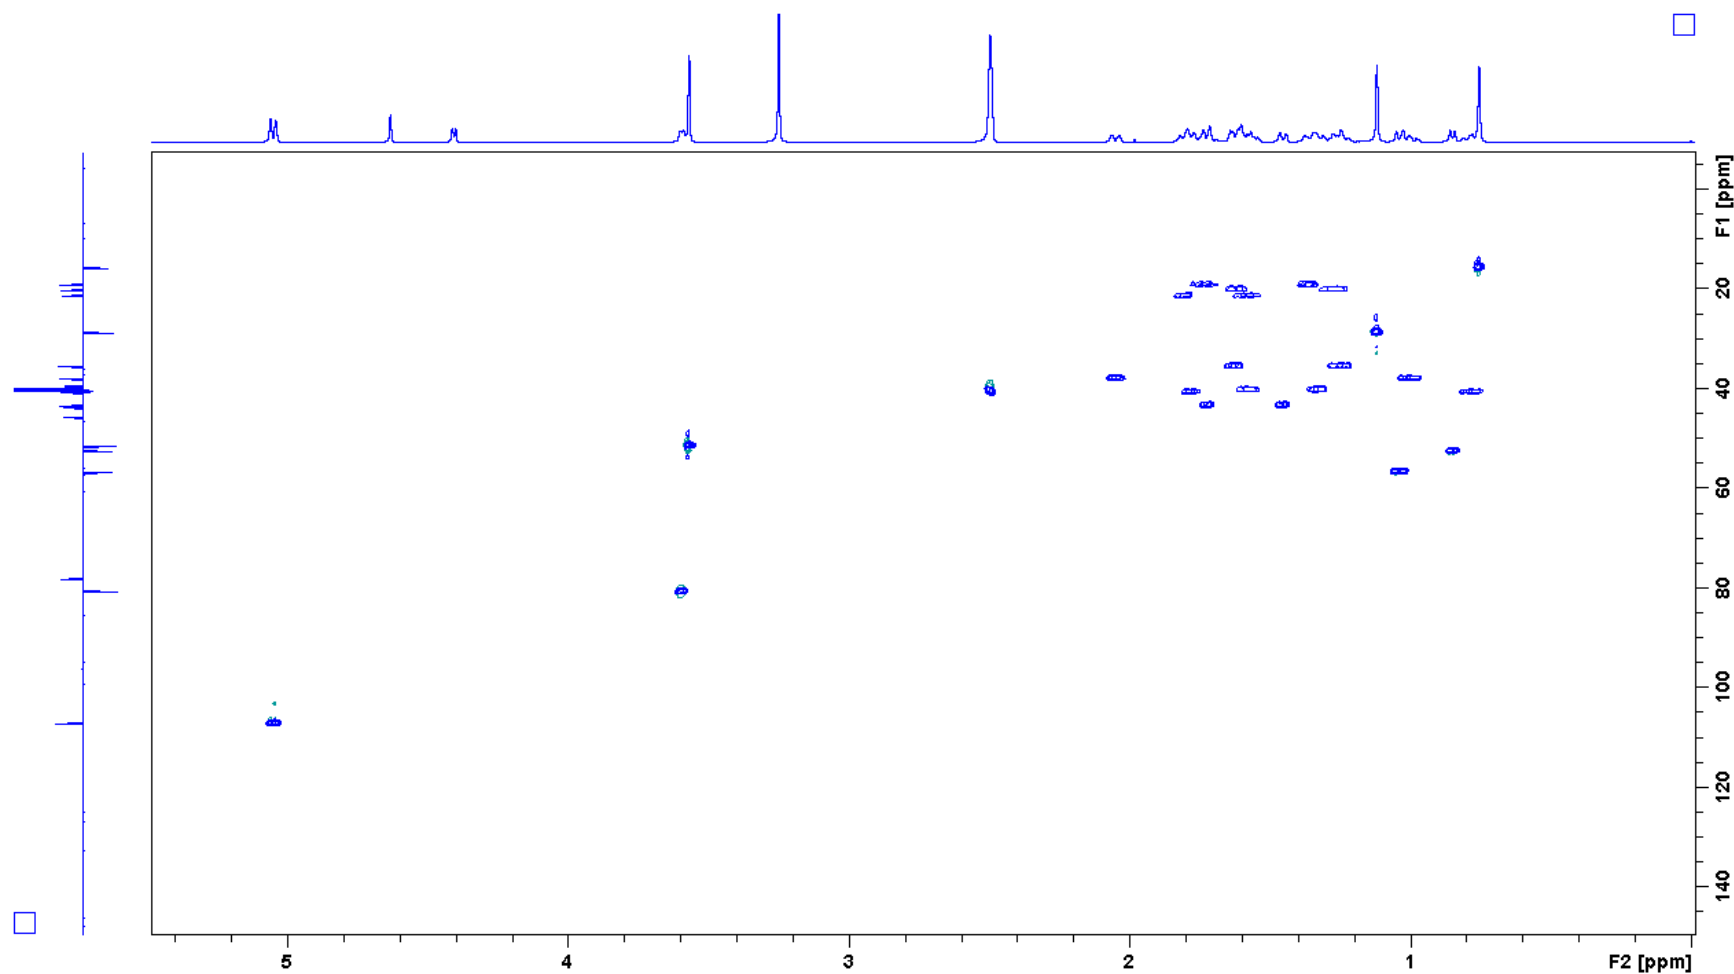



HMBC of compound (4*R*,6*aR*,7*R*,9*S*,11*bS*)-methyl 7,9-dihydroxy-4,11*b*-dimethyl-8-methylenetetradecahydro-6*a*,9-methanocyclohepta[*a*]naphthalene-4-carboxylate (**3**)

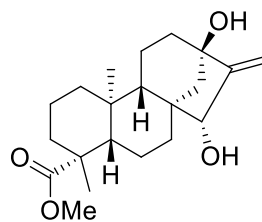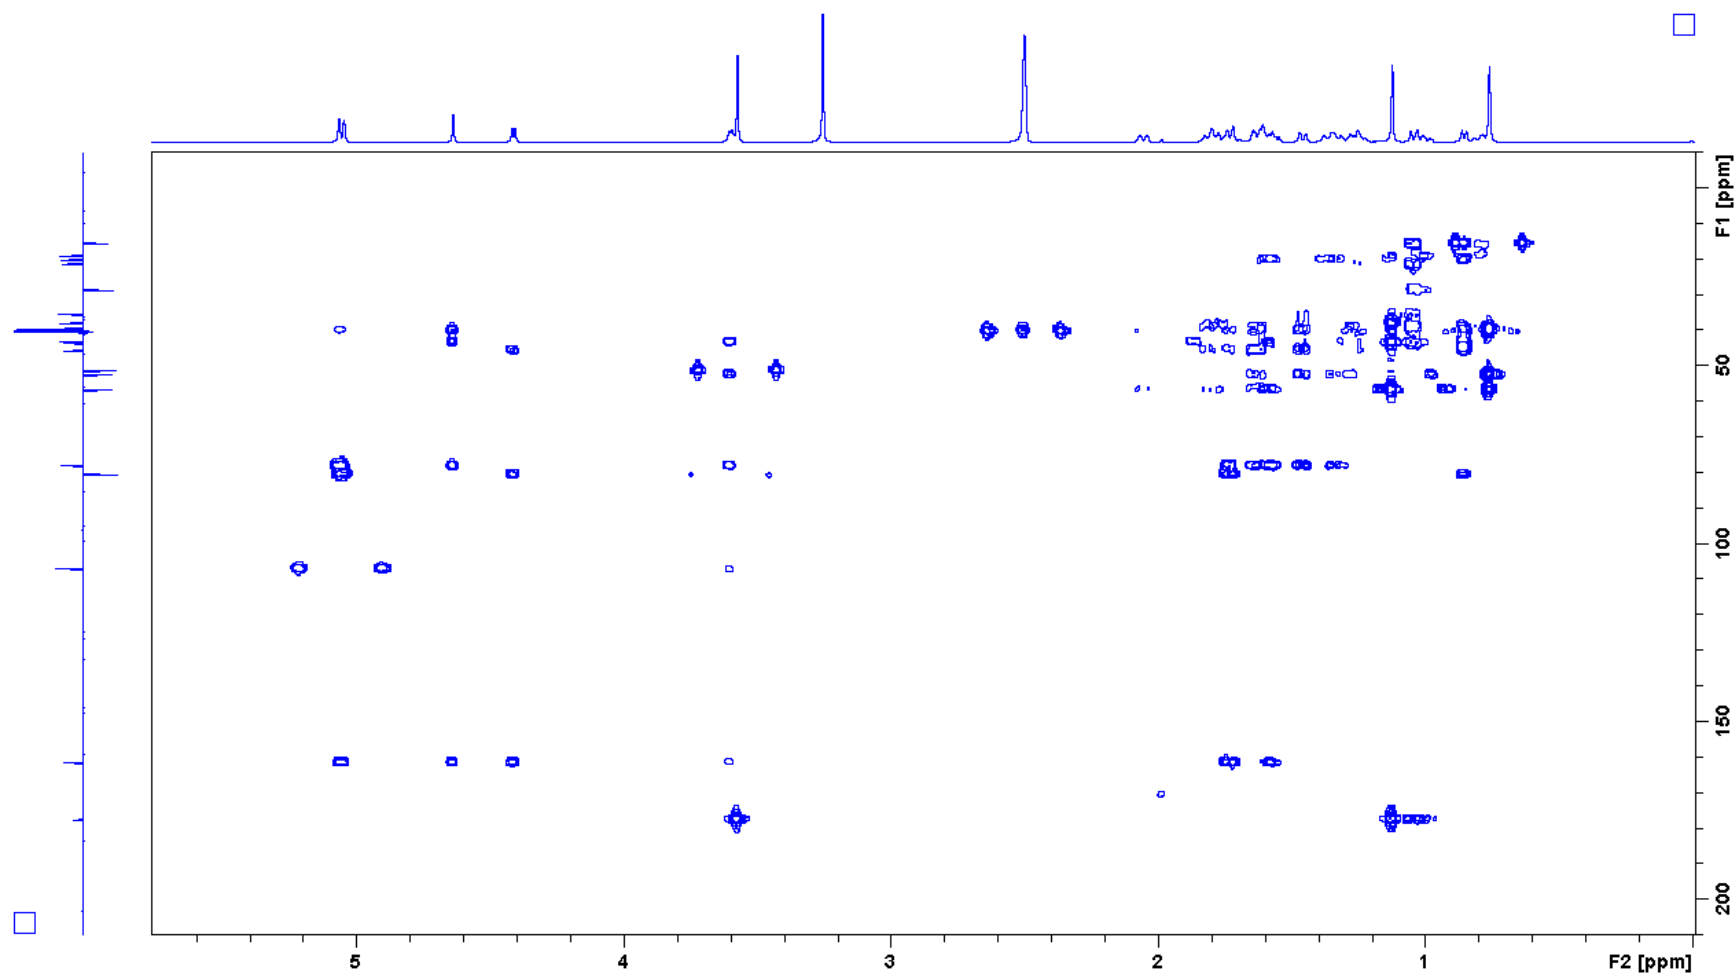

$^1\text{H}$ -NMR of compound (2'*R*,4*R*,6*aR*,7*R*,9*S*,11*bS*)-methyl 7,9-dihydroxy-4,11*b*-dimethyldodecahydro-1*H*-spiro[6*a*,9-methanocyclohepta[*a*]naphthalene-8,2'-oxirane]-4-carboxylate (**4b**)

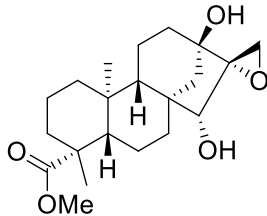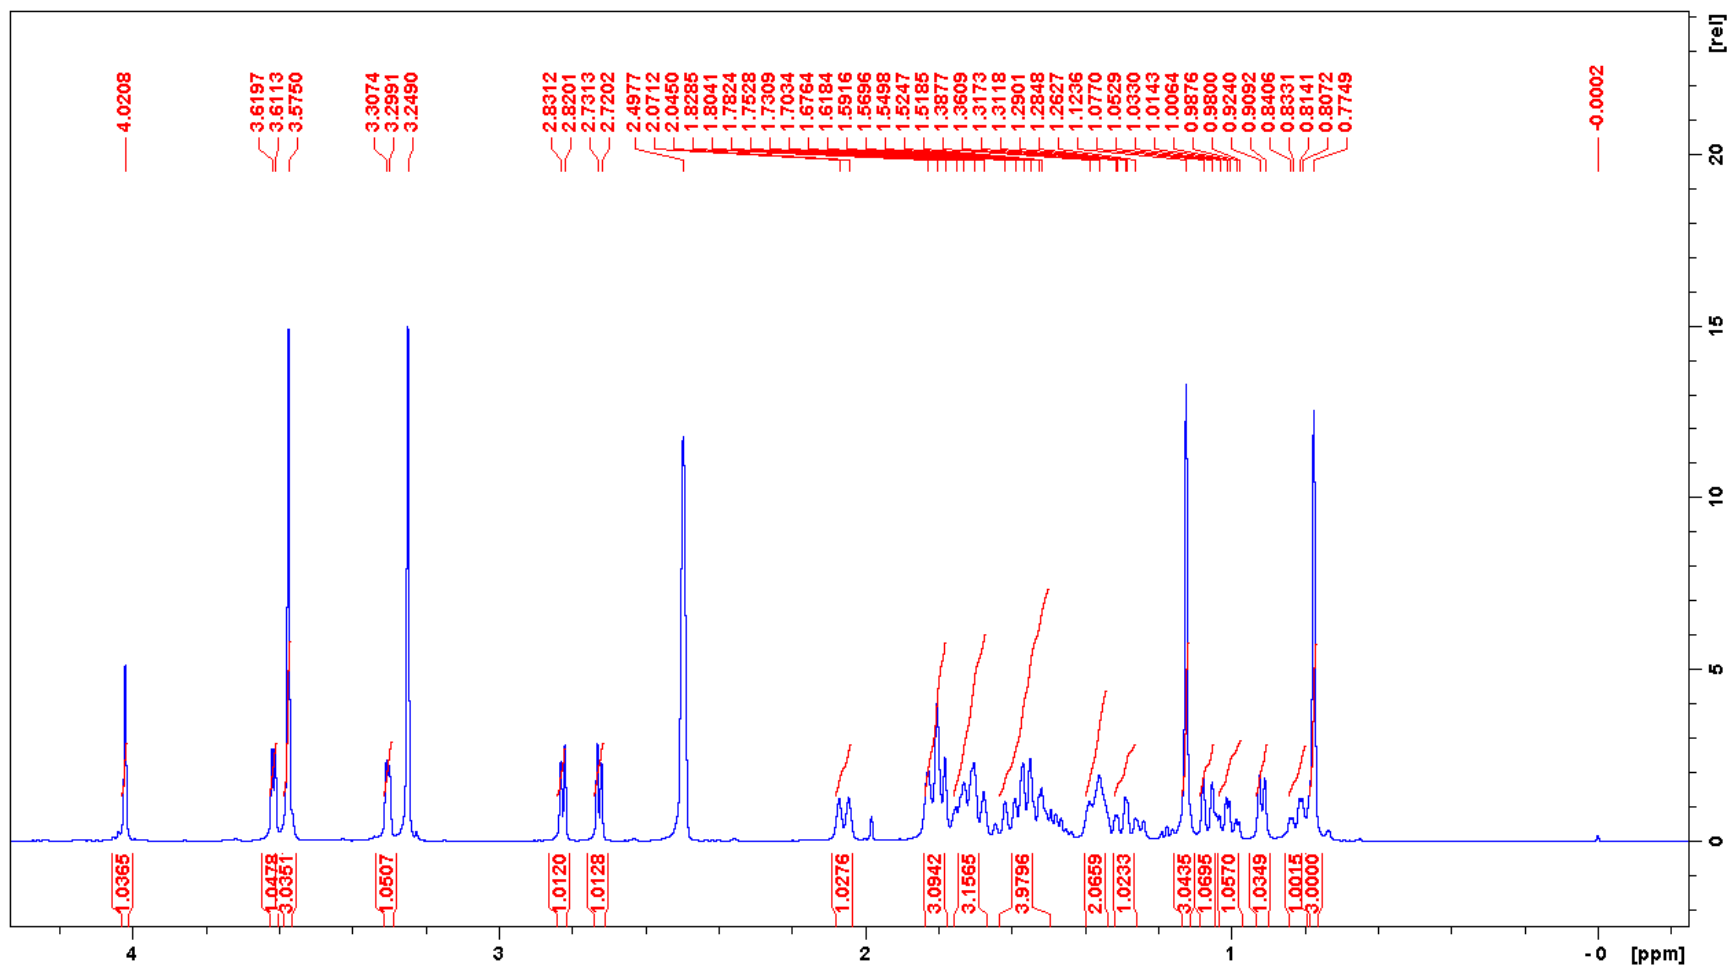

$^{13}\text{C}$ -NMR of compound (2'*R*,4*R*,6*aR*,7*R*,9*S*,11*bS*)-methyl 7,9-dihydroxy-4,11b-dimethyldodecahydro-1*H*-spiro[6*a*,9-methanocyclohepta[*a*]naphthalene-8,2'-oxirane]-4-carboxylate (**4b**)

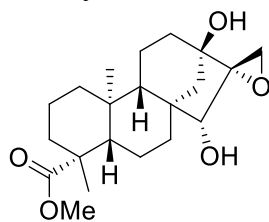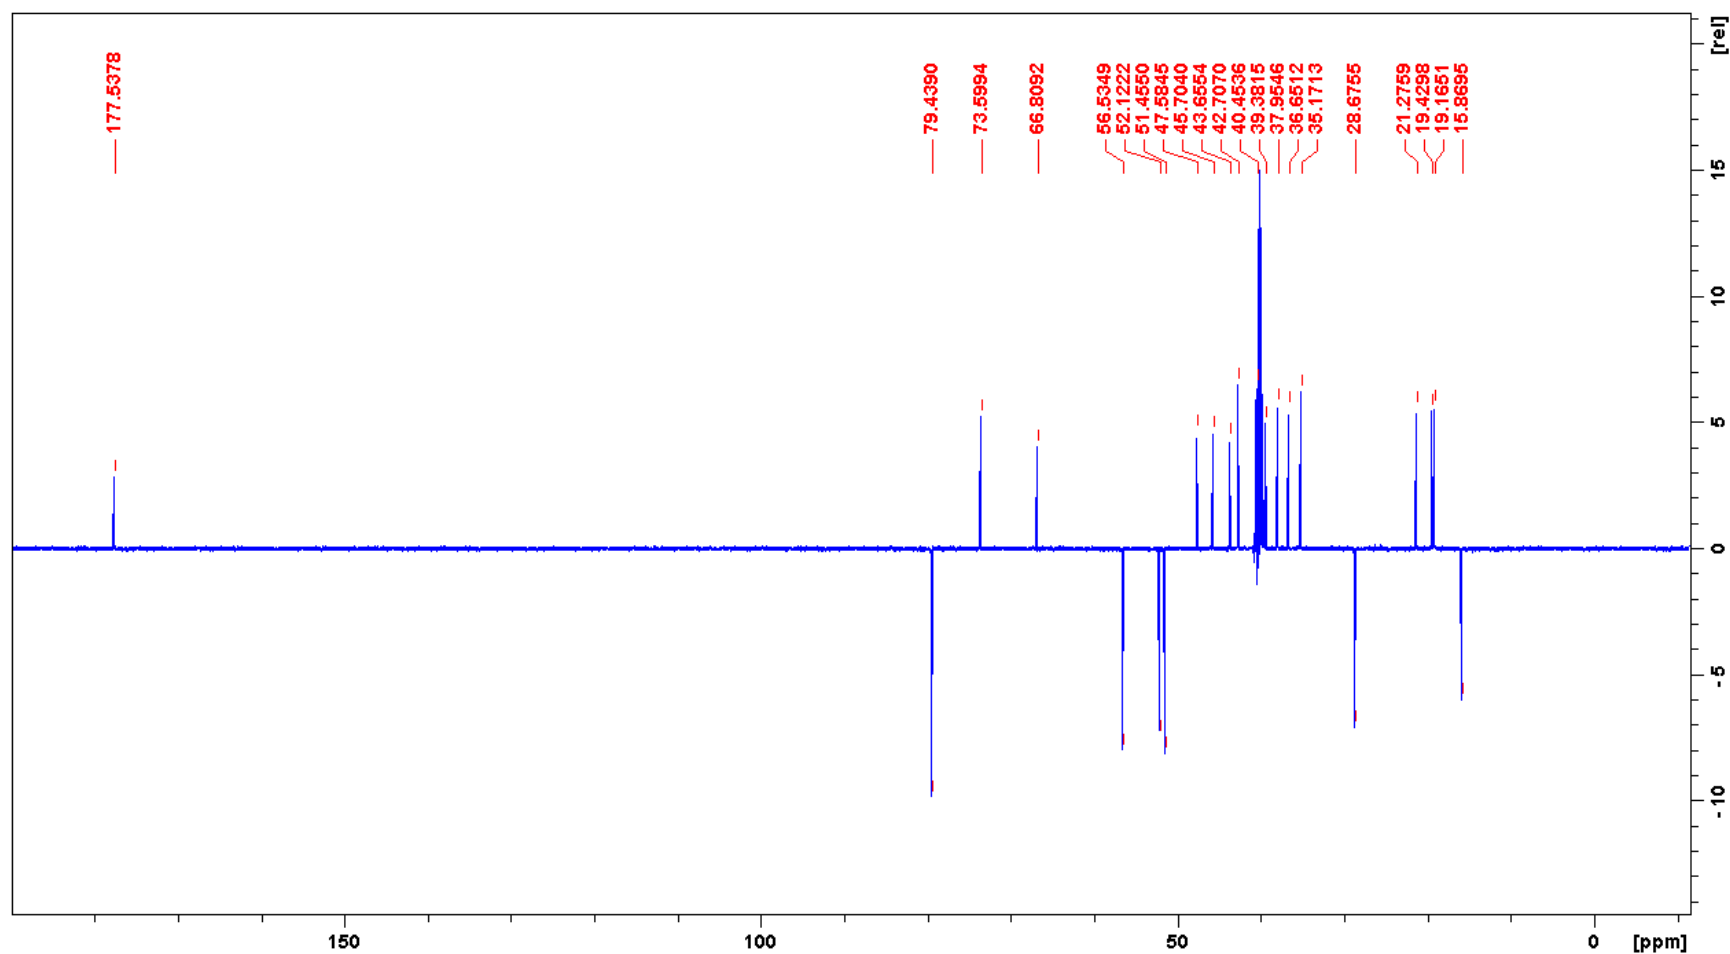

COSY of compound (2'*R*,4*R*,6*aR*,7*R*,9*S*,11*bS*)-methyl 7,9-dihydroxy-4,11*b*-dimethyldodecahydro-1*H*-spiro[6*a*,9-methanocyclohepta[*a*]naphthalene-8,2'-oxirane]-4-carboxylate (**4b**)

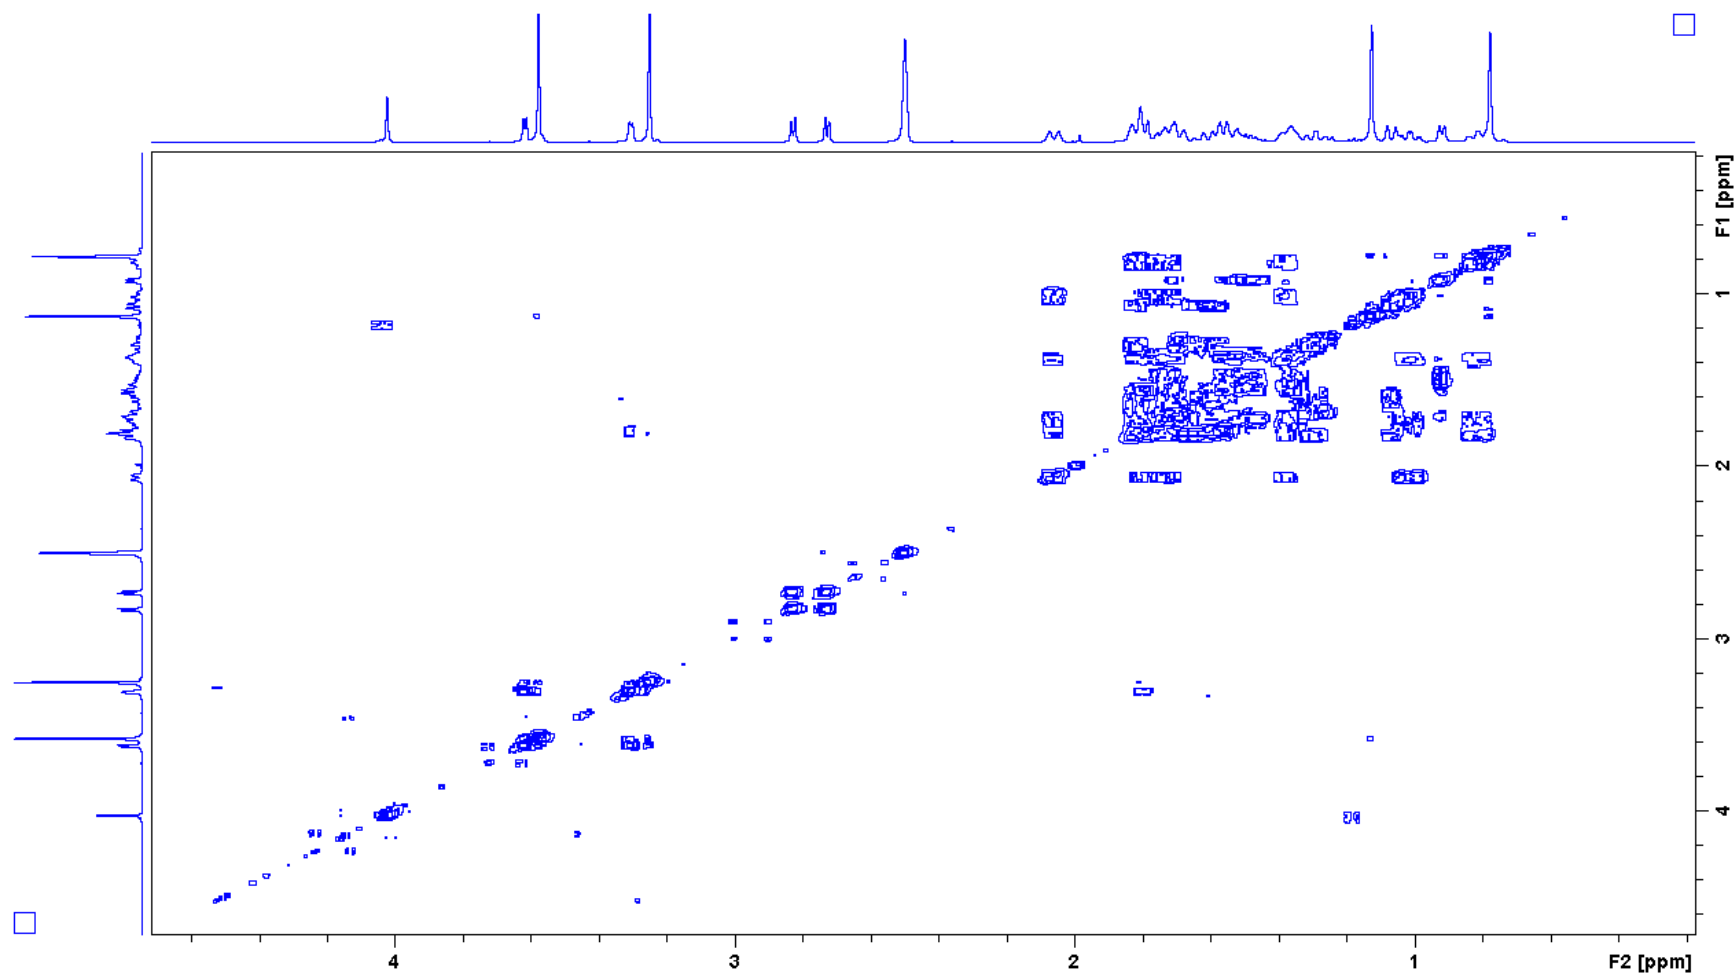

NOESY of compound (2'*R*,4*R*,6*aR*,7*R*,9*S*,11*bS*)-methyl 7,9-dihydroxy-4,11*b*-dimethyldodecahydro-1*H*-spiro[6*a*,9-methanocyclohepta[*a*]naphthalene-8,2'-oxirane]-4-carboxylate (**4b**)

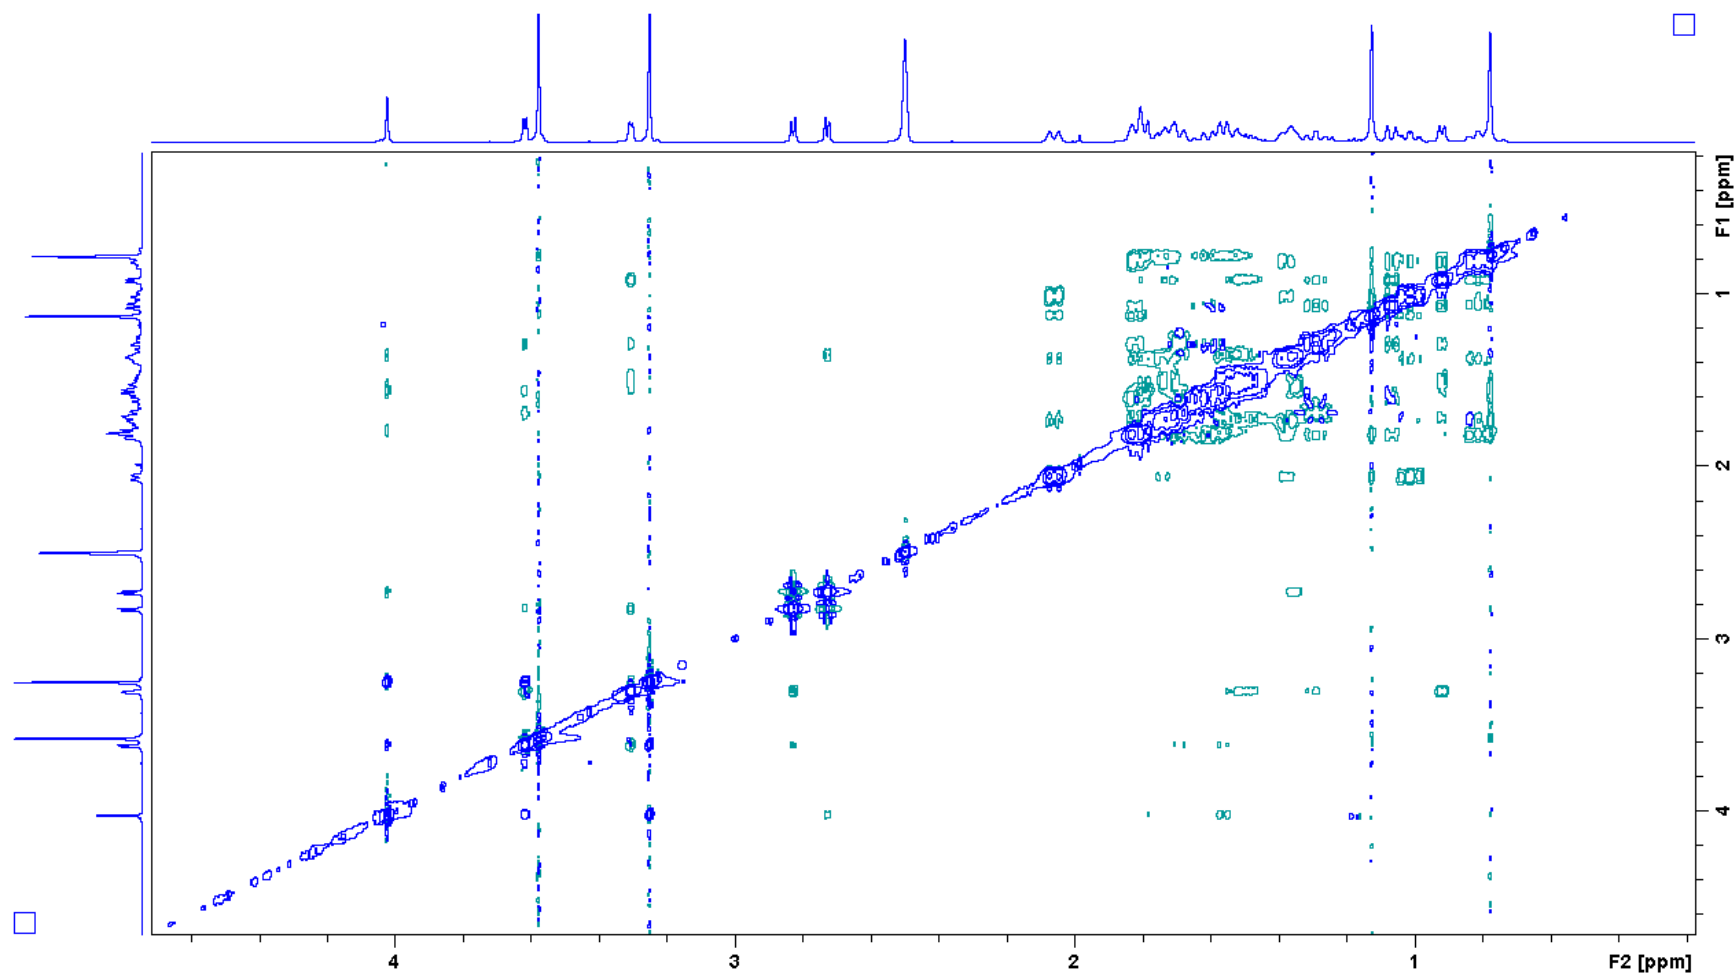

HSQC of compound (2'*R*,4*R*,6*aR*,7*R*,9*S*,11*bS*)-methyl 7,9-dihydroxy-4,11*b*-dimethyldodecahydro-1*H*-spiro[6*a*,9-methanocyclohepta[*a*]naphthalene-8,2'-oxirane]-4-carboxylate (**4b**)

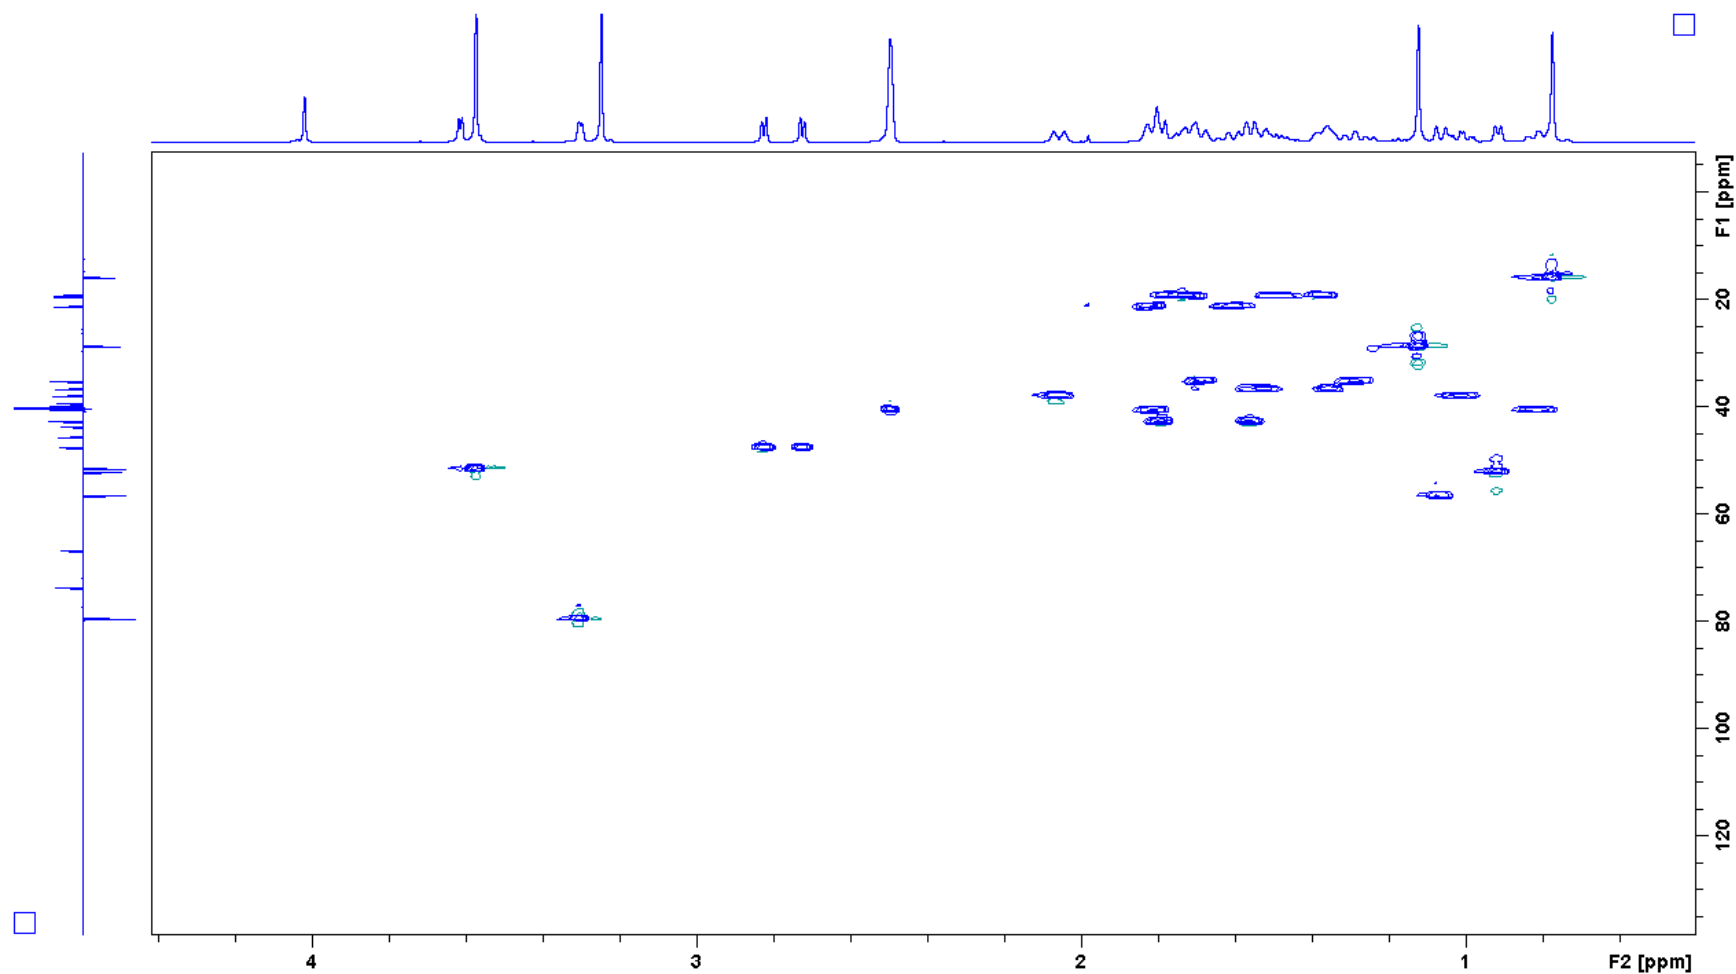

HMBC of compound (2'*R*,4*R*,6*aR*,7*R*,9*S*,11*bS*)-methyl 7,9-dihydroxy-4,11b-dimethyldodecahydro-1H-spiro[6a,9-methanocyclohepta[a]naphthalene-8,2'-oxirane]-4-carboxylate (**4b**)

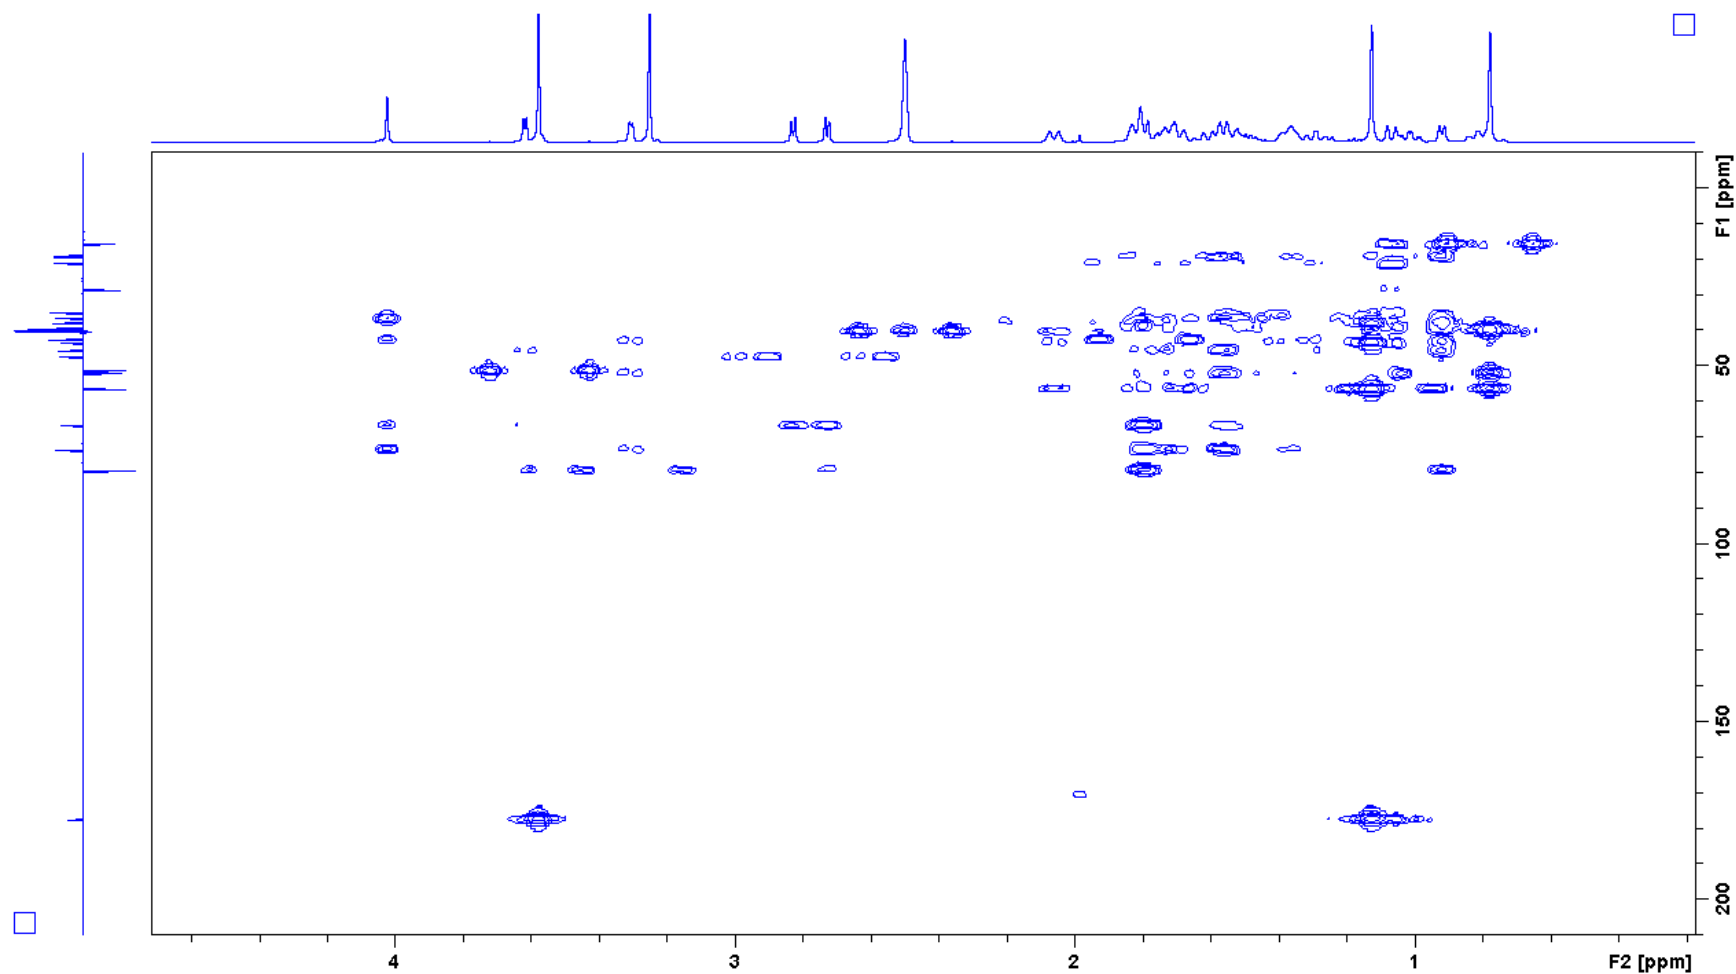

$^1\text{H}$ -NMR of compound (4*R*,6*aR*,7*R*,8*R*,9*S*,11*bS*)-methyl 8-((benzylamino)methyl)-7,8,9-trihydroxy-4,11*b*-dimethyltetradecahydro-6*a*,9-methanocyclohepta[*a*]naphthalene-4-carboxylate (**5**)

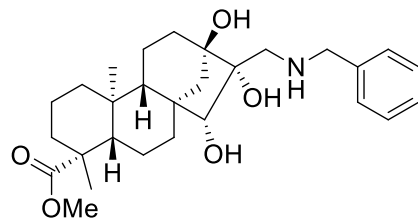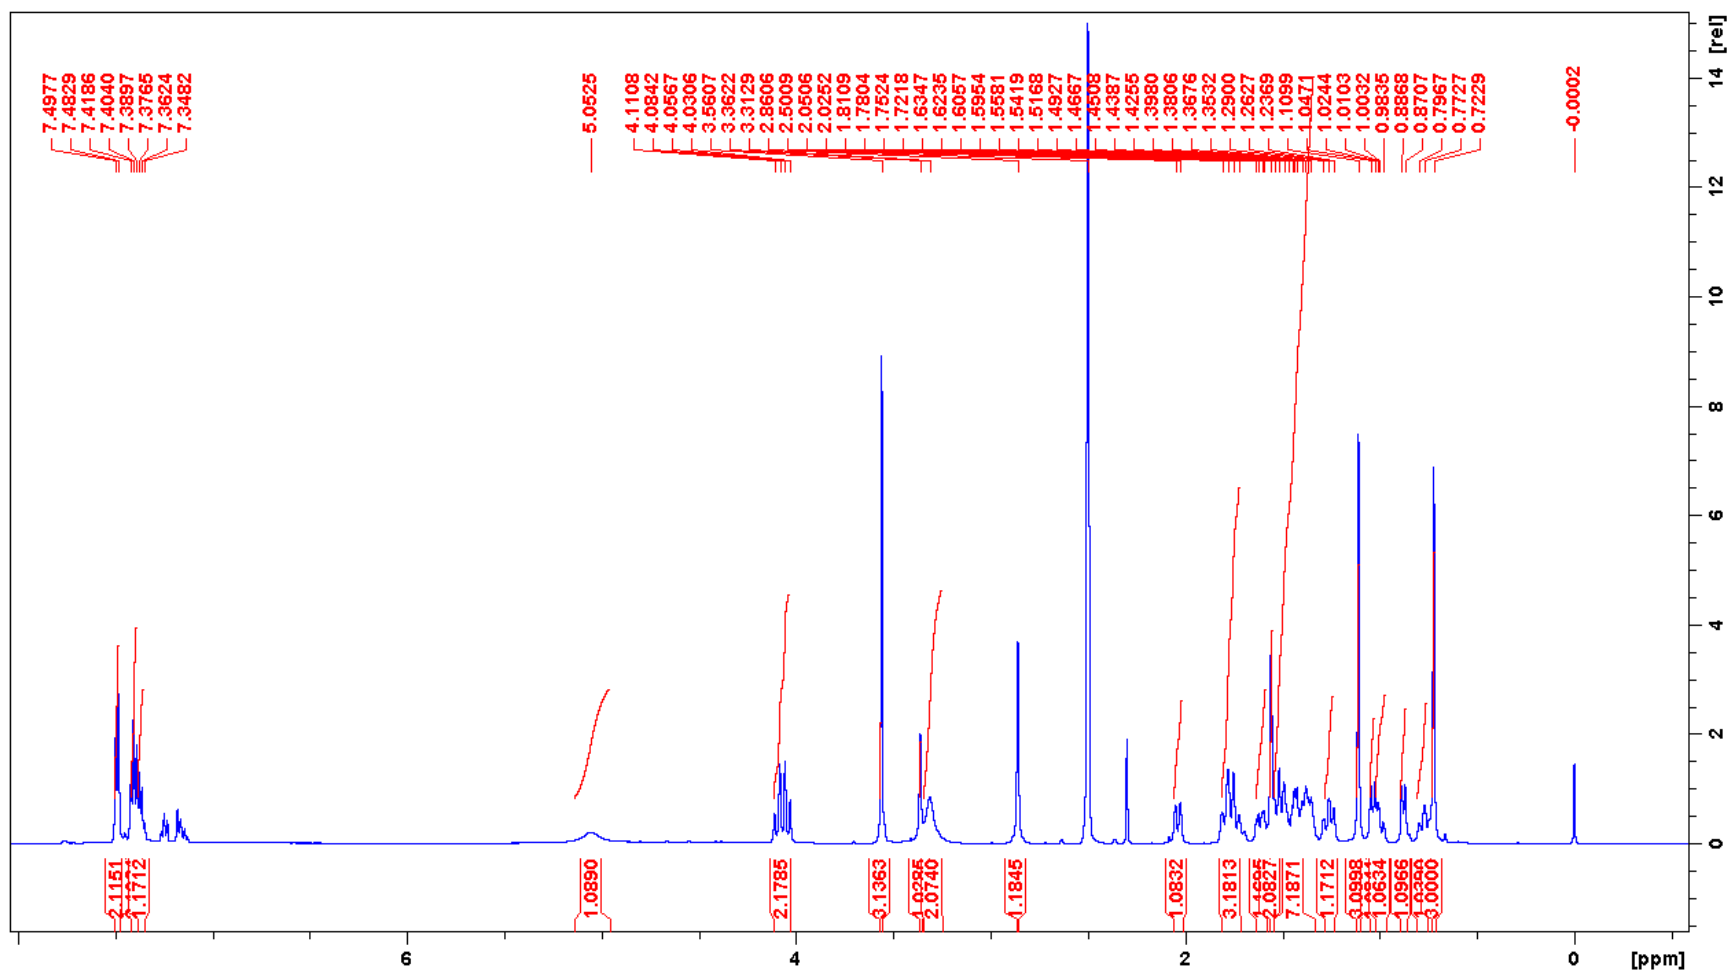



$^{13}\text{C}$ -NMR of compound (4*R*,6*aR*,7*R*,8*R*,9*S*,11*bS*)-methyl 8-((benzylamino)methyl)-7,8,9-trihydroxy-4,11b-dimethyltetradecahydro-6*a*,9-methanocyclohepta[*a*]naphthalene-4-carboxylate (**5**)

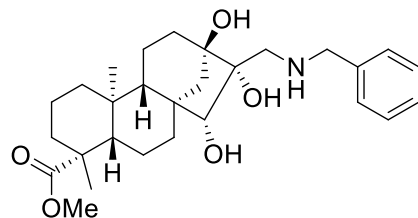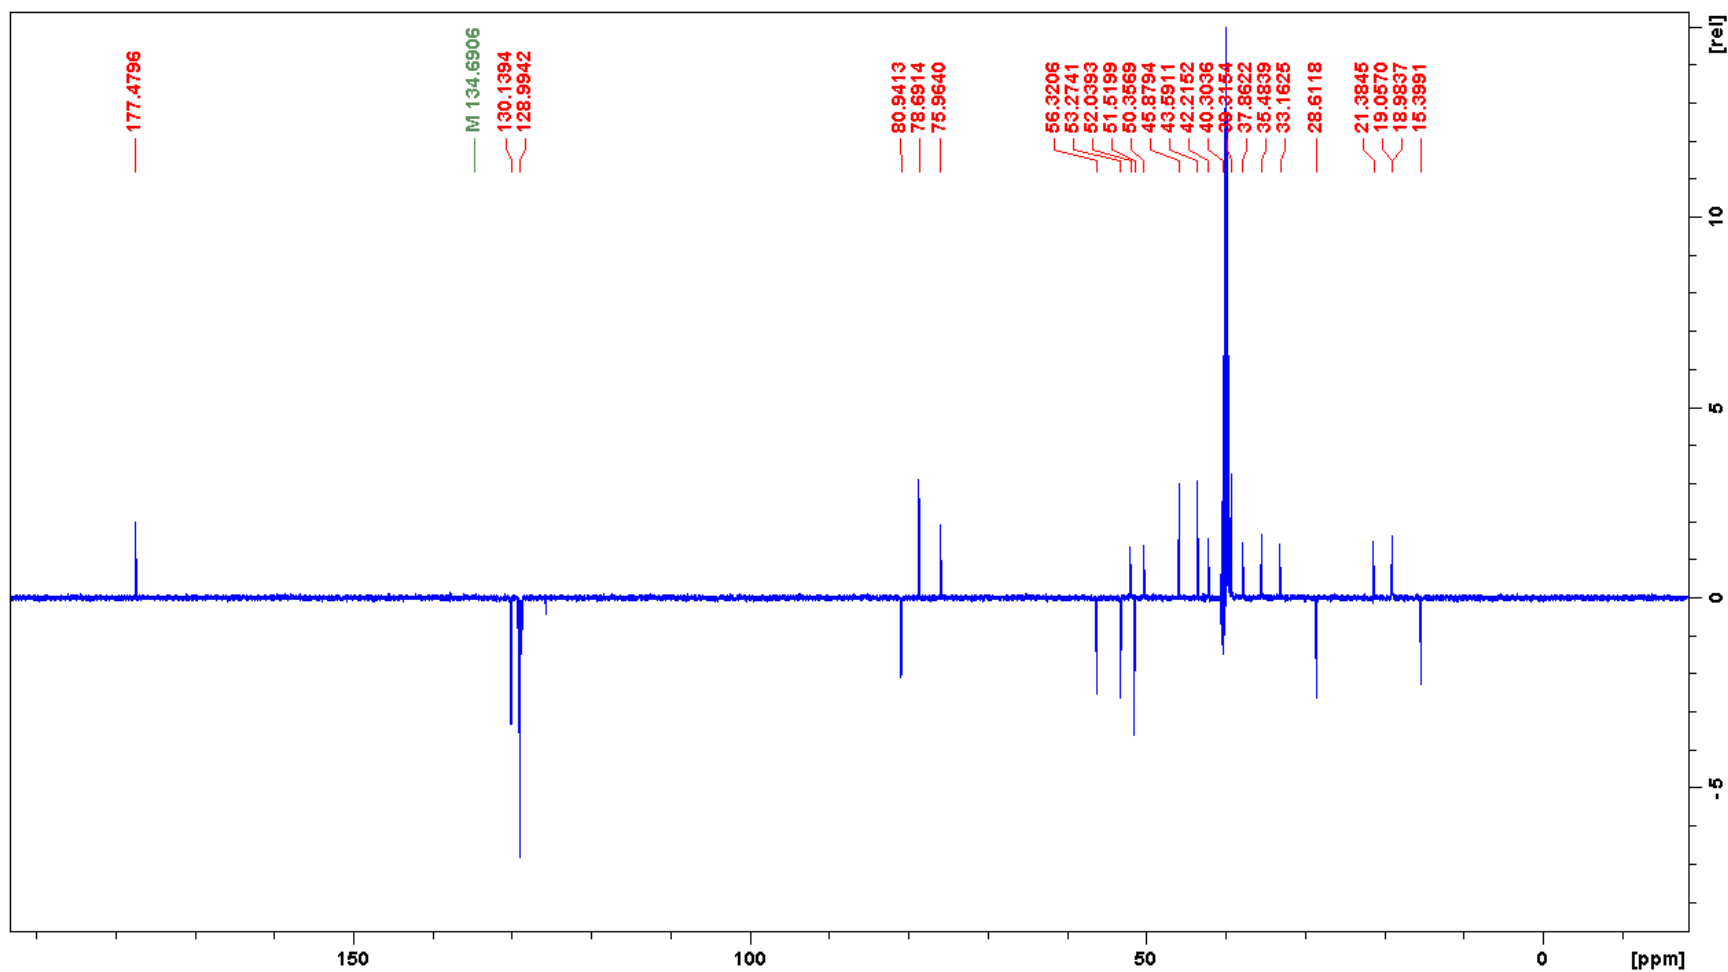

COSY of compound (4*R*,6*aR*,7*R*,8*R*,9*S*,11*bS*)-methyl 8-((benzylamino)methyl)-7,8,9-trihydroxy-4,11b-dimethyltetradecahydro-6*a*,9-methanocyclohepta[*a*]naphthalene-4-carboxylate (**5**)

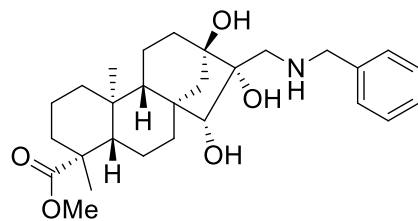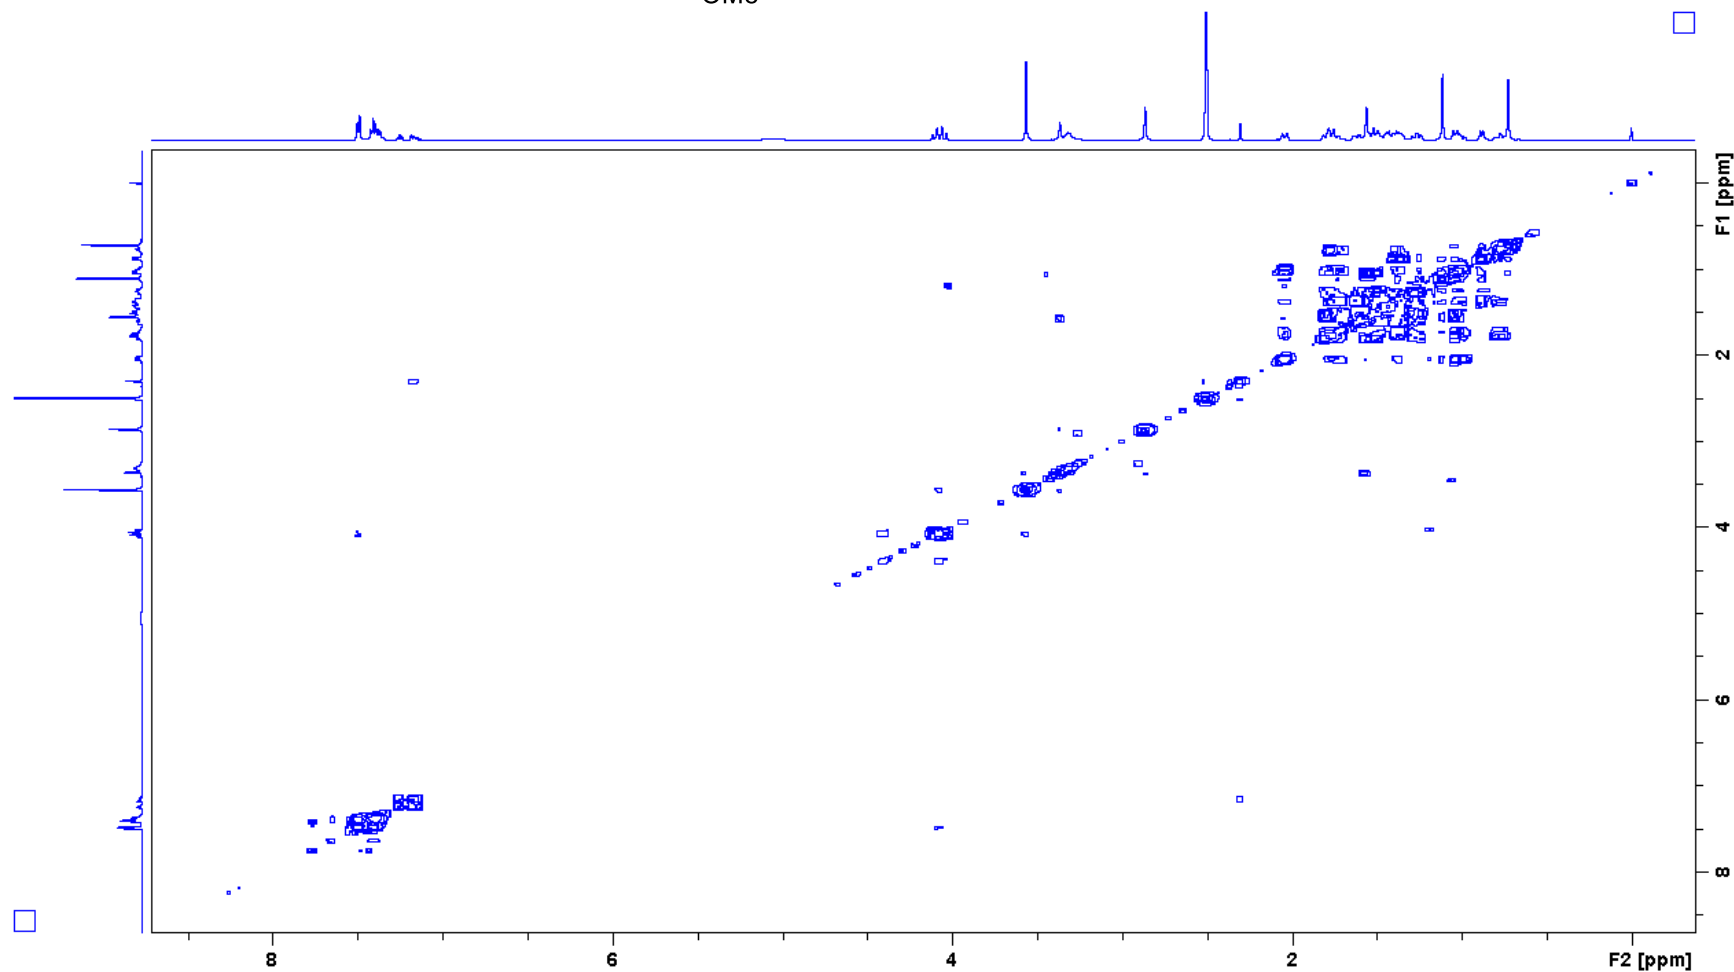

NOESY of compound (4*R*,6*aR*,7*R*,8*R*,9*S*,11*bS*)-methyl 8-((benzylamino)methyl)-7,8,9-trihydroxy-4,11b-dimethyltetradecahydro-6*a*,9-methanocyclohepta[*a*]naphthalene-4-carboxylate (**5**)

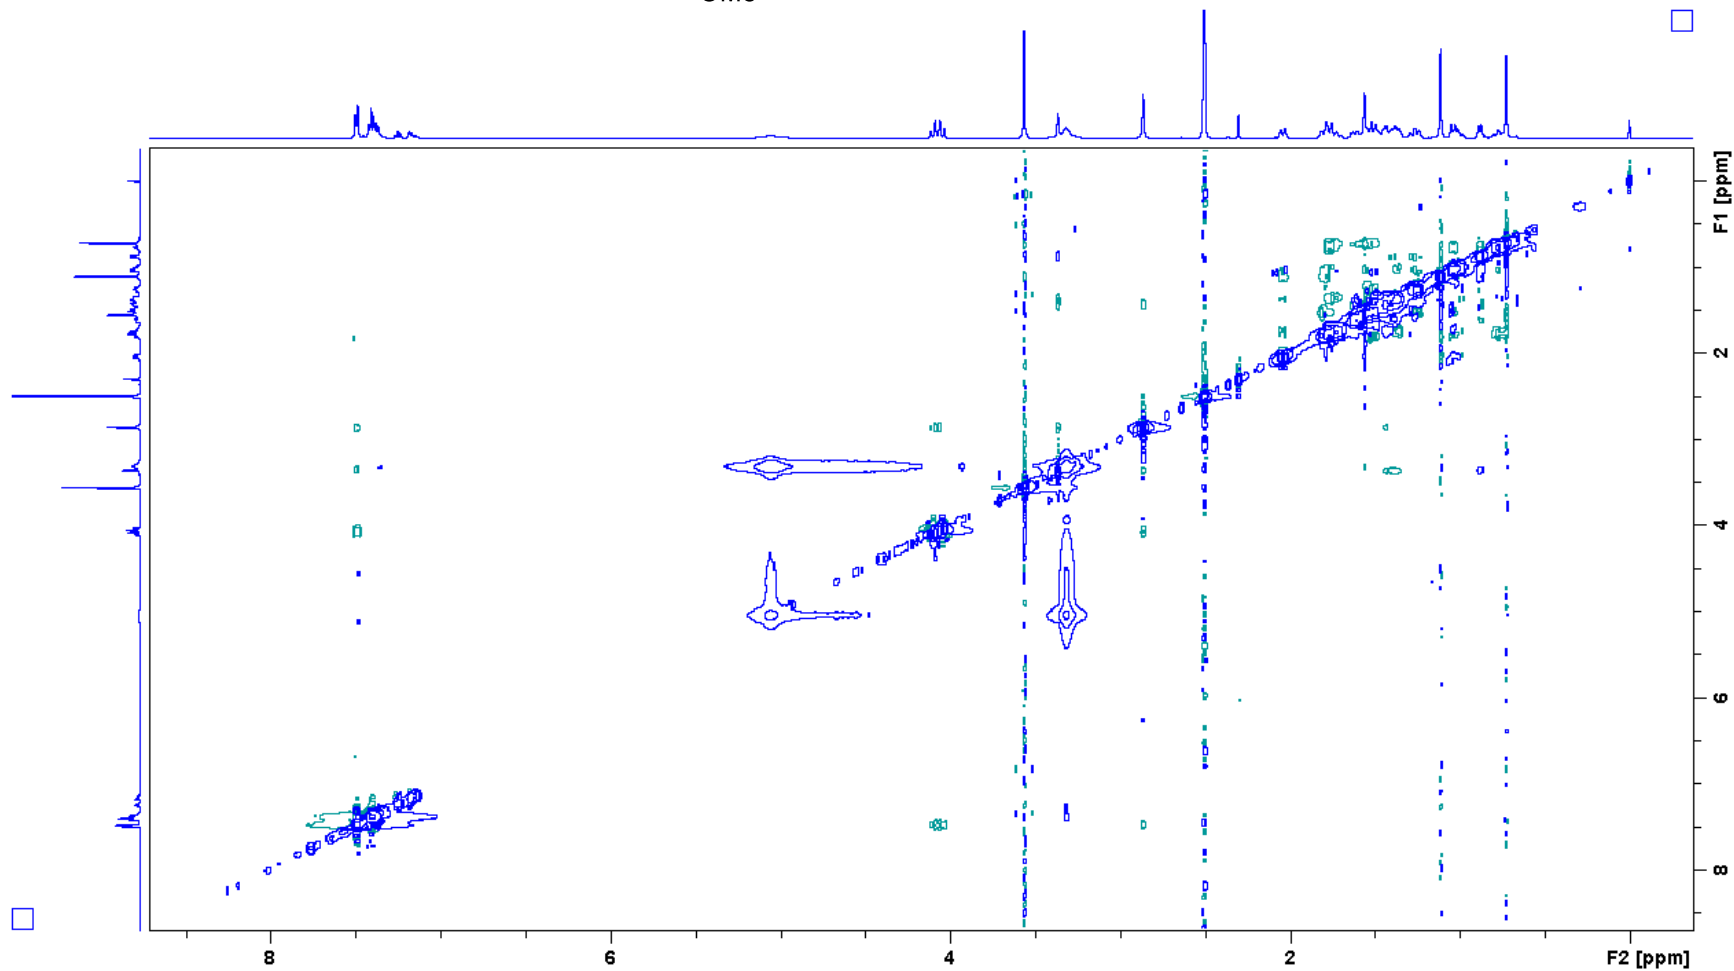

HSQC of compound (4*R*,6*aR*,7*R*,8*R*,9*S*,11*bS*)-methyl 8-((benzylamino)methyl)-7,8,9-trihydroxy-4,11b-dimethyltetradecahydro-6*a*,9-methanocyclohepta[*a*]naphthalene-4-carboxylate (**5**)

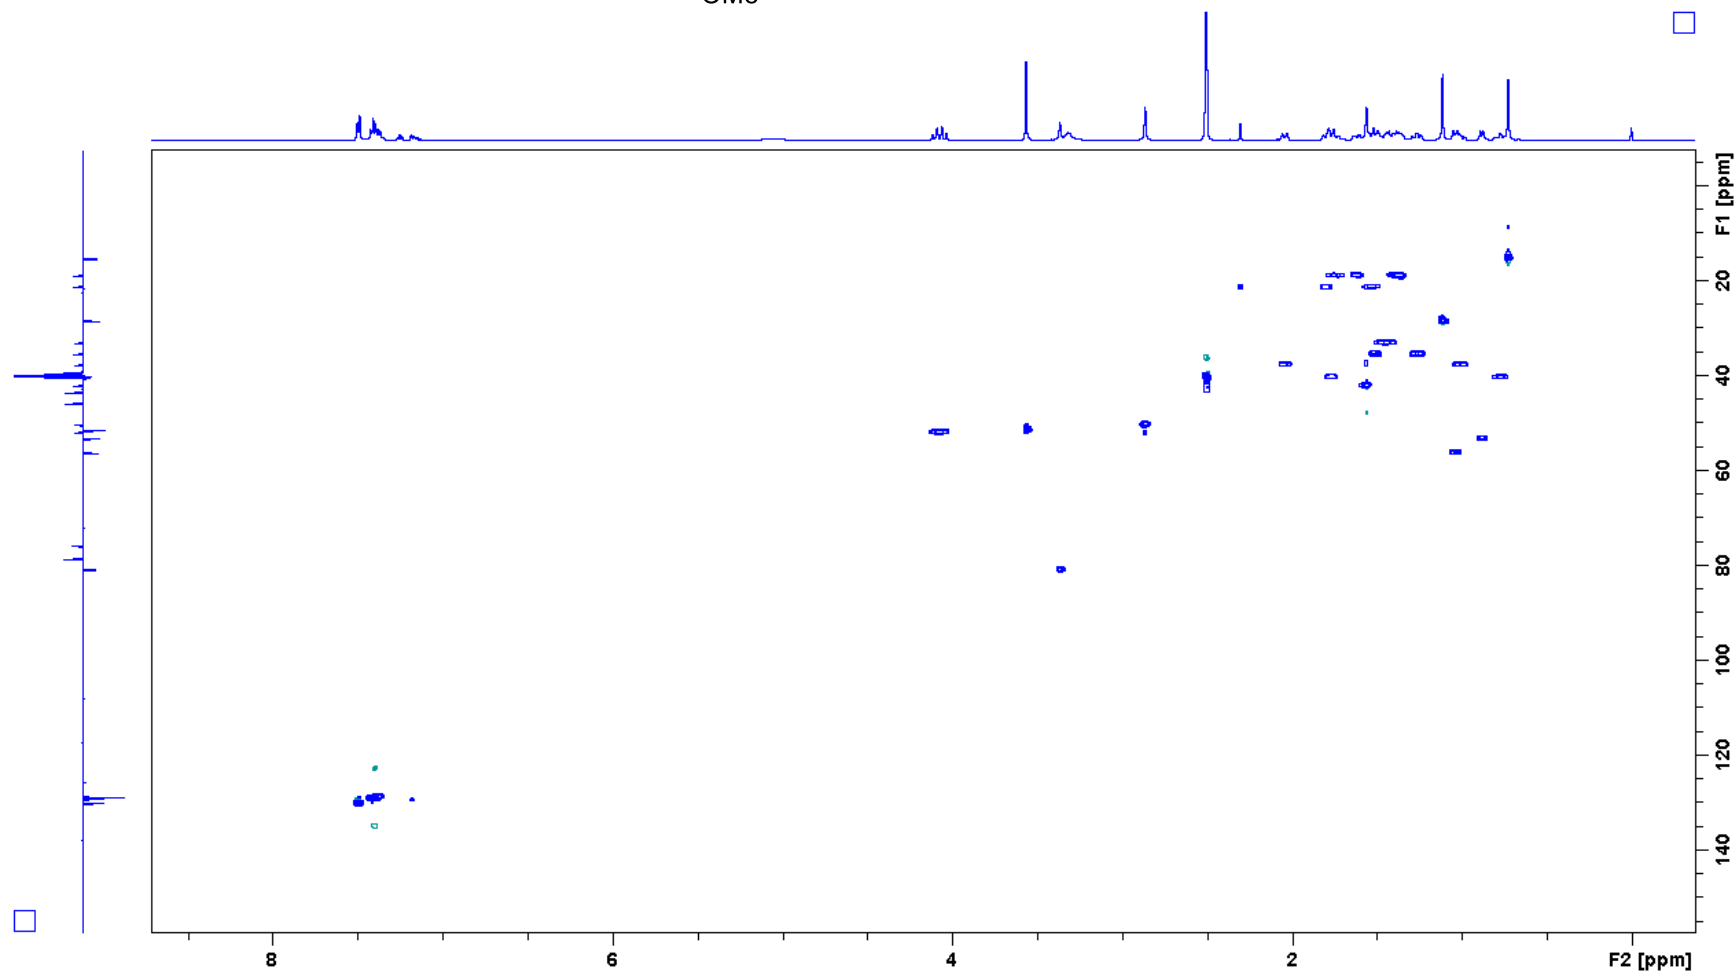

HMBC of compound (4*R*,6*aR*,7*R*,8*R*,9*S*,11*bS*)-methyl 8-((benzylamino)methyl)-7,8,9-trihydroxy-4,11*b*-dimethyltetradecahydro-6*a*,9-methanocyclohepta[*a*]naphthalene-4-carboxylate (**5**)

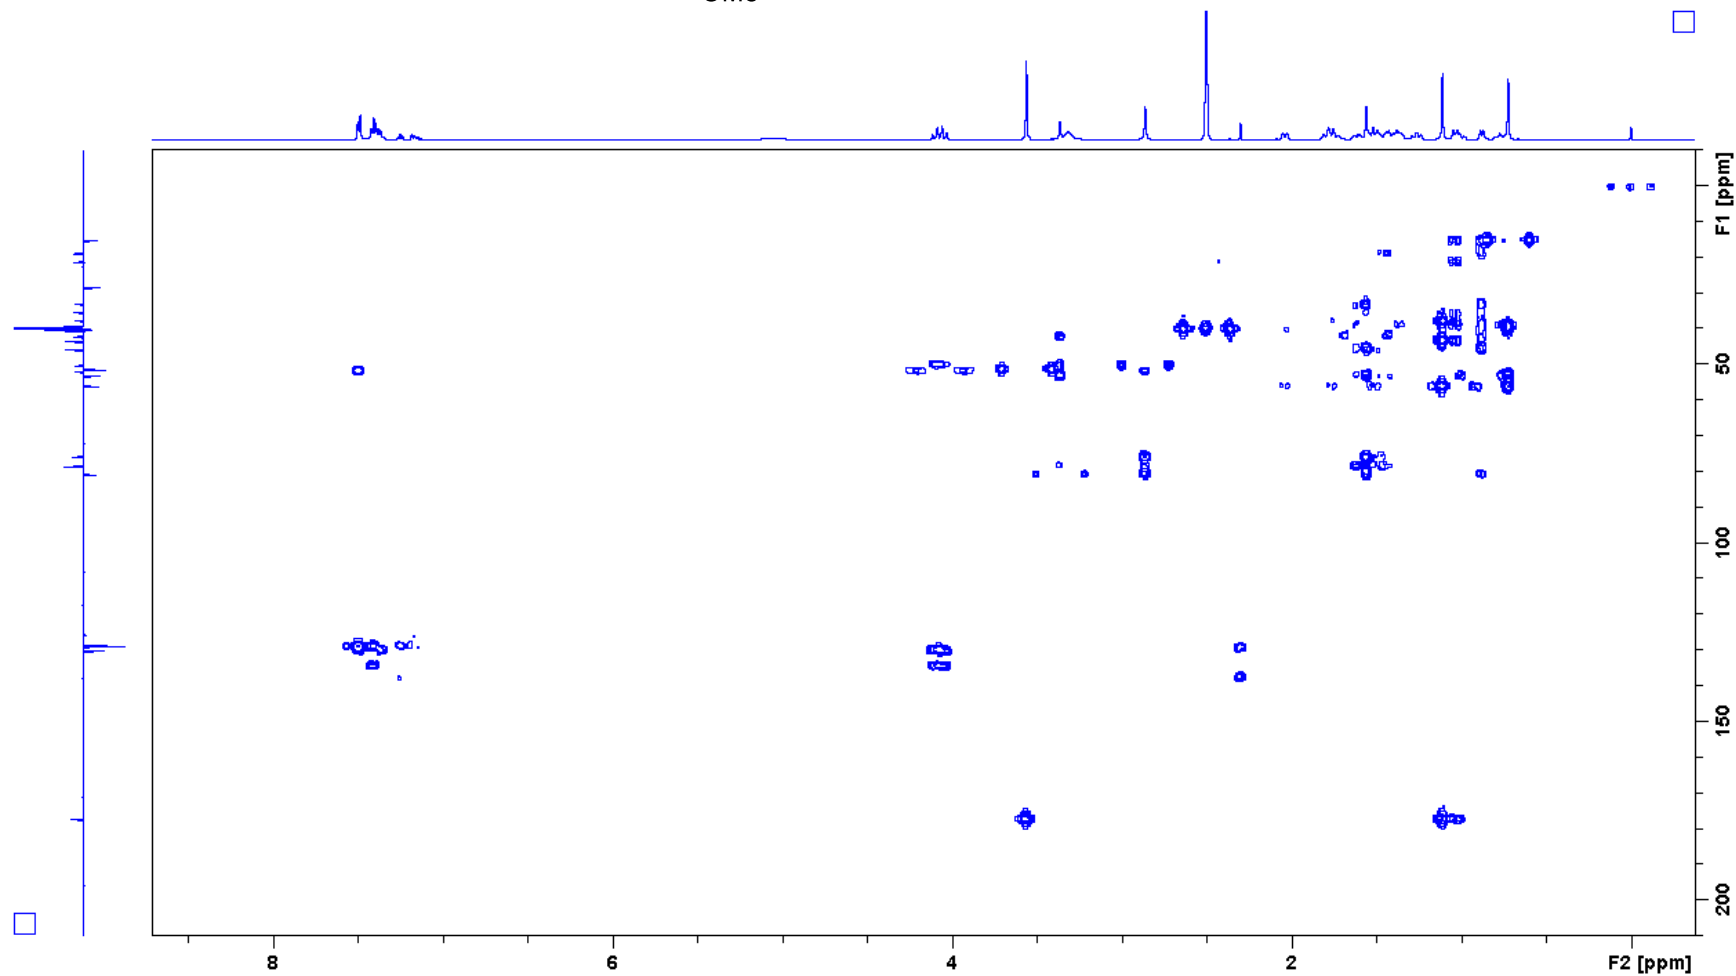

$^1\text{H}$ -NMR of compound (4*R*,6*aR*,7*R*,8*R*,9*S*,11*bS*)-methyl 8-((benzyl(methyl)amino)methyl)-7,8,9-trihydroxy-4,11*b*-dimethyltetradecahydro-6*a*,9-methanocyclohepta[*a*]naphthalene-4-carboxylate (**6**)

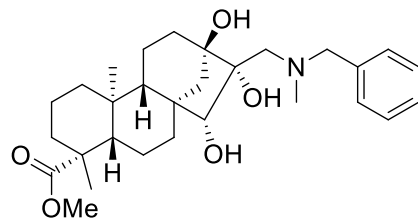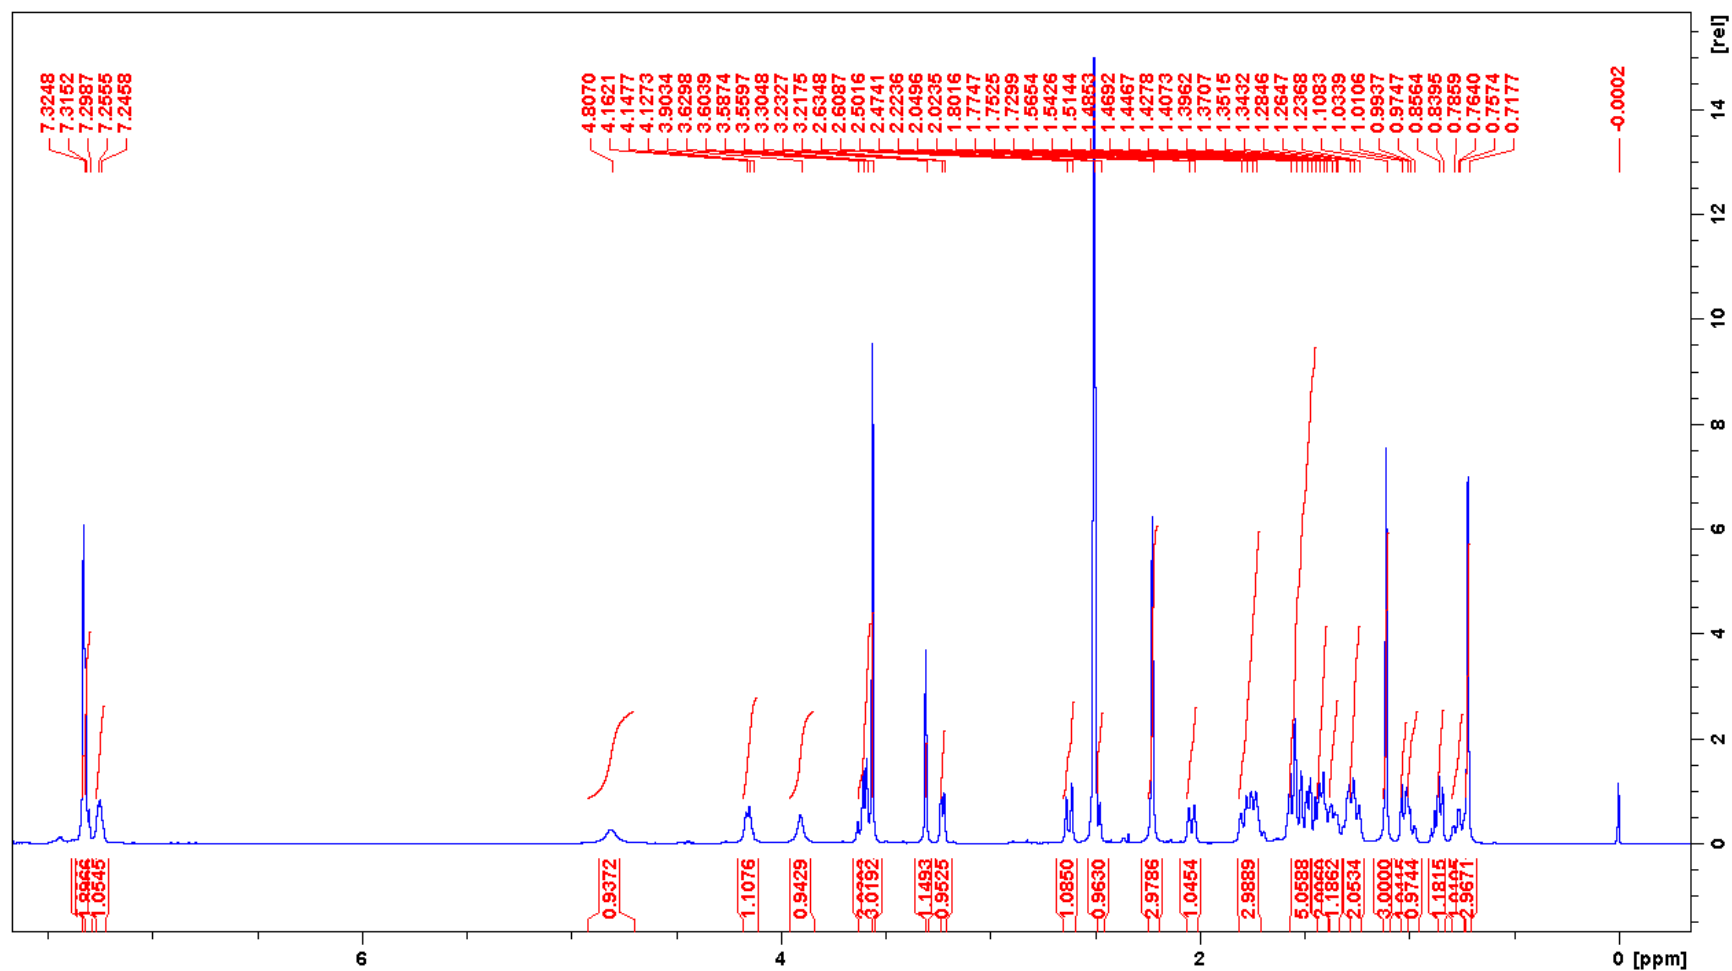

$^{13}\text{C}$ -NMR of compound (4*R*,6*aR*,7*R*,8*R*,9*S*,11*bS*)-methyl 8-((benzyl(methyl)amino)methyl)-7,8,9-trihydroxy-4,11b-dimethyltetradecahydro-6*a*,9-methanocyclohepta[*a*]naphthalene-4-carboxylate (**6**)

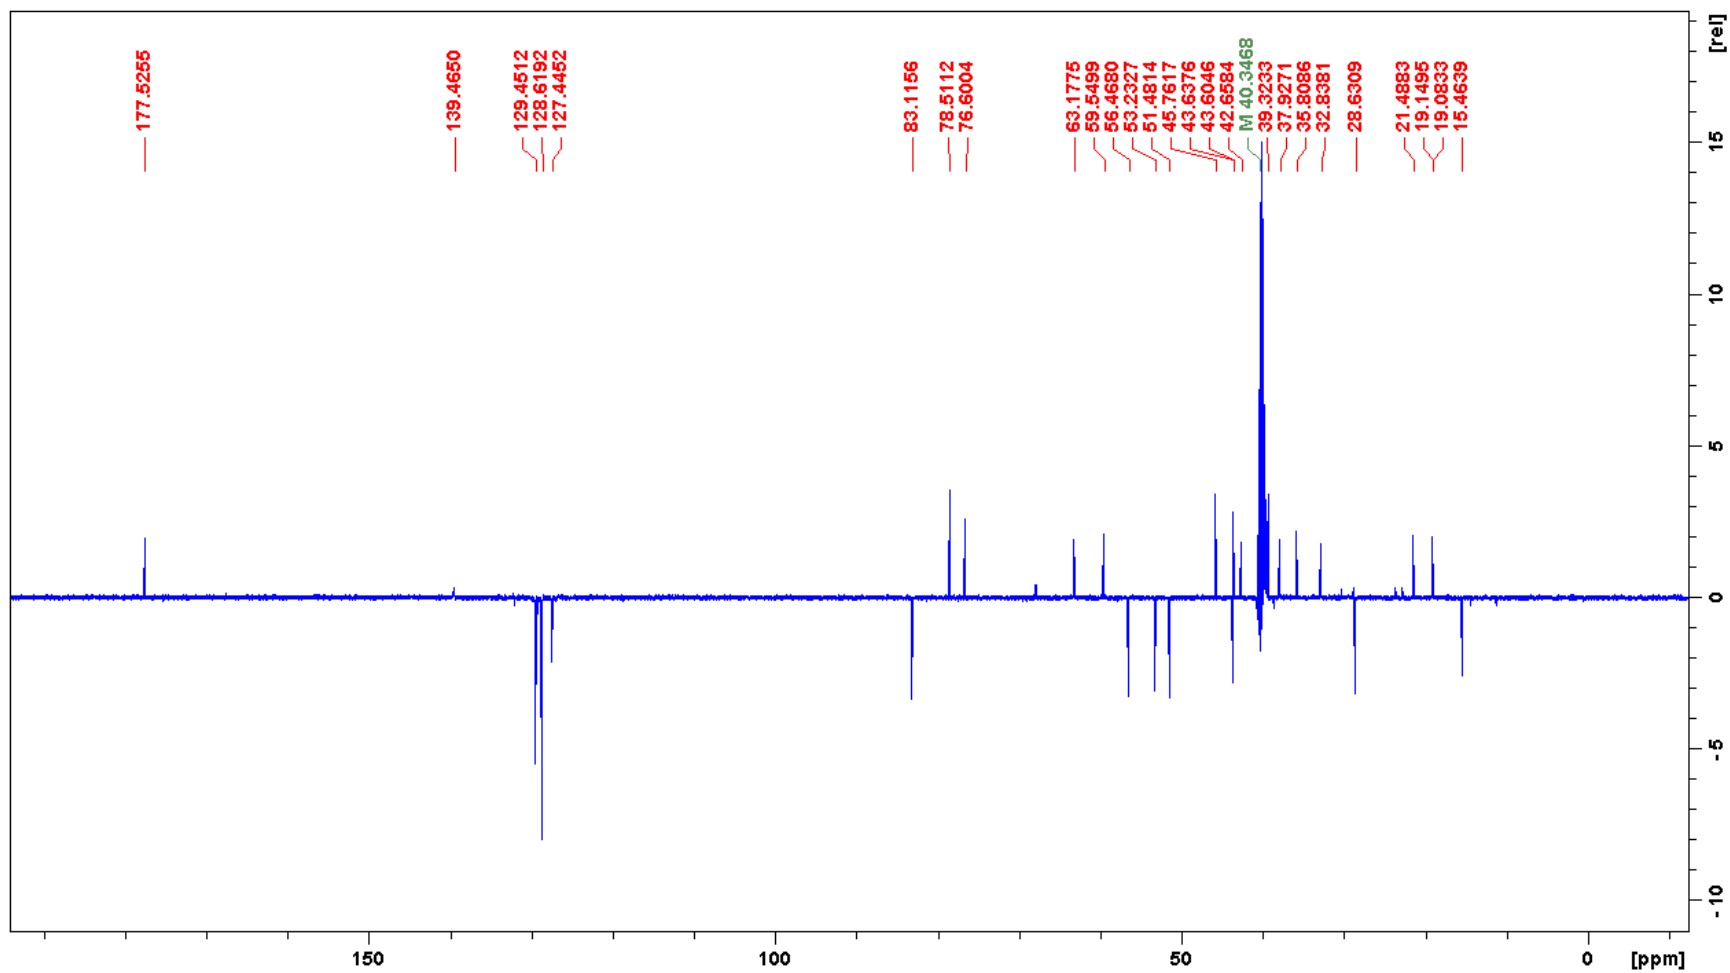

COSY of compound (4*R*,6*aR*,7*R*,8*R*,9*S*,11*bS*)-methyl 8-((benzyl(methyl)amino)methyl)-7,8,9-trihydroxy-4,11b-dimethyltetradecahydro-6*a*,9-methanocyclohepta[*a*]naphthalene-4-carboxylate (**6**)

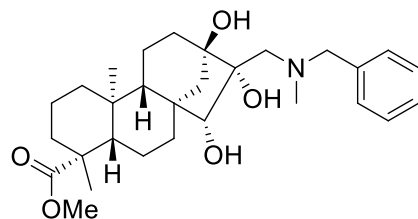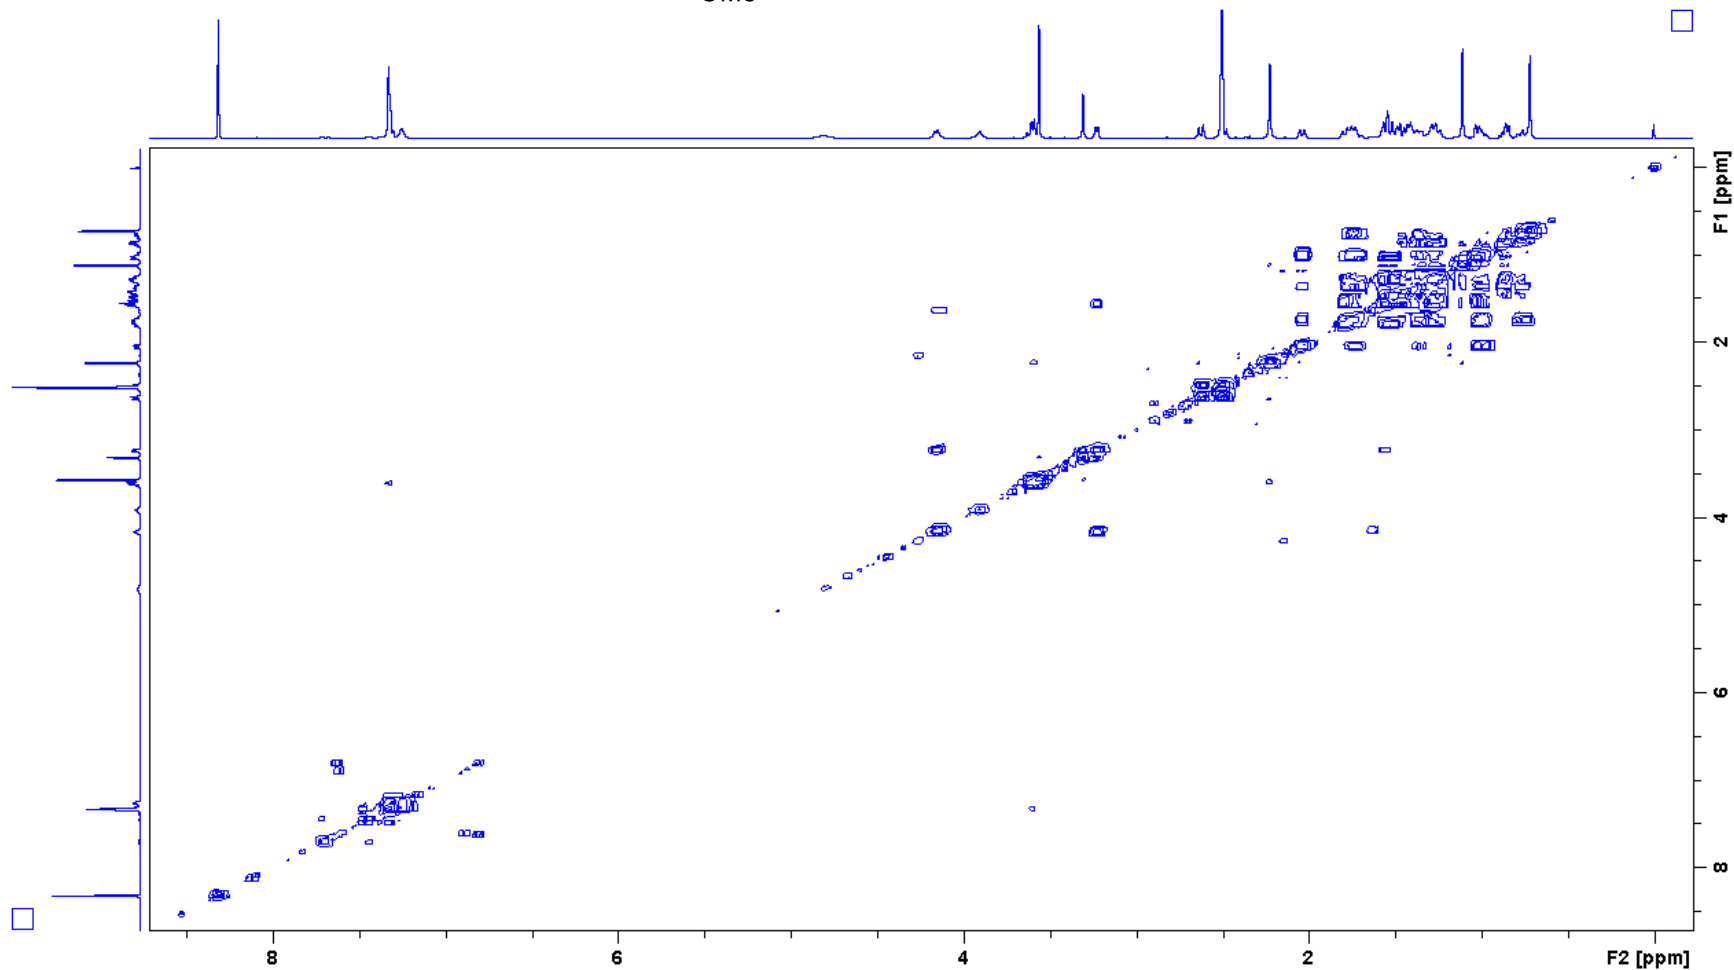



NOESY of compound (4*R*,6*aR*,7*R*,8*R*,9*S*,11*bS*)-methyl 8-((benzyl(methyl)amino)methyl)-7,8,9-trihydroxy-4,11b-dimethyltetradecahydro-6*a*,9-methanocyclohepta[*a*]naphthalene-4-carboxylate (**6**)

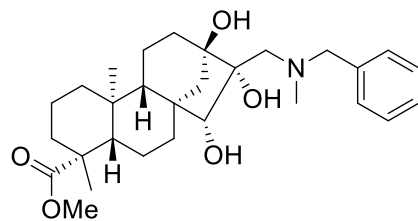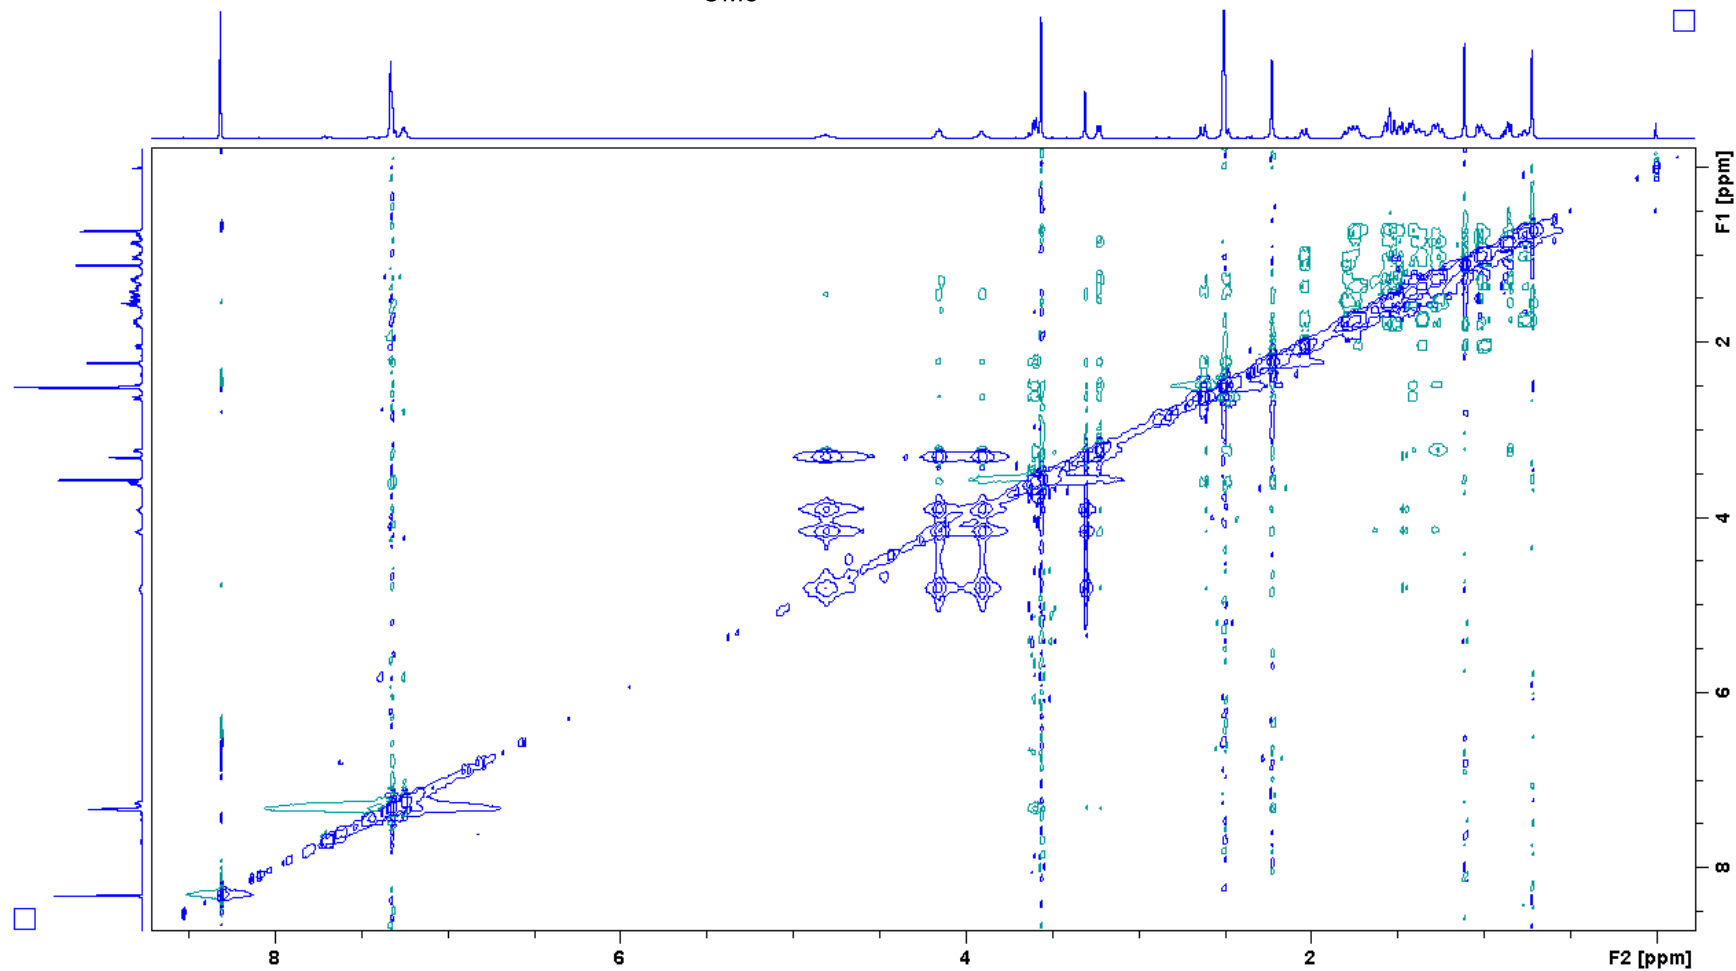

HSQC of compound (4*R*,6*aR*,7*R*,8*R*,9*S*,11*bS*)-methyl 8-((benzyl(methyl)amino)methyl)-7,8,9-trihydroxy-4,11b-dimethyltetradecahydro-6*a*,9-methanocyclohepta[*a*]naphthalene-4-carboxylate (**6**)

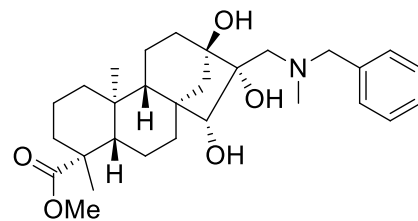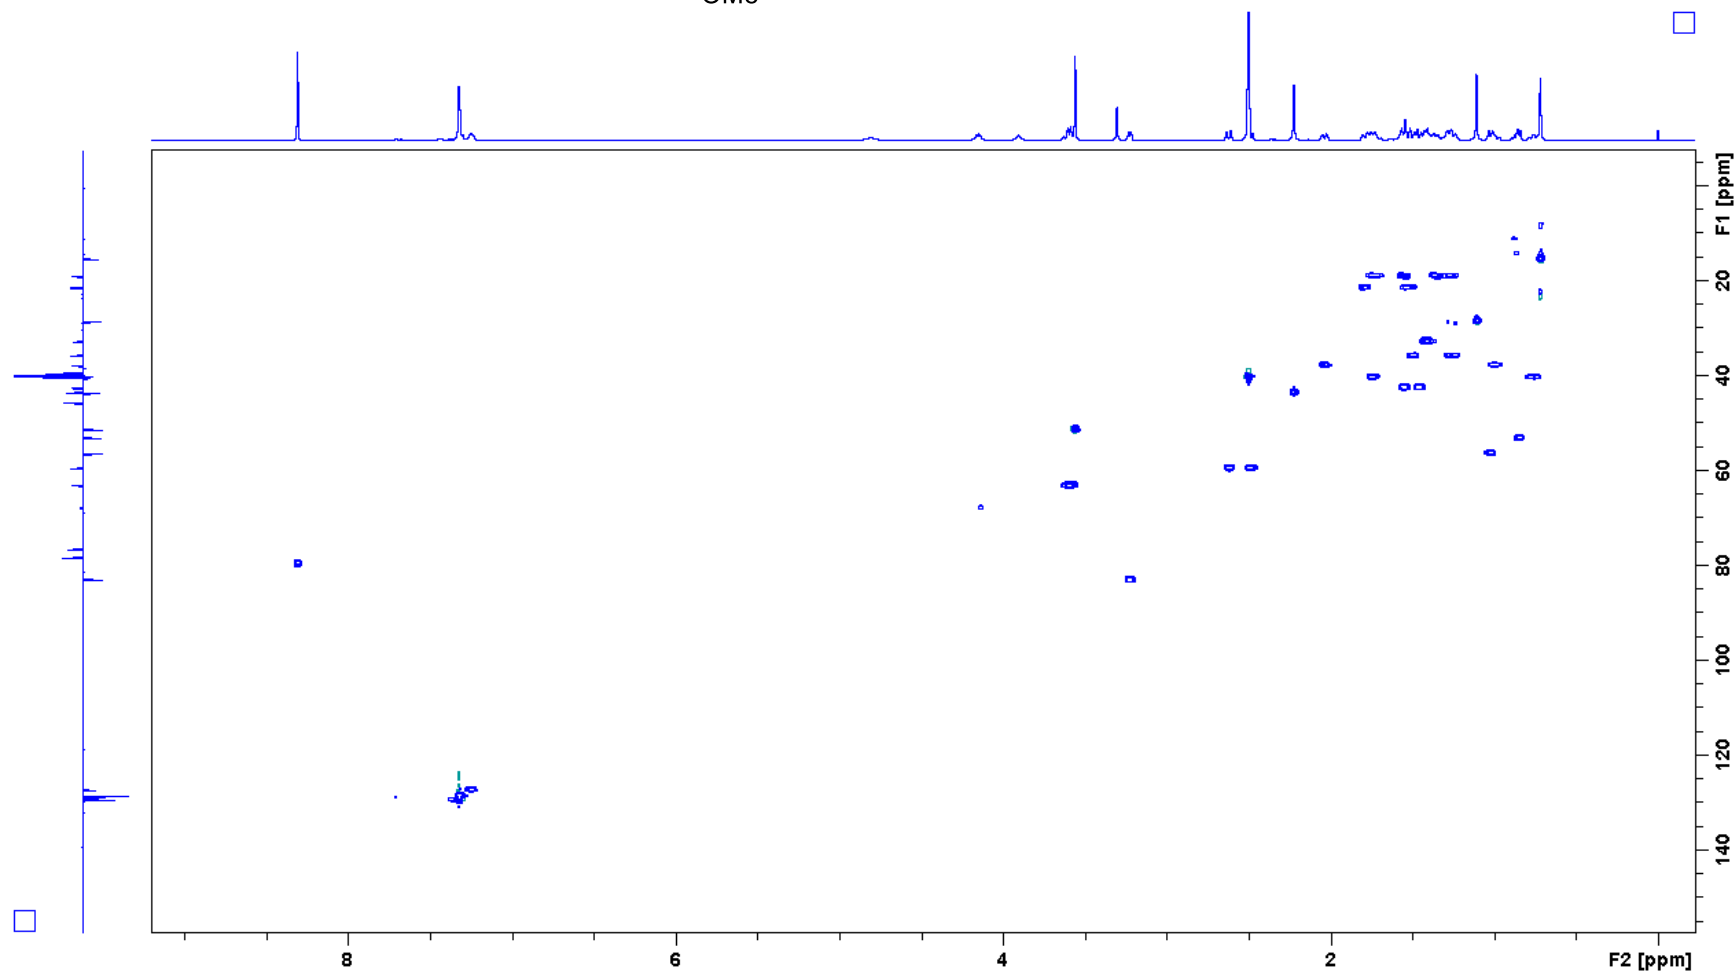

HMBC of compound (4*R*,6*aR*,7*R*,8*R*,9*S*,11*bS*)-methyl 8-((benzyl(methyl)amino)methyl)-7,8,9-trihydroxy-4,11b-dimethyltetradecahydro-6*a*,9-methanocyclohepta[*a*]naphthalene-4-carboxylate (**6**)

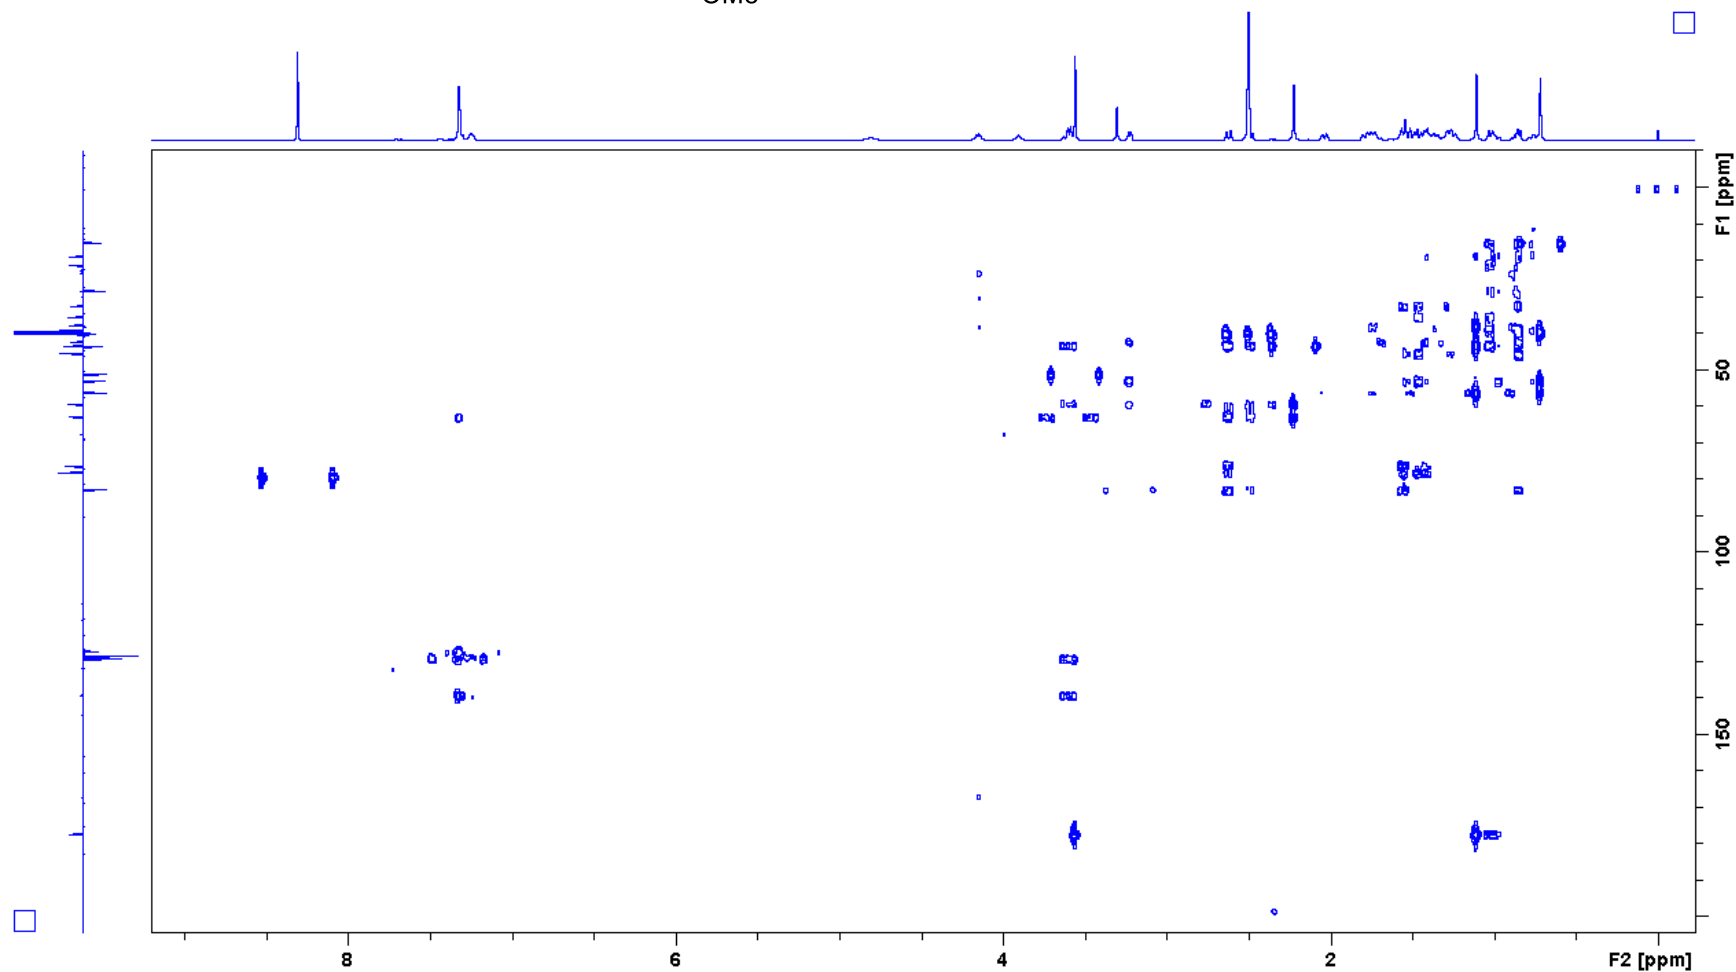

$^1\text{H}$ -NMR of compound (4*R*,6*aR*,7*R*,8*R*,9*S*,11*bS*)-methyl 7,8,9-trihydroxy-4,11*b*-dimethyl-8-(((*R*)-1-phenylethyl)amino)methyl)tetradecahydro-6*a*,9-methanocyclohepta[*a*]naphthalene-4-carboxylate (**7**)

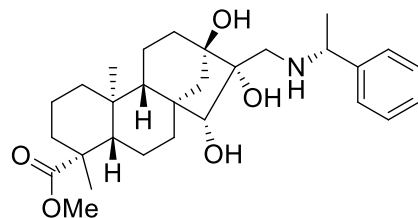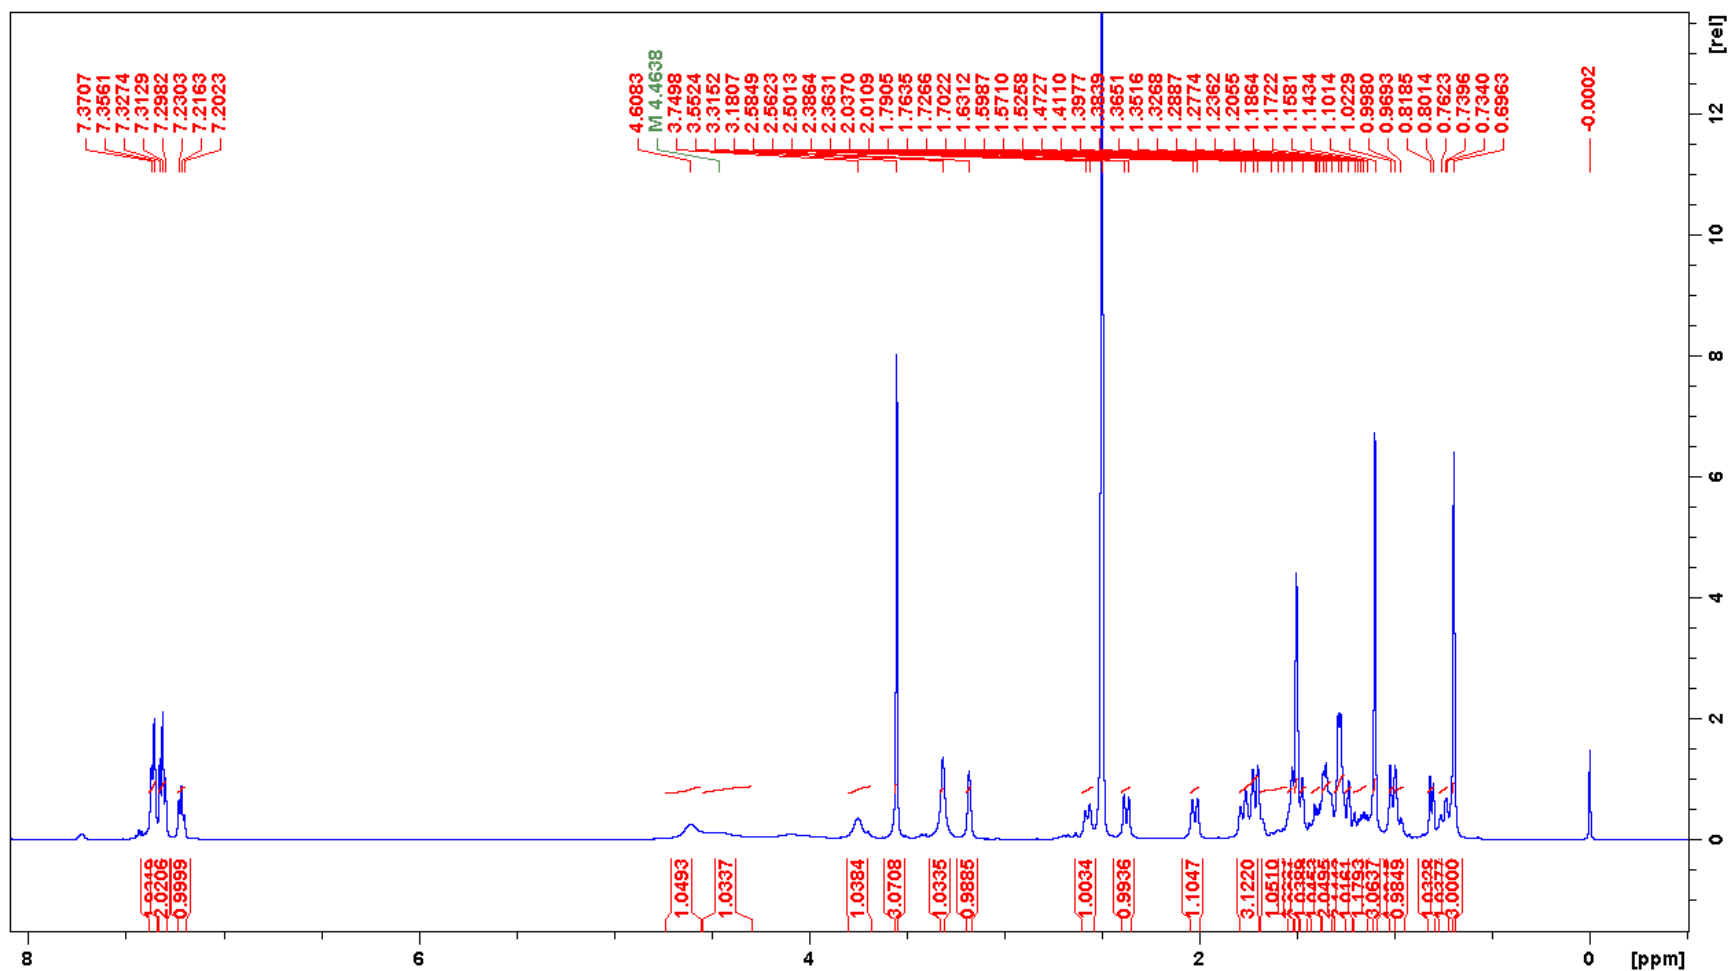

$^{13}\text{C}$ -NMR of compound (4*R*,6*aR*,7*R*,8*R*,9*S*,11*bS*)-methyl 7,8,9-trihydroxy-4,11*b*-dimethyl-8-(((*R*)-1-phenylethyl)amino)methyl)tetradecahydro-6*a*,9-methanocyclohepta[*a*]naphthalene-4-carboxylate (**7**)

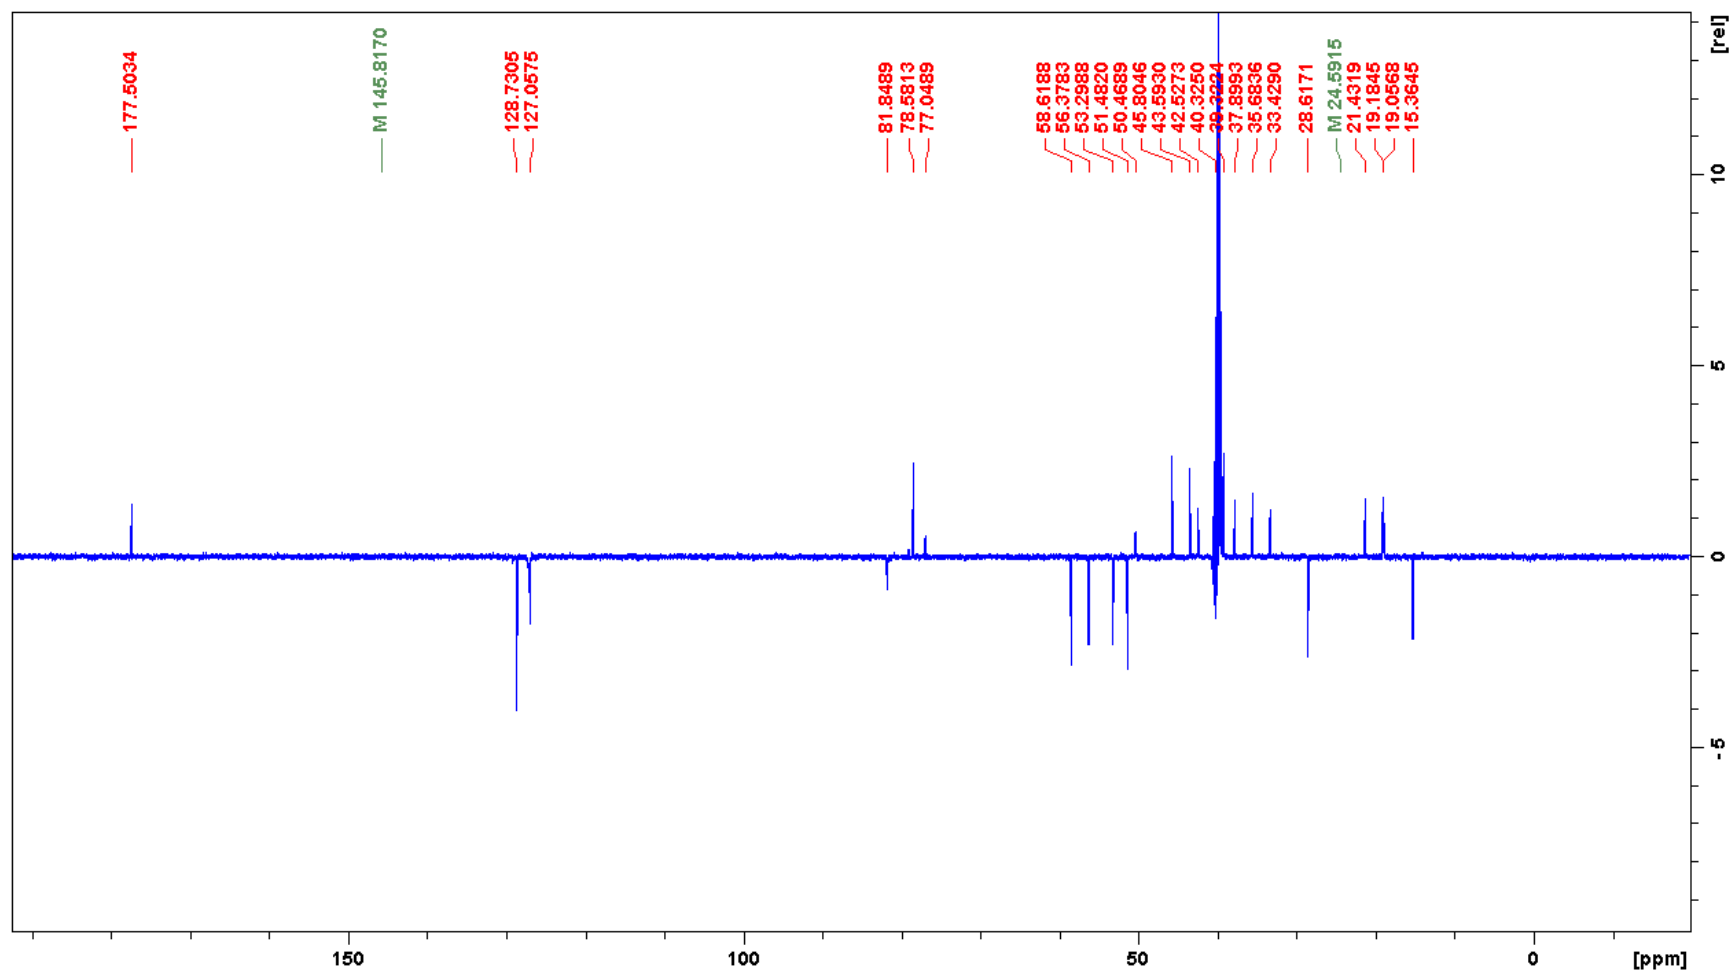

COSY of compound (4*R*,6*aR*,7*R*,8*R*,9*S*,11*bS*)-methyl 7,8,9-trihydroxy-4,11*b*-dimethyl-8-((((*R*)-1-phenylethyl)amino)methyl)tetradecahydro-6*a*,9-methanocyclohepta[*a*]naphthalene-4-carboxylate (**7**)

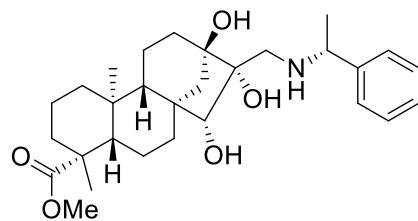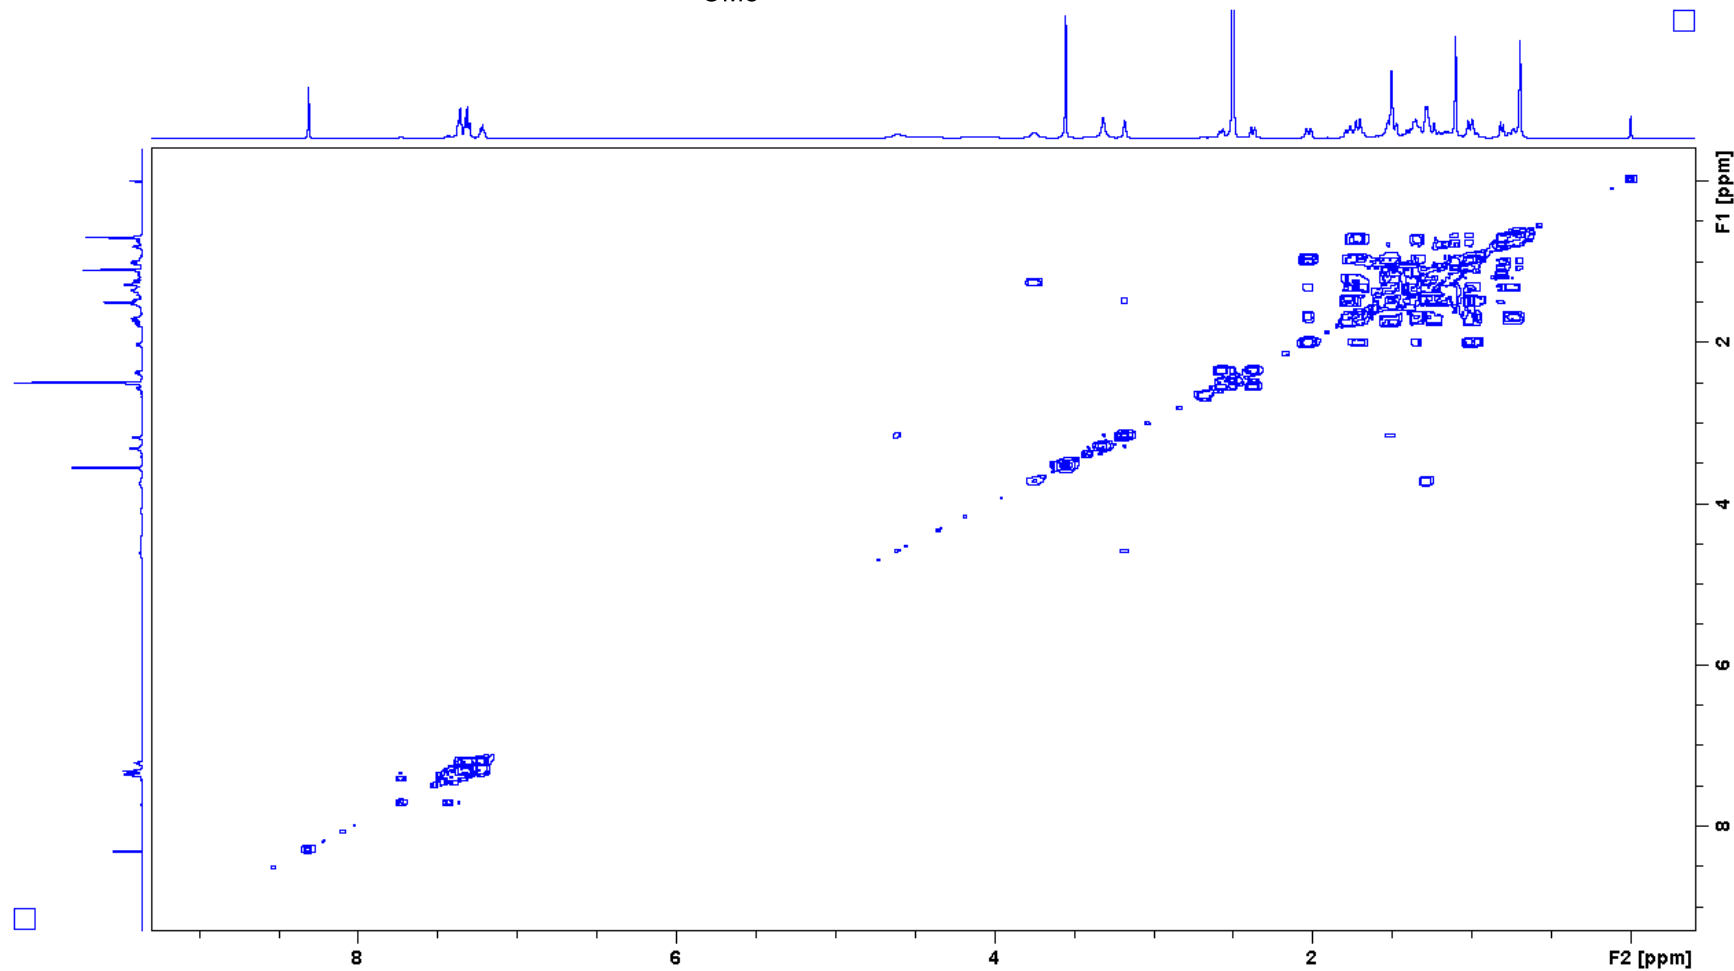

NOESY of compound (4*R*,6*aR*,7*R*,8*R*,9*S*,11*bS*)-methyl 7,8,9-trihydroxy-4,11*b*-dimethyl-8-(((*R*)-1-phenylethyl)amino)methyl)tetradecahydro-6*a*,9-methanocyclohepta[*a*]naphthalene-4-carboxylate (**7**)

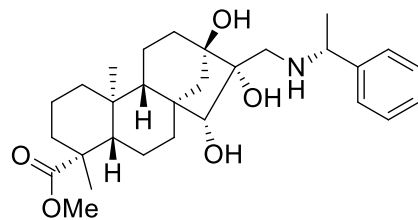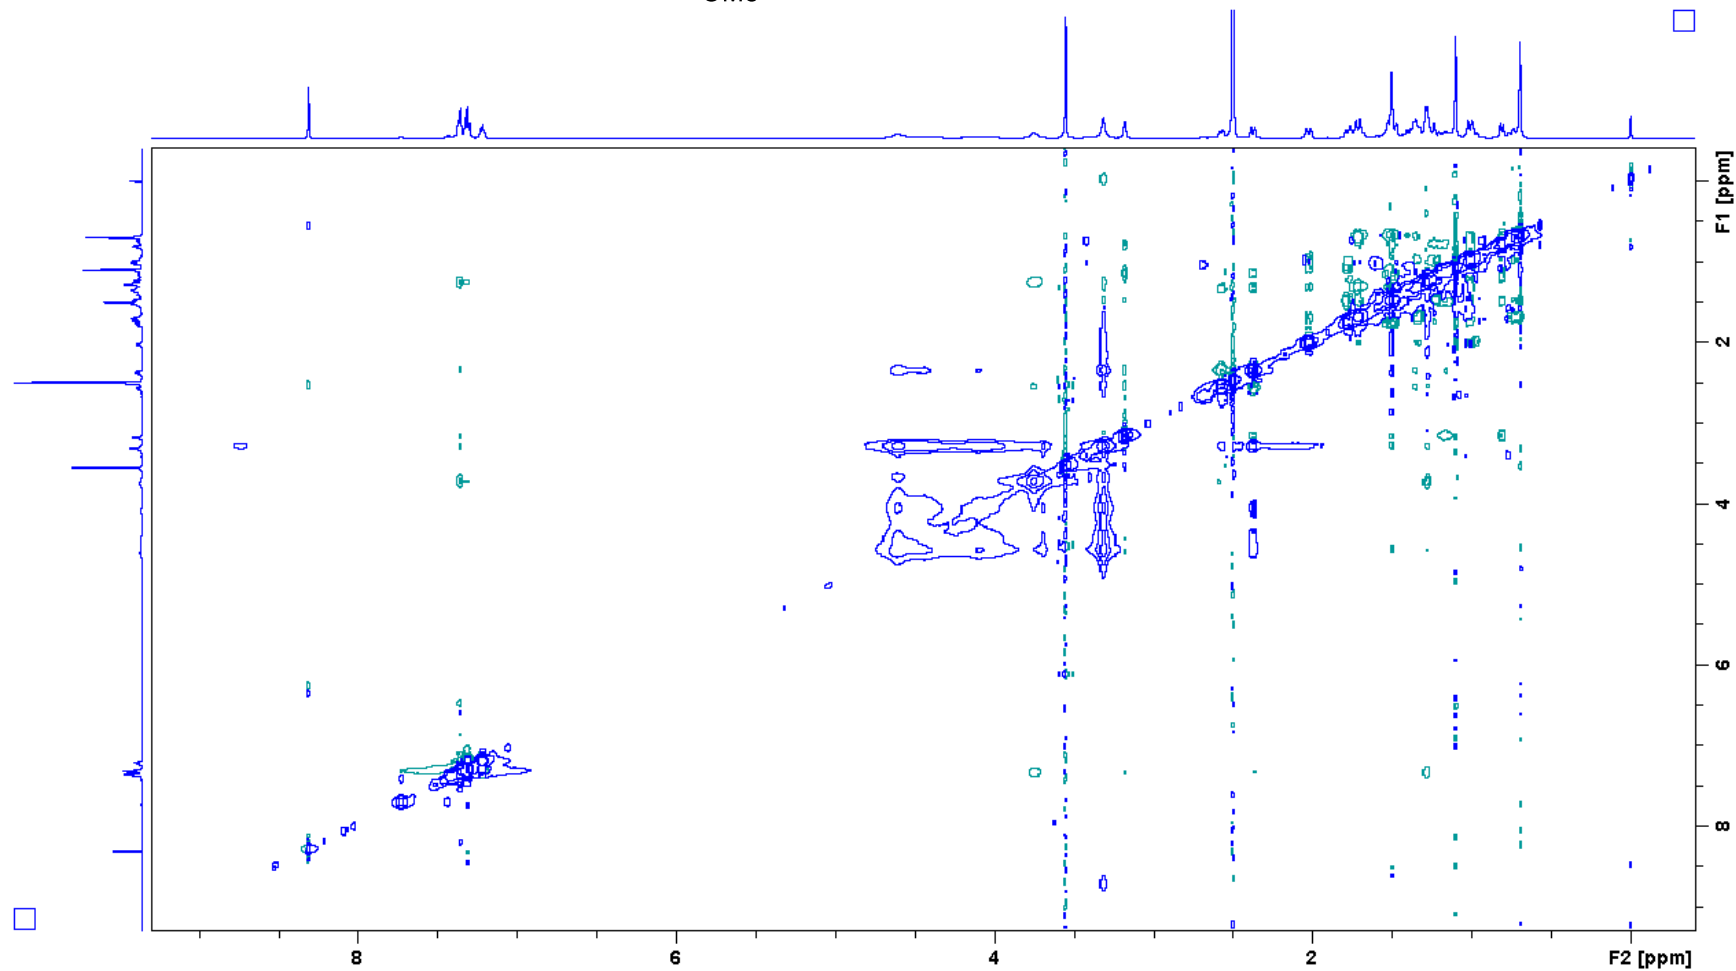

HSQC of compound (4*R*,6*aR*,7*R*,8*R*,9*S*,11*bS*)-methyl 7,8,9-trihydroxy-4,11*b*-dimethyl-8-(((*R*)-1-phenylethyl)amino)methyl)tetradecahydro-6*a*,9-methanocyclohepta[*a*]naphthalene-4-carboxylate (**7**)

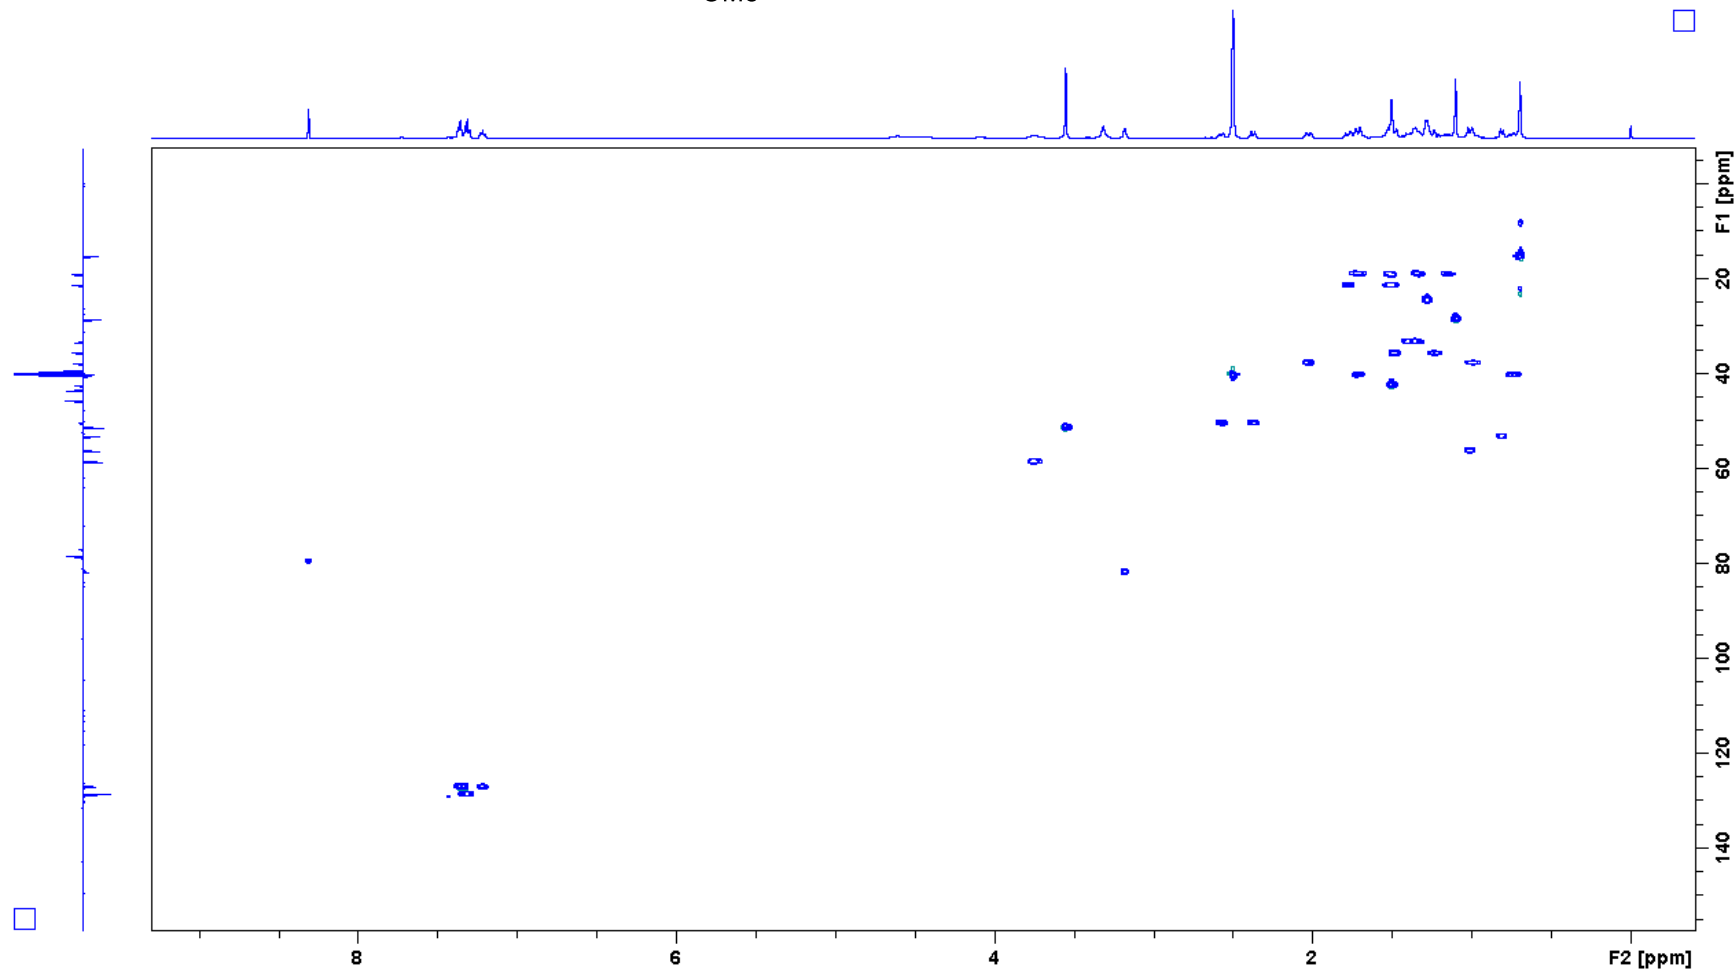



HMBC of compound (4*R*,6*aR*,7*R*,8*R*,9*S*,11*bS*)-methyl 7,8,9-trihydroxy-4,11*b*-dimethyl-8-(((*R*)-1-phenylethyl)amino)methyl)tetradecahydro-6*a*,9-methanocyclohepta[*a*]naphthalene-4-carboxylate (**7**)

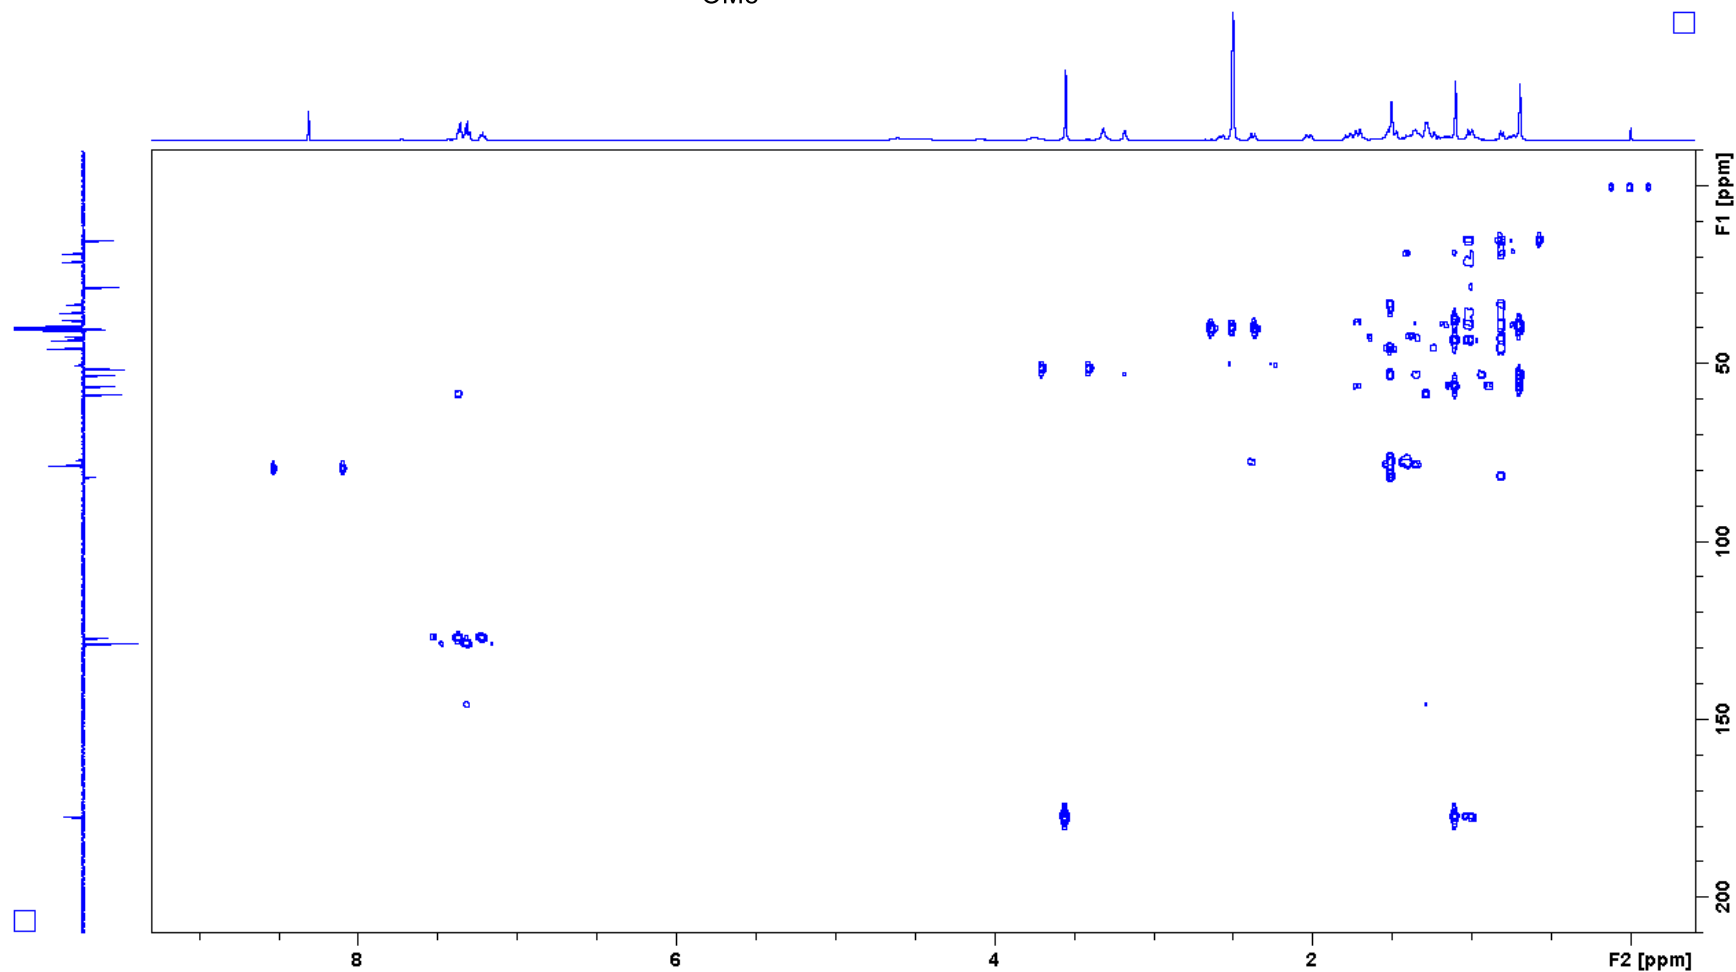

$^1\text{H}$ -NMR of compound (4*R*,6*aR*,7*R*,8*R*,9*S*,11*bS*)-methyl 7,8,9-trihydroxy-4,11*b*-dimethyl-8-(((*S*)-1-phenylethyl)amino)methyl)tetradecahydro-6*a*,9-methanocyclohepta[*a*]naphthalene-4-carboxylate (**8**)

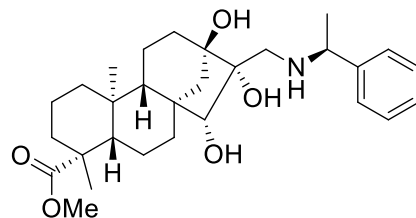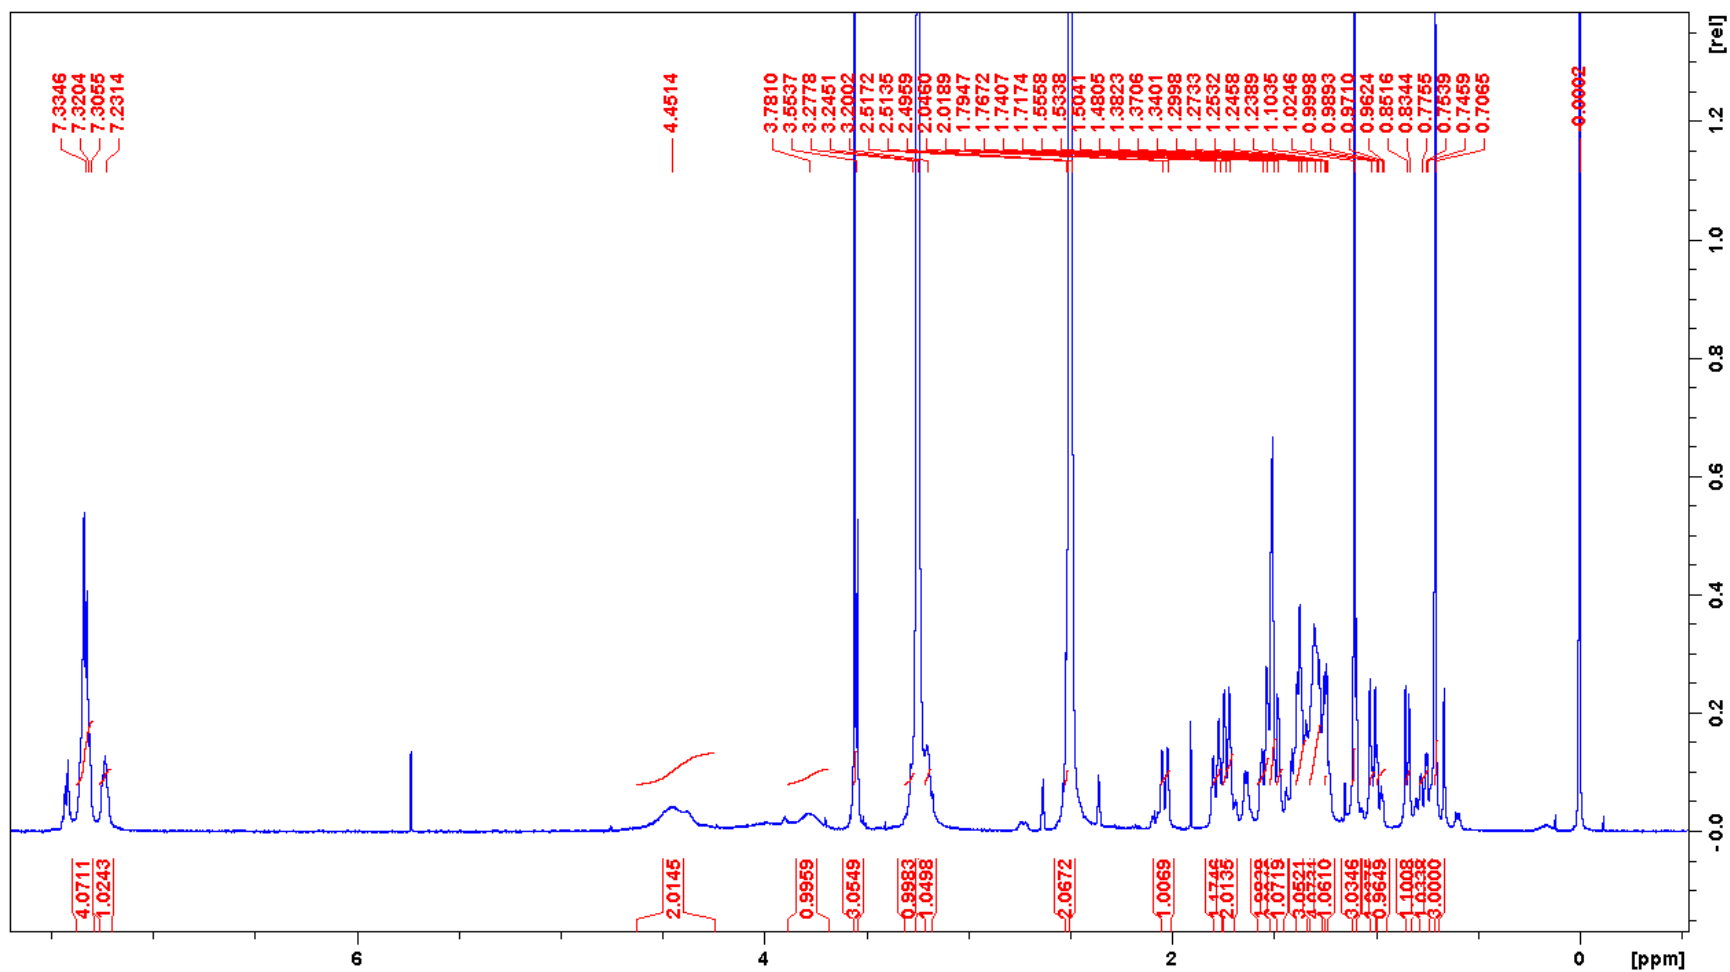

$^{13}\text{C}$ -NMR of compound (4*R*,6*aR*,7*R*,8*R*,9*S*,11*bS*)-methyl 7,8,9-trihydroxy-4,11*b*-dimethyl-8-(((*S*)-1-phenylethyl)amino)methyl)tetradecahydro-6*a*,9-methanocyclohepta[*a*]naphthalene-4-carboxylate (**8**)

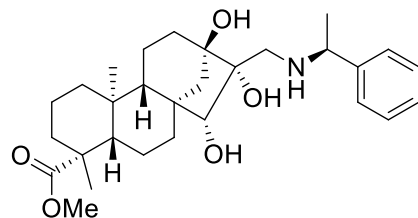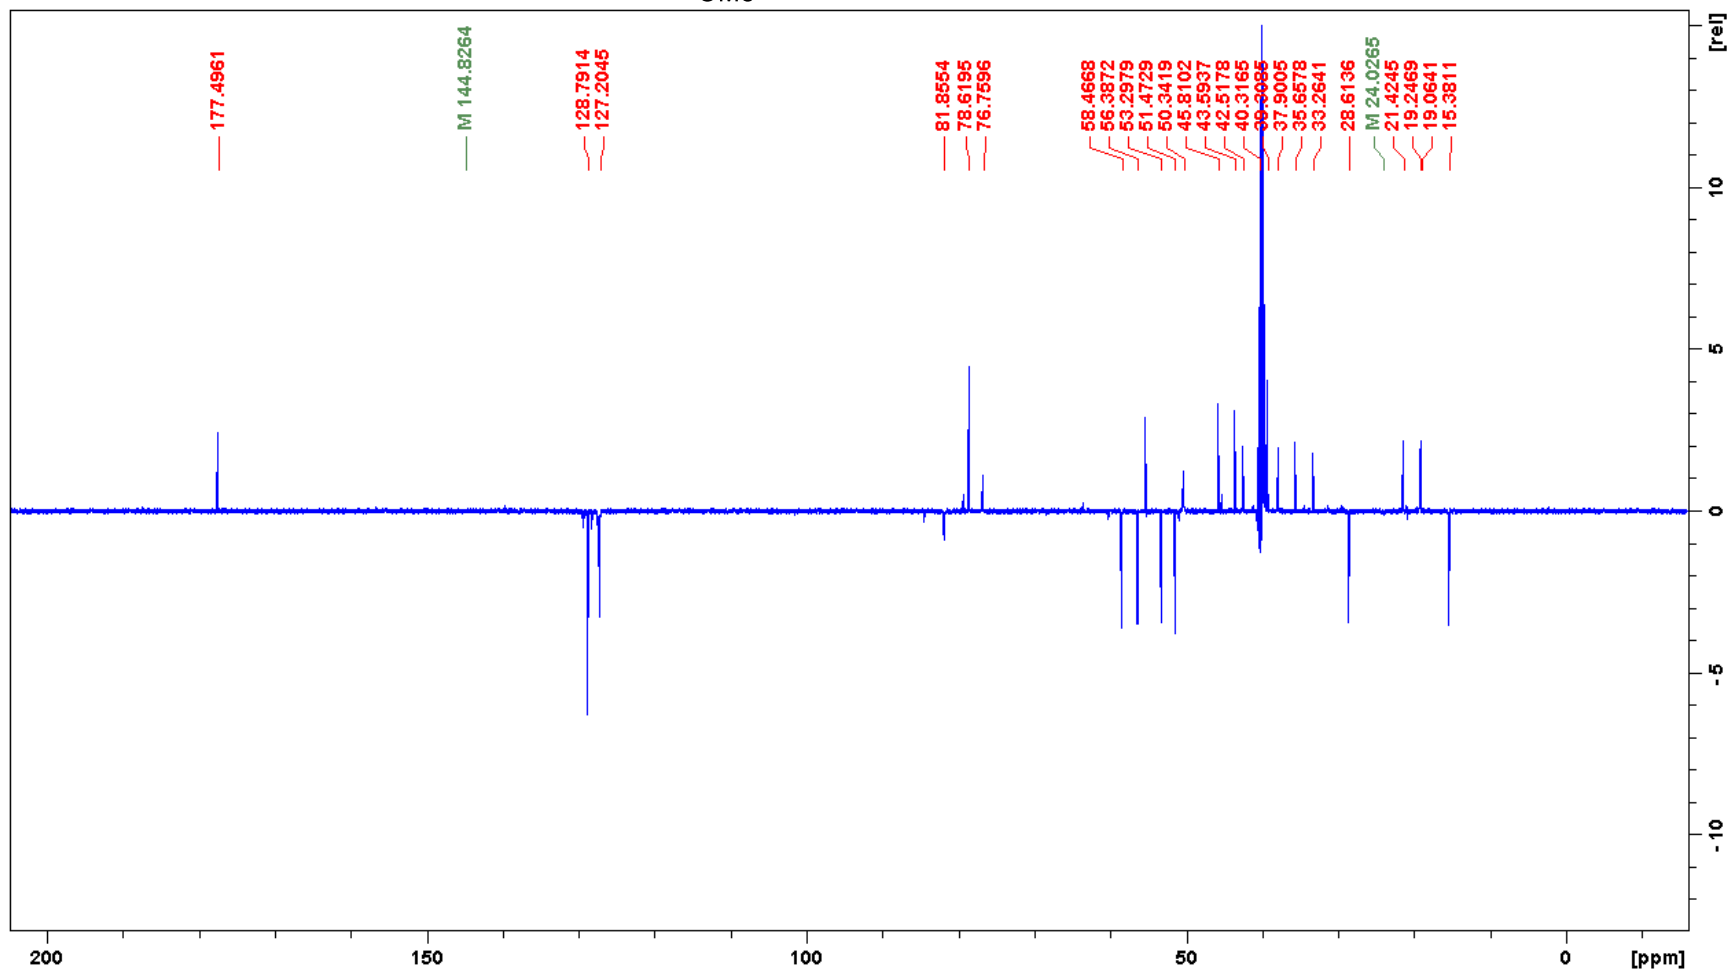

COSY of compound (4*R*,6*aR*,7*R*,8*R*,9*S*,11*bS*)-methyl 7,8,9-trihydroxy-4,11*b*-dimethyl-8-(((*S*)-1-phenylethyl)amino)methyl)tetradecahydro-6*a*,9-methanocyclohepta[*a*]naphthalene-4-carboxylate (**8**)

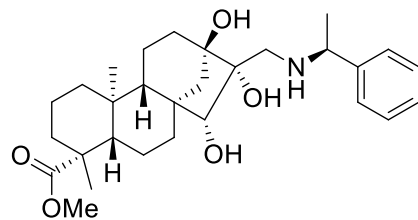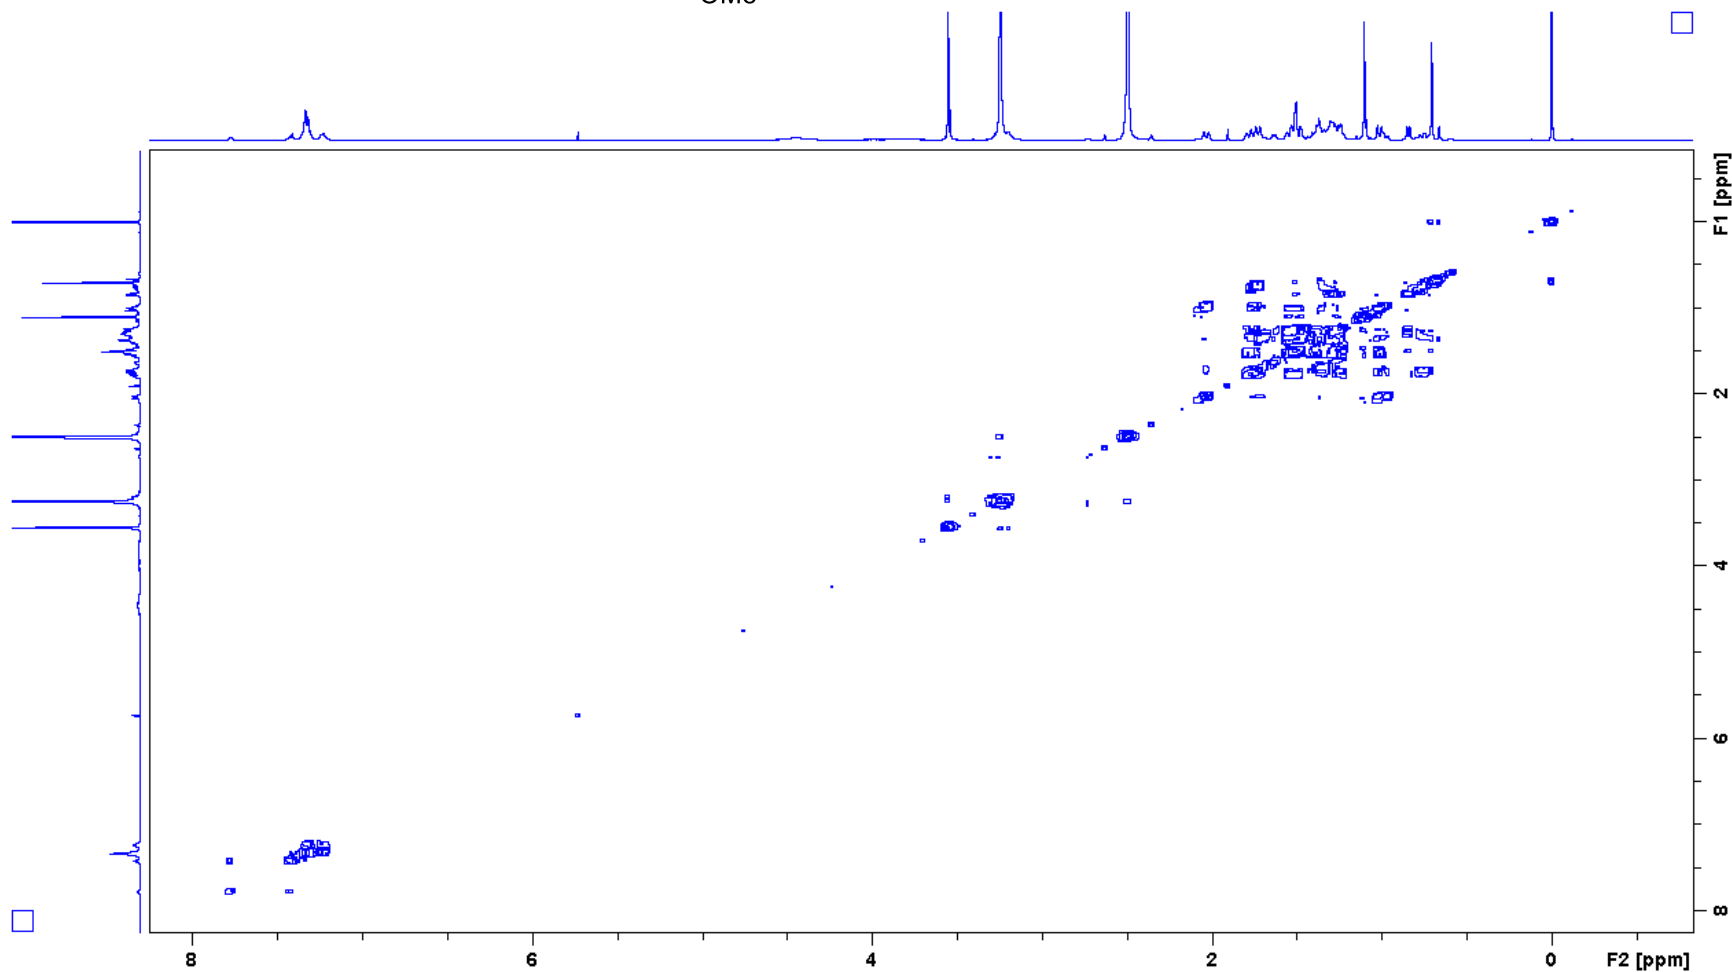

NOESY of compound (4*R*,6*aR*,7*R*,8*R*,9*S*,11*bS*)-methyl 7,8,9-trihydroxy-4,11*b*-dimethyl-8-(((*S*)-1-phenylethyl)amino)methyl)tetradecahydro-6*a*,9-methanocyclohepta[*a*]naphthalene-4-carboxylate (**8**)

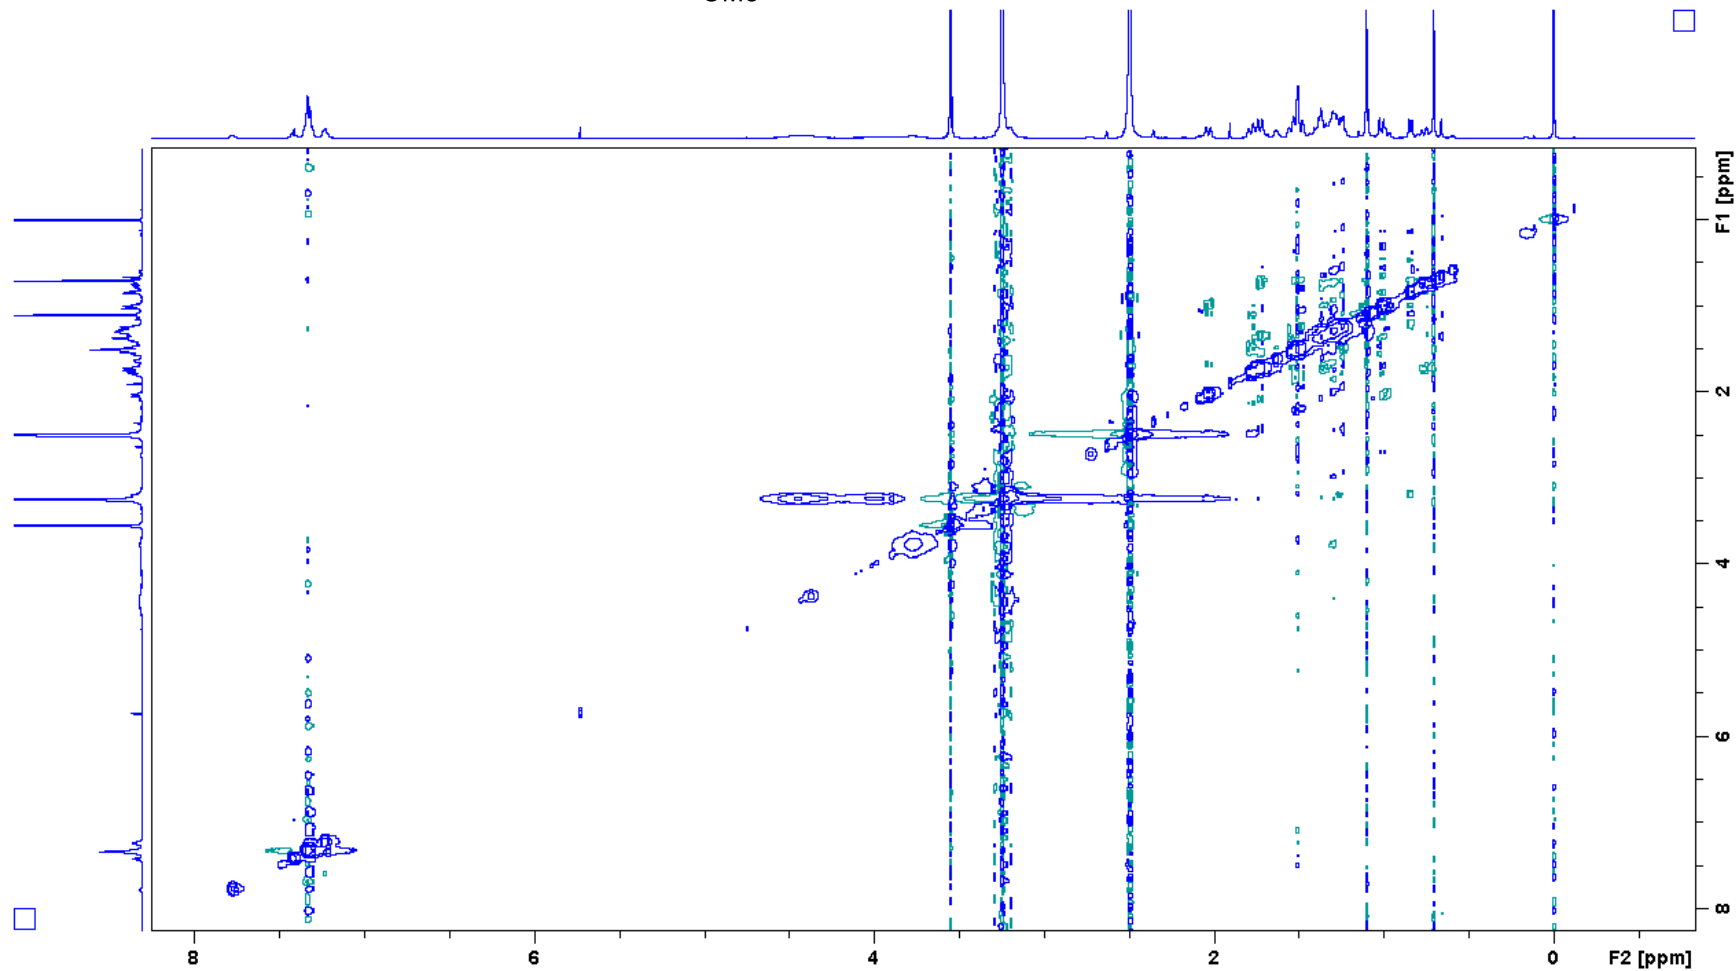

HSQC of compound (4*R*,6*aR*,7*R*,8*R*,9*S*,11*bS*)-methyl 7,8,9-trihydroxy-4,11*b*-dimethyl-8-(((*S*)-1-phenylethyl)amino)methyl)tetradecahydro-6*a*,9-methanocyclohepta[*a*]naphthalene-4-carboxylate (**8**)

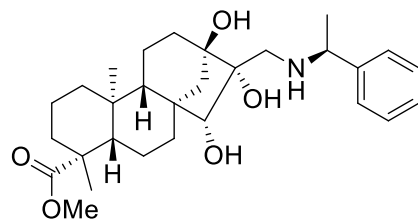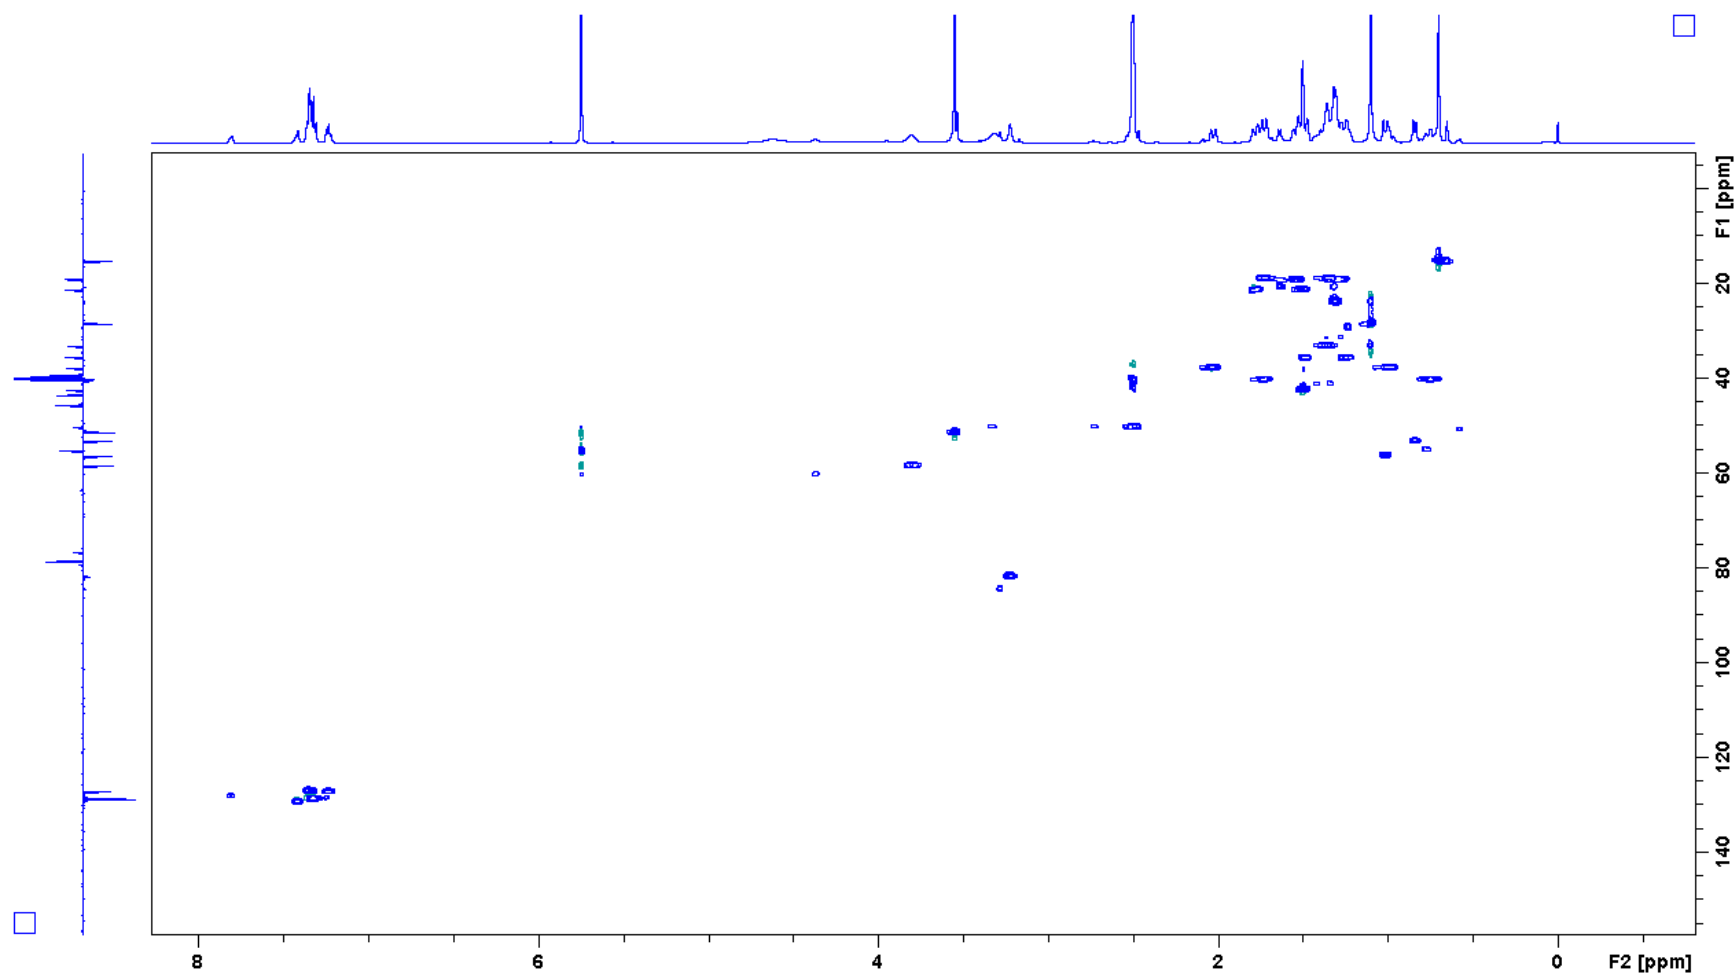

HMBC of compound (4*R*,6*aR*,7*R*,8*R*,9*S*,11*bS*)-methyl 7,8,9-trihydroxy-4,11*b*-dimethyl-8-((((*S*)-1-phenylethyl)amino)methyl)tetradecahydro-6*a*,9-methanocyclohepta[*a*]naphthalene-4-carboxylate (**8**)

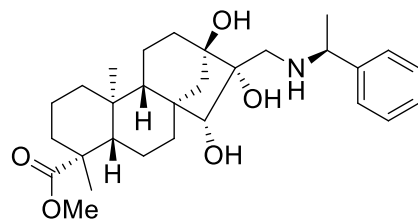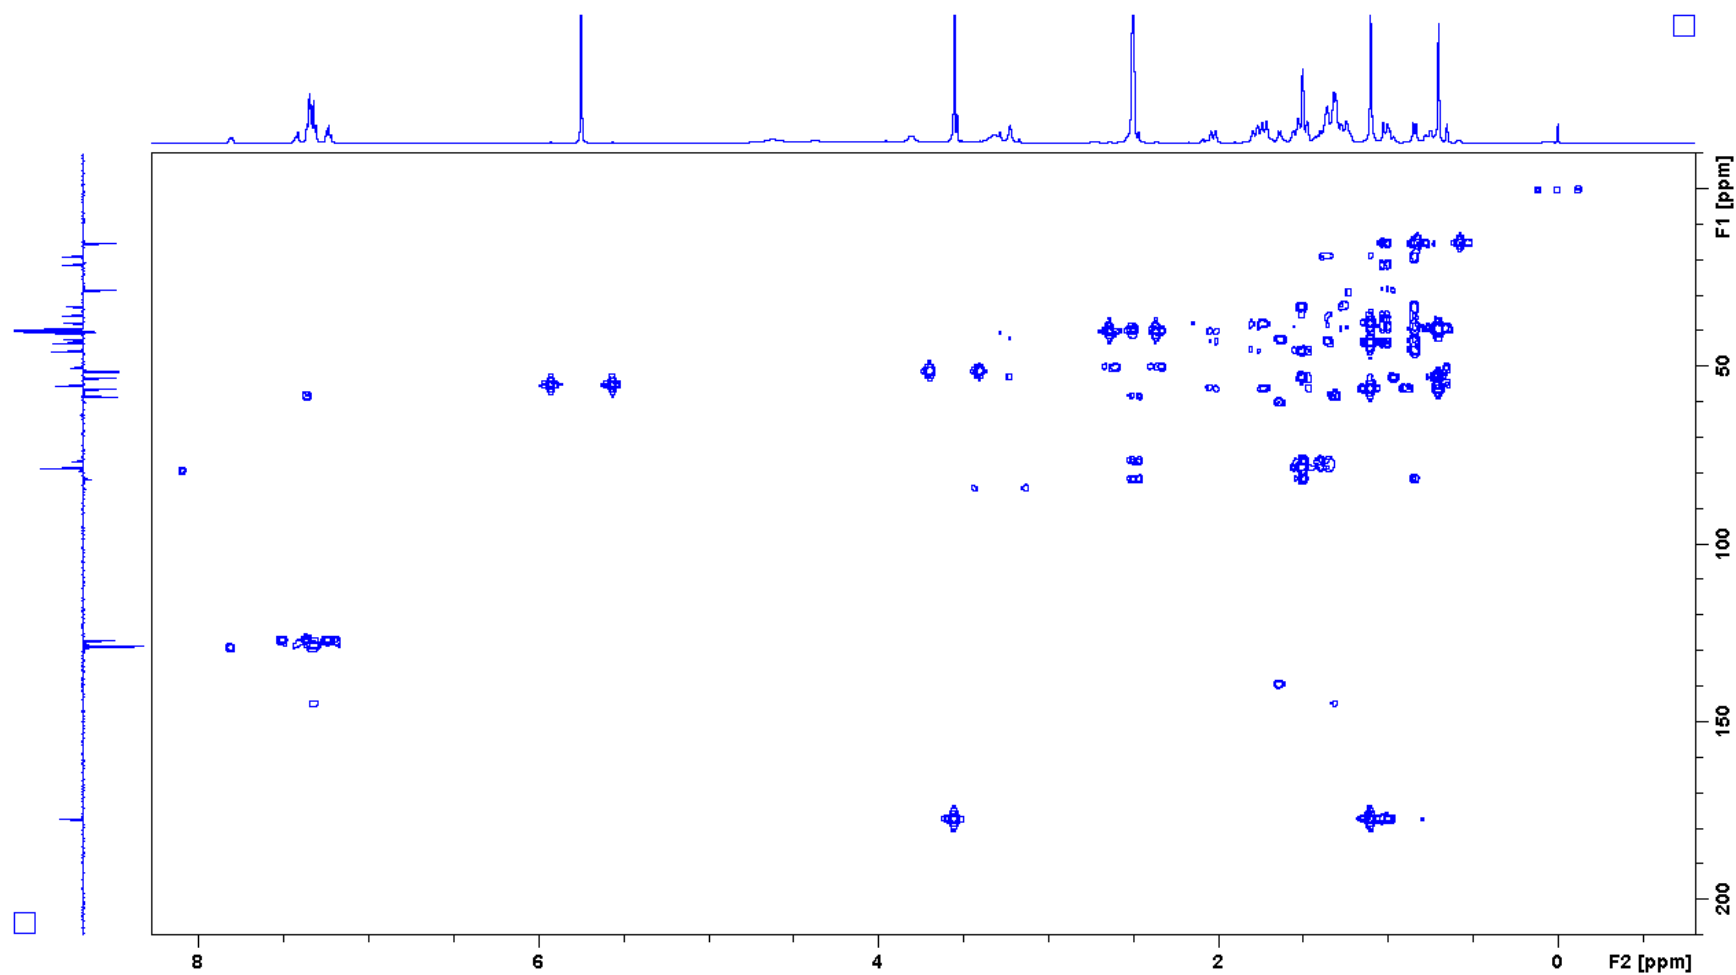

$^1\text{H}$ -NMR of compound (4*R*,6*aR*,7*R*,8*R*,9*S*,11*bS*)-methyl 8-(((4-fluorobenzyl)amino)methyl)-7,8,9-trihydroxy-4,11*b*-dimethyltetradecahydro-6*a*,9-methanocyclohepta[*a*]naphthalene-4-carboxylate (**9**)

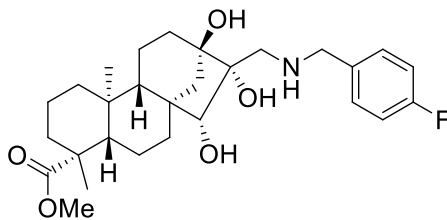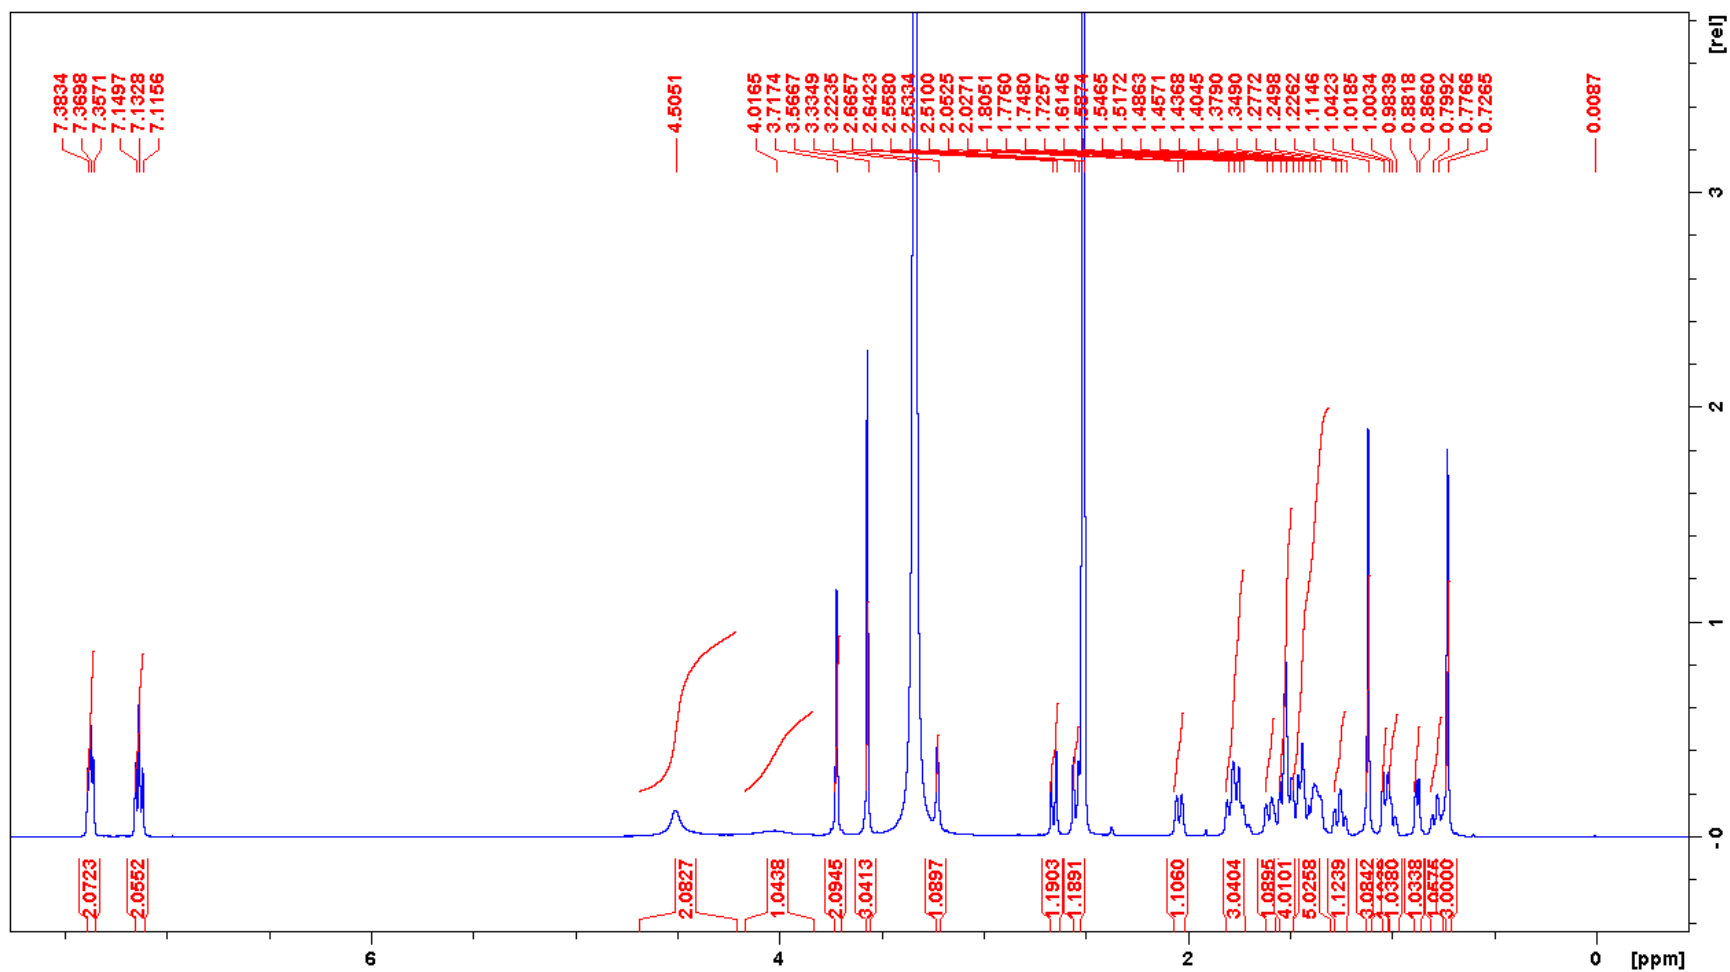



$^{13}\text{C}$ -NMR of compound (4*R*,6*aR*,7*R*,8*R*,9*S*,11*bS*)-methyl 8-(((4-fluorobenzyl)amino)methyl)-7,8,9-trihydroxy-4,11b-dimethyltetradecahydro-6*a*,9-methanocyclohepta[*a*]naphthalene-4-carboxylate (**9**)

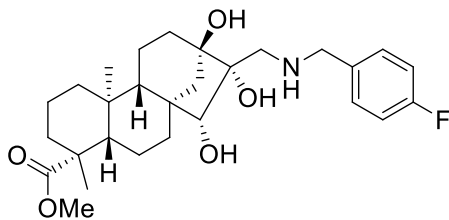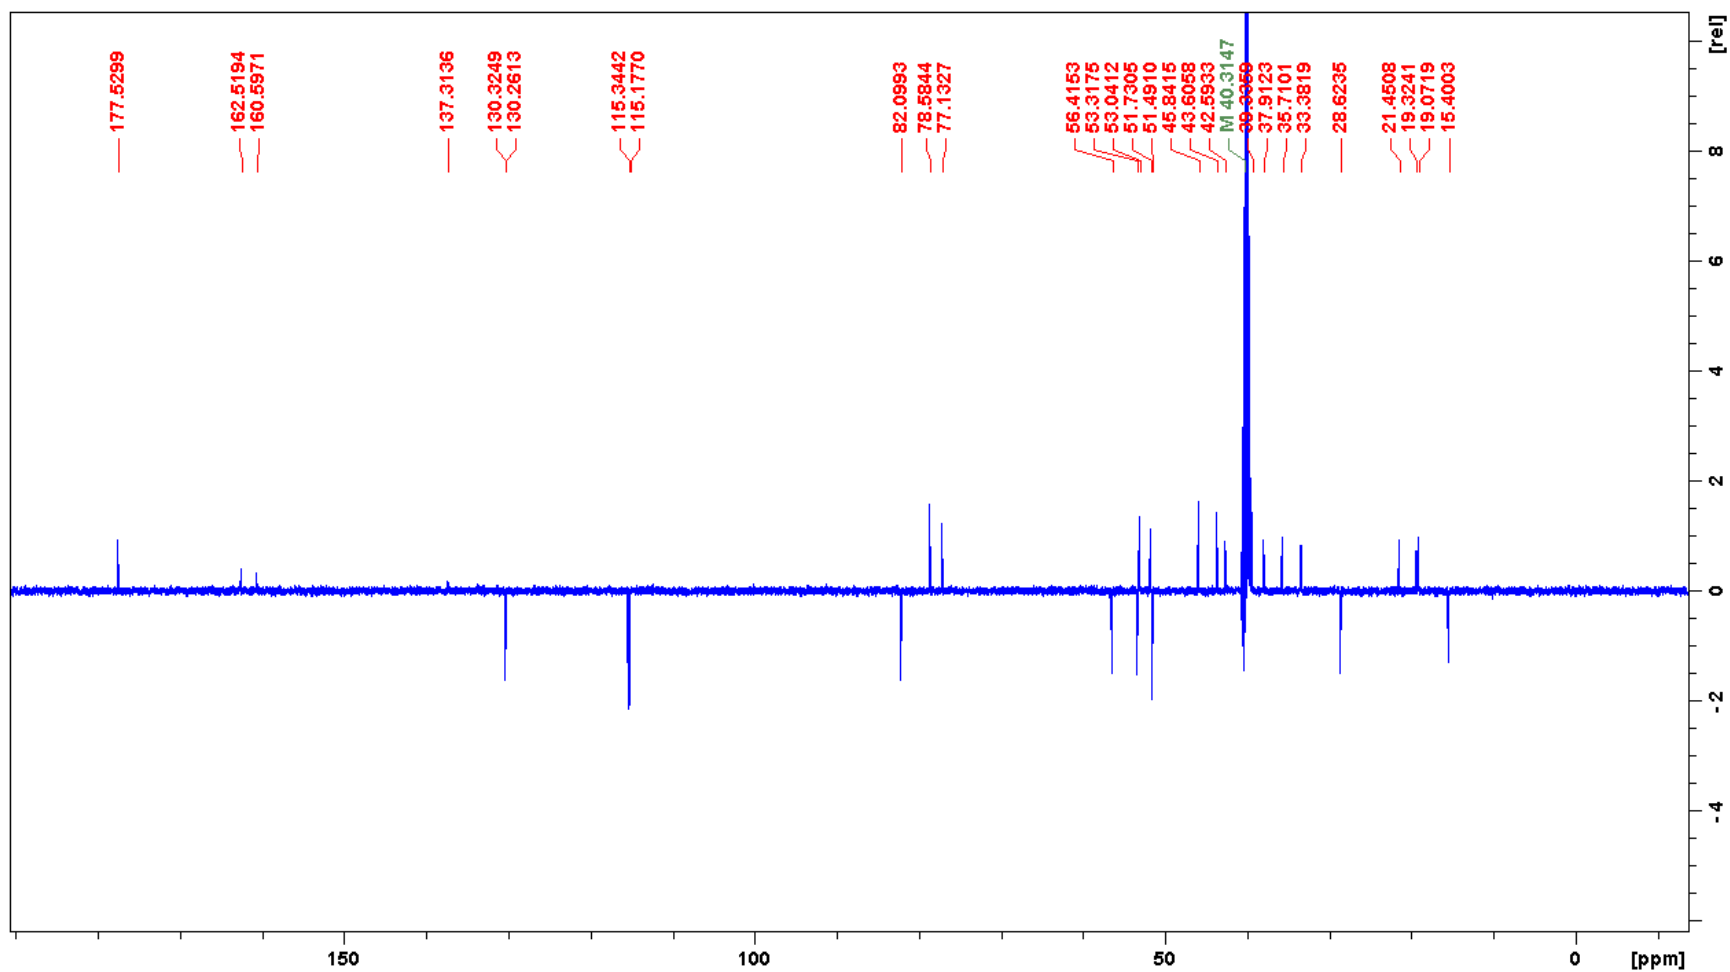

COSY of compound (4*R*,6*aR*,7*R*,8*R*,9*S*,11*bS*)-methyl 8-(((4-fluorobenzyl)amino)methyl)-7,8,9-trihydroxy-4,11b-dimethyltetradecahydro-6*a*,9-methanocyclohepta[*a*]naphthalene-4-carboxylate (**9**)

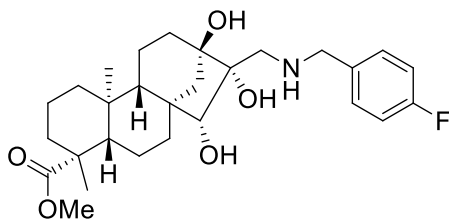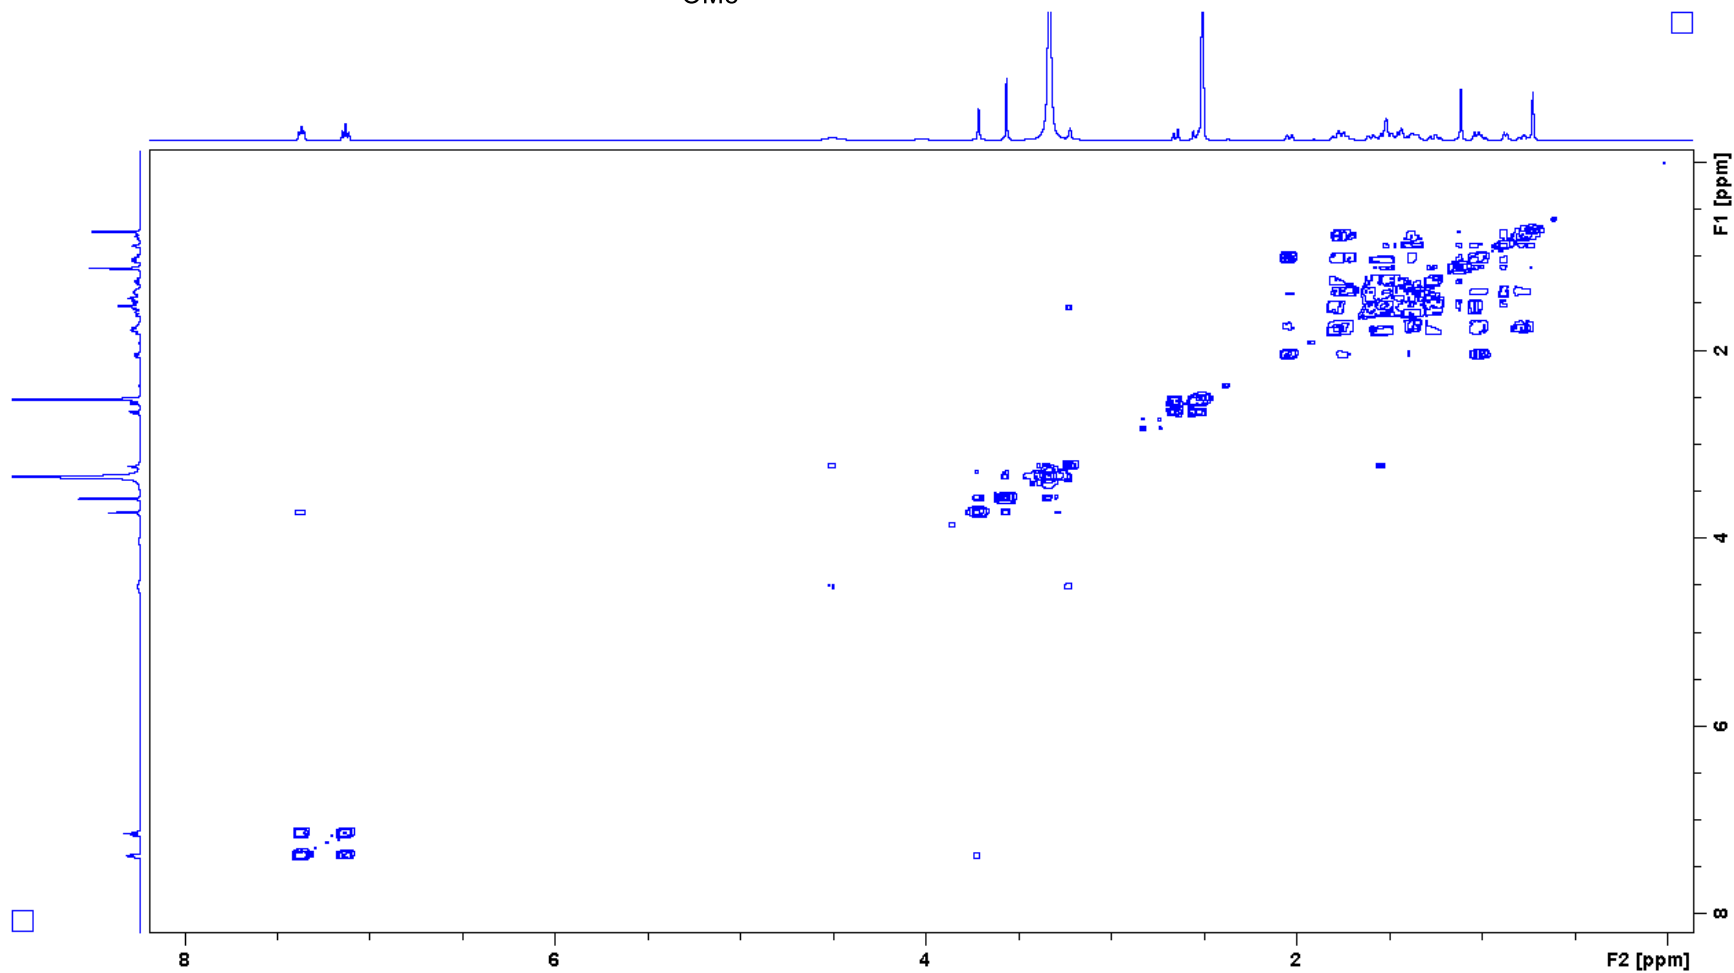

NOESY of compound (4*R*,6*aR*,7*R*,8*R*,9*S*,11*bS*)-methyl 8-(((4-fluorobenzyl)amino)methyl)-7,8,9-trihydroxy-4,11*b*-dimethyltetradecahydro-6*a*,9-methanocyclohepta[*a*]naphthalene-4-carboxylate (**9**)

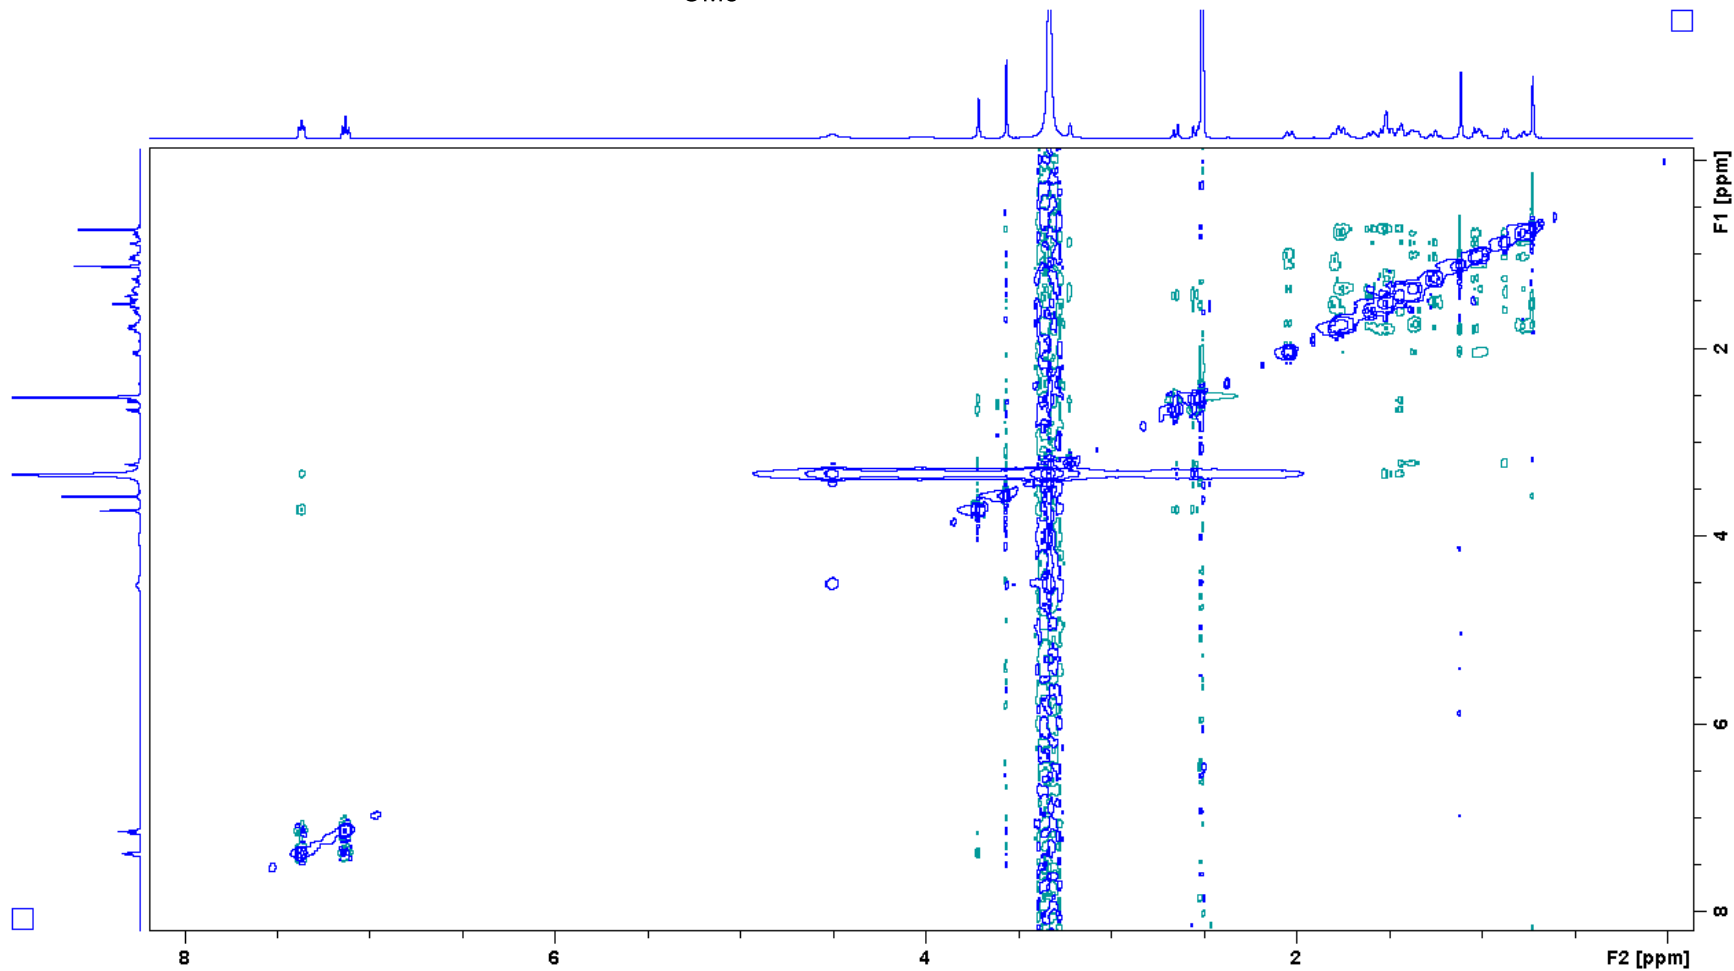

HSQC of compound (4*R*,6*aR*,7*R*,8*R*,9*S*,11*bS*)-methyl 8-(((4-fluorobenzyl)amino)methyl)-7,8,9-trihydroxy-4,11b-dimethyltetradecahydro-6*a*,9-methanocyclohepta[*a*]naphthalene-4-carboxylate (**9**)

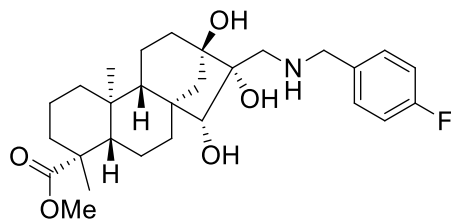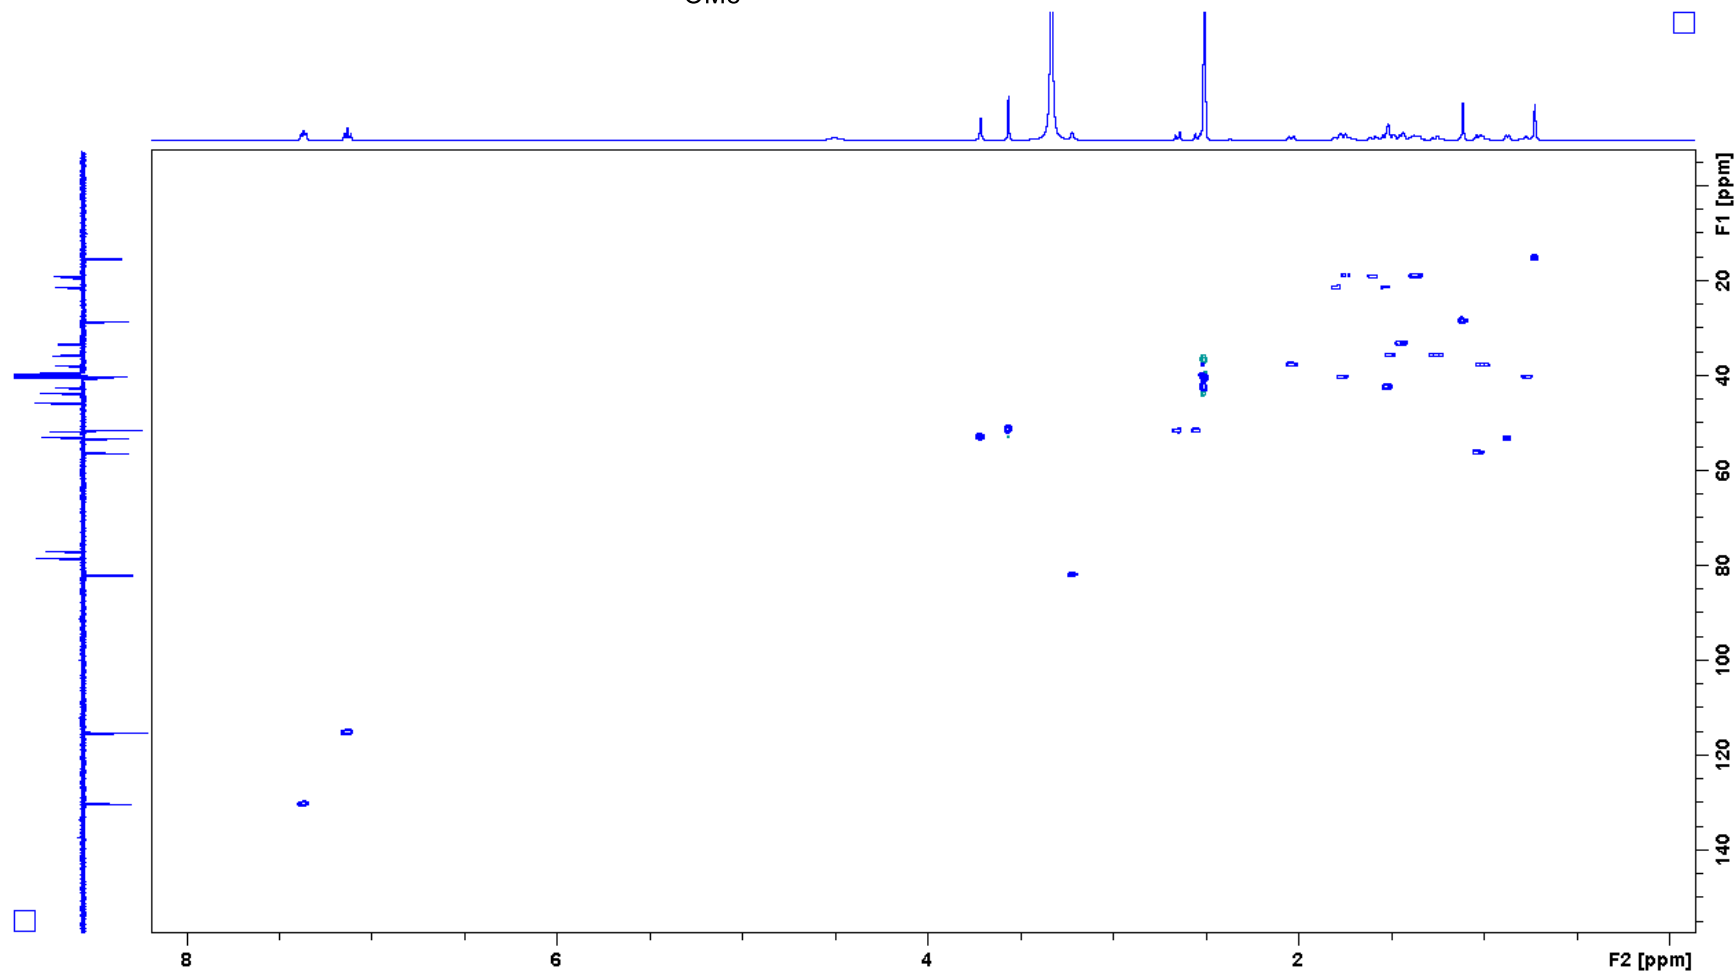

HMBC of compound (4*R*,6*aR*,7*R*,8*R*,9*S*,11*bS*)-methyl 8-(((4-fluorobenzyl)amino)methyl)-7,8,9-trihydroxy-4,11b-dimethyltetradecahydro-6*a*,9-methanocyclohepta[*a*]naphthalene-4-carboxylate (**9**)

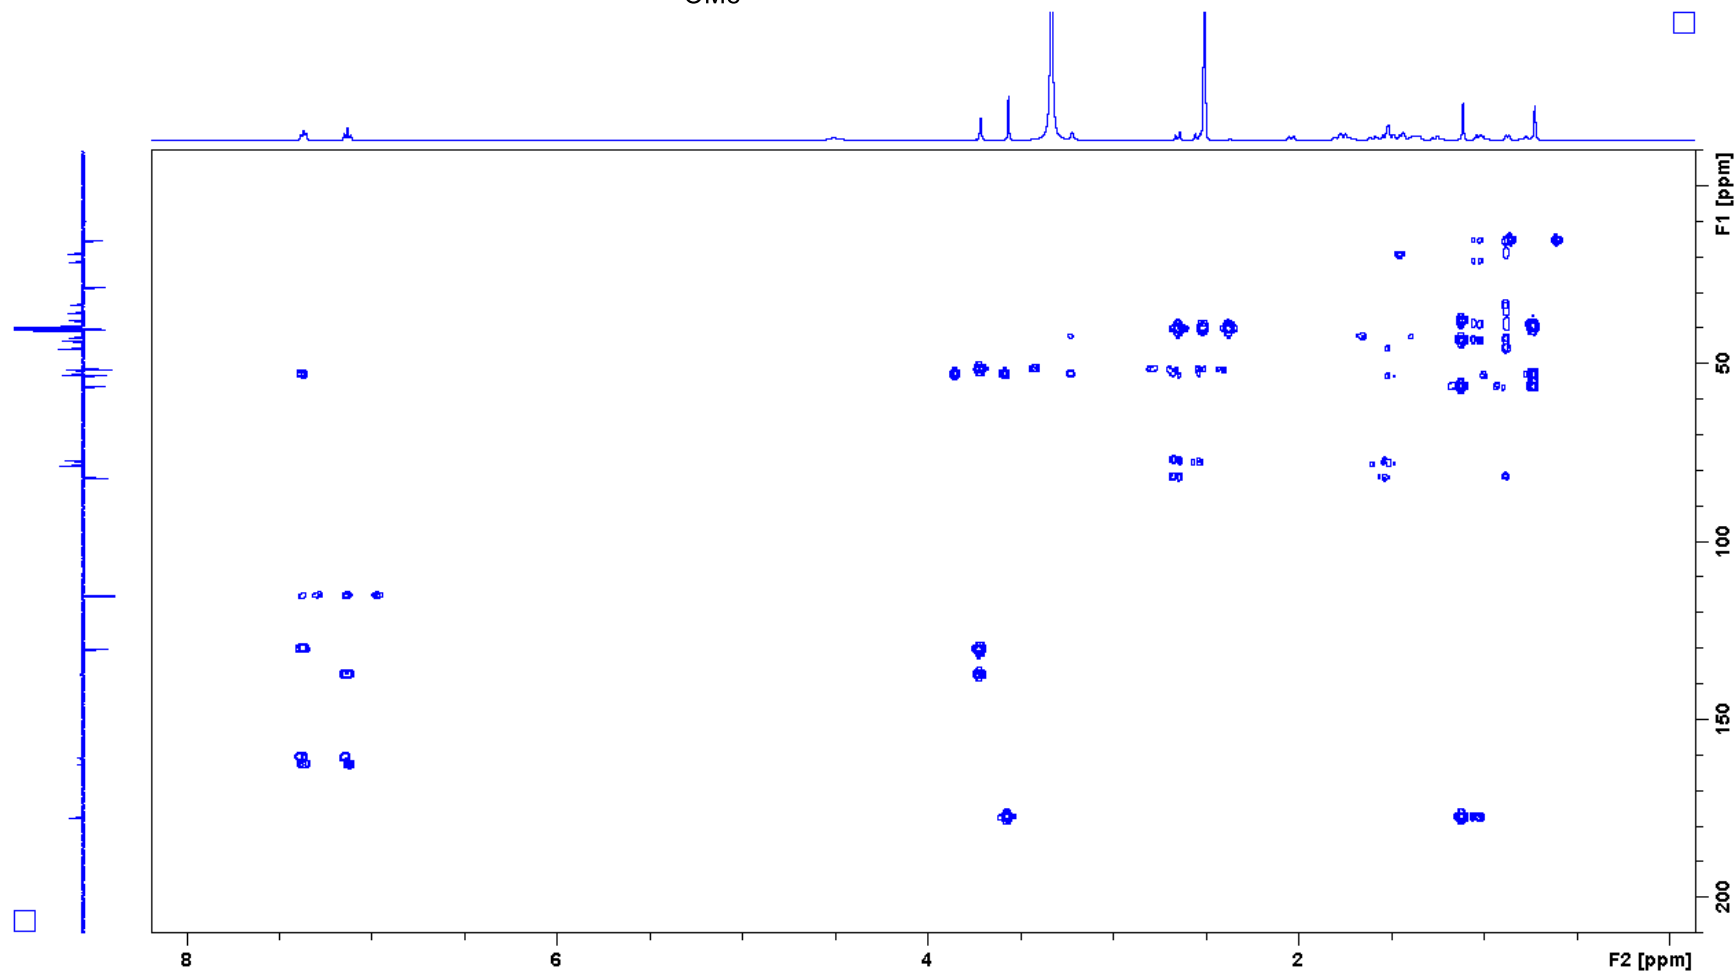

$^{19}\text{F}$ -NMR of compound (4*R*,6*aR*,7*R*,8*R*,9*S*,11*bS*)-methyl 8-(((4-fluorobenzyl)amino)methyl)-7,8,9-trihydroxy-4,11b-dimethyltetradecahydro-6*a*,9-methanocyclohepta[*a*]naphthalene-4-carboxylate (**9**)

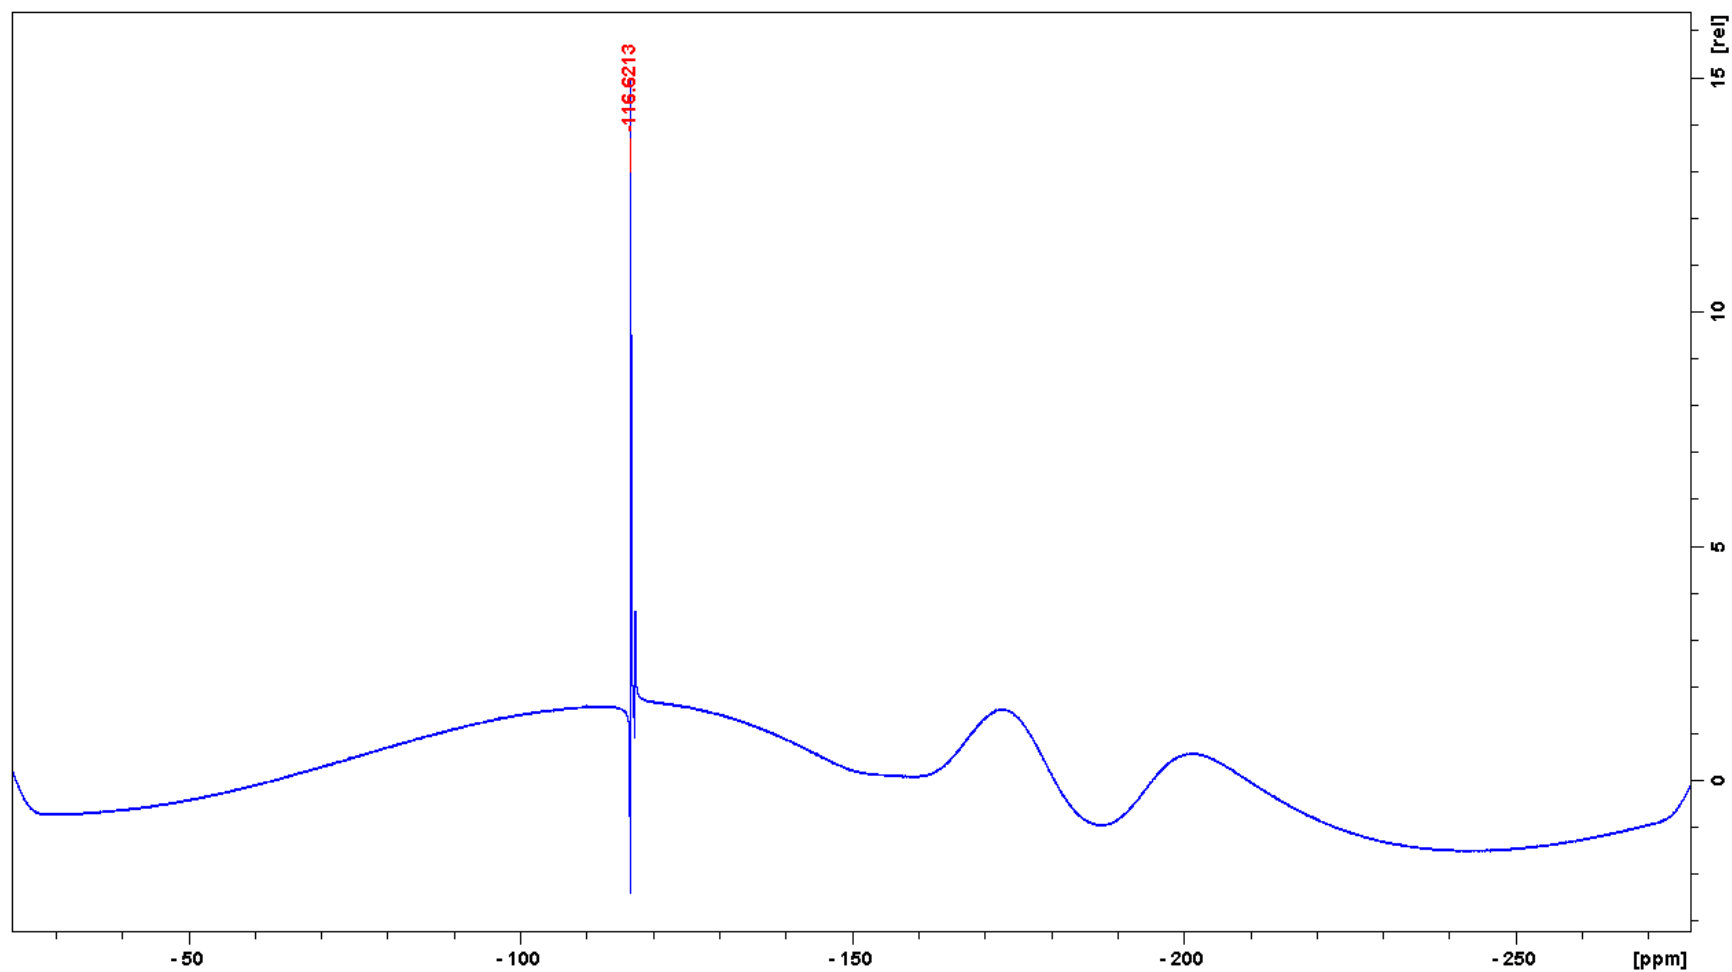

$^1\text{H}$ -NMR of compound (4*R*,6*aR*,7*R*,8*R*,9*S*,11*bS*)-methyl 7,8,9-trihydroxy-8-(((4-methoxybenzyl)amino)methyl)-4,11b-dimethyltetradecahydro-6*a*,9-methanocyclohepta[*a*]naphthalene-4-carboxylate (**10**)

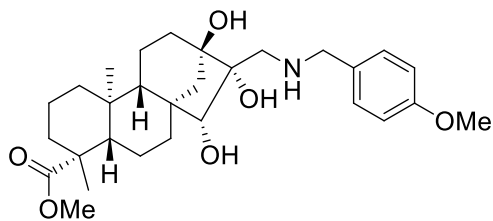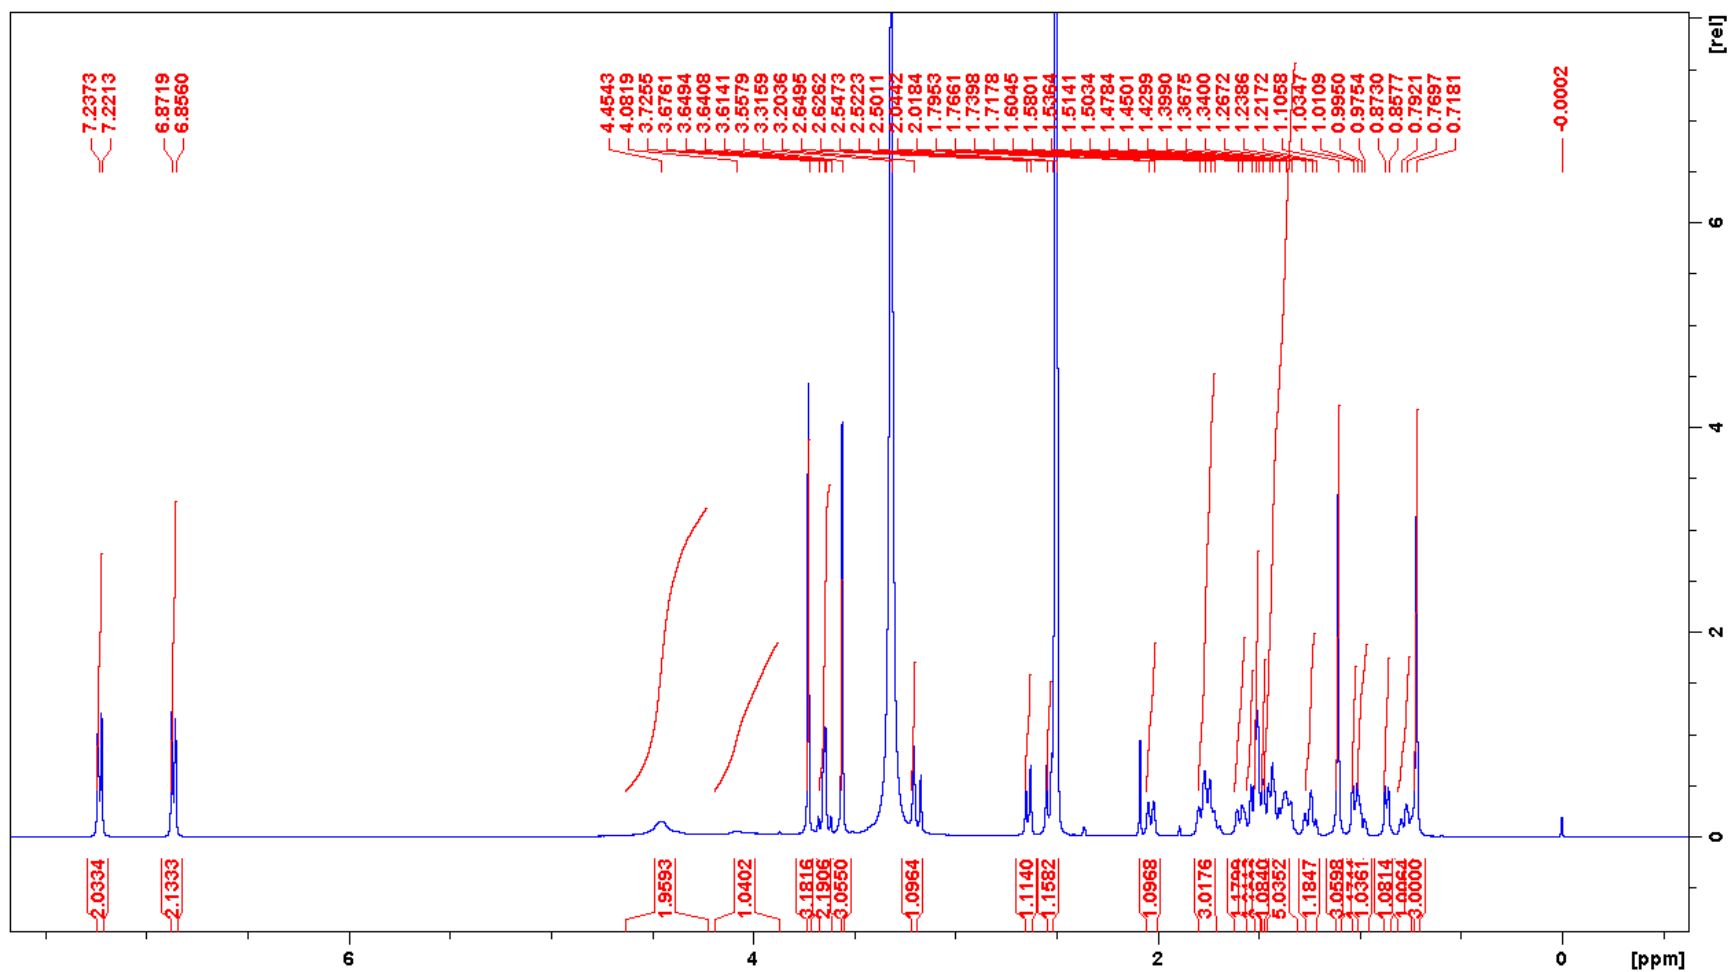

$^{13}\text{C}$ -NMR of compound (4*R*,6*aR*,7*R*,8*R*,9*S*,11*bS*)-methyl 7,8,9-trihydroxy-8-(((4-methoxybenzyl)amino)methyl)-4,11b-dimethyltetradecahydro-6*a*,9-methanocyclohepta[*a*]naphthalene-4-carboxylate (**10**)

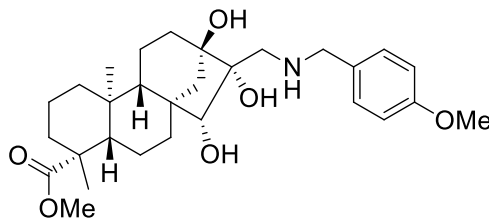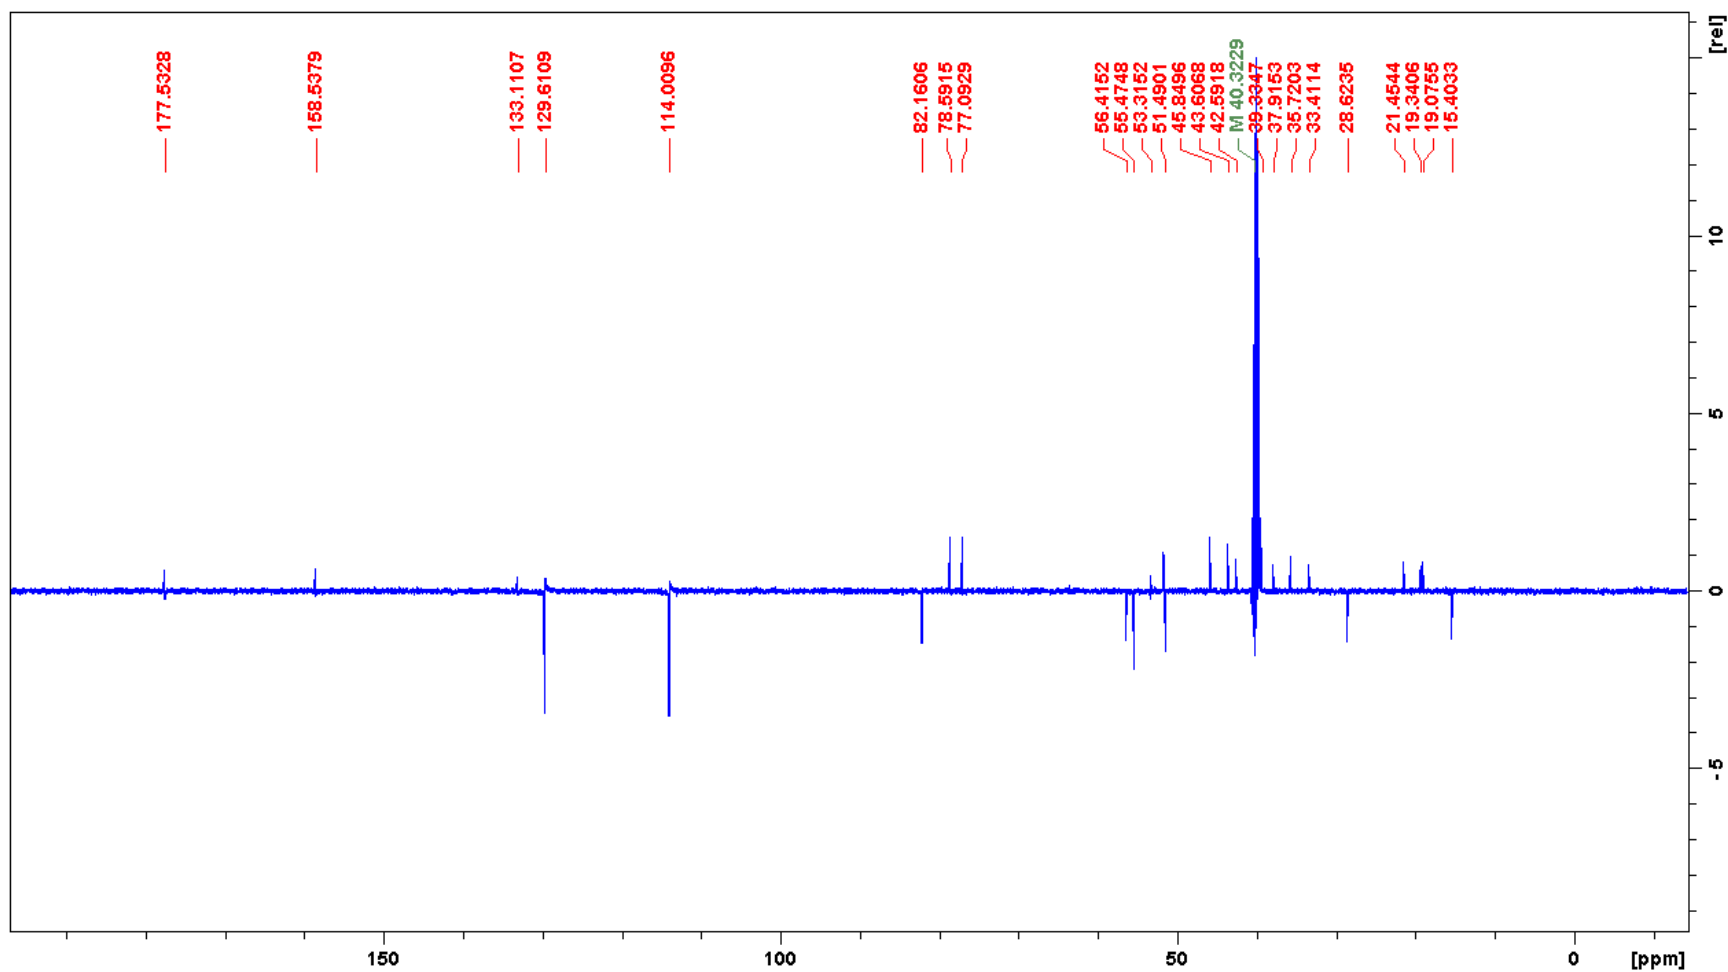



COSY of compound (4*R*,6*aR*,7*R*,8*R*,9*S*,11*bS*)-methyl 7,8,9-trihydroxy-8-(((4-methoxybenzyl)amino)methyl)-4,11b-dimethyltetradecahydro-6*a*,9-methanocyclohepta[*a*]naphthalene-4-carboxylate (**10**)

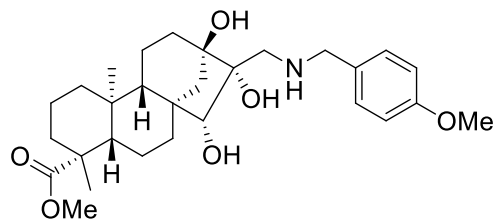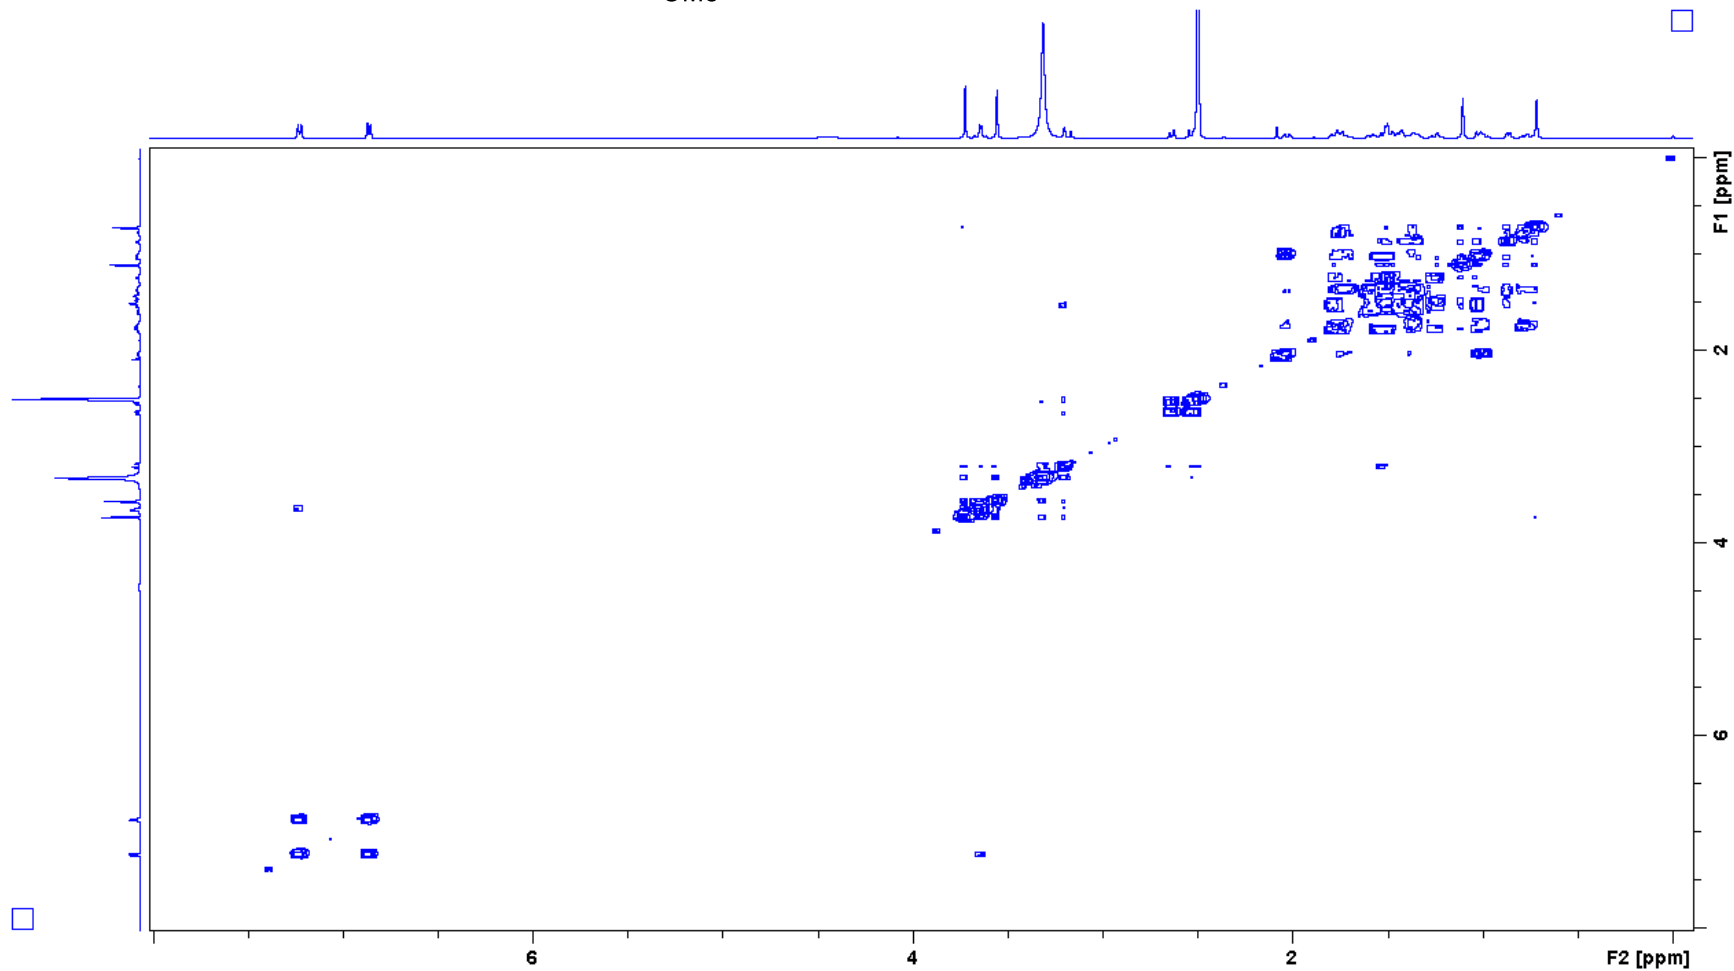

NOESY of compound (4*R*,6*aR*,7*R*,8*R*,9*S*,11*bS*)-methyl 7,8,9-trihydroxy-8-(((4-methoxybenzyl)amino)methyl)-4,11b-dimethyltetradecahydro-6*a*,9-methanocyclohepta[*a*]naphthalene-4-carboxylate (**10**)

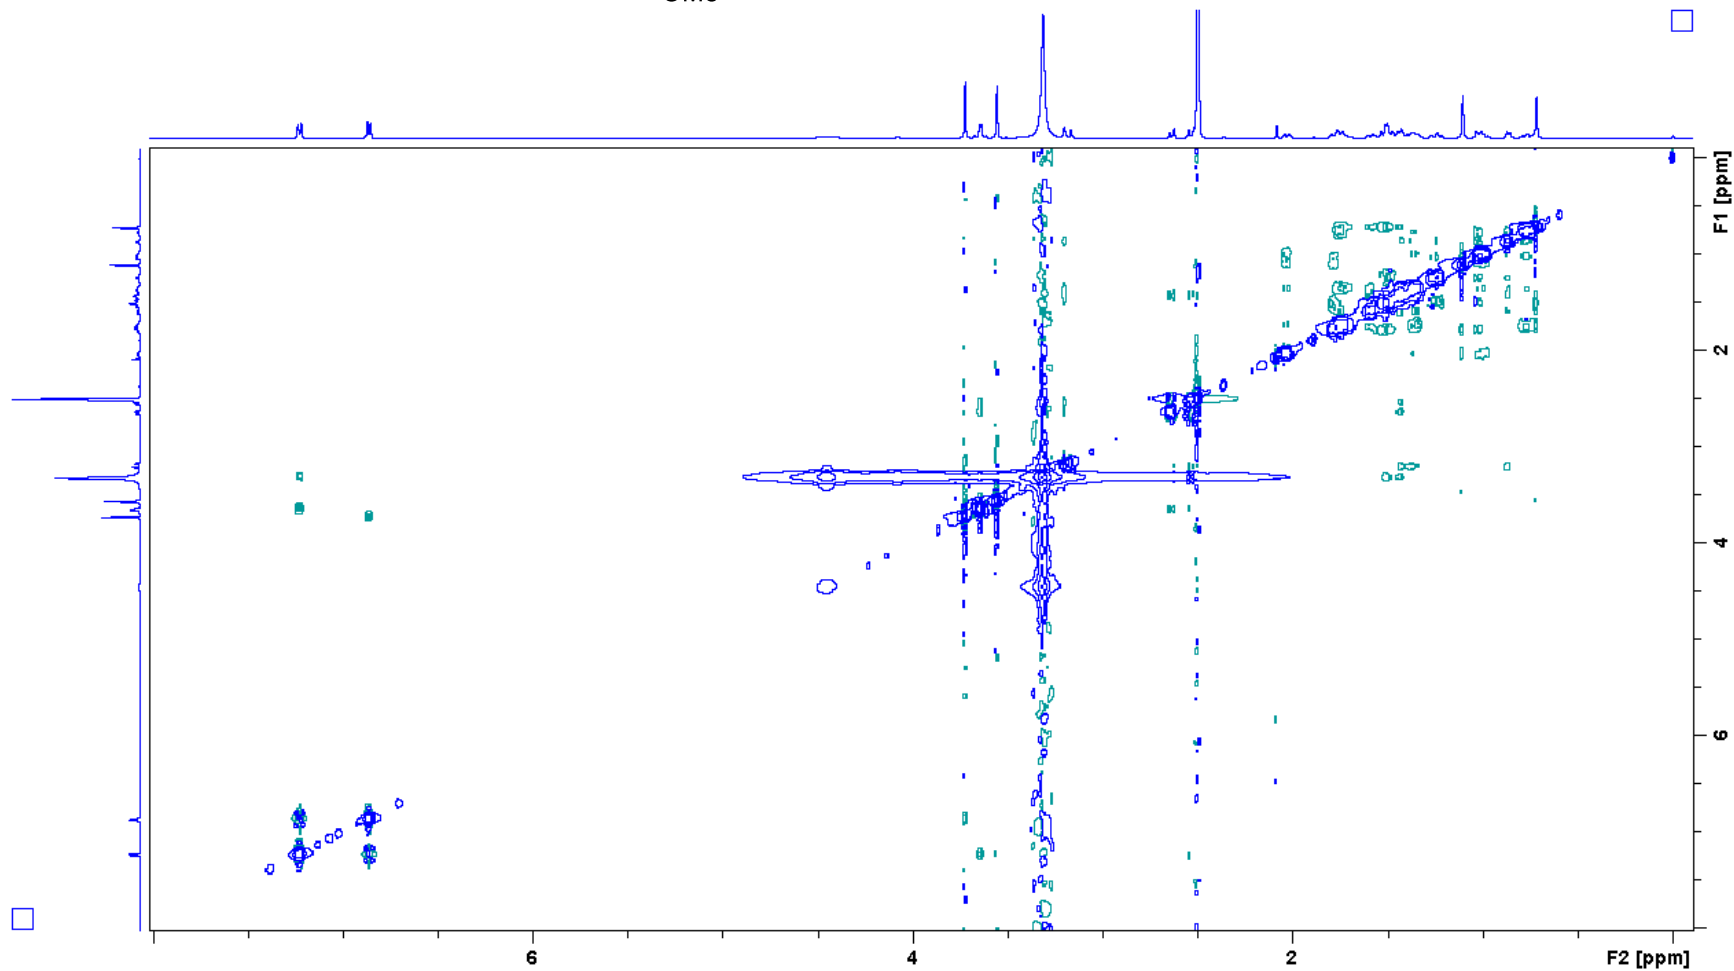

HSQC of compound (4*R*,6*aR*,7*R*,8*R*,9*S*,11*bS*)-methyl 7,8,9-trihydroxy-8-(((4-methoxybenzyl)amino)methyl)-4,11b-dimethyltetradecahydro-6*a*,9-methanocyclohepta[*a*]naphthalene-4-carboxylate (**10**)

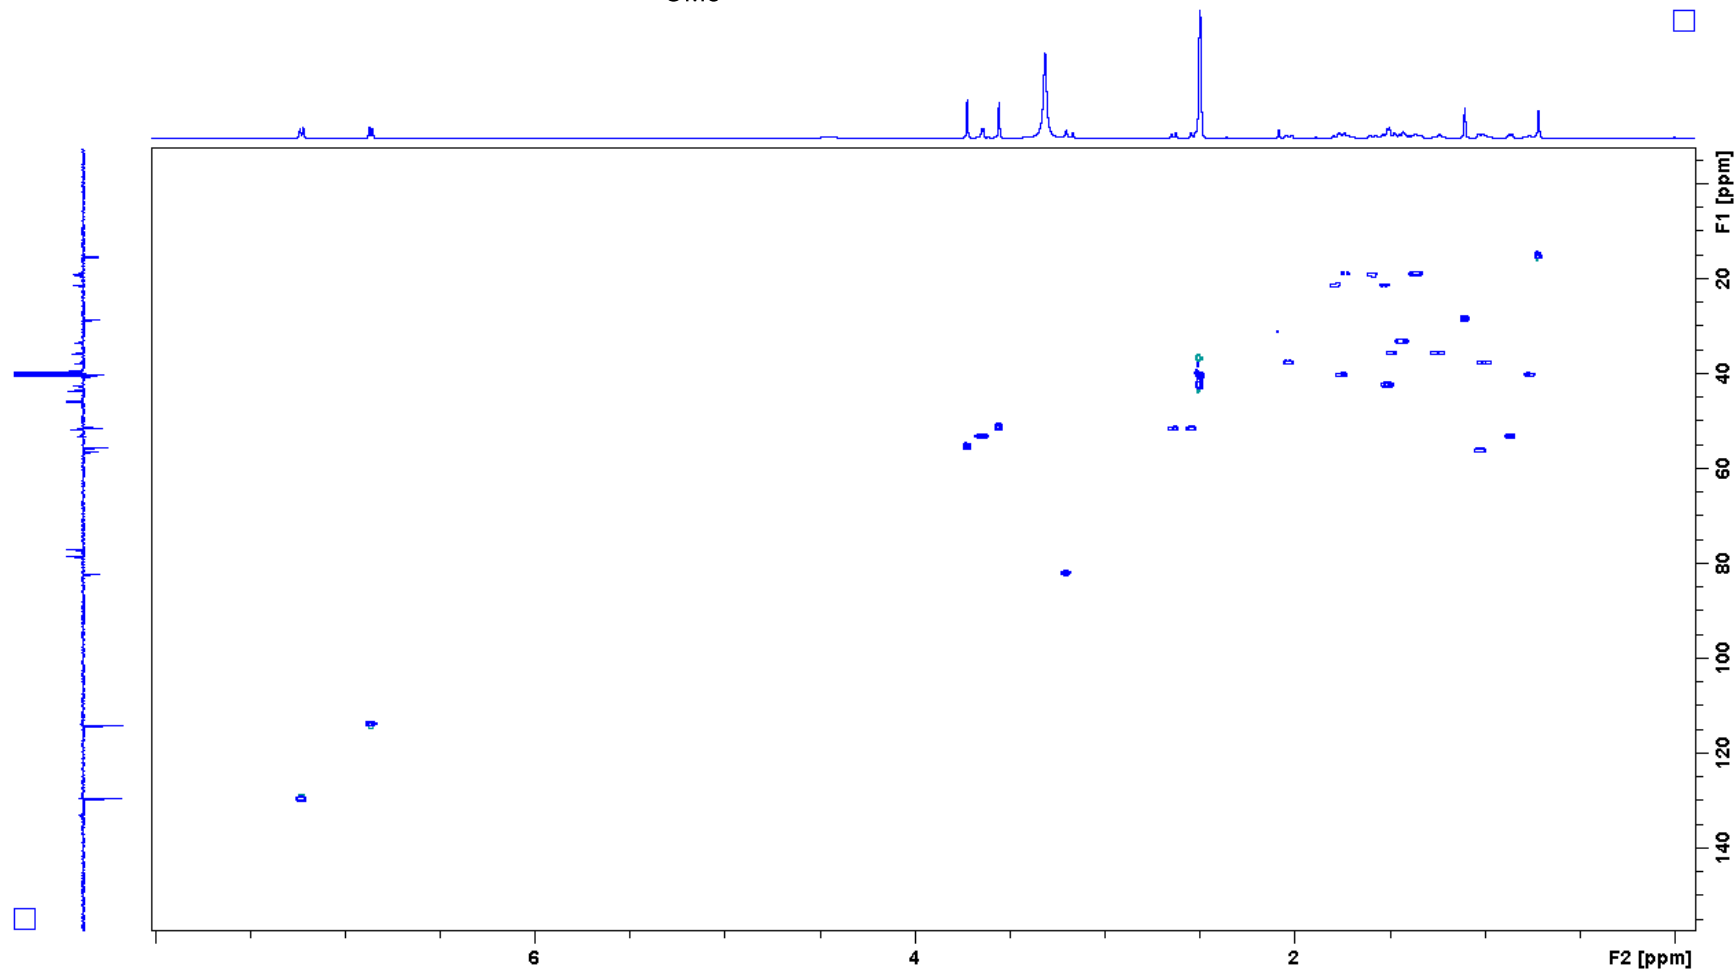

HMBC of compound (4*R*,6*aR*,7*R*,8*R*,9*S*,11*bS*)-methyl 7,8,9-trihydroxy-8-(((4-methoxybenzyl)amino)methyl)-4,11b-dimethyltetradecahydro-6*a*,9-methanocyclohepta[*a*]naphthalene-4-carboxylate (**10**)

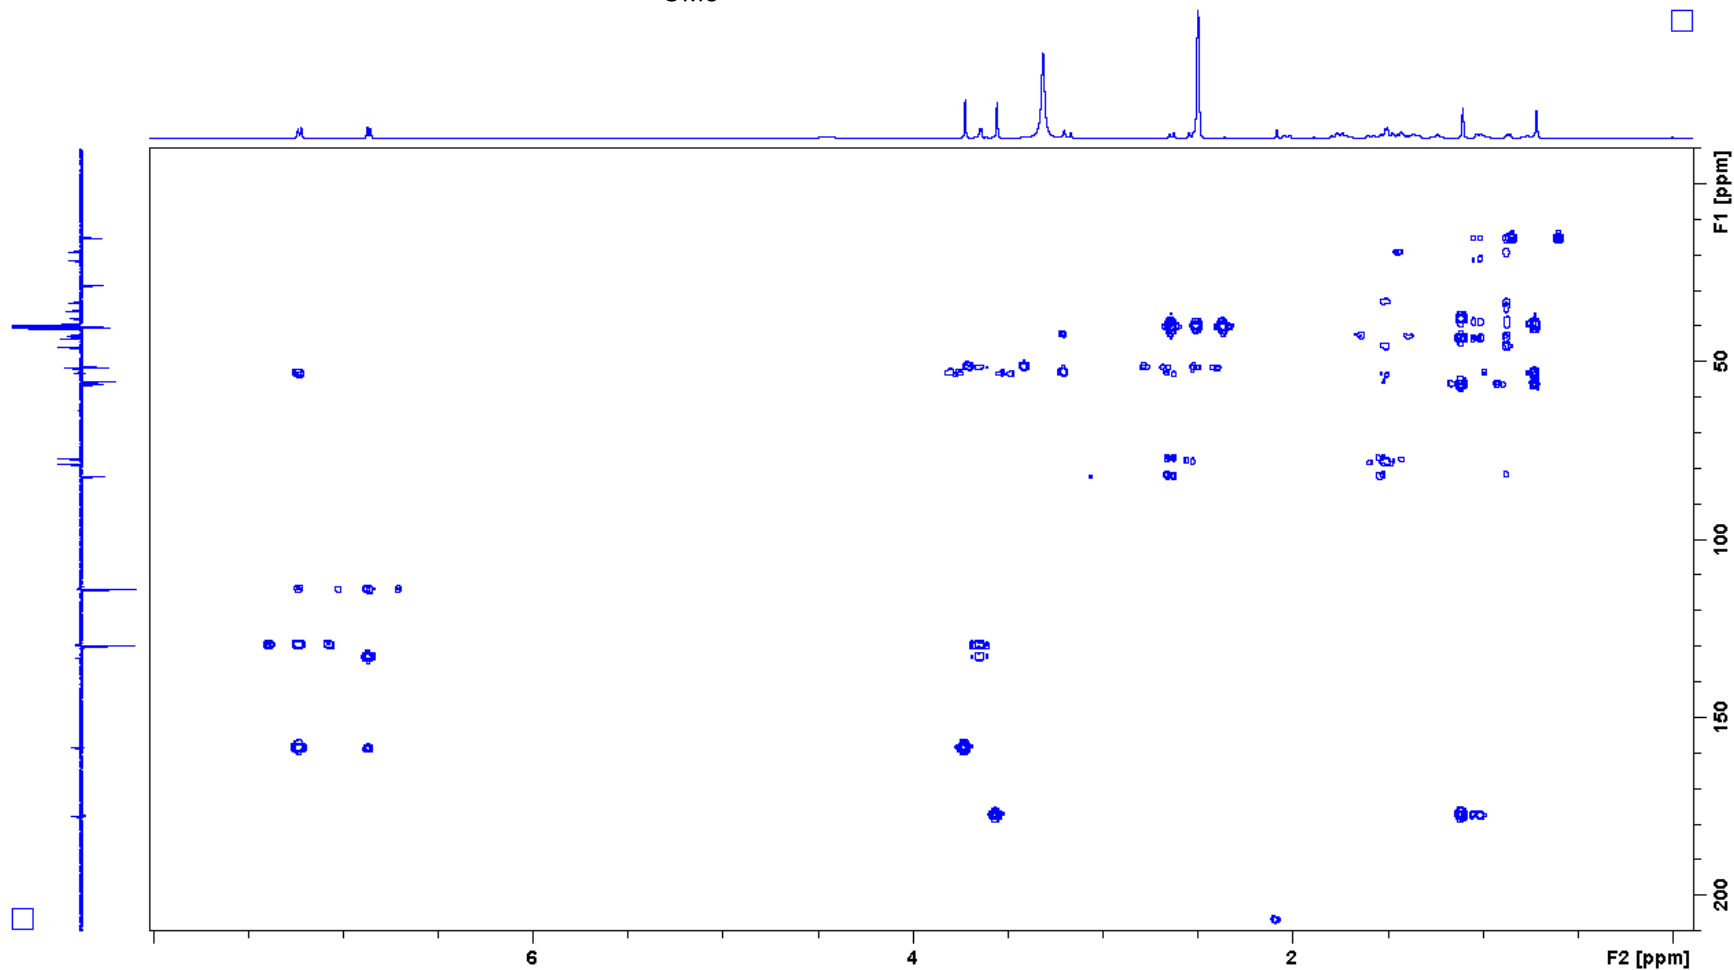

$^1\text{H}$ -NMR of compound (4*R*,4*aS*,6*aR*,7*R*,8*R*,11*aS*,11*bS*)-methyl 8-((((*R*)-1-(4-fluorophenyl)ethyl)amino)methyl)-7,8,9-trihydroxy-4,11*b*-dimethyltetradecahydro-6*a*,9-methanocyclohepta[*a*]naphthalene-4-carboxylate (**11**)

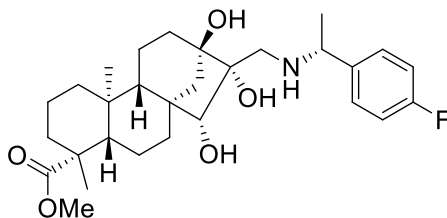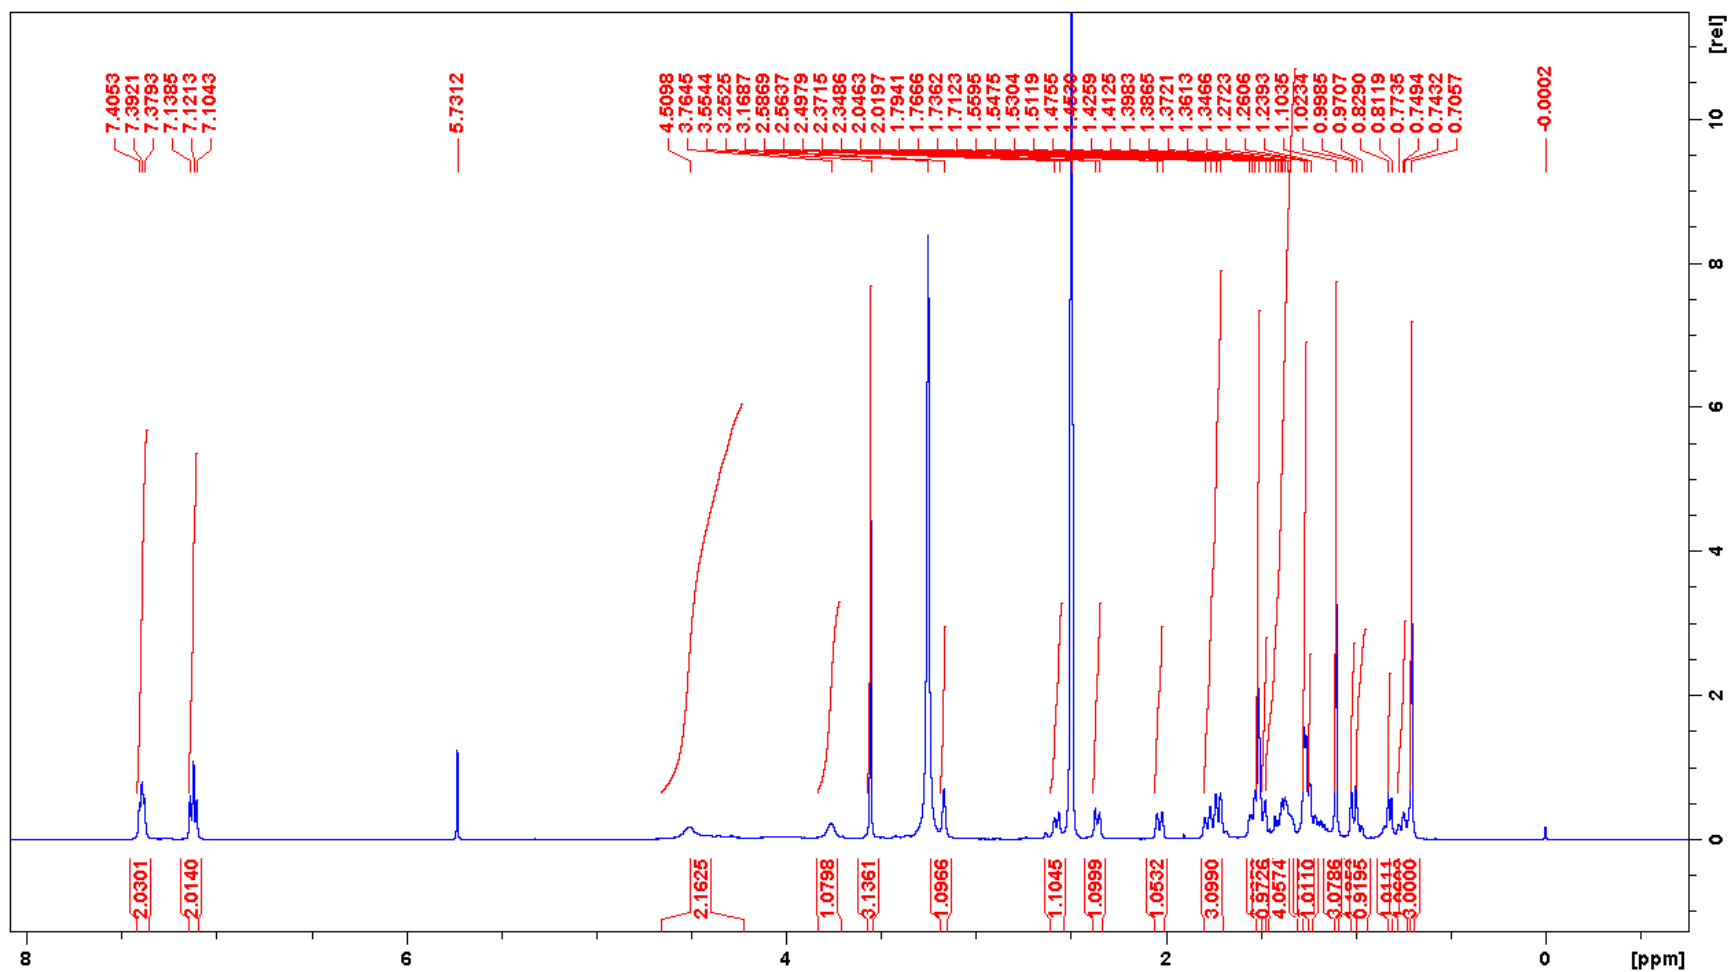

$^{13}\text{C}$ -NMR of compound (4*R*,4*aS*,6*aR*,7*R*,8*R*,11*aS*,11*bS*)-methyl 8-((((*R*)-1-(4-fluorophenyl)ethyl)amino)methyl)-7,8,9-trihydroxy-4,11*b*-dimethyltetradecahydro-6*a*,9-methanocyclohepta[*a*]naphthalene-4-carboxylate (**11**)

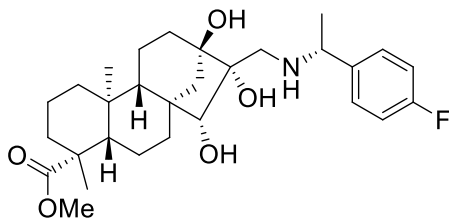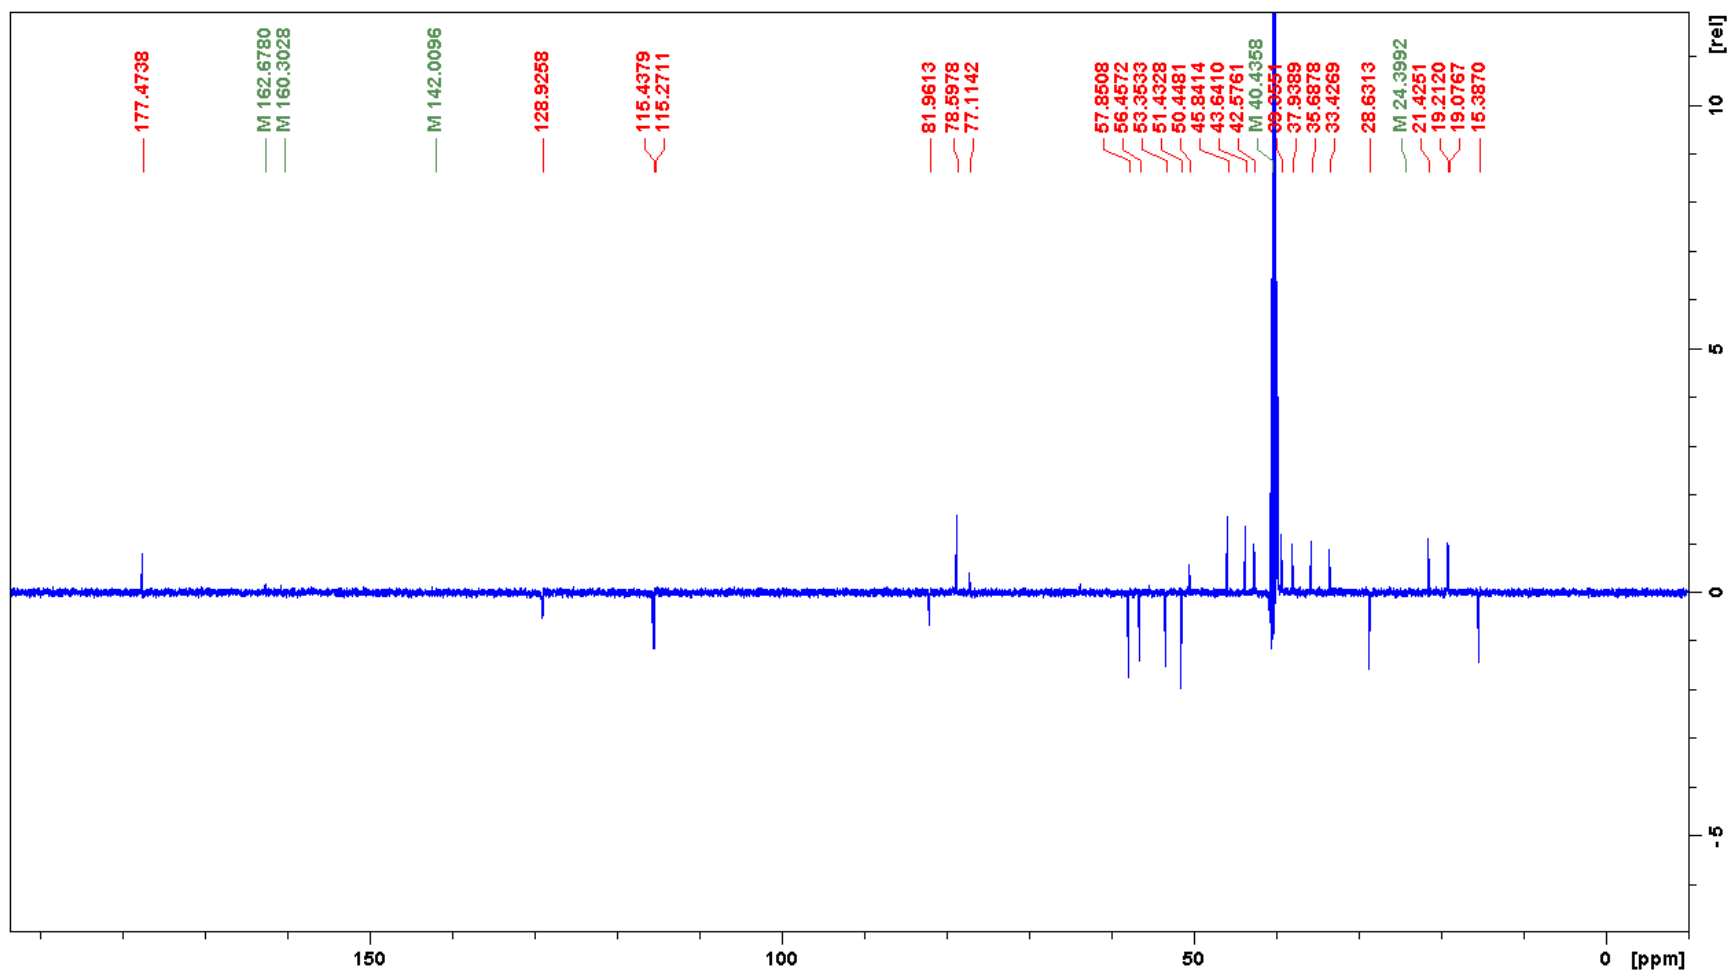

COSY of compound (4*R*,4*aS*,6*aR*,7*R*,8*R*,11*aS*,11*bS*)-methyl 8-((((*R*)-1-(4-fluorophenyl)ethyl)amino)methyl)-7,8,9-trihydroxy-4,11b-dimethyltetradecahydro-6*a*,9-methanocyclohepta[*a*]naphthalene-4-carboxylate (**11**)

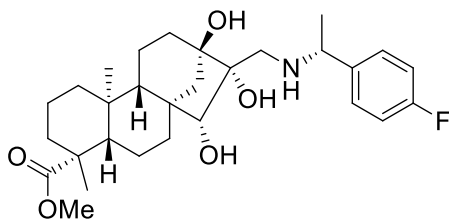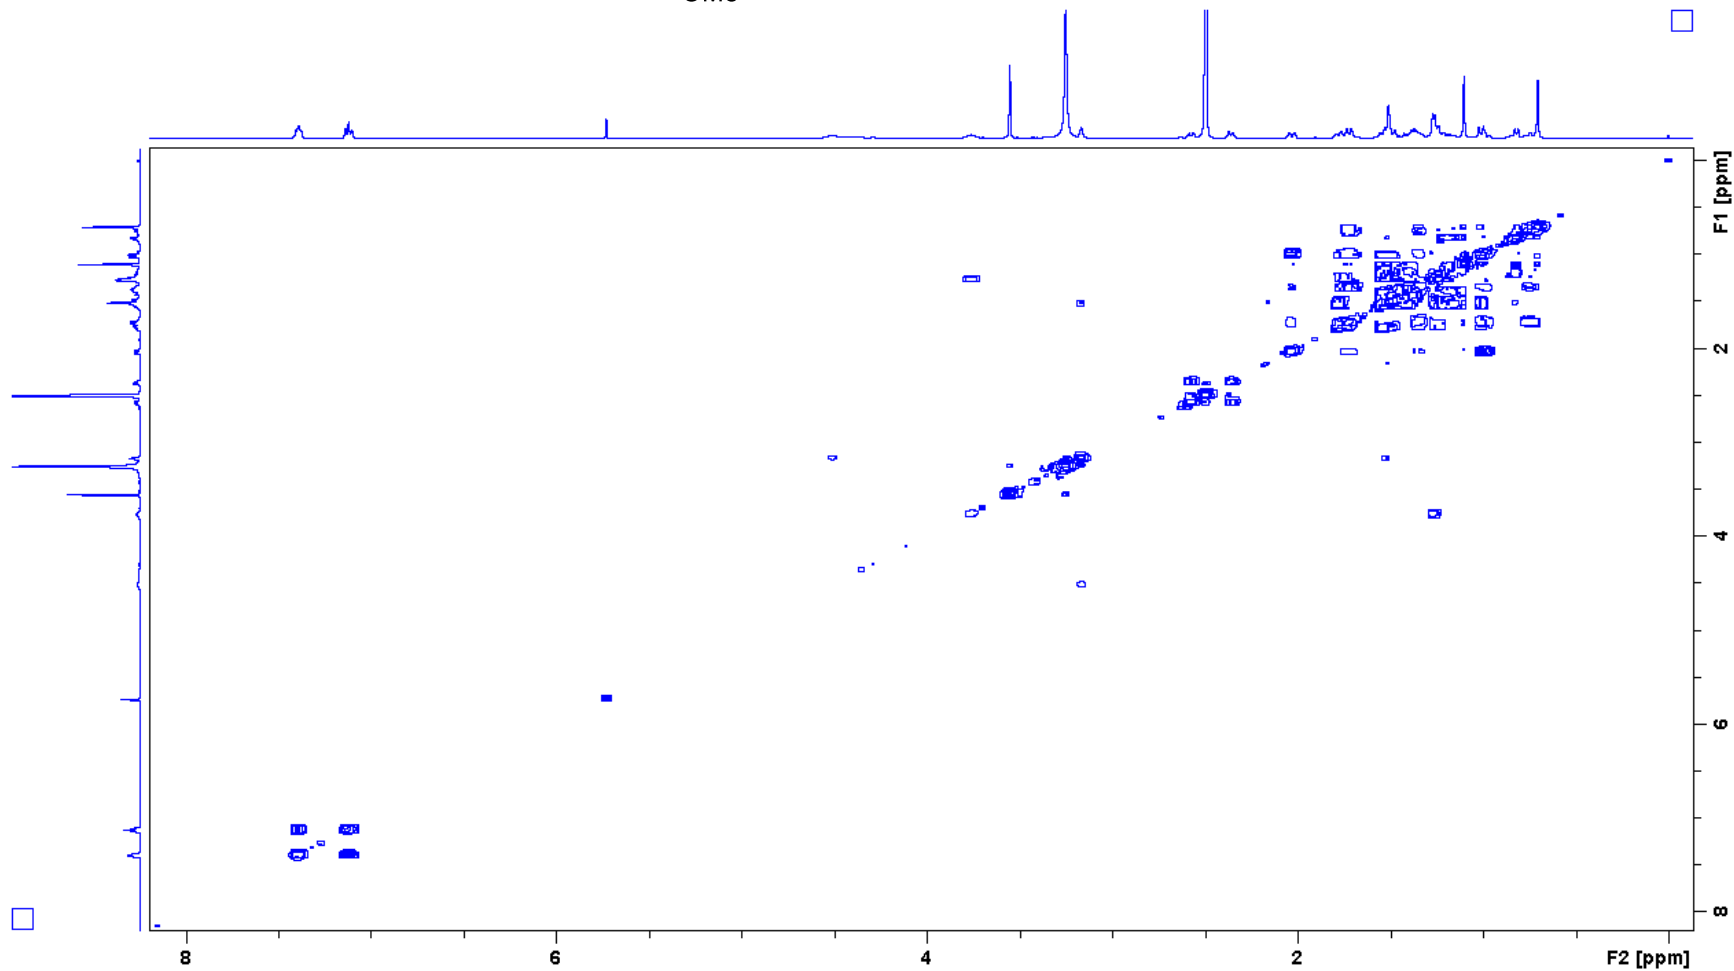

NOESY of compound (4*R*,4*aS*,6*aR*,7*R*,8*R*,11*aS*,11*bS*)-methyl 8-((((*R*)-1-(4-fluorophenyl)ethyl)amino)methyl)-7,8,9-trihydroxy-4,11*b*-dimethyltetradecahydro-6*a*,9-methanocyclohepta[*a*]naphthalene-4-carboxylate (**11**)

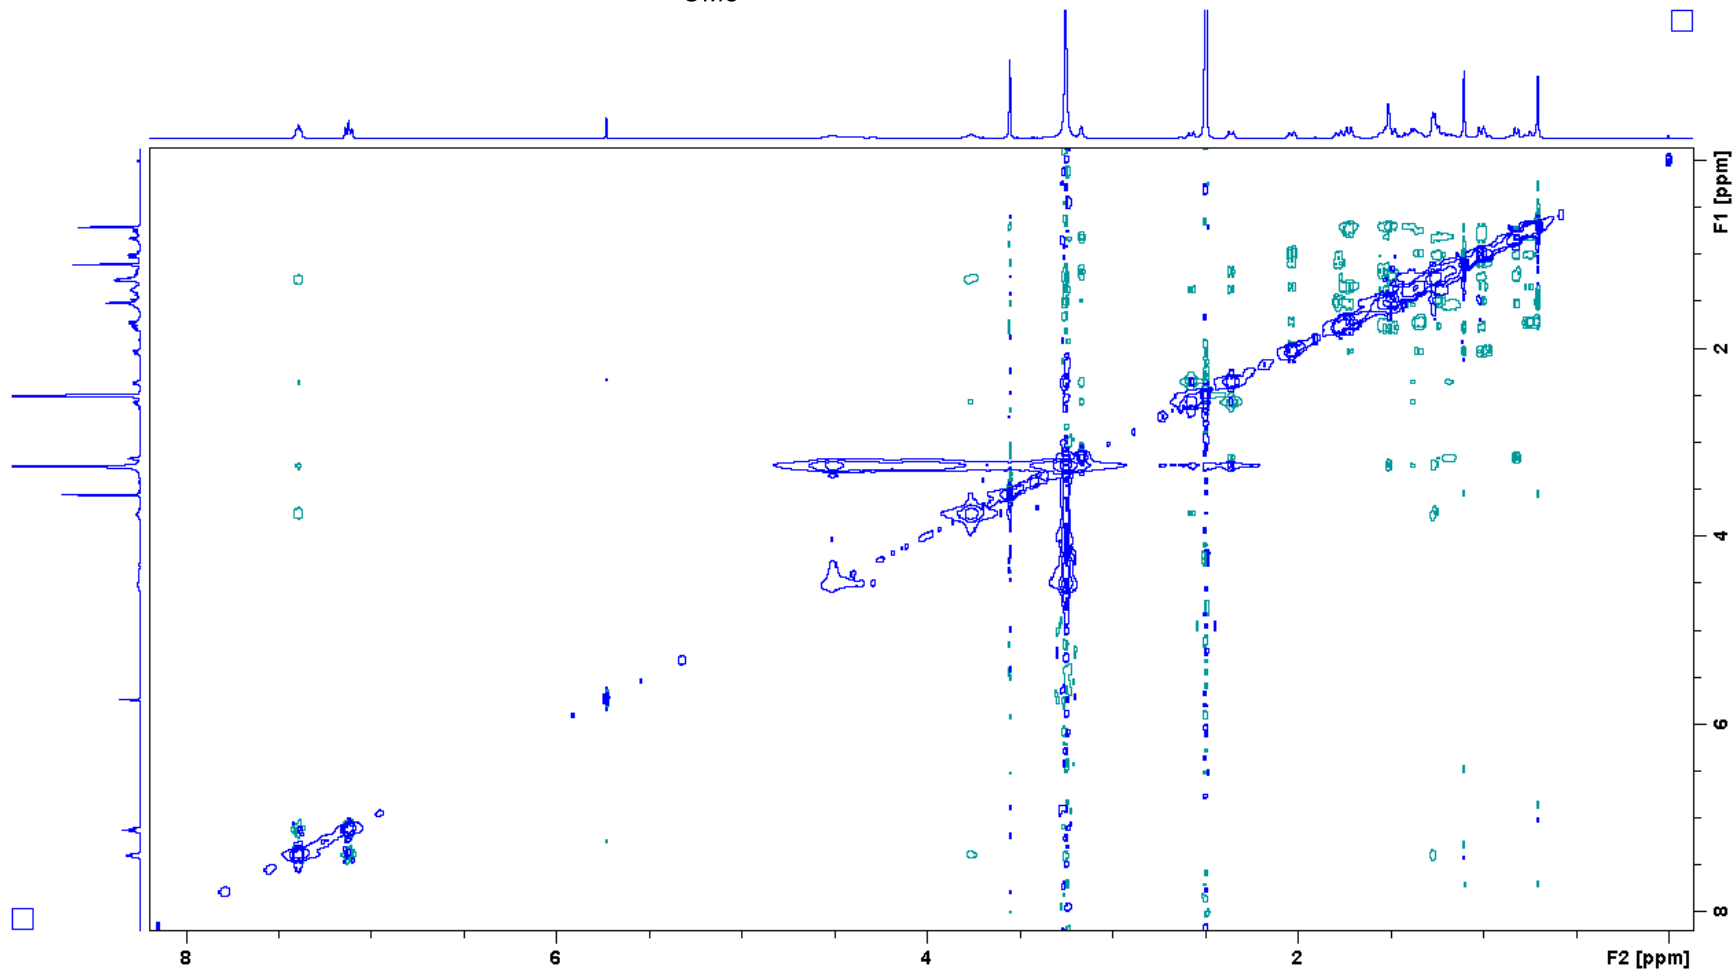



HSQC of compound (4*R*,4*aS*,6*aR*,7*R*,8*R*,11*aS*,11*bS*)-methyl 8-(((*R*)-1-(4-fluorophenyl)ethyl)amino)methyl)-7,8,9-trihydroxy-4,11*b*-dimethyltetradecahydro-6*a*,9-methanocyclohepta[*a*]naphthalene-4-carboxylate (**11**)

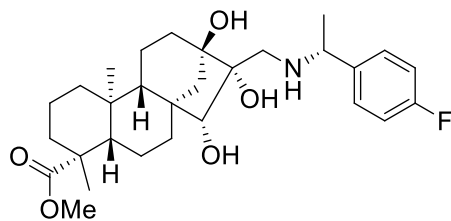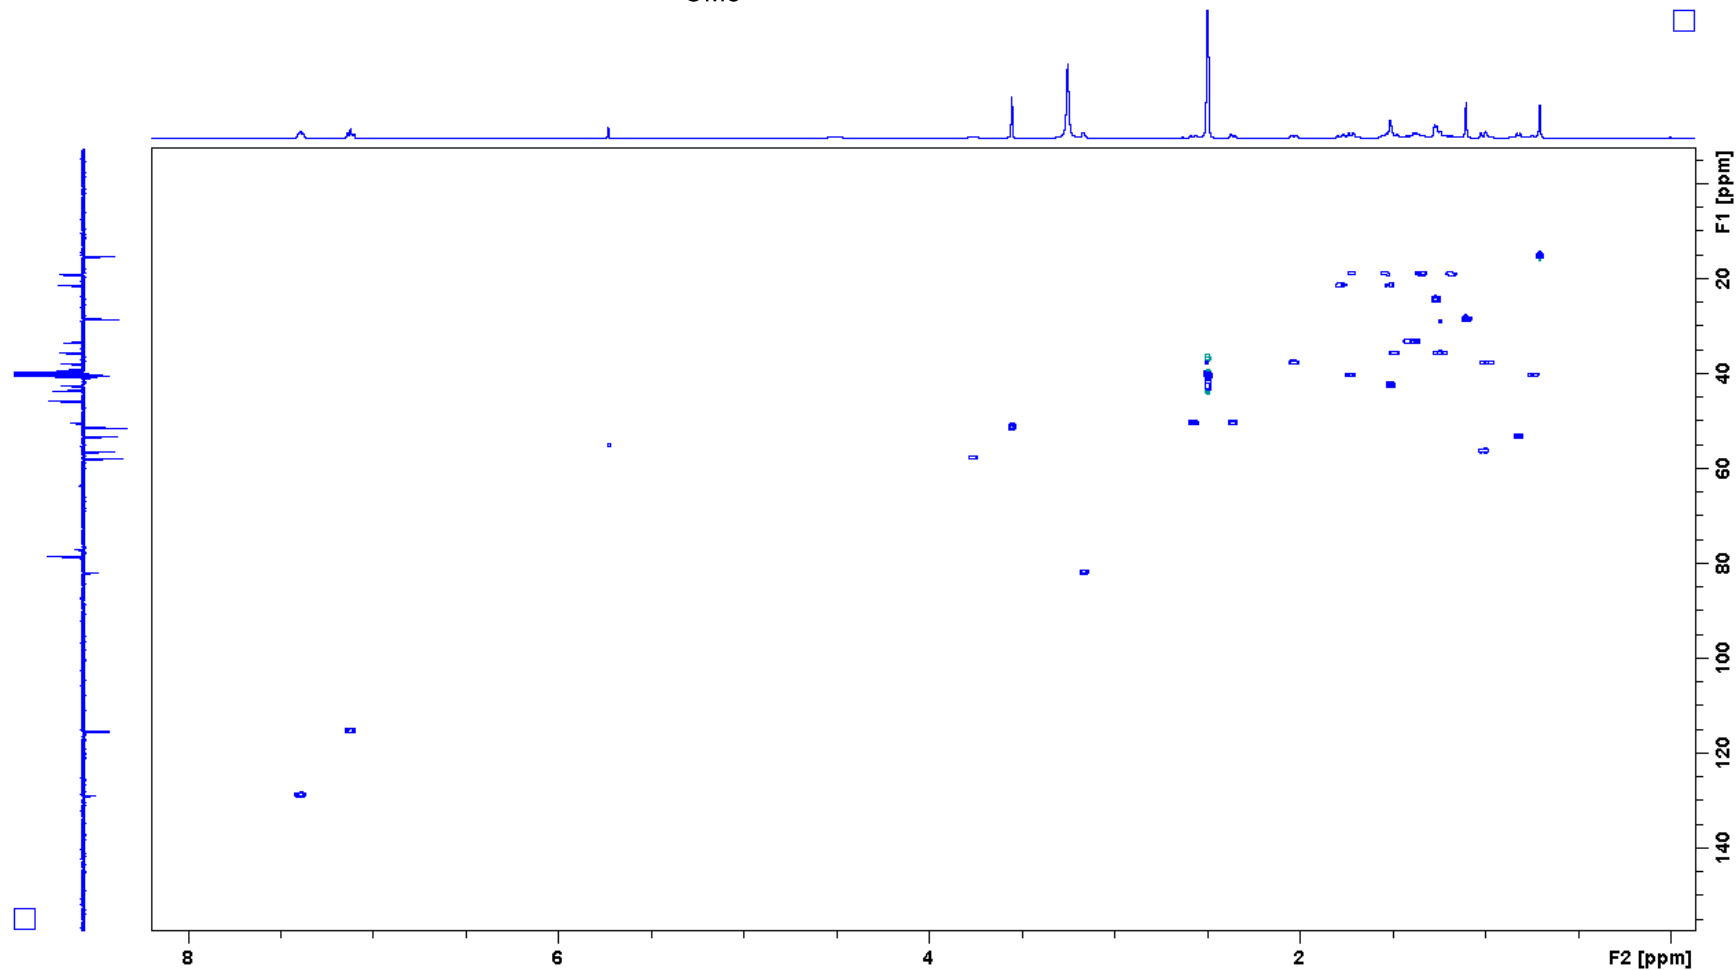

HMBC of compound (4*R*,4*aS*,6*aR*,7*R*,8*R*,11*aS*,11*bS*)-methyl 8-((((*R*)-1-(4-fluorophenyl)ethyl)amino)methyl)-7,8,9-trihydroxy-4,11*b*-dimethyltetradecahydro-6*a*,9-methanocyclohepta[*a*]naphthalene-4-carboxylate (**11**)

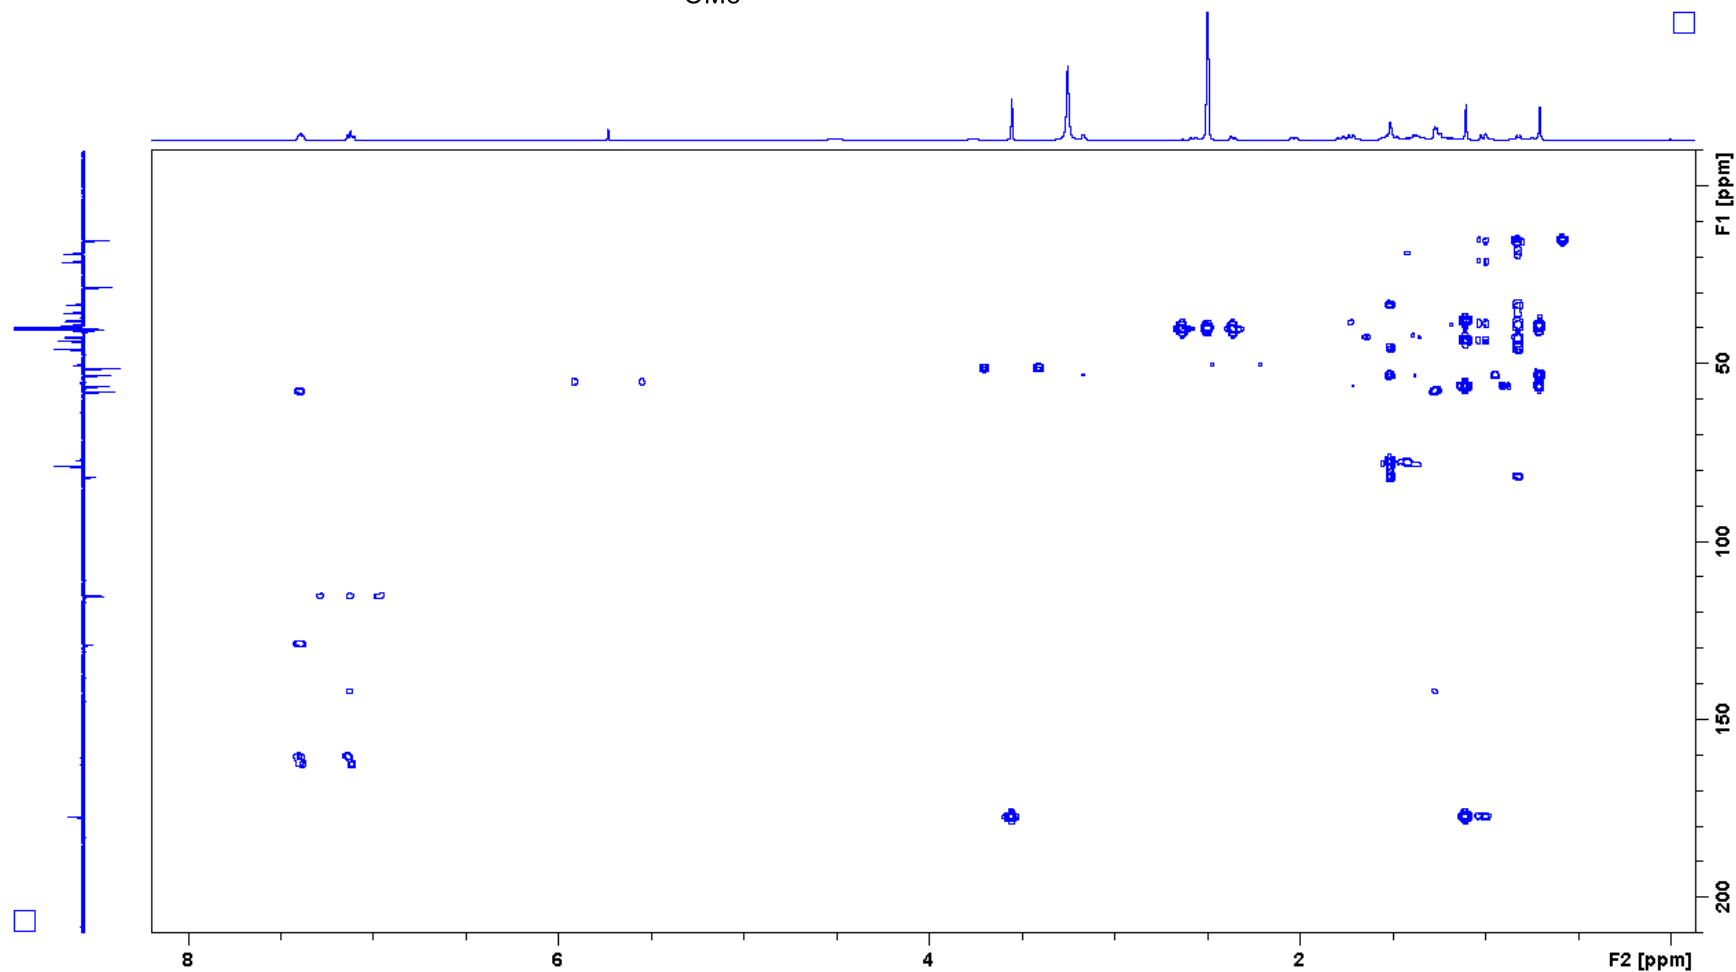

$^{19}\text{F}$ -NMR of compound (4*R*,4*aS*,6*aR*,7*R*,8*R*,11*aS*,11*bS*)-methyl 8-((((*R*)-1-(4-fluorophenyl)ethyl)amino)methyl)-7,8,9-trihydroxy-4,11*b*-dimethyltetradecahydro-6*a*,9-methanocyclohepta[*a*]naphthalene-4-carboxylate (**11**)

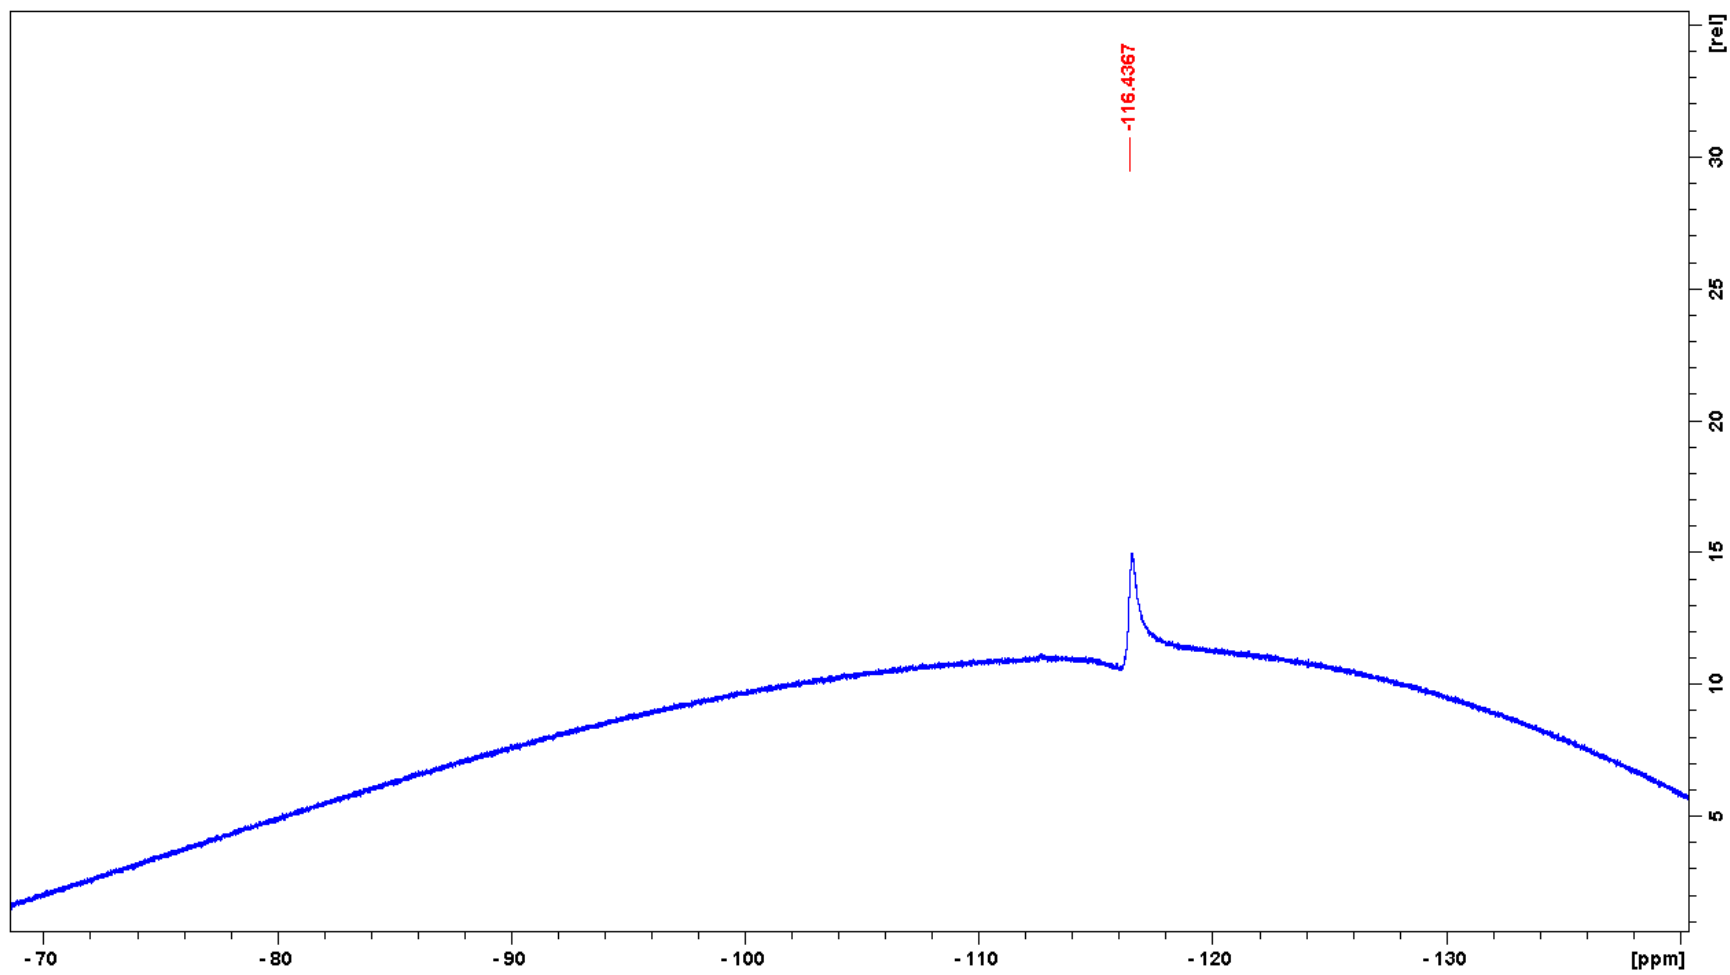

$^1\text{H}$ -NMR of compound (4*R*,6*aR*,7*R*,8*R*,9*S*,11*bS*)-methyl 7,8,9-trihydroxy-4,11*b*-dimethyl-8-(((*R*)-1-(naphthalen-2-yl)ethyl)amino)methyl)tetradecahydro-6*a*,9-methanocyclohepta[*a*]naphthalene-4-carboxylate (**12**)

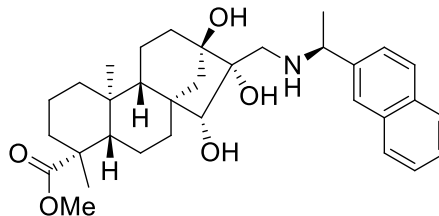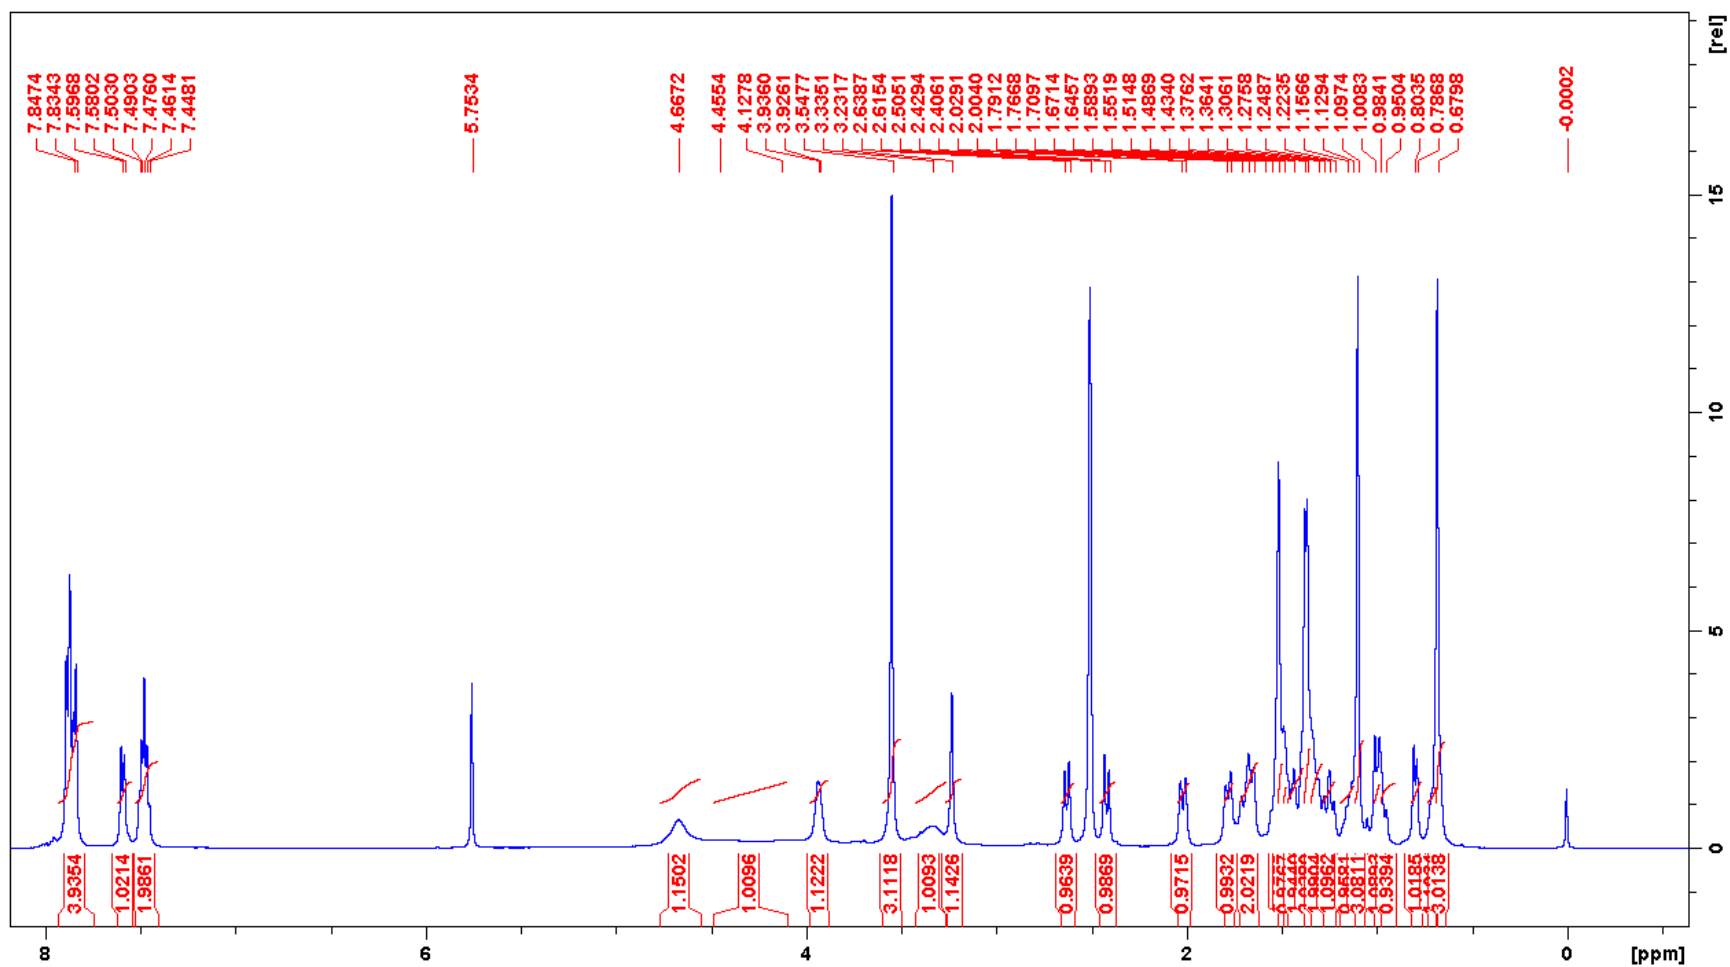

$^{13}\text{C}$ -NMR of compound (4*R*,6*aR*,7*R*,8*R*,9*S*,11*bS*)-methyl 7,8,9-trihydroxy-4,11*b*-dimethyl-8-(((*R*)-1-(naphthalen-2-yl)ethyl)amino)methyl)tetradecahydro-6*a*,9-methanocyclohepta[*a*]naphthalene-4-carboxylate (**12**)

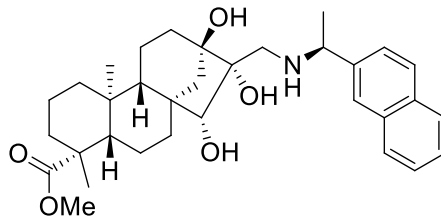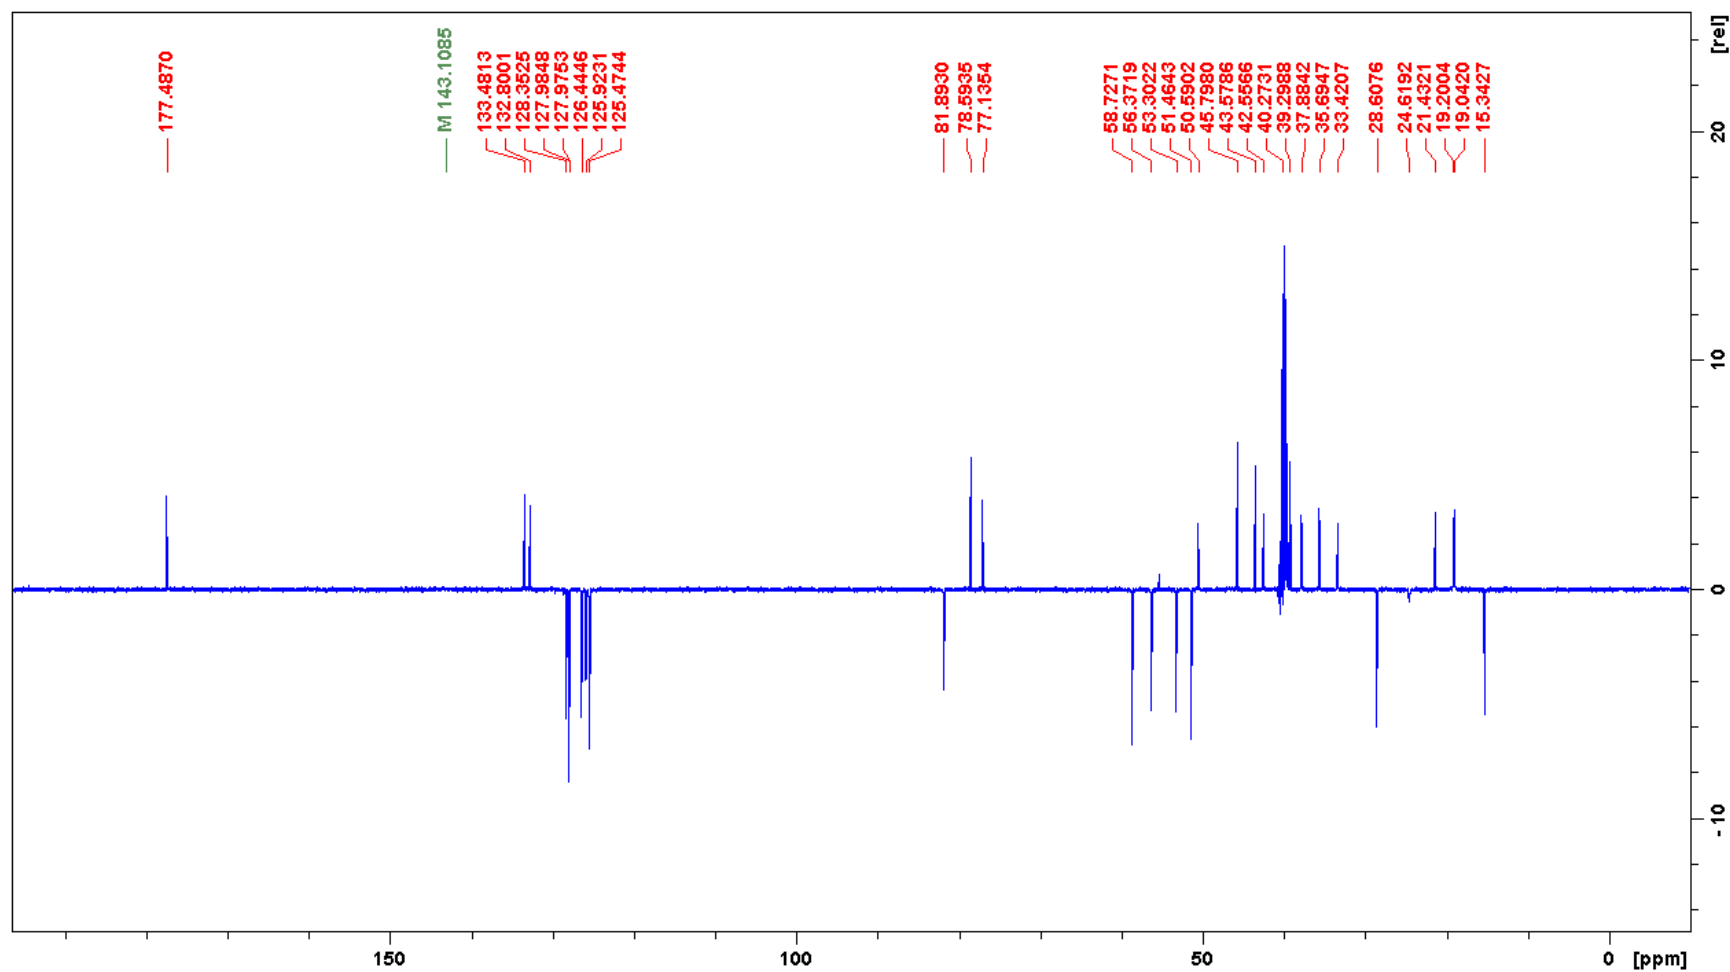

COSY of compound (4*R*,6*aR*,7*R*,8*R*,9*S*,11*bS*)-methyl 7,8,9-trihydroxy-4,11*b*-dimethyl-8-(((*R*)-1-(naphthalen-2-yl)ethyl)amino)methyl)tetradecahydro-6*a*,9-methanocyclohepta[*a*]naphthalene-4-carboxylate (**12**)

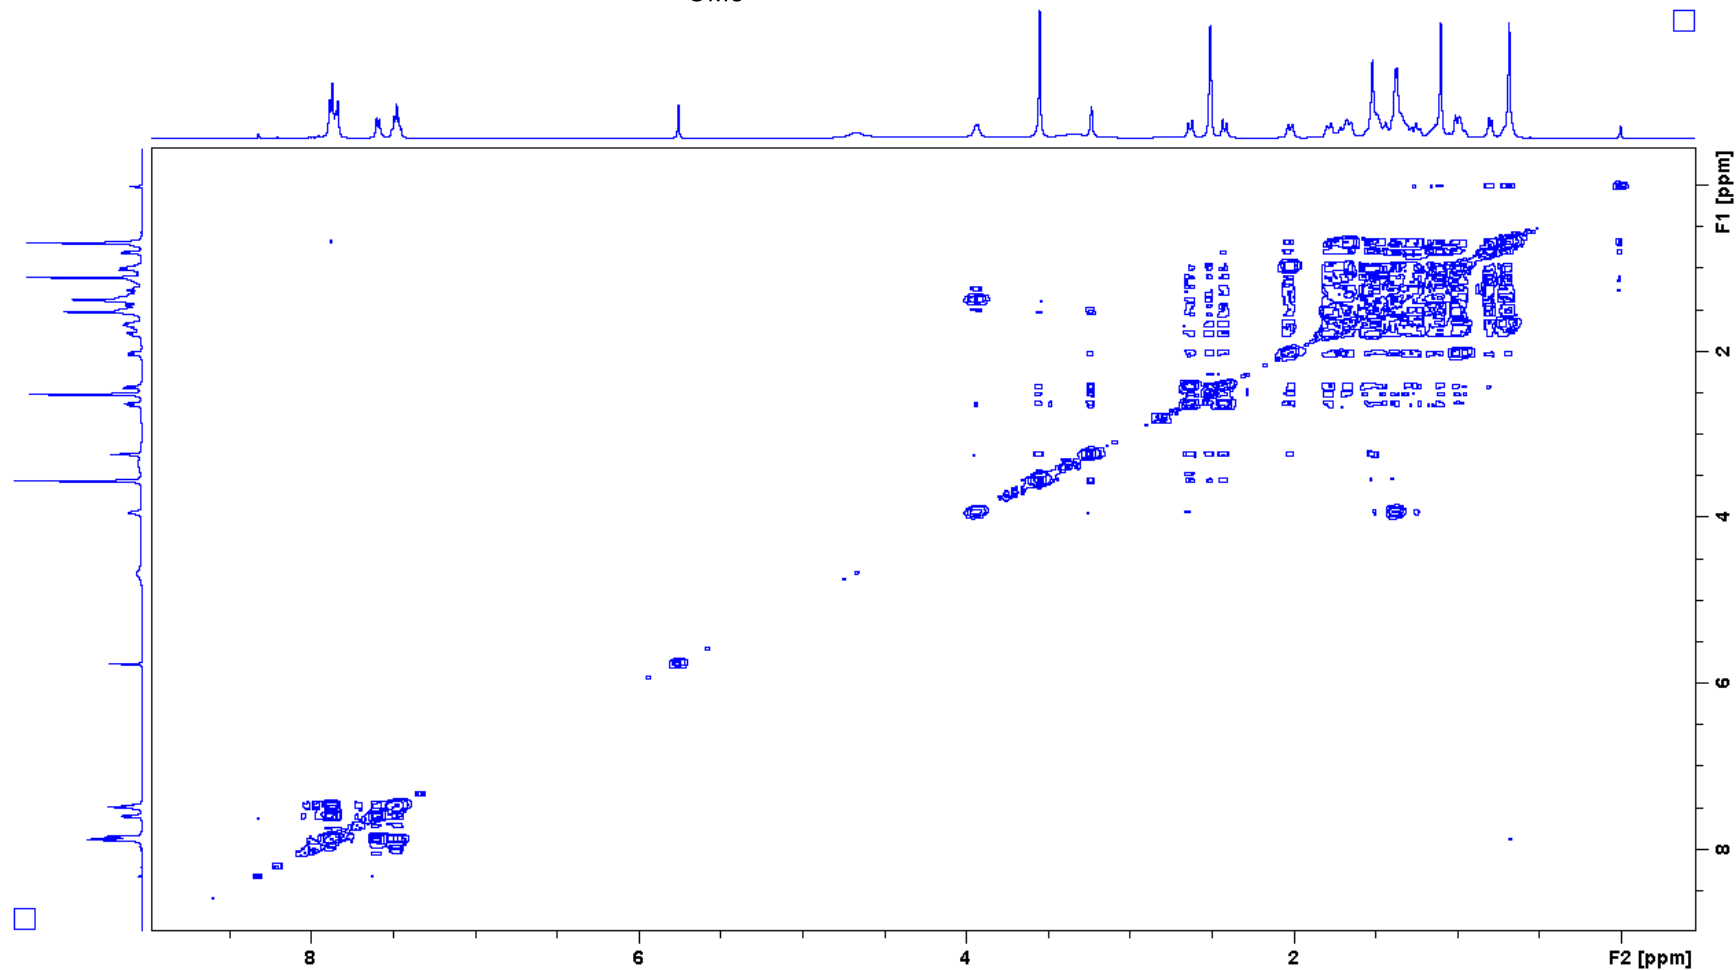

NOESY of compound (4*R*,6*aR*,7*R*,8*R*,9*S*,11*bS*)-methyl 7,8,9-trihydroxy-4,11*b*-dimethyl-8-(((*R*)-1-(naphthalen-2-yl)ethyl)amino)methyl)tetradecahydro-6*a*,9-methanocyclohepta[*a*]naphthalene-4-carboxylate (**12**)

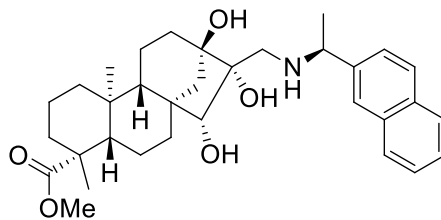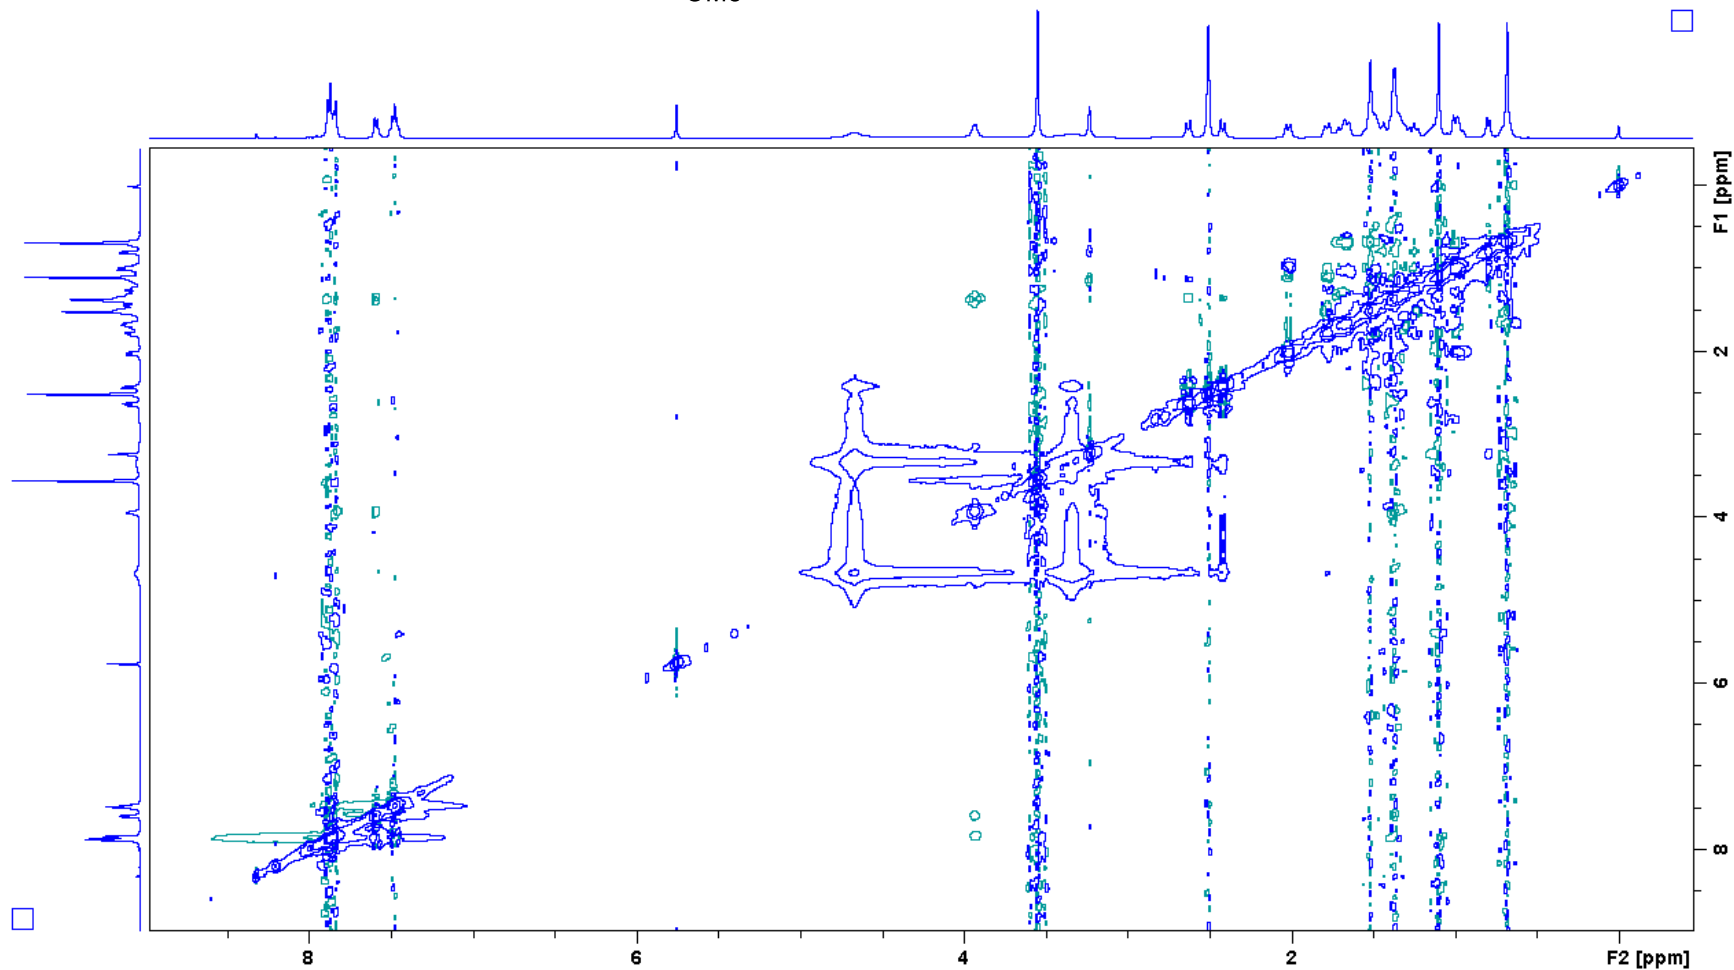

HSQC of compound (4*R*,6*aR*,7*R*,8*R*,9*S*,11*bS*)-methyl 7,8,9-trihydroxy-4,11*b*-dimethyl-8-(((*R*)-1-(naphthalen-2-yl)ethyl)amino)methyl)tetradecahydro-6*a*,9-methanocyclohepta[*a*]naphthalene-4-carboxylate (**12**)

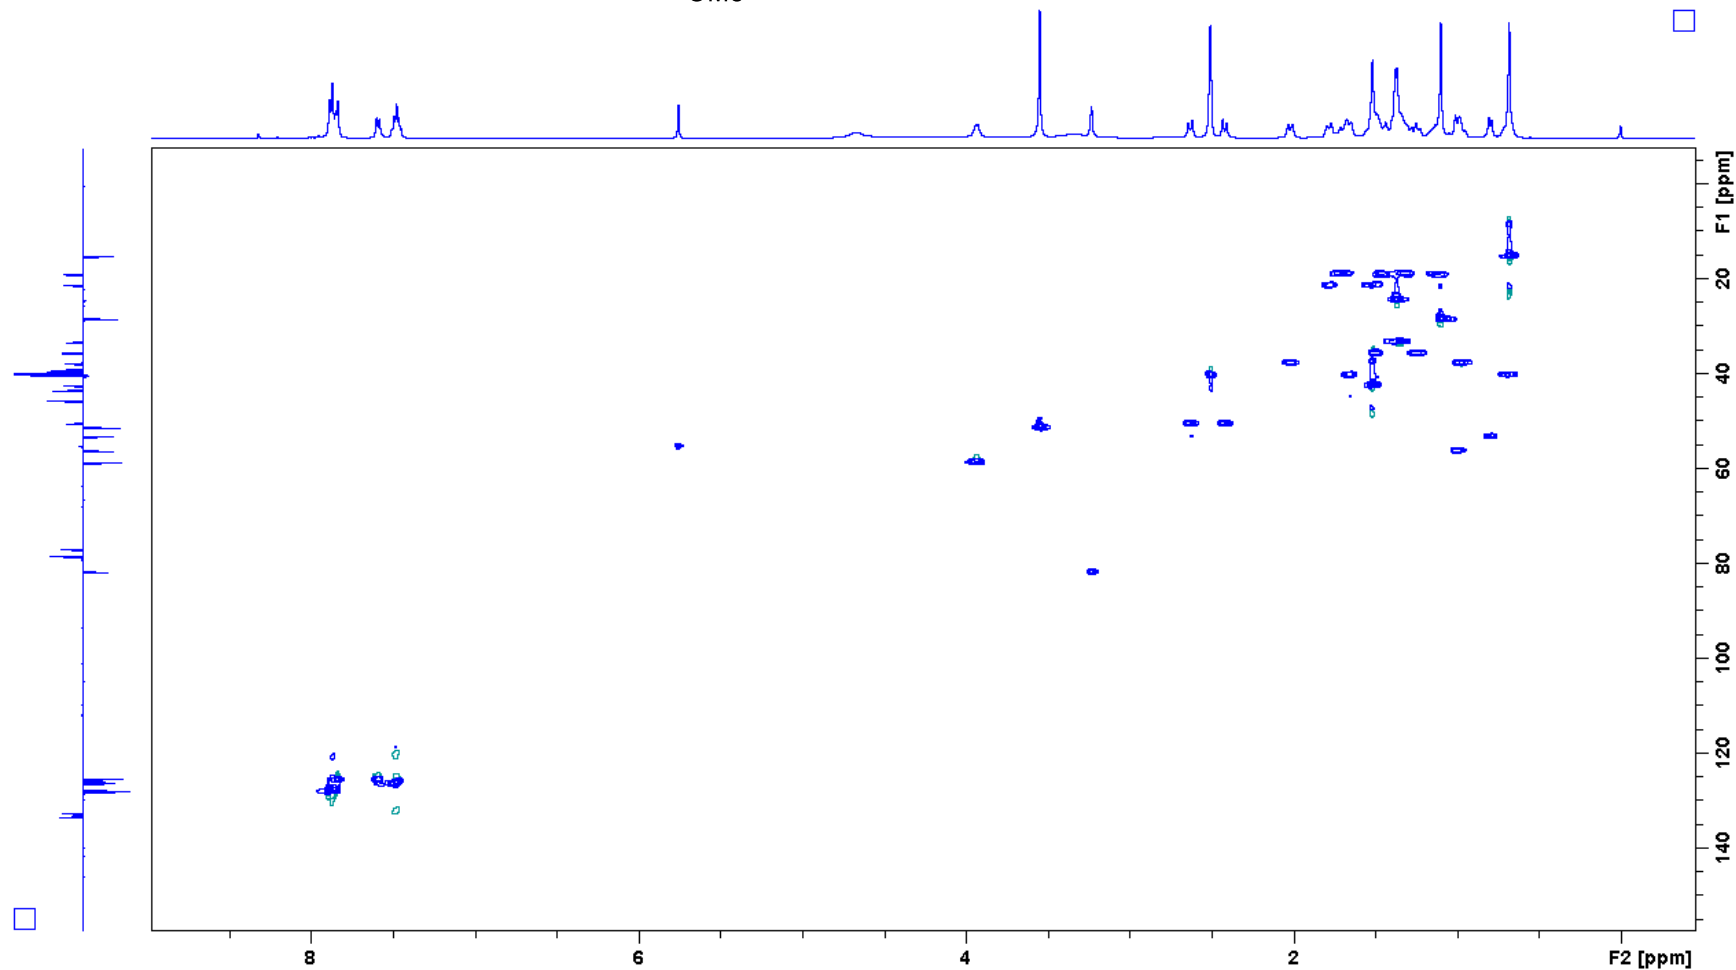



HMBC of compound (4*R*,6*aR*,7*R*,8*R*,9*S*,11*bS*)-methyl 7,8,9-trihydroxy-4,11*b*-dimethyl-8-(((*R*)-1-(naphthalen-2-yl)ethyl)amino)methyl)tetradecahydro-6*a*,9-methanocyclohepta[*a*]naphthalene-4-carboxylate (**12**)

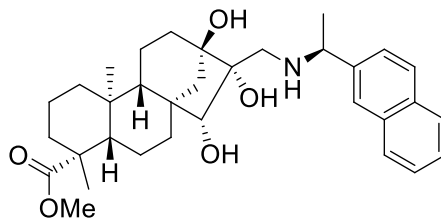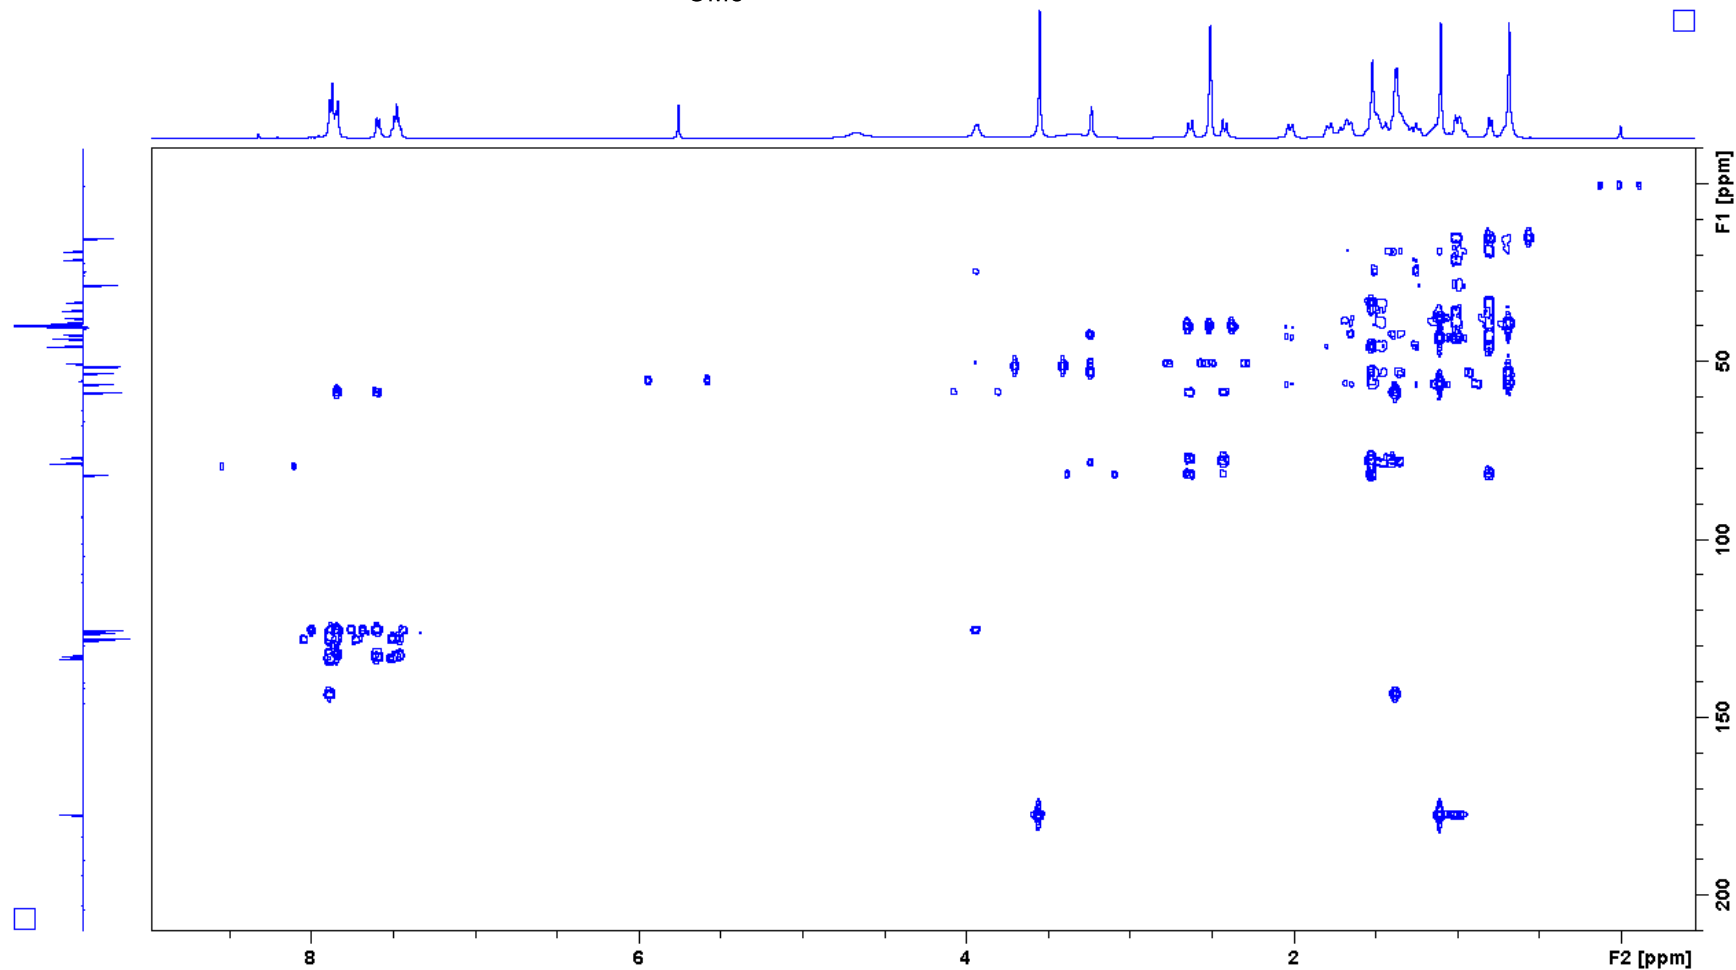

$^1\text{H}$ -NMR of compound (4*R*,6*aR*,7*R*,8*R*,9*S*,11*bS*)-methyl 7,8,9-trihydroxy-4,11*b*-dimethyl-8-(((*S*)-1-(naphthalen-2-yl)ethyl)amino)methyl)tetradecahydro-6*a*,9-methanocyclohepta[*a*]naphthalene-4-carboxylate (**13**)

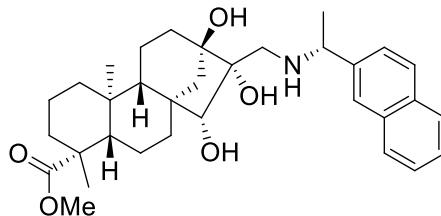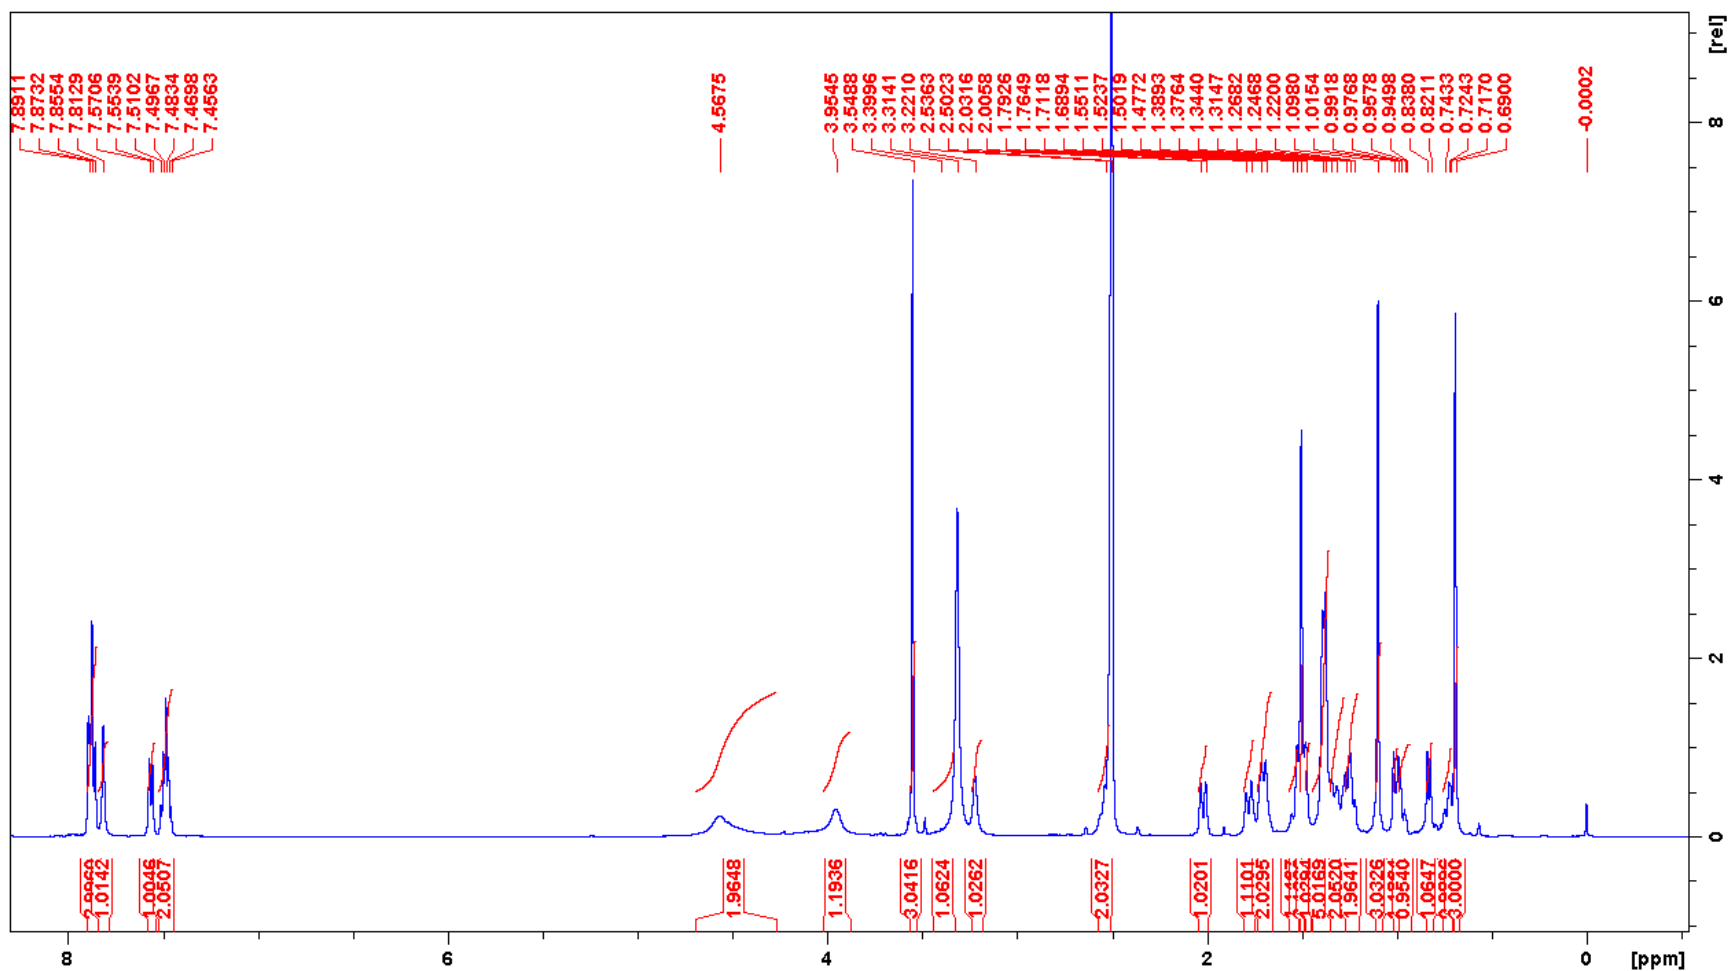

$^{13}\text{C}$ -NMR of compound (4*R*,6*aR*,7*R*,8*R*,9*S*,11*bS*)-methyl 7,8,9-trihydroxy-4,11*b*-dimethyl-8-((((*S*)-1-(naphthalen-2-yl)ethyl)amino)methyl)tetradecahydro-6*a*,9-methanocyclohepta[*a*]naphthalene-4-carboxylate (**13**)

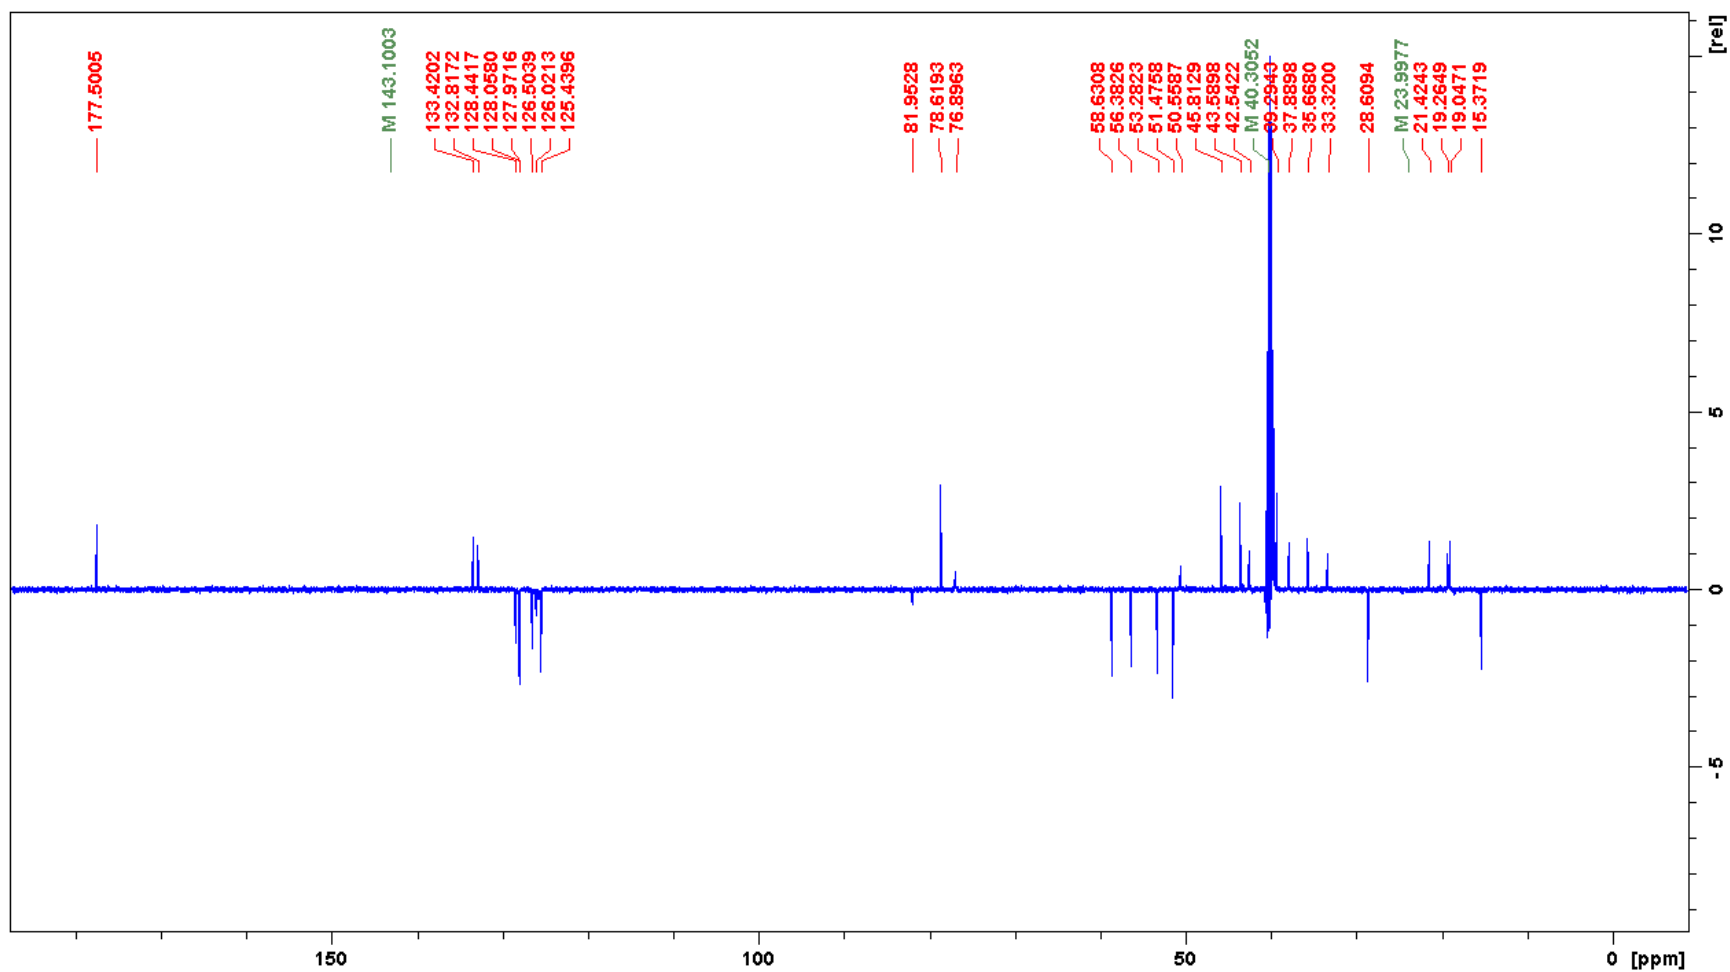

COSY of compound (4*R*,6*aR*,7*R*,8*R*,9*S*,11*bS*)-methyl 7,8,9-trihydroxy-4,11*b*-dimethyl-8-((((*S*)-1-(naphthalen-2-yl)ethyl)amino)methyl)tetradecahydro-6*a*,9-methanocyclohepta[*a*]naphthalene-4-carboxylate (**13**)

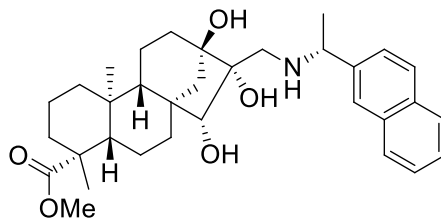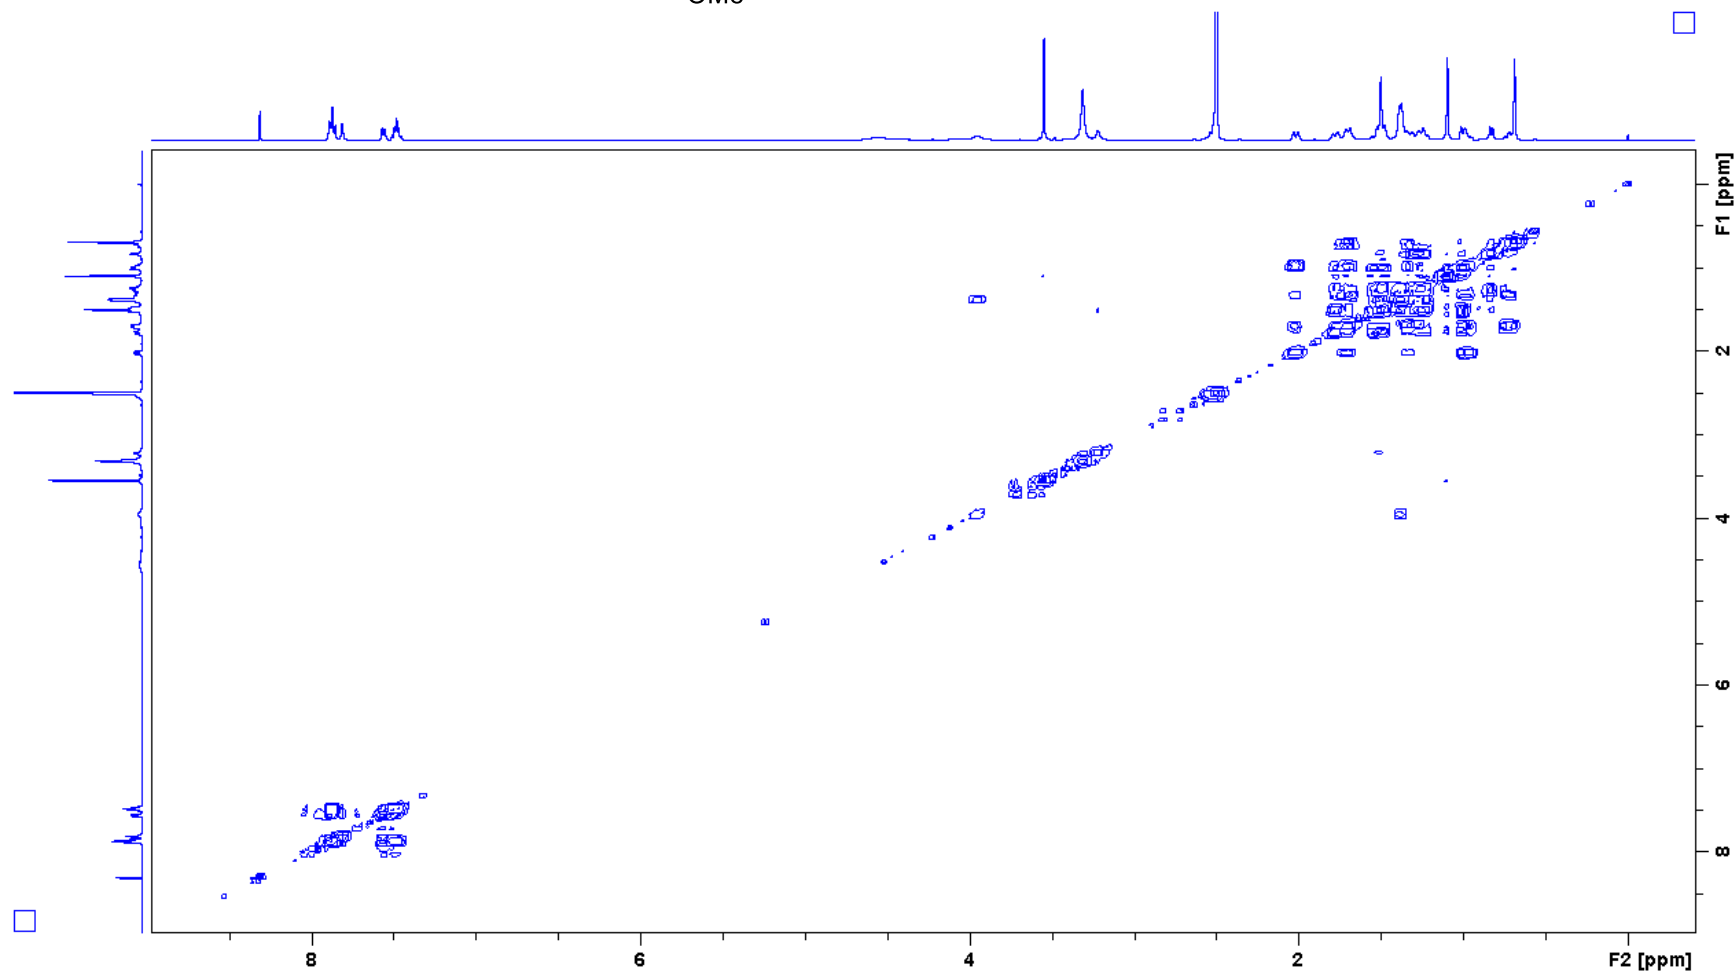

NOESY of compound (4*R*,6*aR*,7*R*,8*R*,9*S*,11*bS*)-methyl 7,8,9-trihydroxy-4,11*b*-dimethyl-8-(((*S*)-1-(naphthalen-2-yl)ethyl)amino)methyl)tetradecahydro-6*a*,9-methanocyclohepta[*a*]naphthalene-4-carboxylate (**13**)

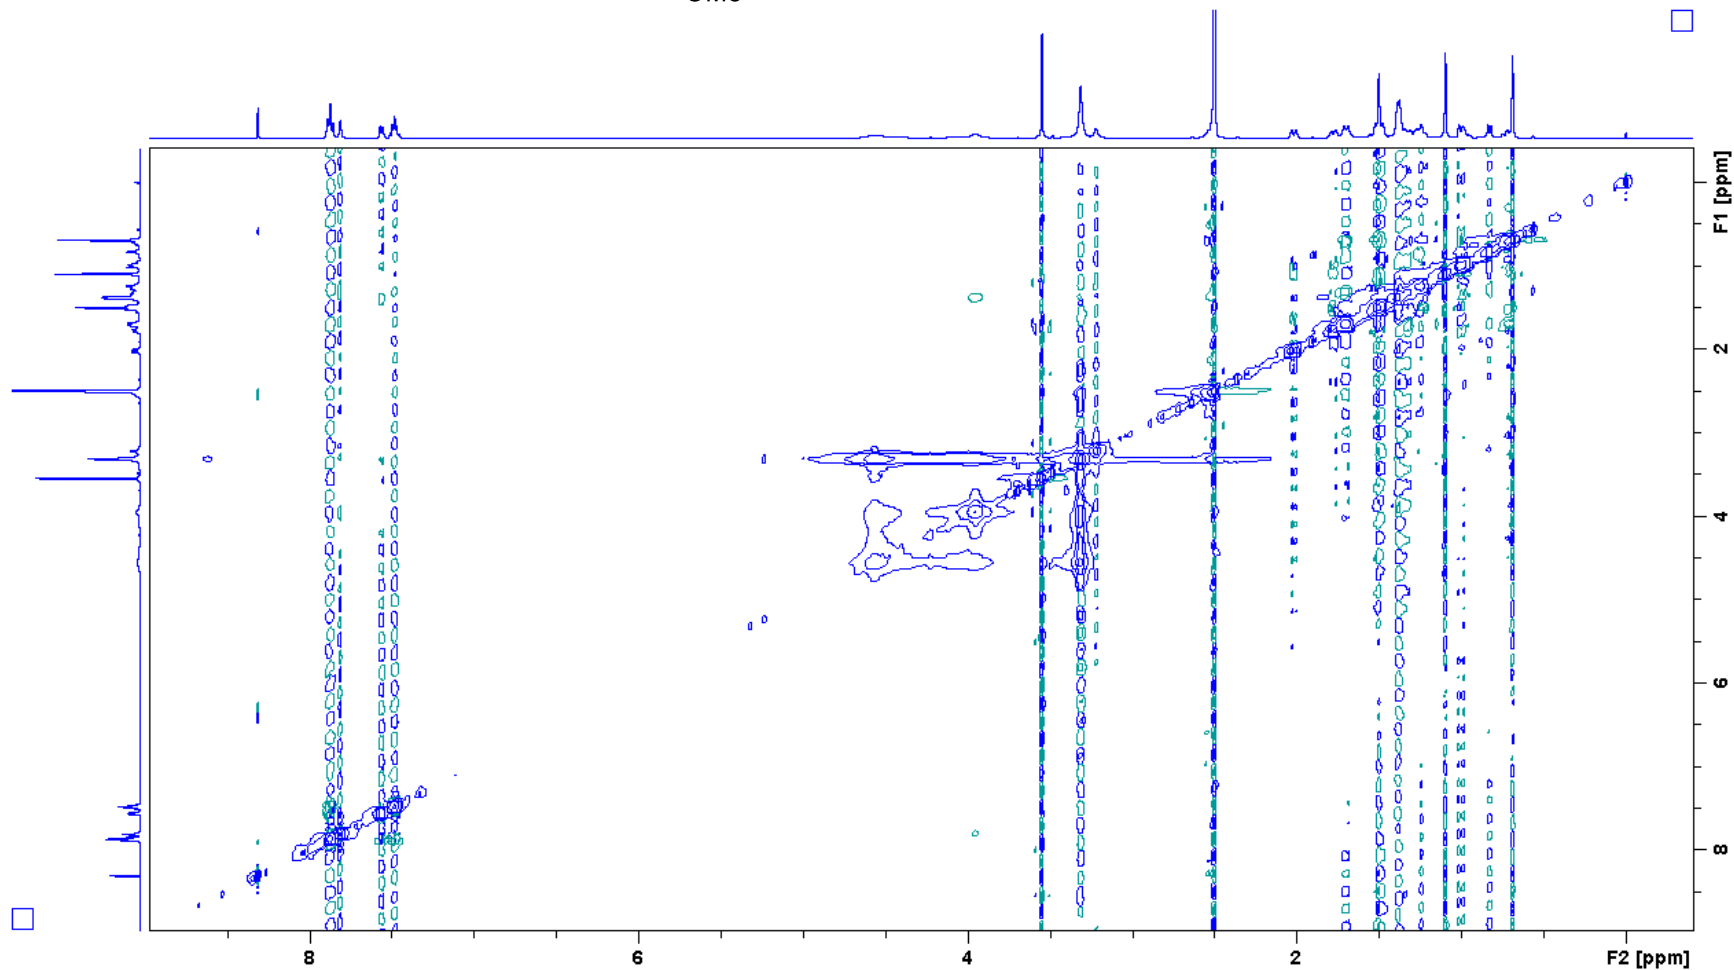

HSQC of compound (4*R*,6*aR*,7*R*,8*R*,9*S*,11*bS*)-methyl 7,8,9-trihydroxy-4,11*b*-dimethyl-8-(((*S*)-1-(naphthalen-2-yl)ethyl)amino)methyl)tetradecahydro-6*a*,9-methanocyclohepta[*a*]naphthalene-4-carboxylate (**13**)

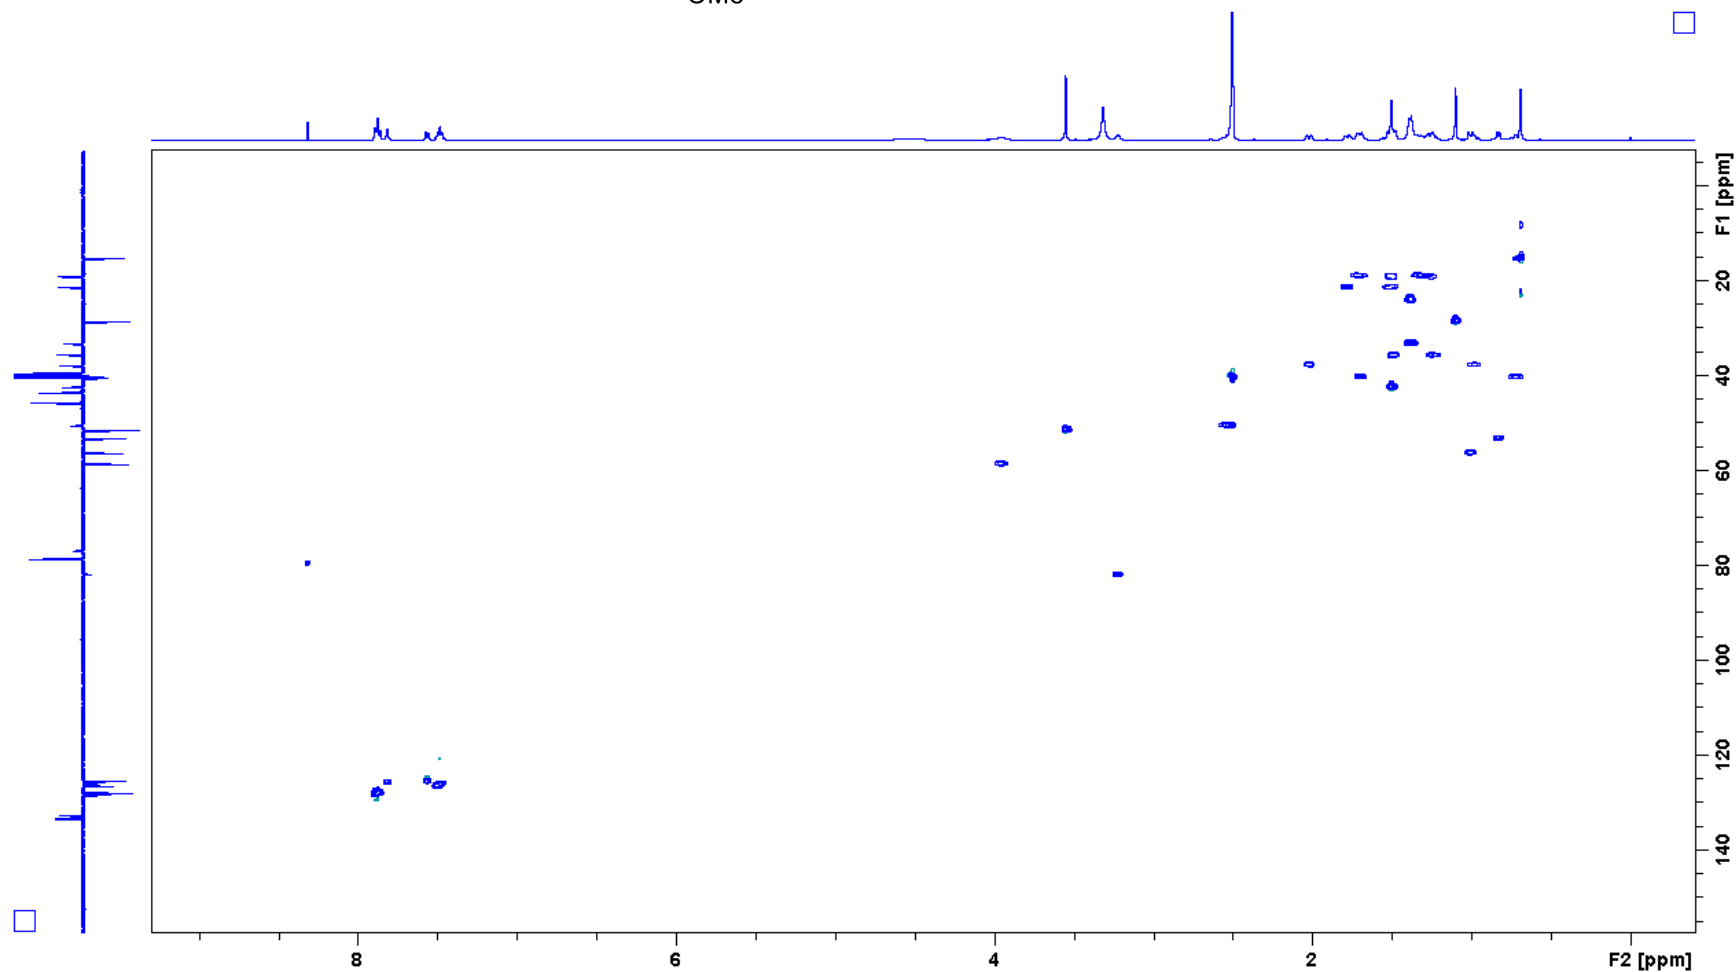

HMBC of compound (4*R*,6*aR*,7*R*,8*R*,9*S*,11*bS*)-methyl 7,8,9-trihydroxy-4,11*b*-dimethyl-8-((((*S*)-1-(naphthalen-2-yl)ethyl)amino)methyl)tetradecahydro-6*a*,9-methanocyclohepta[*a*]naphthalene-4-carboxylate (**13**)

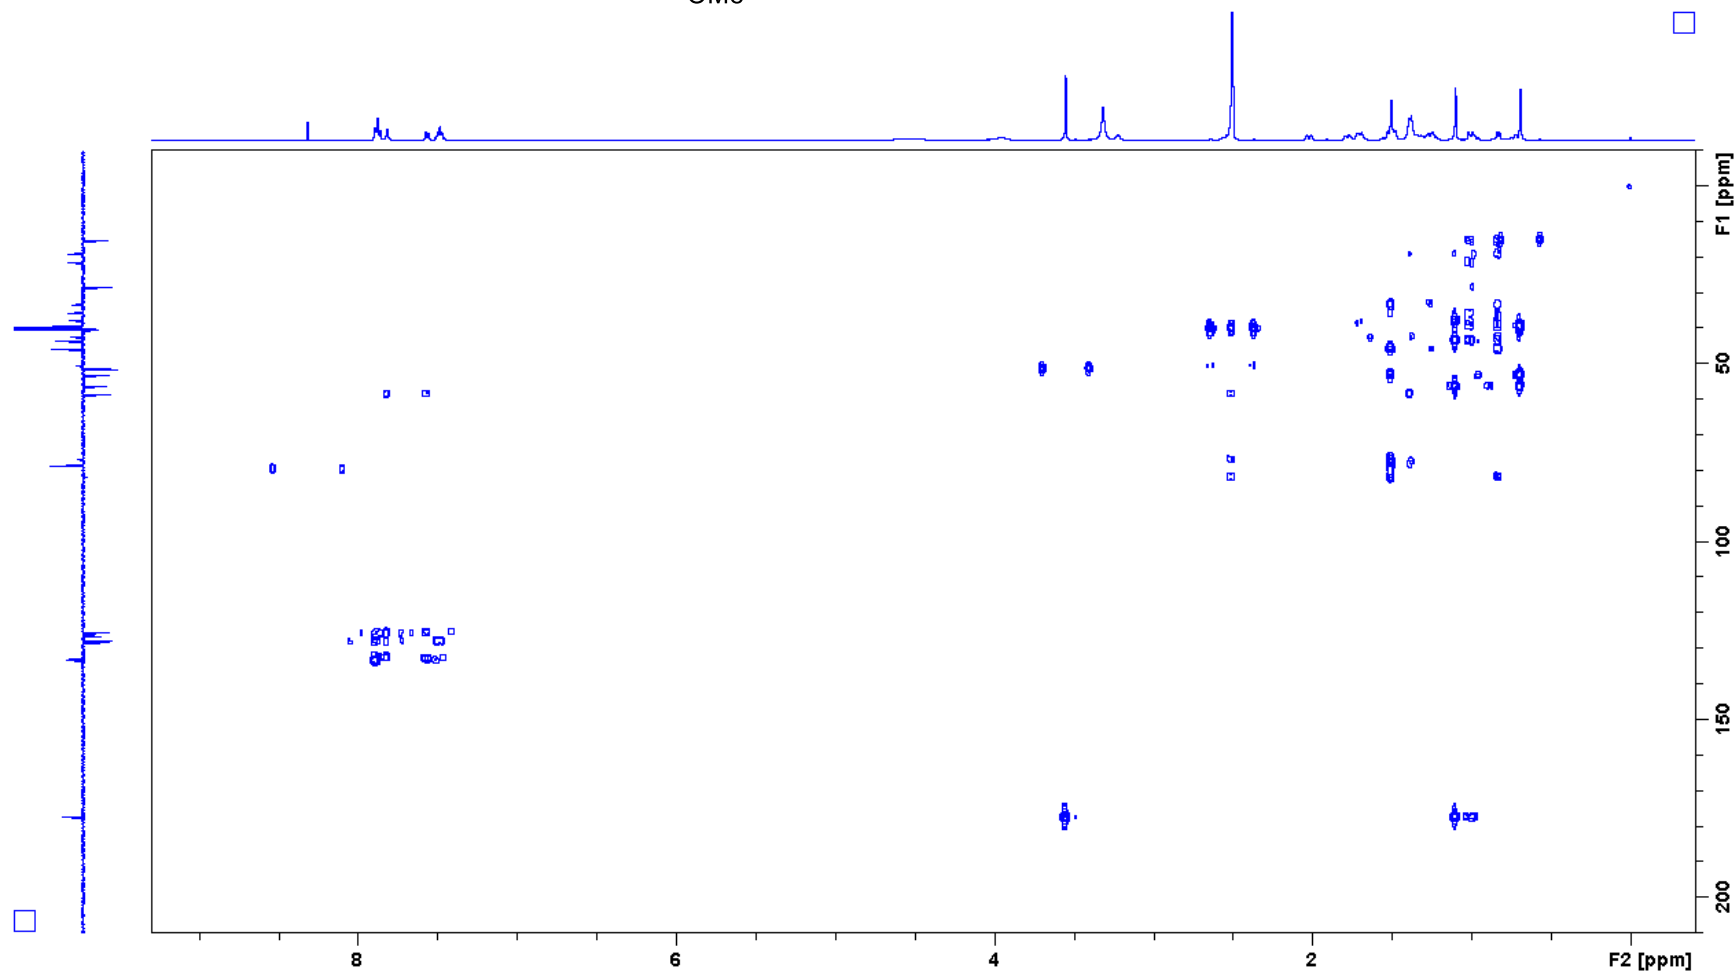

$^1\text{H}$ -NMR of compound (4*R*,6*aR*,7*R*,8*R*,9*S*,11*bS*)-methyl 7,8,9-trihydroxy-4,11*b*-dimethyl-8-(((naphthalen-1-ylmethyl)amino)methyl)tetradecahydro-6*a*,9-methanocyclohepta[*a*]naphthalene-4-carboxylate (**14**)

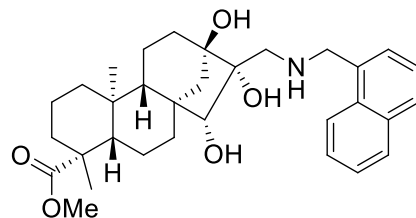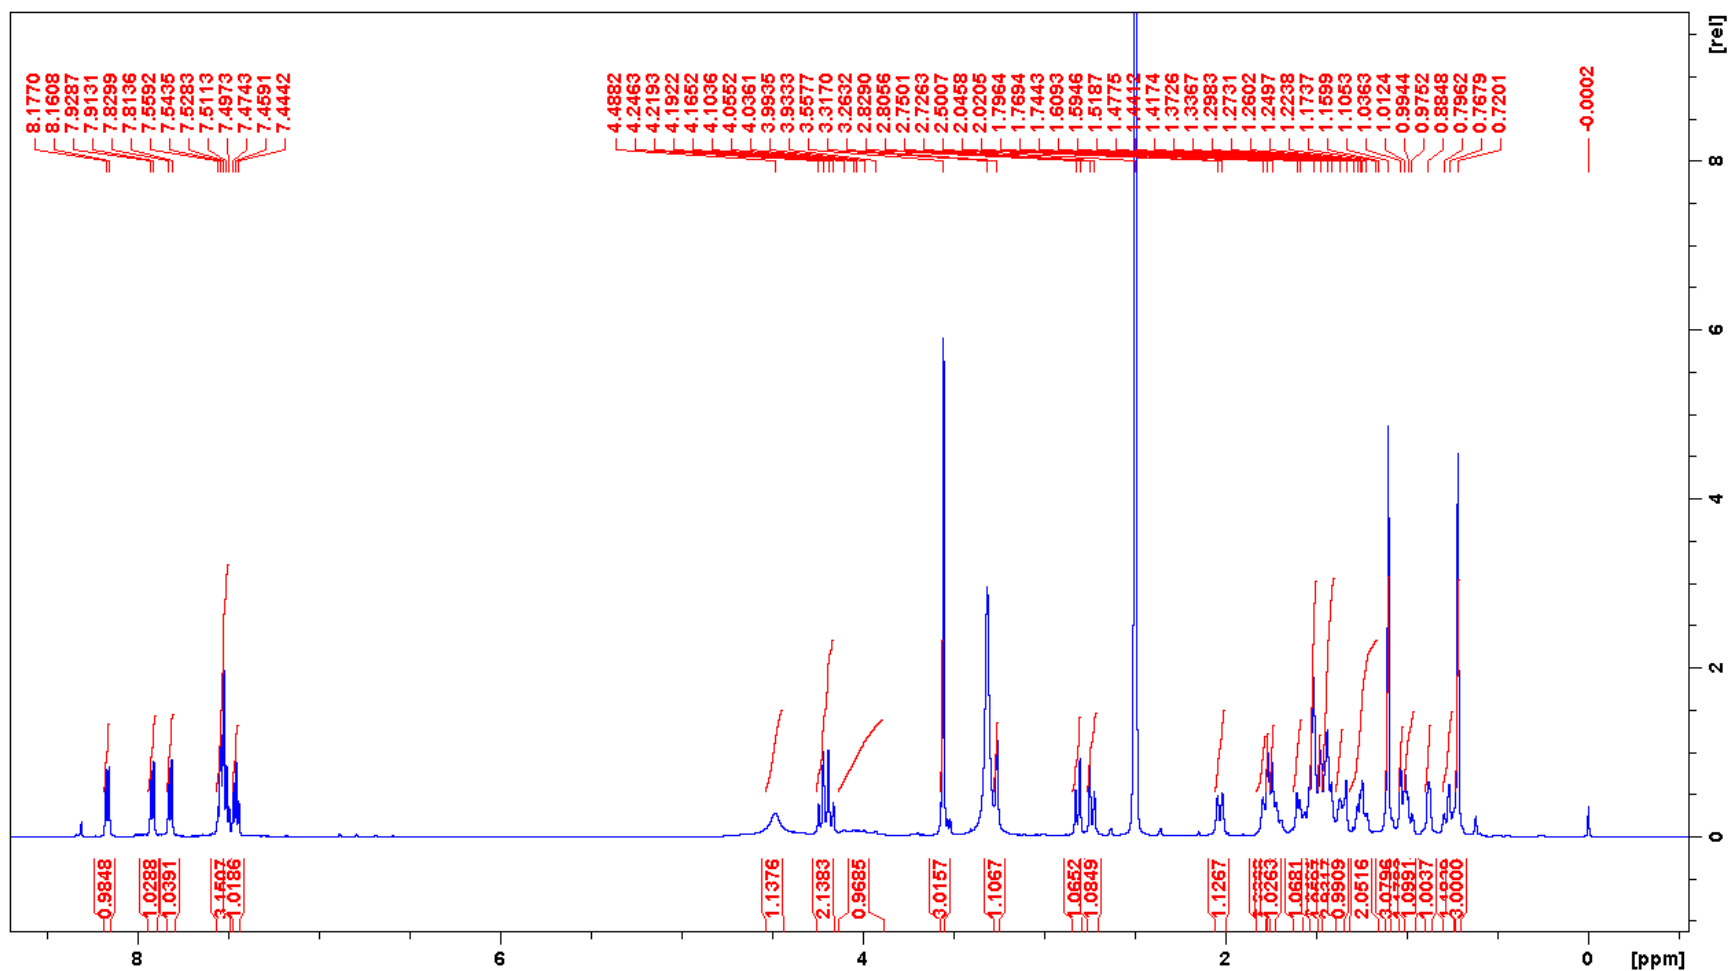



$^{13}\text{C}$ -NMR of compound (4*R*,6*aR*,7*R*,8*R*,9*S*,11*bS*)-methyl 7,8,9-trihydroxy-4,11*b*-dimethyl-8-(((naphthalen-1-ylmethyl)amino)methyl)tetradecahydro-6*a*,9-methanocyclohepta[*a*]naphthalene-4-carboxylate (**14**)

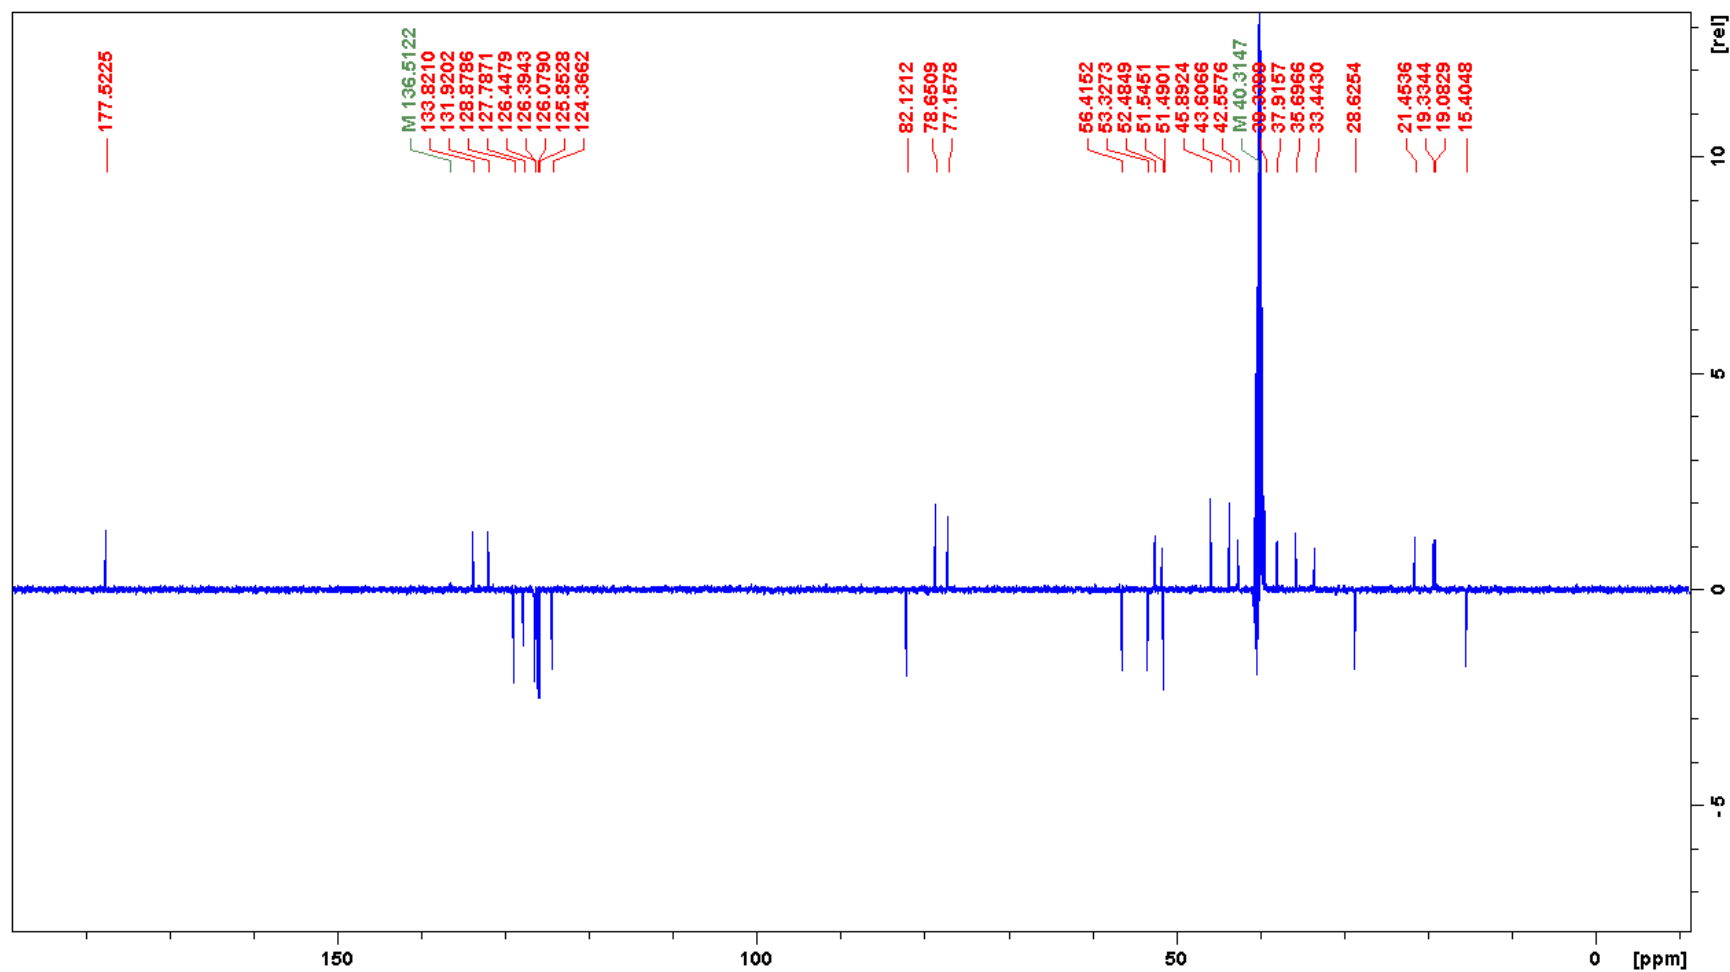

COSY of compound (4*R*,6*aR*,7*R*,8*R*,9*S*,11*bS*)-methyl 7,8,9-trihydroxy-4,11*b*-dimethyl-8-(((naphthalen-1-ylmethyl)amino)methyl)tetradecahydro-6*a*,9-methanocyclohepta[*a*]naphthalene-4-carboxylate (**14**)

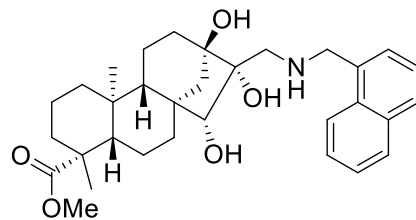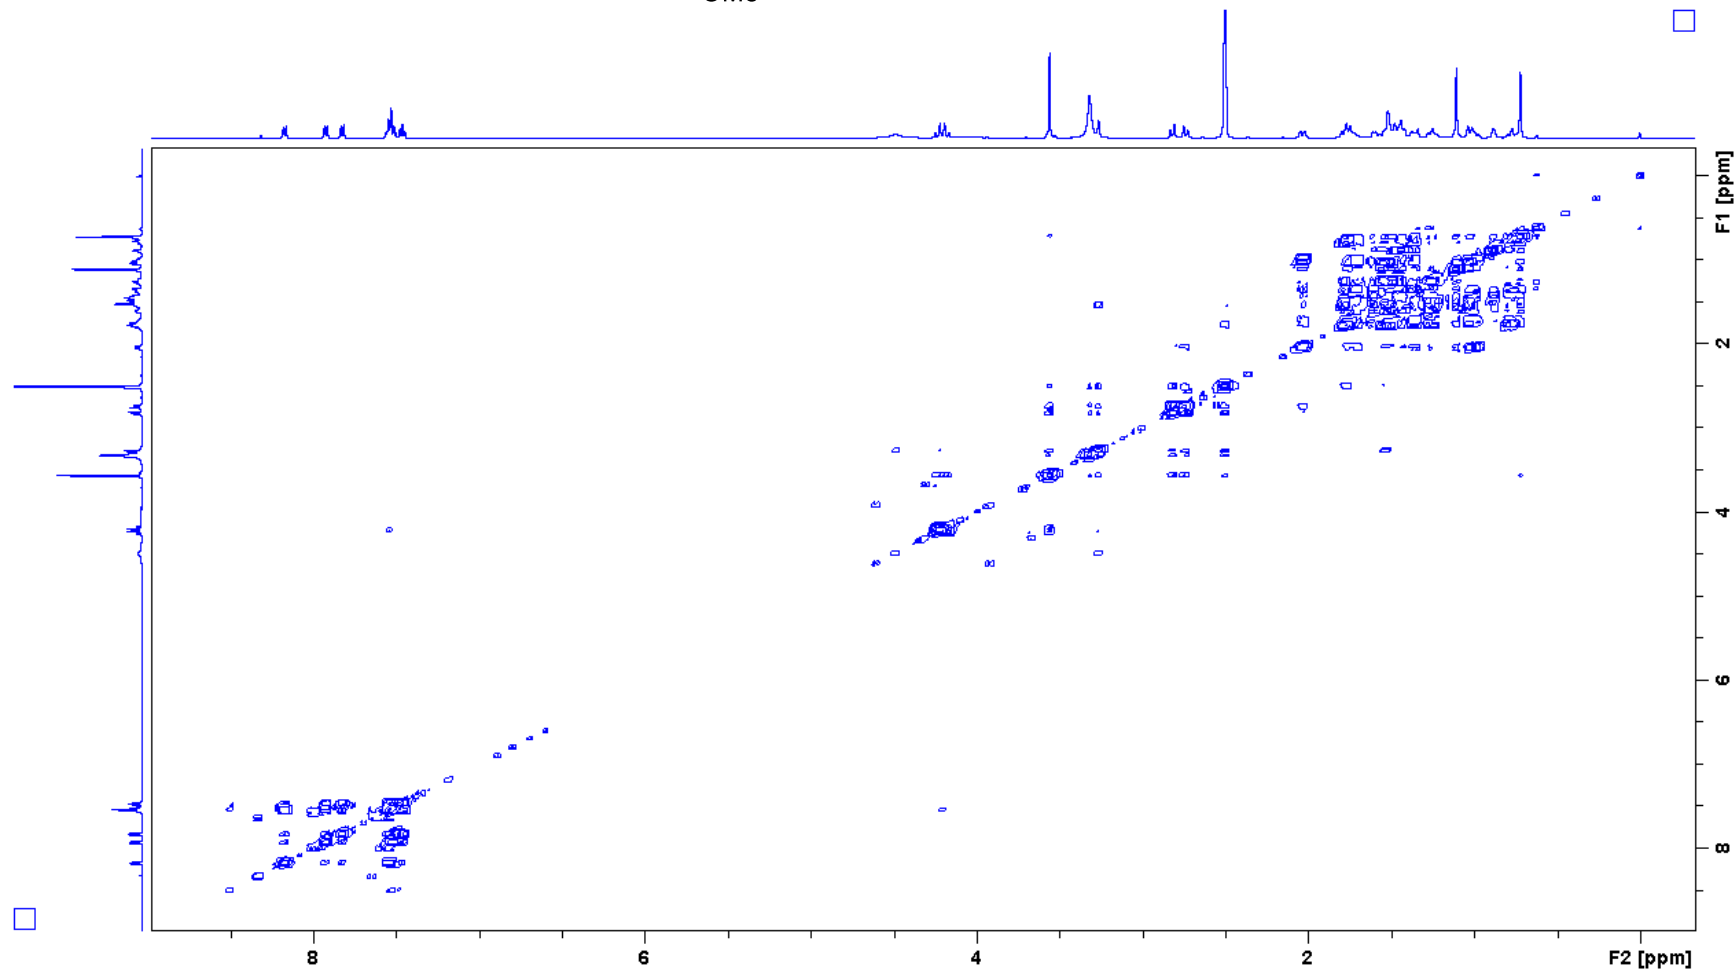

NOESY of compound (4*R*,6*aR*,7*R*,8*R*,9*S*,11*bS*)-methyl 7,8,9-trihydroxy-4,11*b*-dimethyl-8-(((naphthalen-1-ylmethyl)amino)methyl)tetradecahydro-6*a*,9-methanocyclohepta[*a*]naphthalene-4-carboxylate (**14**)

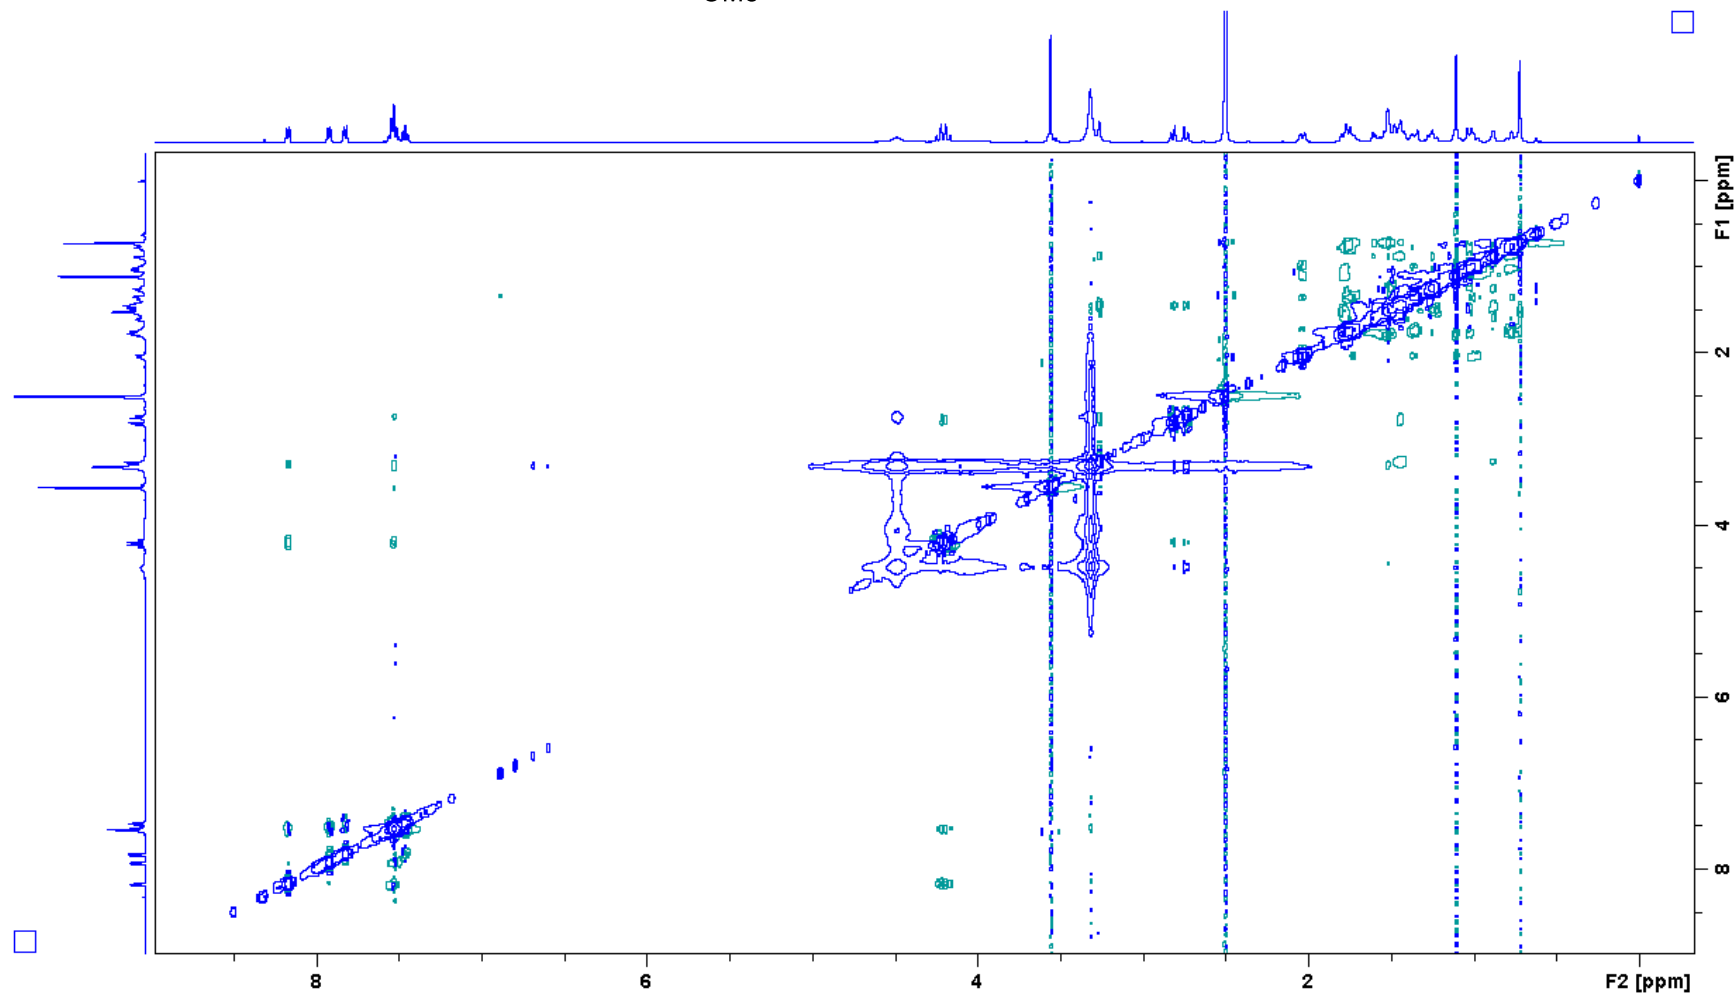

HSQC of compound (4*R*,6*aR*,7*R*,8*R*,9*S*,11*bS*)-methyl 7,8,9-trihydroxy-4,11*b*-dimethyl-8-(((naphthalen-1-ylmethyl)amino)methyl)tetradecahydro-6*a*,9-methanocyclohepta[*a*]naphthalene-4-carboxylate (**14**)

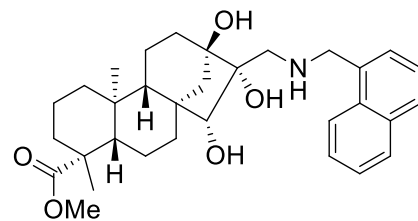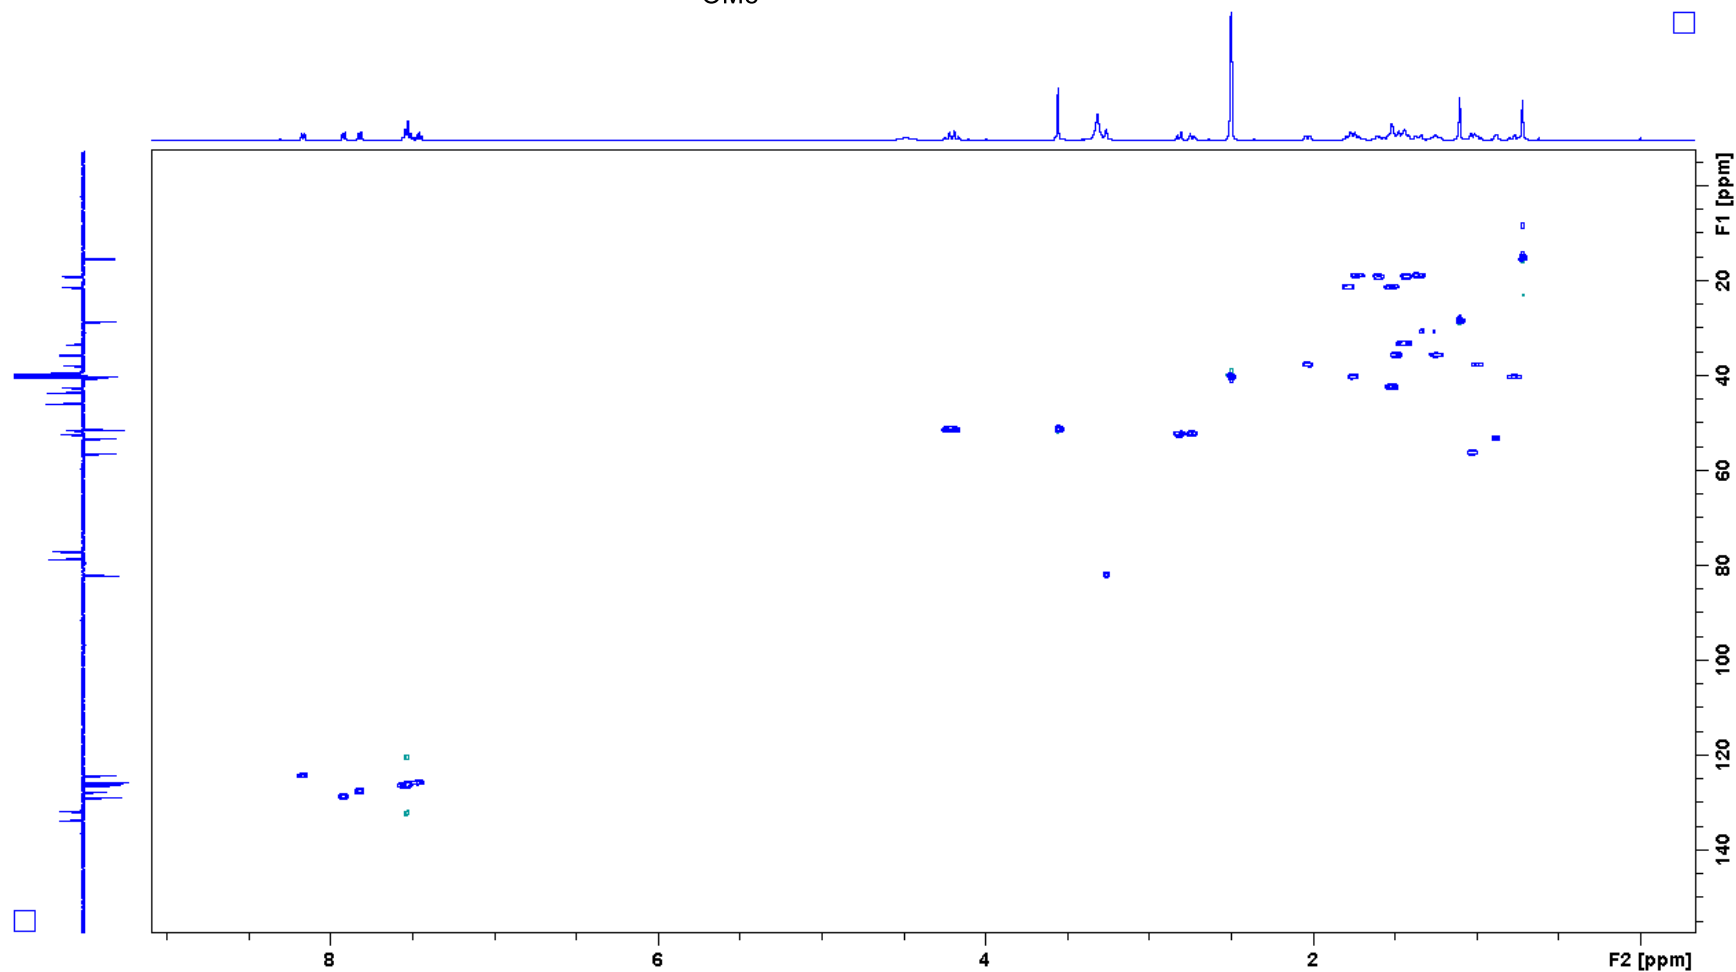

HMBC of compound (4*R*,6*aR*,7*R*,8*R*,9*S*,11*bS*)-methyl 7,8,9-trihydroxy-4,11*b*-dimethyl-8-(((naphthalen-1-ylmethyl)amino)methyl)tetradecahydro-6*a*,9-methanocyclohepta[*a*]naphthalene-4-carboxylate (**14**)

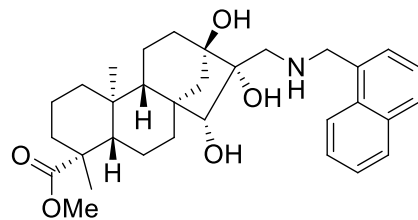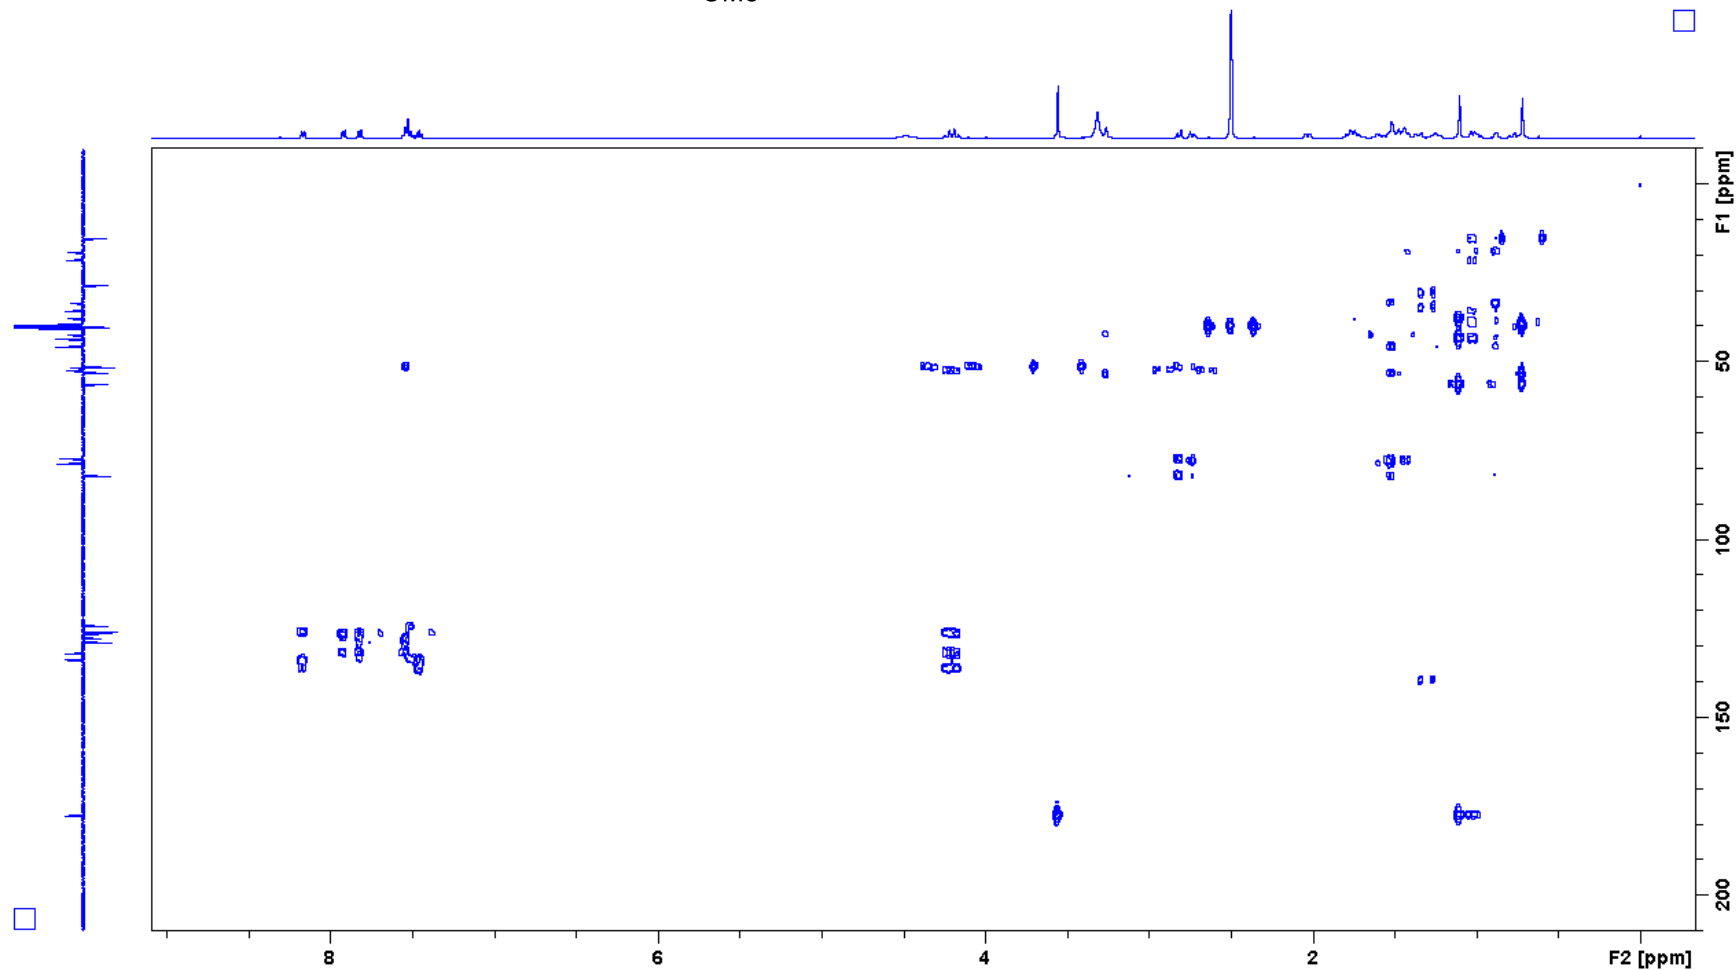

$^1\text{H}$ -NMR of compound (4*R*,6*aR*,7*R*,8*R*,9*S*,11*bS*)-methyl 7,8,9-trihydroxy-4,11*b*-dimethyl-8-(((*R*)-1-phenylpropyl)amino)methyl)tetradecahydro-6*a*,9-methanocyclohepta[*a*]naphthalene-4-carboxylate (**15**)

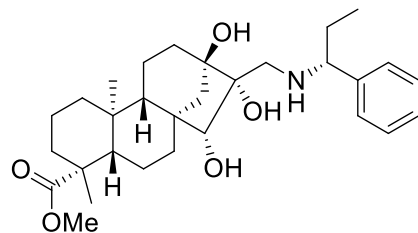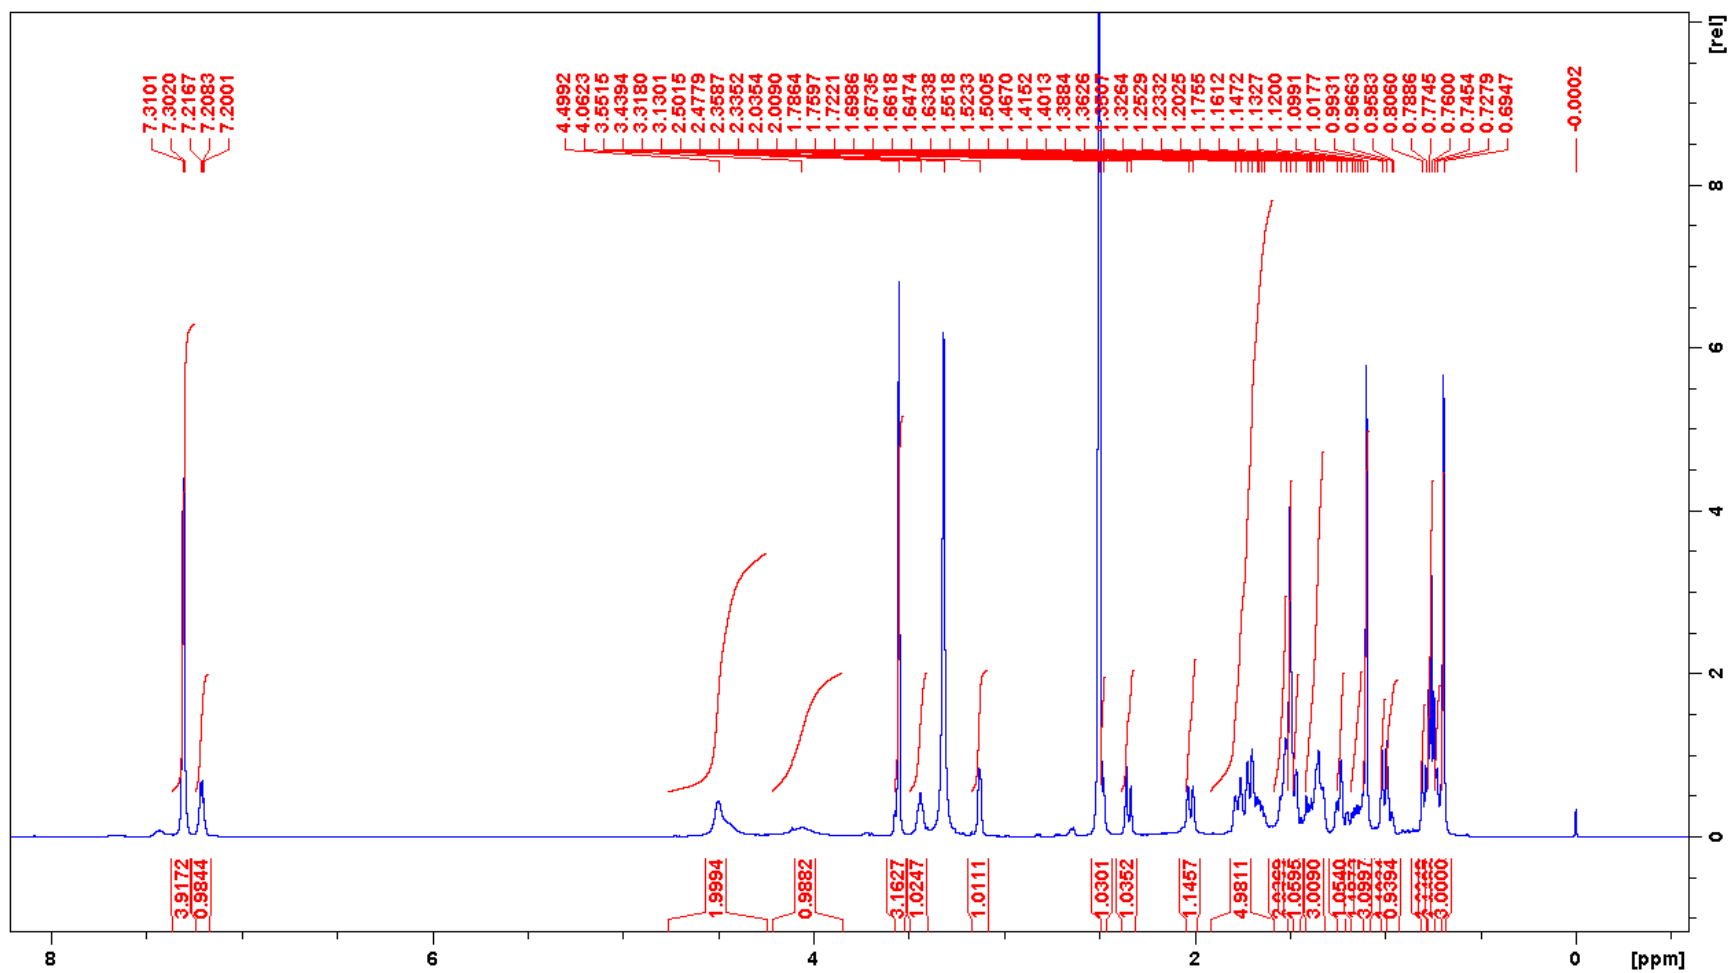

$^{13}\text{C}$ -NMR of compound (4*R*,6*aR*,7*R*,8*R*,9*S*,11*bS*)-methyl 7,8,9-trihydroxy-4,11*b*-dimethyl-8-(((*R*)-1-phenylpropyl)amino)methyl)tetradecahydro-6*a*,9-methanocyclohepta[*a*]naphthalene-4-carboxylate (**15**)

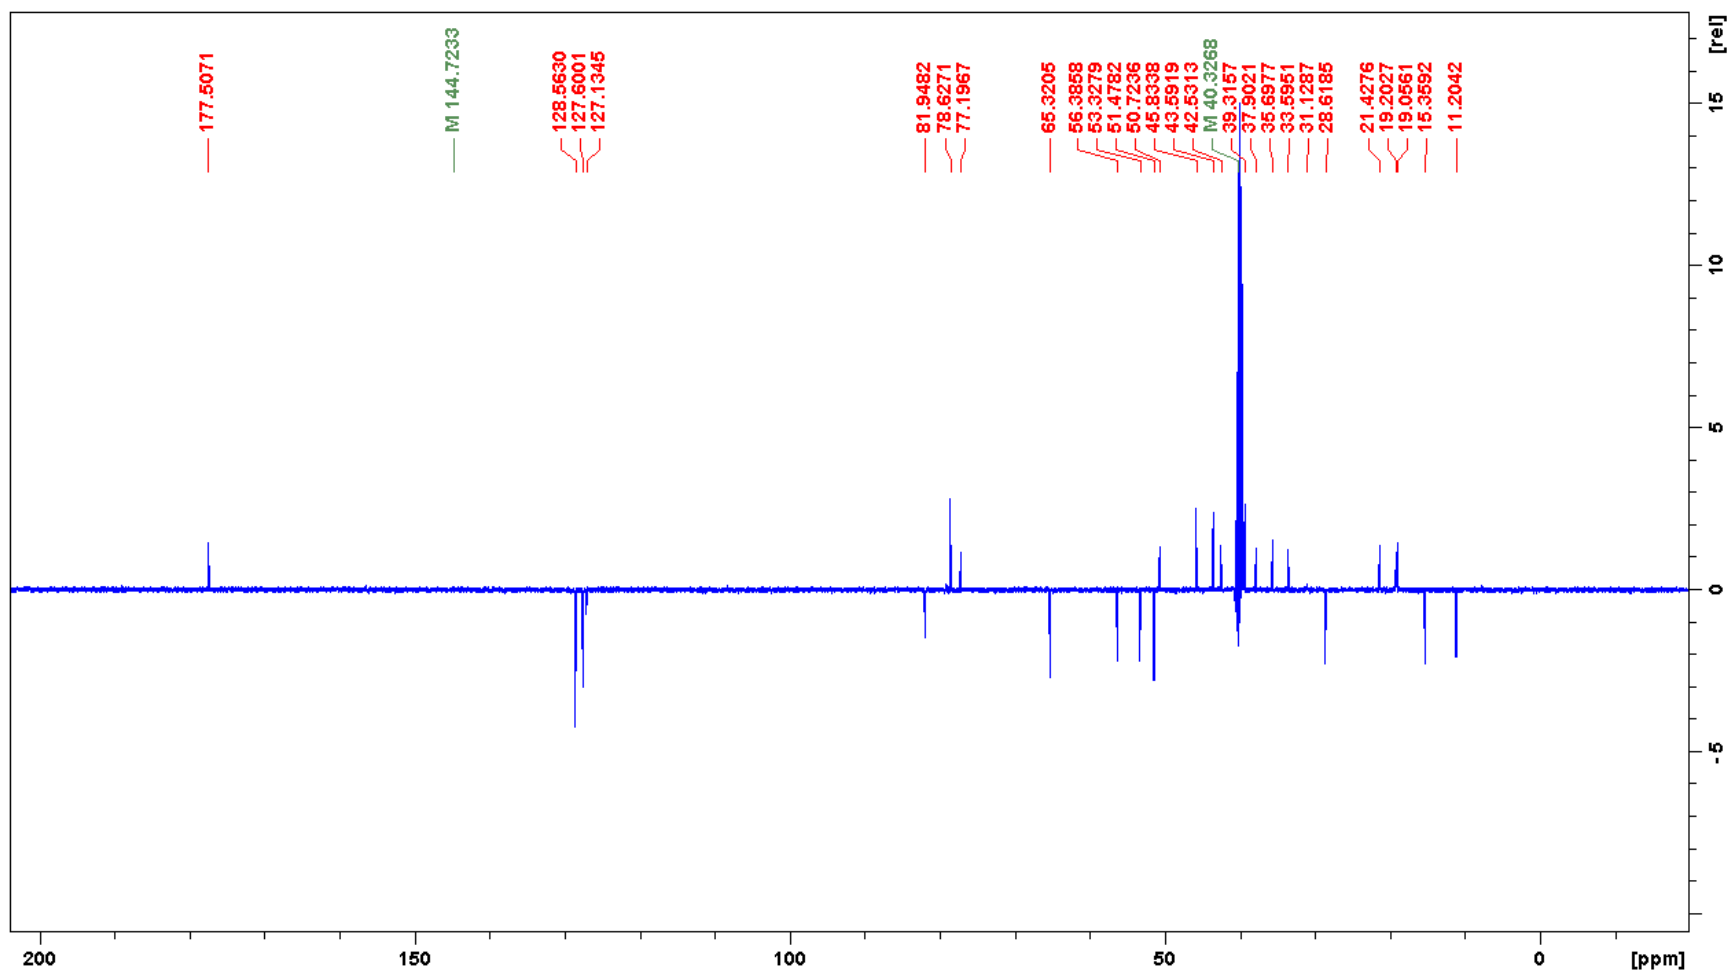

COSY of compound (4*R*,6*aR*,7*R*,8*R*,9*S*,11*bS*)-methyl 7,8,9-trihydroxy-4,11*b*-dimethyl-8-(((*R*)-1-phenylpropyl)amino)methyl)tetradecahydro-6*a*,9-methanocyclohepta[*a*]naphthalene-4-carboxylate (**15**)

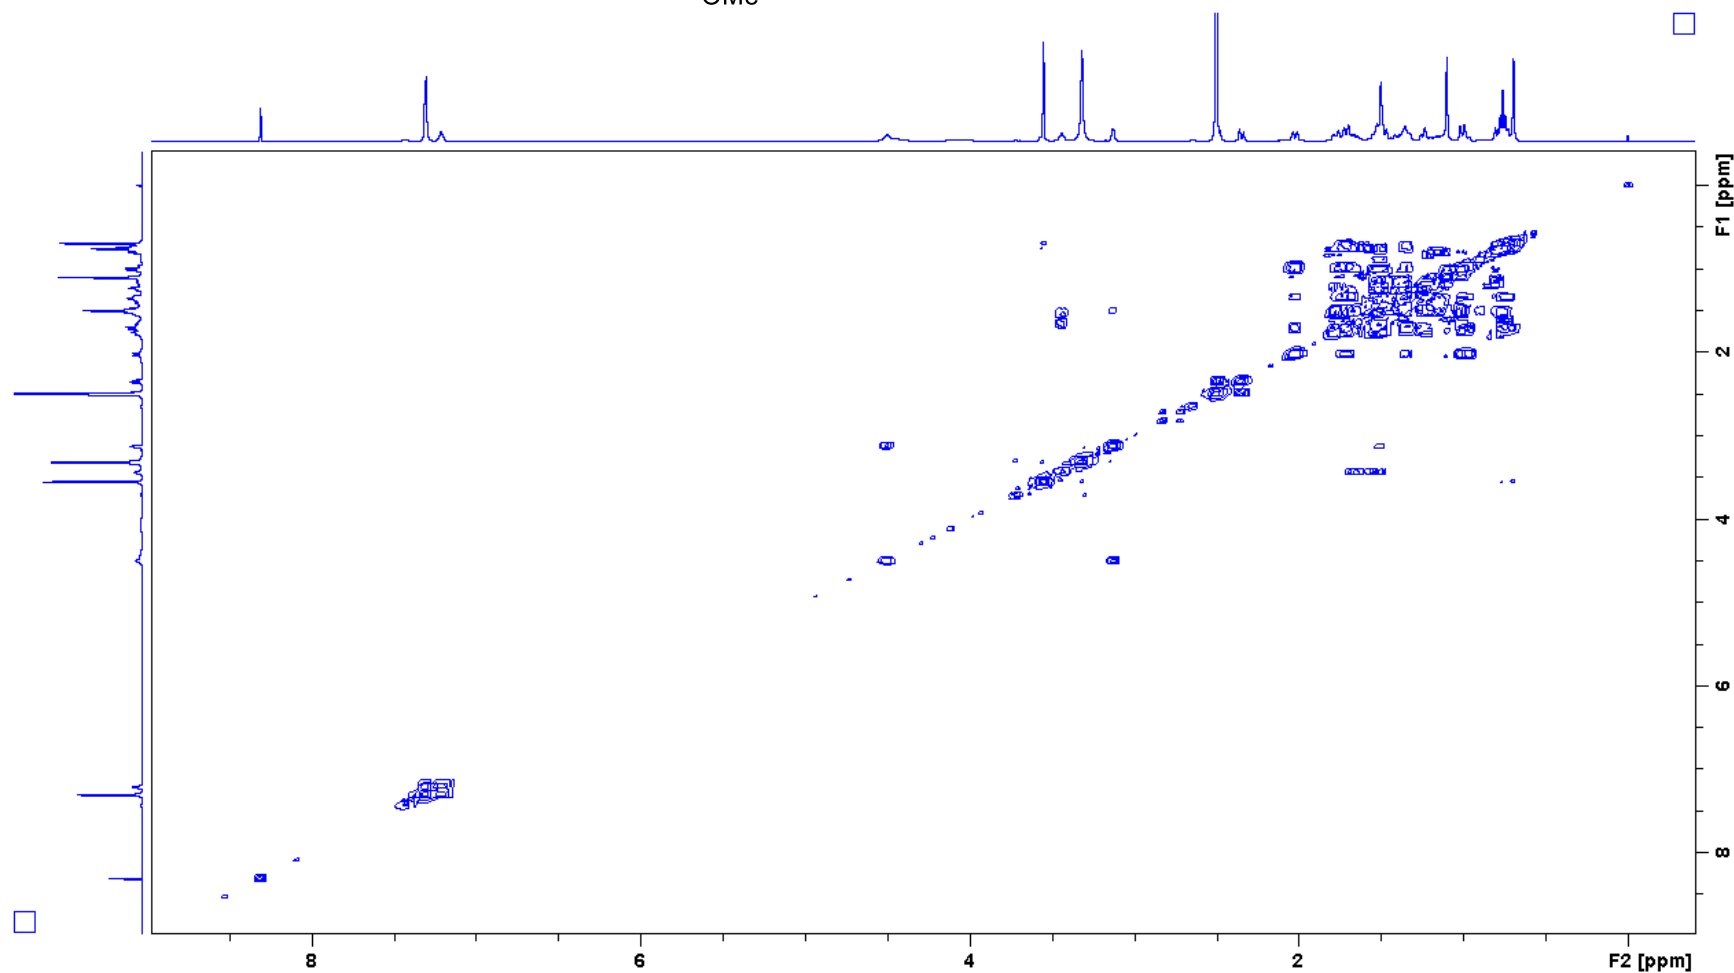



NOESY of compound (4*R*,6*aR*,7*R*,8*R*,9*S*,11*bS*)-methyl 7,8,9-trihydroxy-4,11*b*-dimethyl-8-(((*R*)-1-phenylpropyl)amino)methyl)tetradecahydro-6*a*,9-methanocyclohepta[*a*]naphthalene-4-carboxylate (**15**)

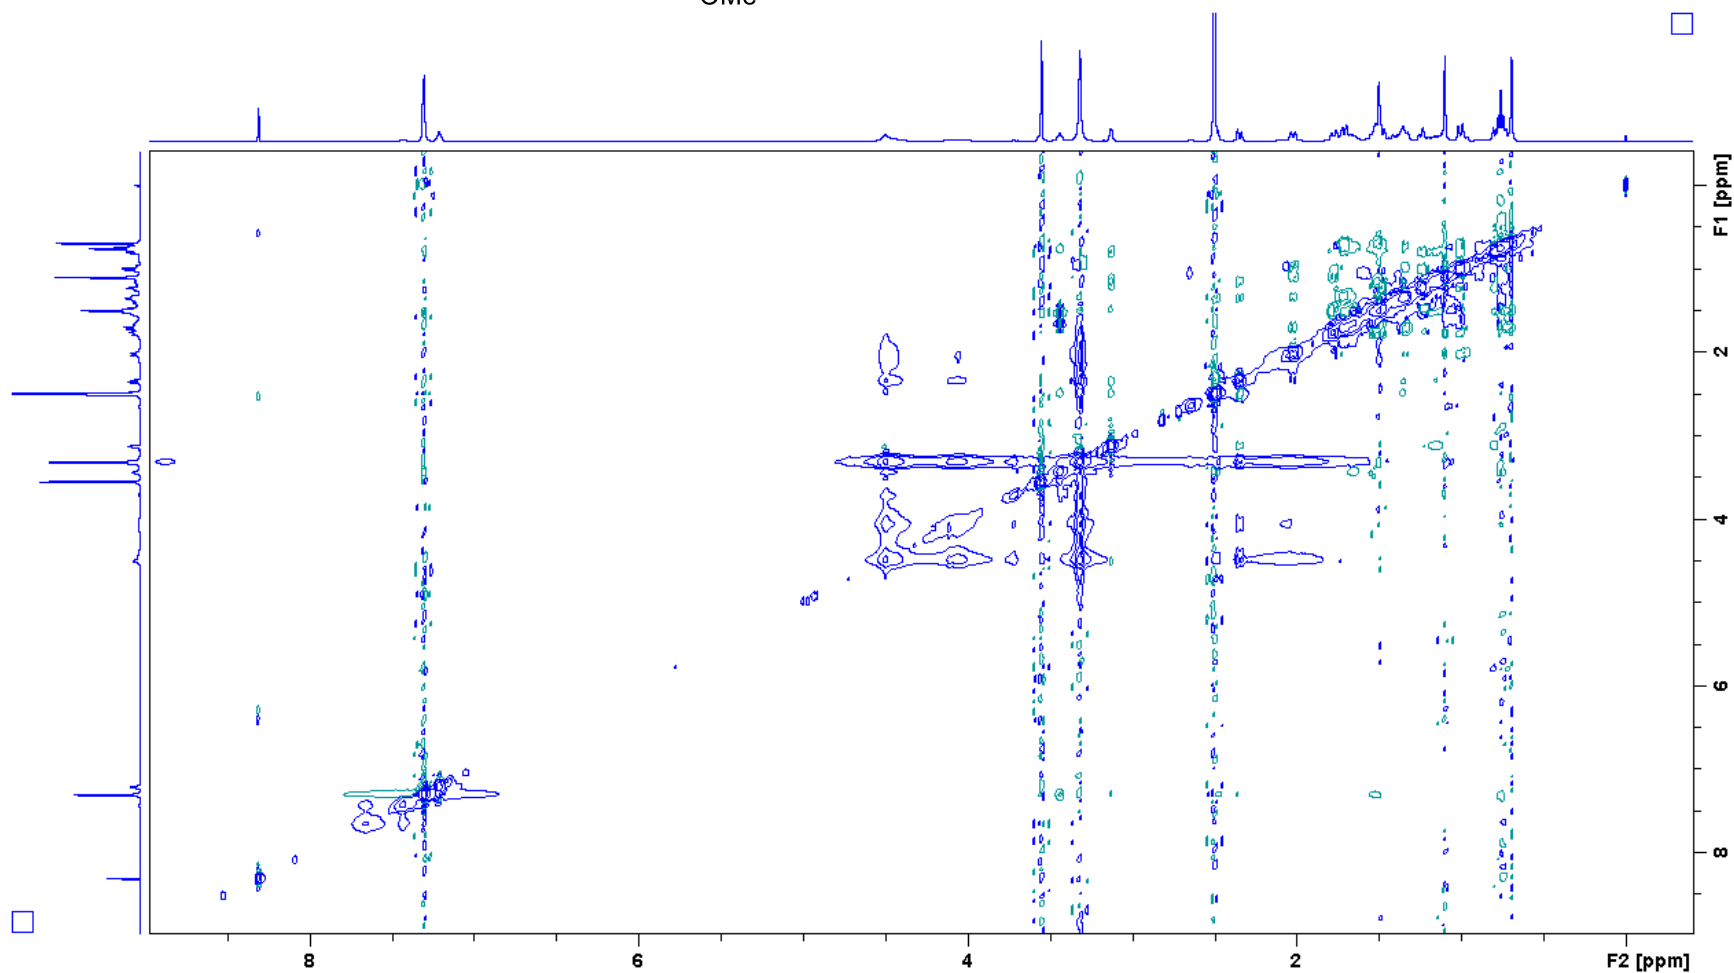

HSQC of compound (4*R*,6*aR*,7*R*,8*R*,9*S*,11*bS*)-methyl 7,8,9-trihydroxy-4,11*b*-dimethyl-8-(((*R*)-1-phenylpropyl)amino)methyl)tetradecahydro-6*a*,9-methanocyclohepta[*a*]naphthalene-4-carboxylate (**15**)

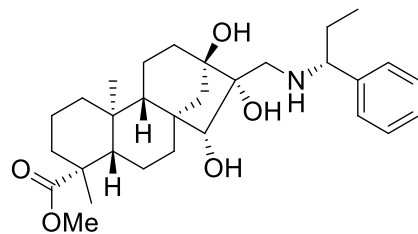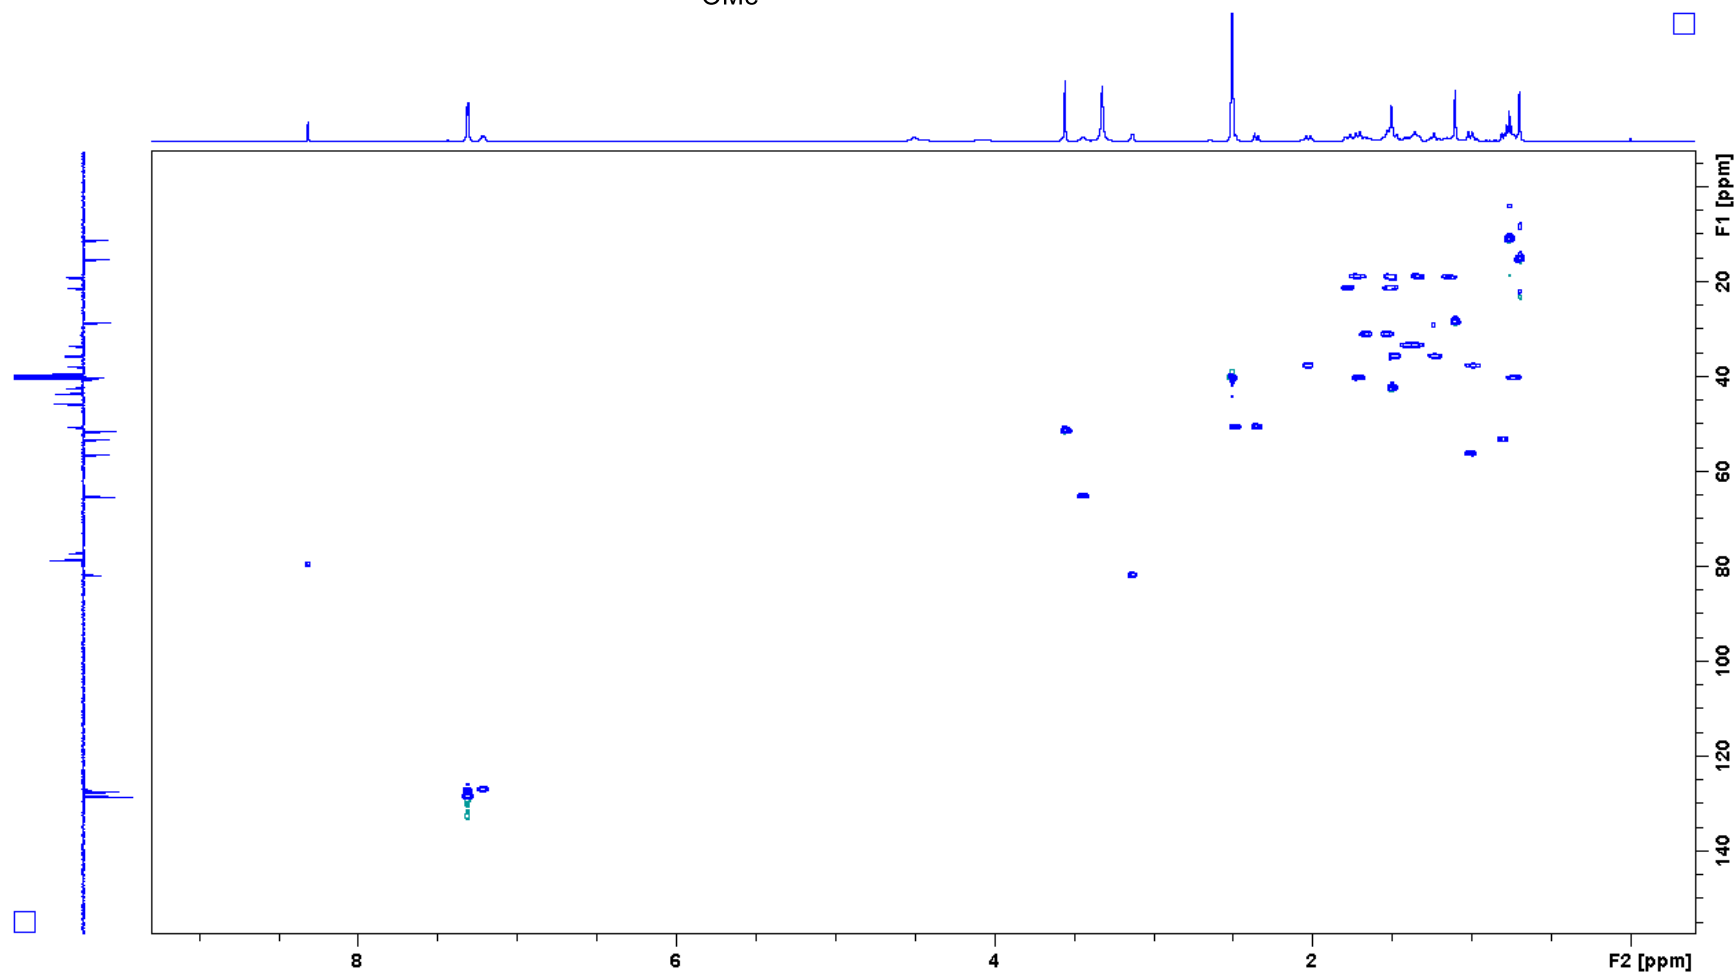

HMBC of compound (4*R*,6*aR*,7*R*,8*R*,9*S*,11*bS*)-methyl 7,8,9-trihydroxy-4,11*b*-dimethyl-8-(((*R*)-1-phenylpropyl)amino)methyl)tetradecahydro-6*a*,9-methanocyclohepta[*a*]naphthalene-4-carboxylate (**15**)

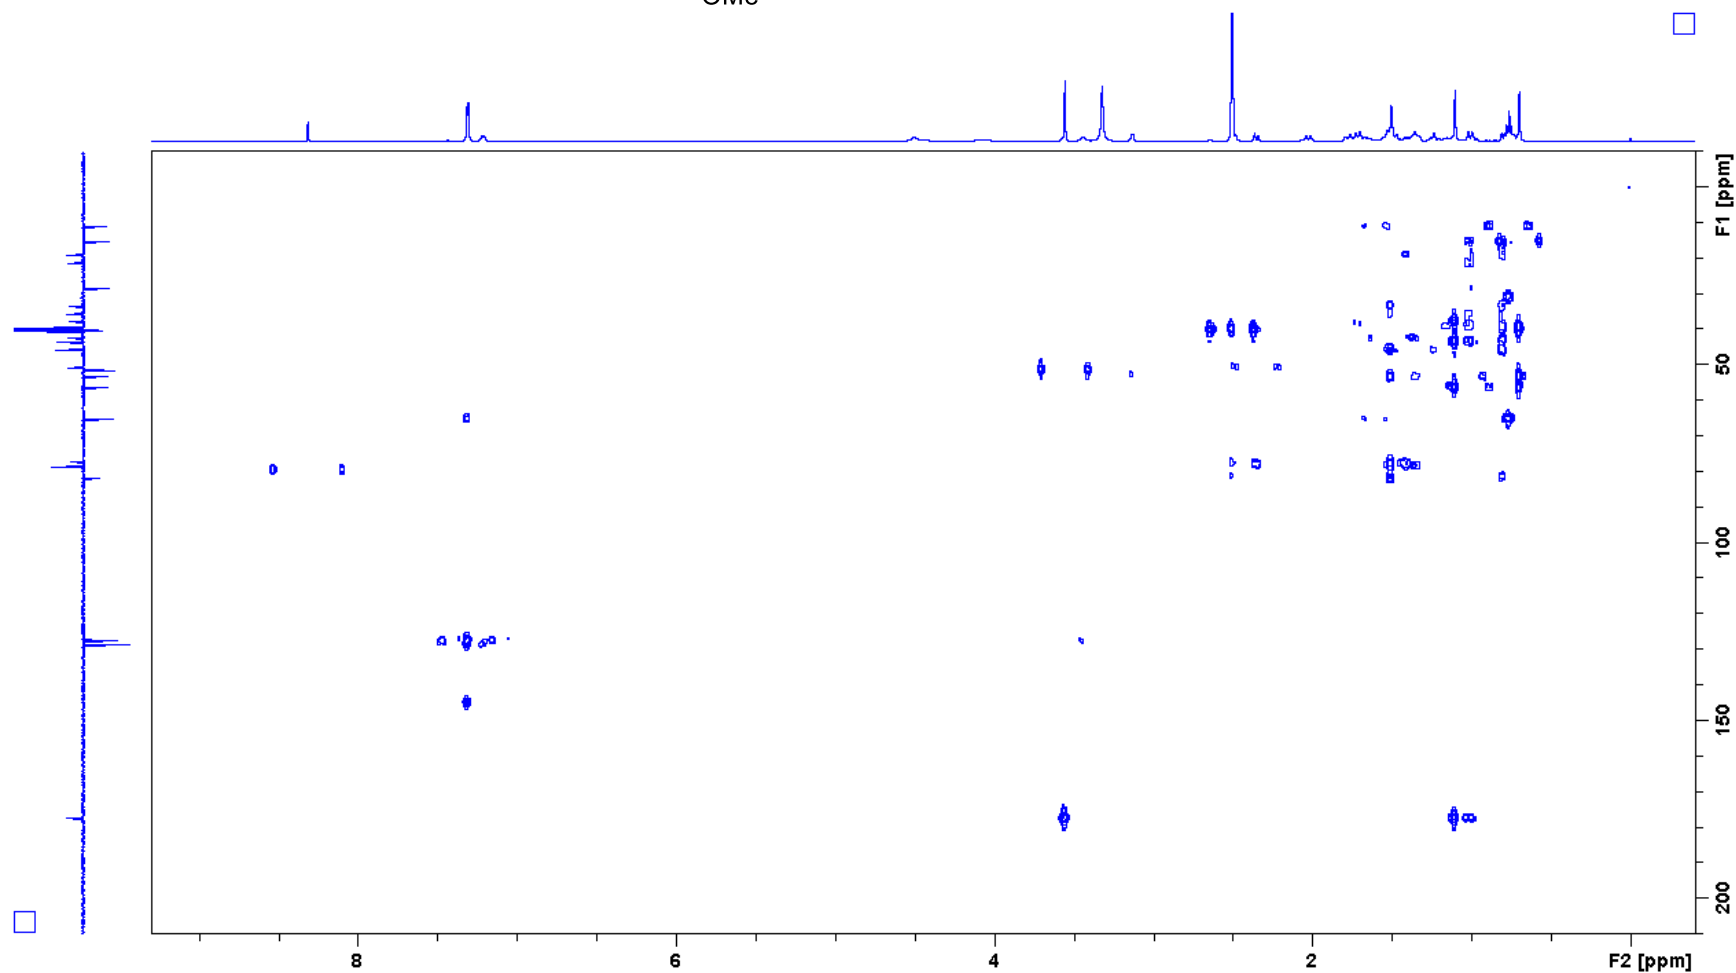

$^1\text{H}$ -NMR of compound (4*R*,6*aR*,7*R*,8*R*,9*S*,11*bS*)-methyl 7,8,9-trihydroxy-4,11*b*-dimethyl-8-(((*S*)-1-phenylpropyl)amino)methyl)tetradecahydro-6*a*,9-methanocyclohepta[*a*]naphthalene-4-carboxylate (**16**)

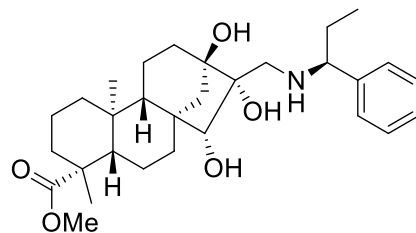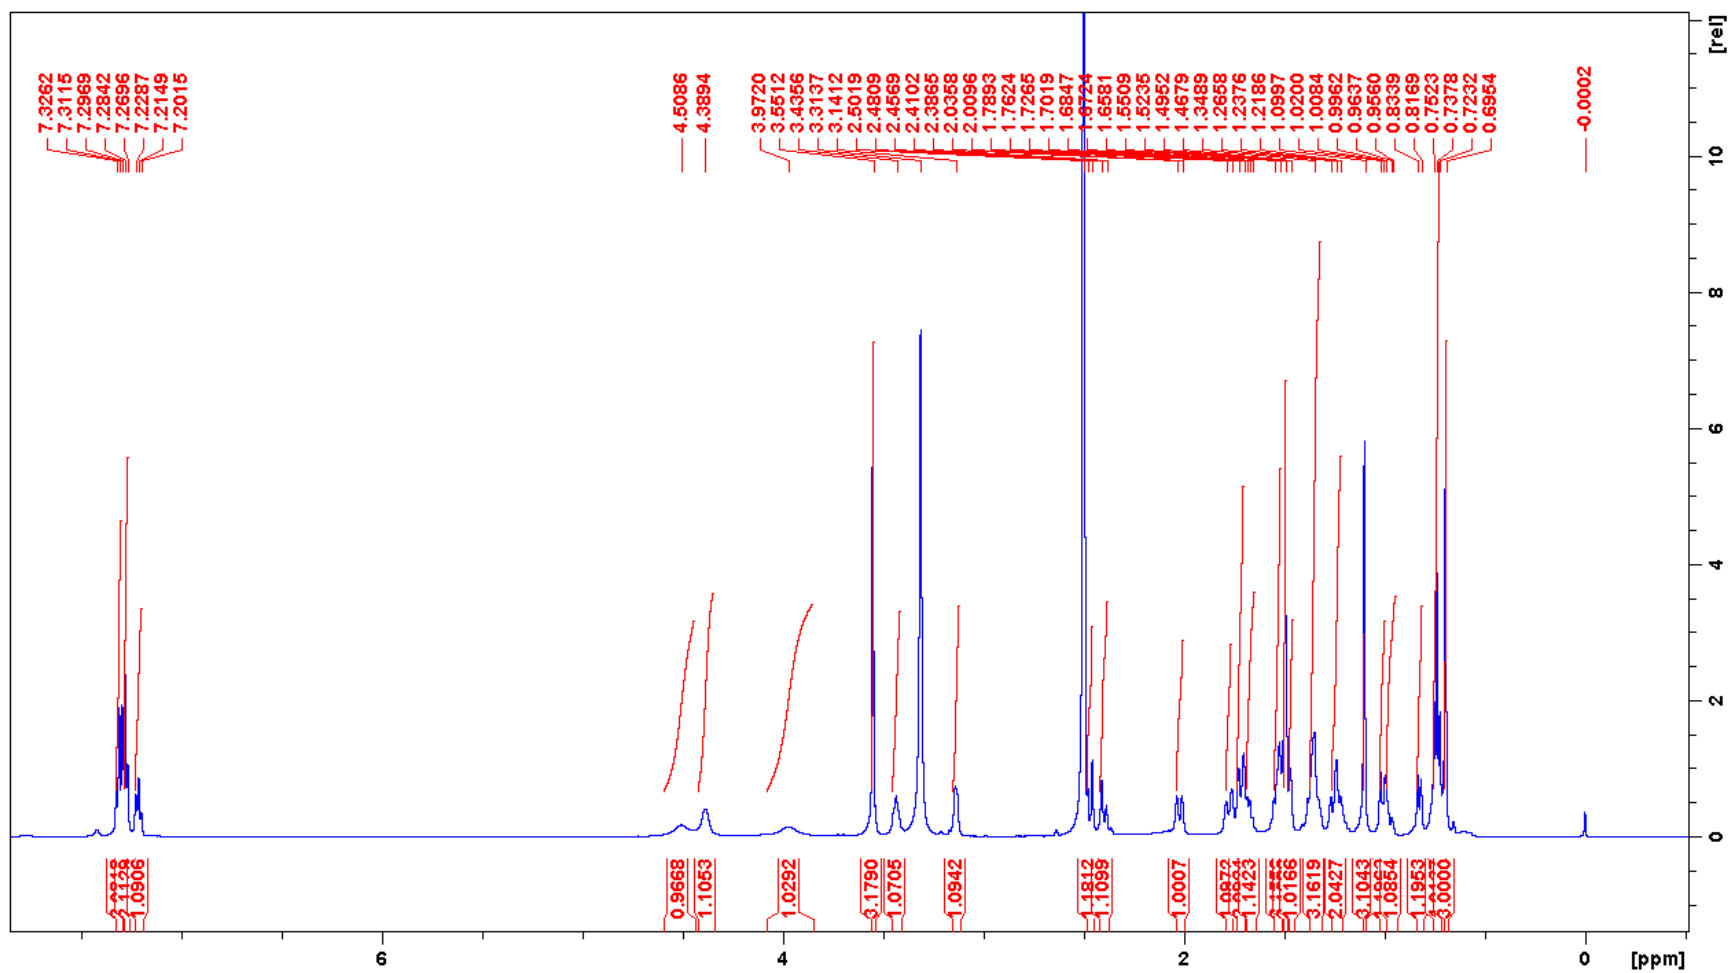

$^{13}\text{C}$ -NMR of compound (4*R*,6*aR*,7*R*,8*R*,9*S*,11*bS*)-methyl 7,8,9-trihydroxy-4,11*b*-dimethyl-8-(((*S*)-1-phenylpropyl)amino)methyl)tetradecahydro-6*a*,9-methanocyclohepta[*a*]naphthalene-4-carboxylate (**16**)

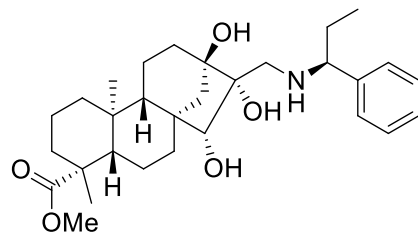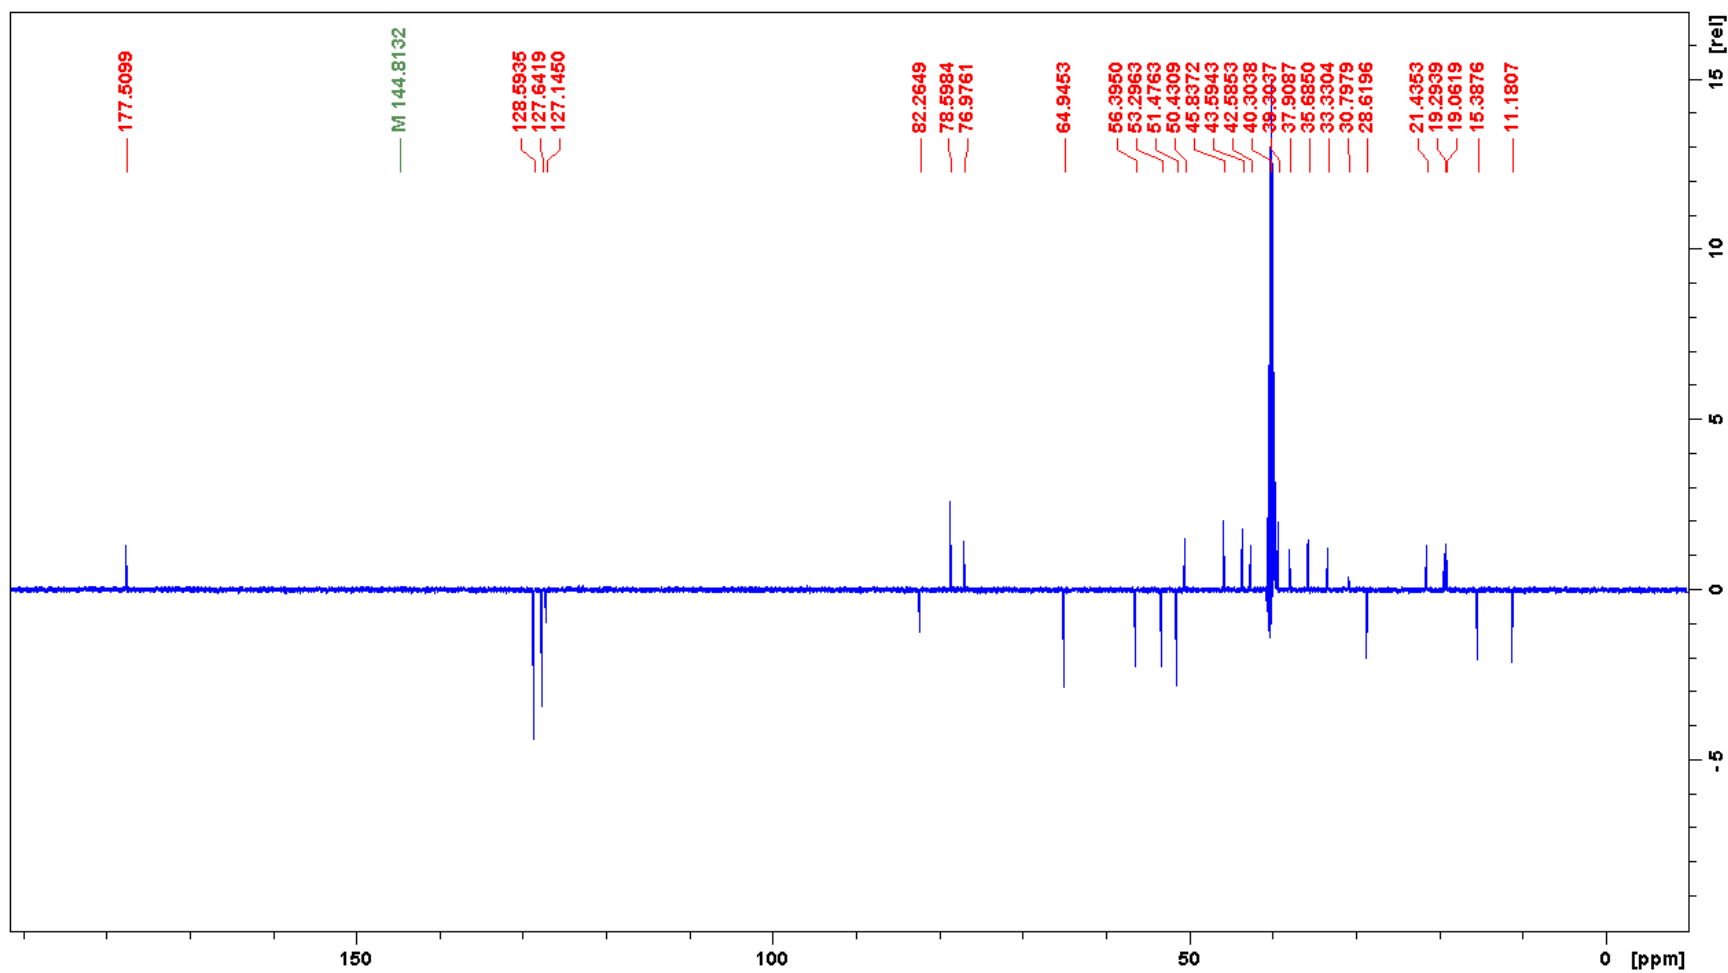

COSY of compound (4*R*,6*aR*,7*R*,8*R*,9*S*,11*bS*)-methyl 7,8,9-trihydroxy-4,11*b*-dimethyl-8-(((*S*)-1-phenylpropyl)amino)methyl)tetradecahydro-6*a*,9-methanocyclohepta[*a*]naphthalene-4-carboxylate (**16**)

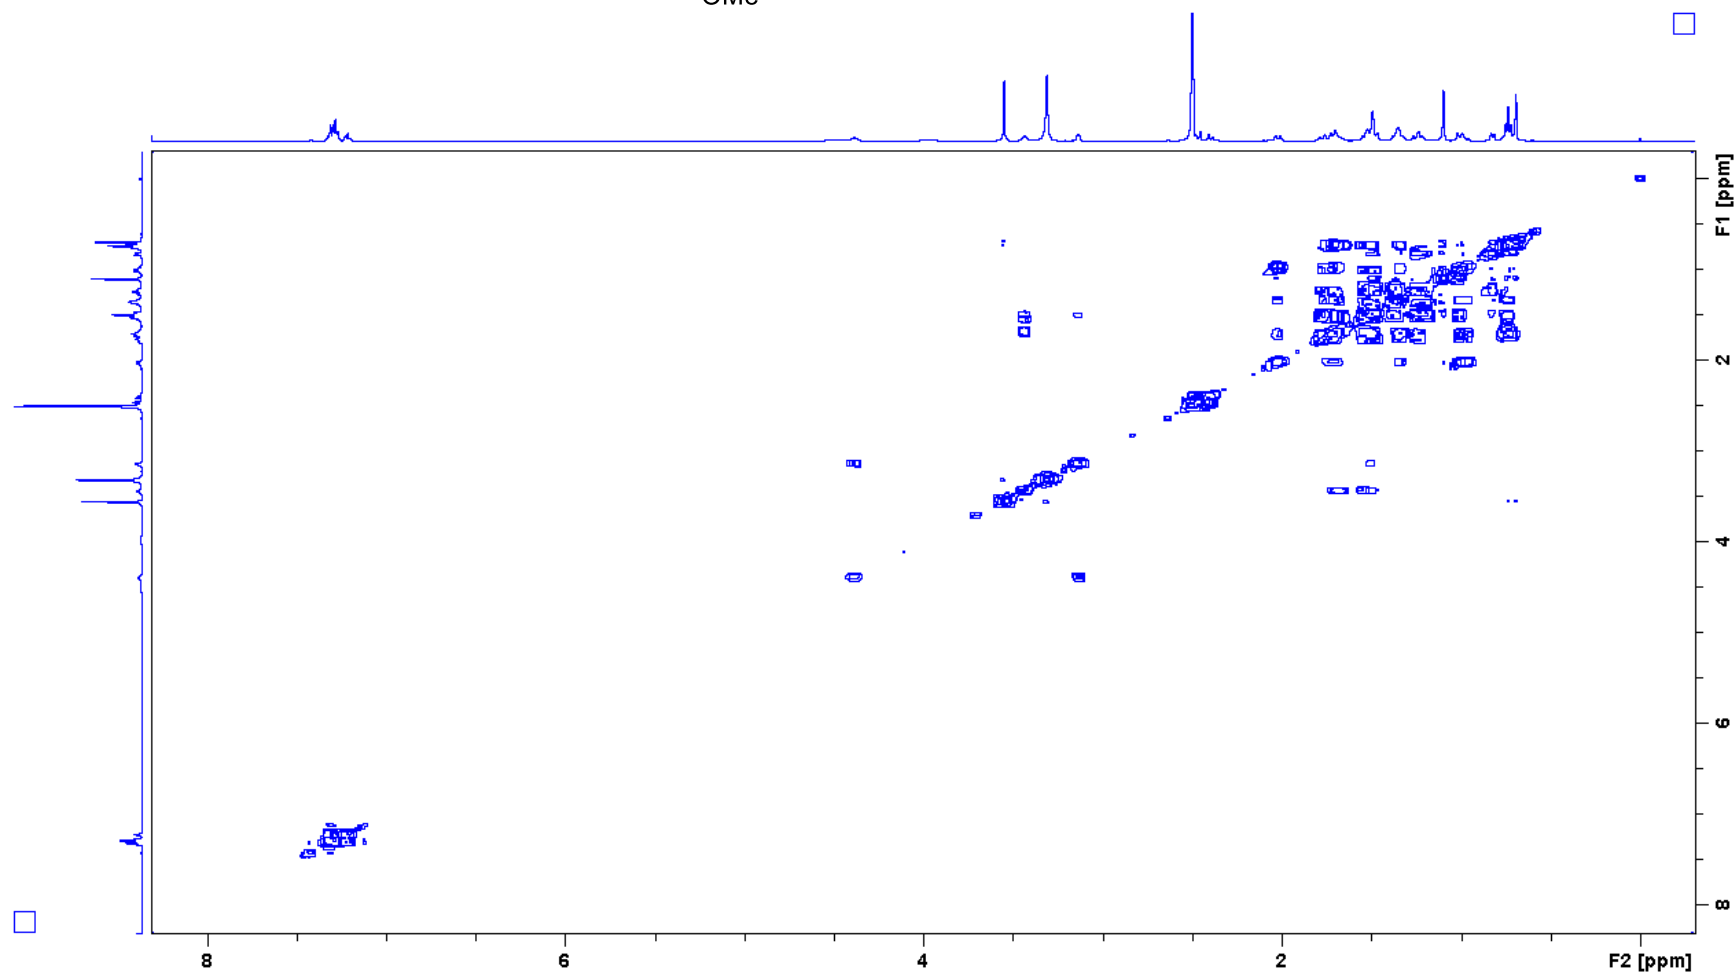

NOESY of compound (4*R*,6*aR*,7*R*,8*R*,9*S*,11*bS*)-methyl 7,8,9-trihydroxy-4,11*b*-dimethyl-8-(((*S*)-1-phenylpropyl)amino)methyl)tetradecahydro-6*a*,9-methanocyclohepta[*a*]naphthalene-4-carboxylate (**16**)

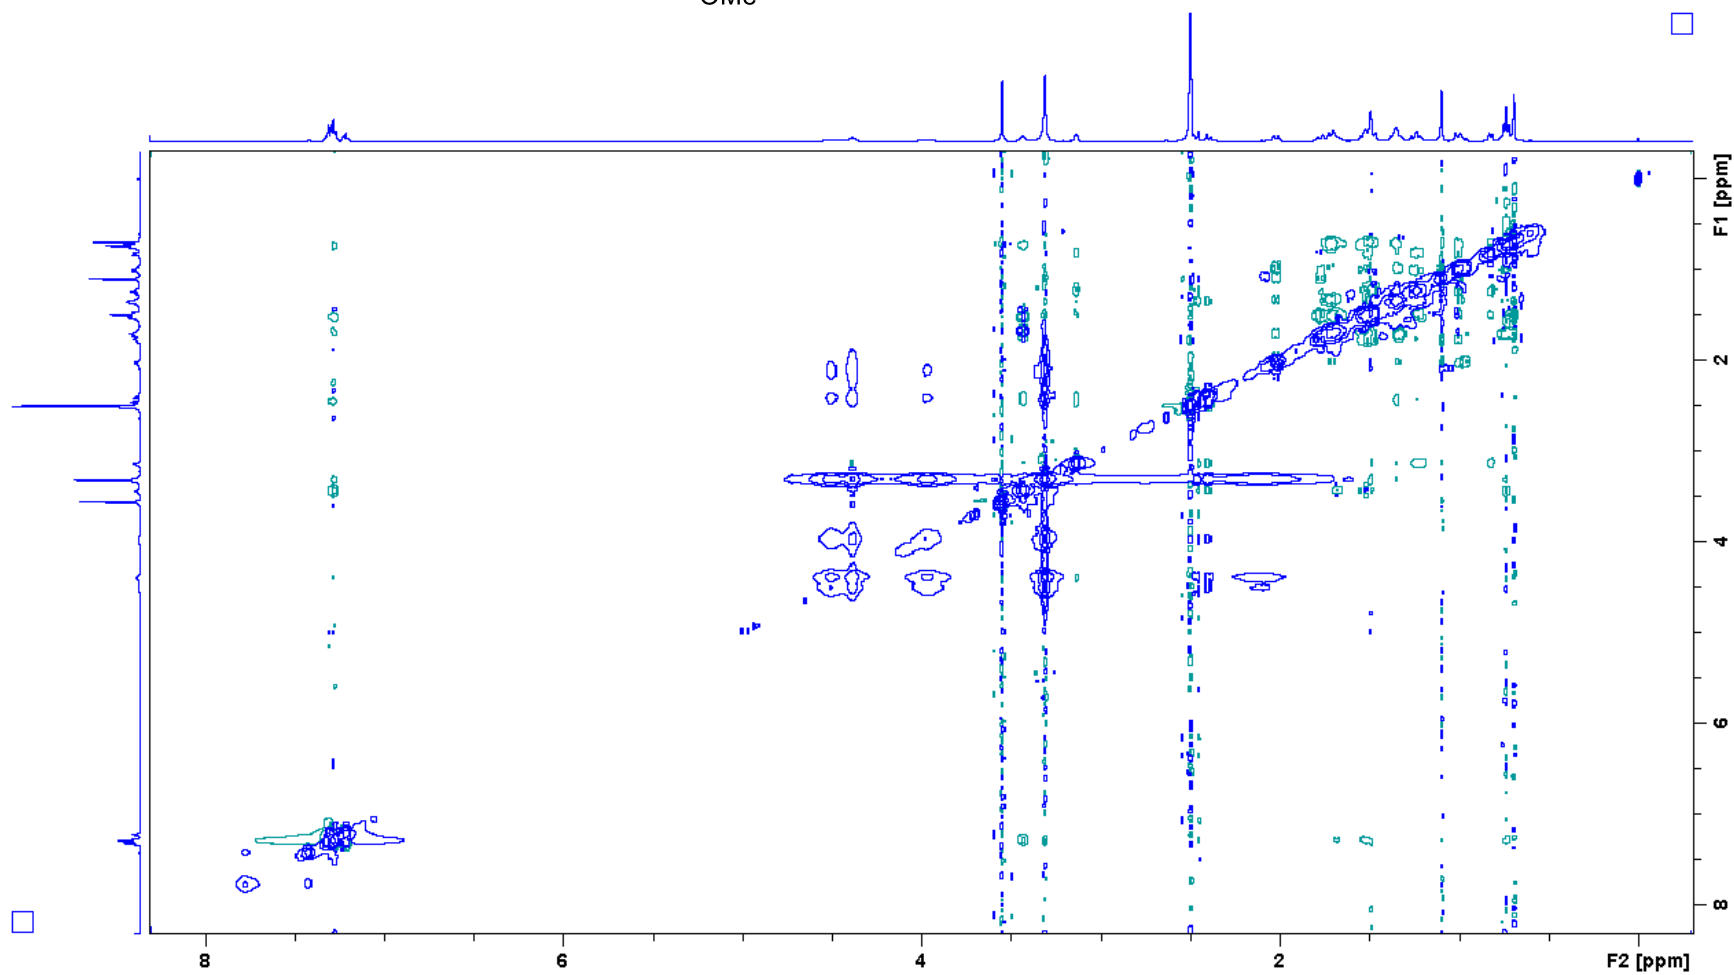

HSQC of compound (4*R*,6*aR*,7*R*,8*R*,9*S*,11*bS*)-methyl 7,8,9-trihydroxy-4,11*b*-dimethyl-8-(((*S*)-1-phenylpropyl)amino)methyl)tetradecahydro-6*a*,9-methanocyclohepta[*a*]naphthalene-4-carboxylate (**16**)

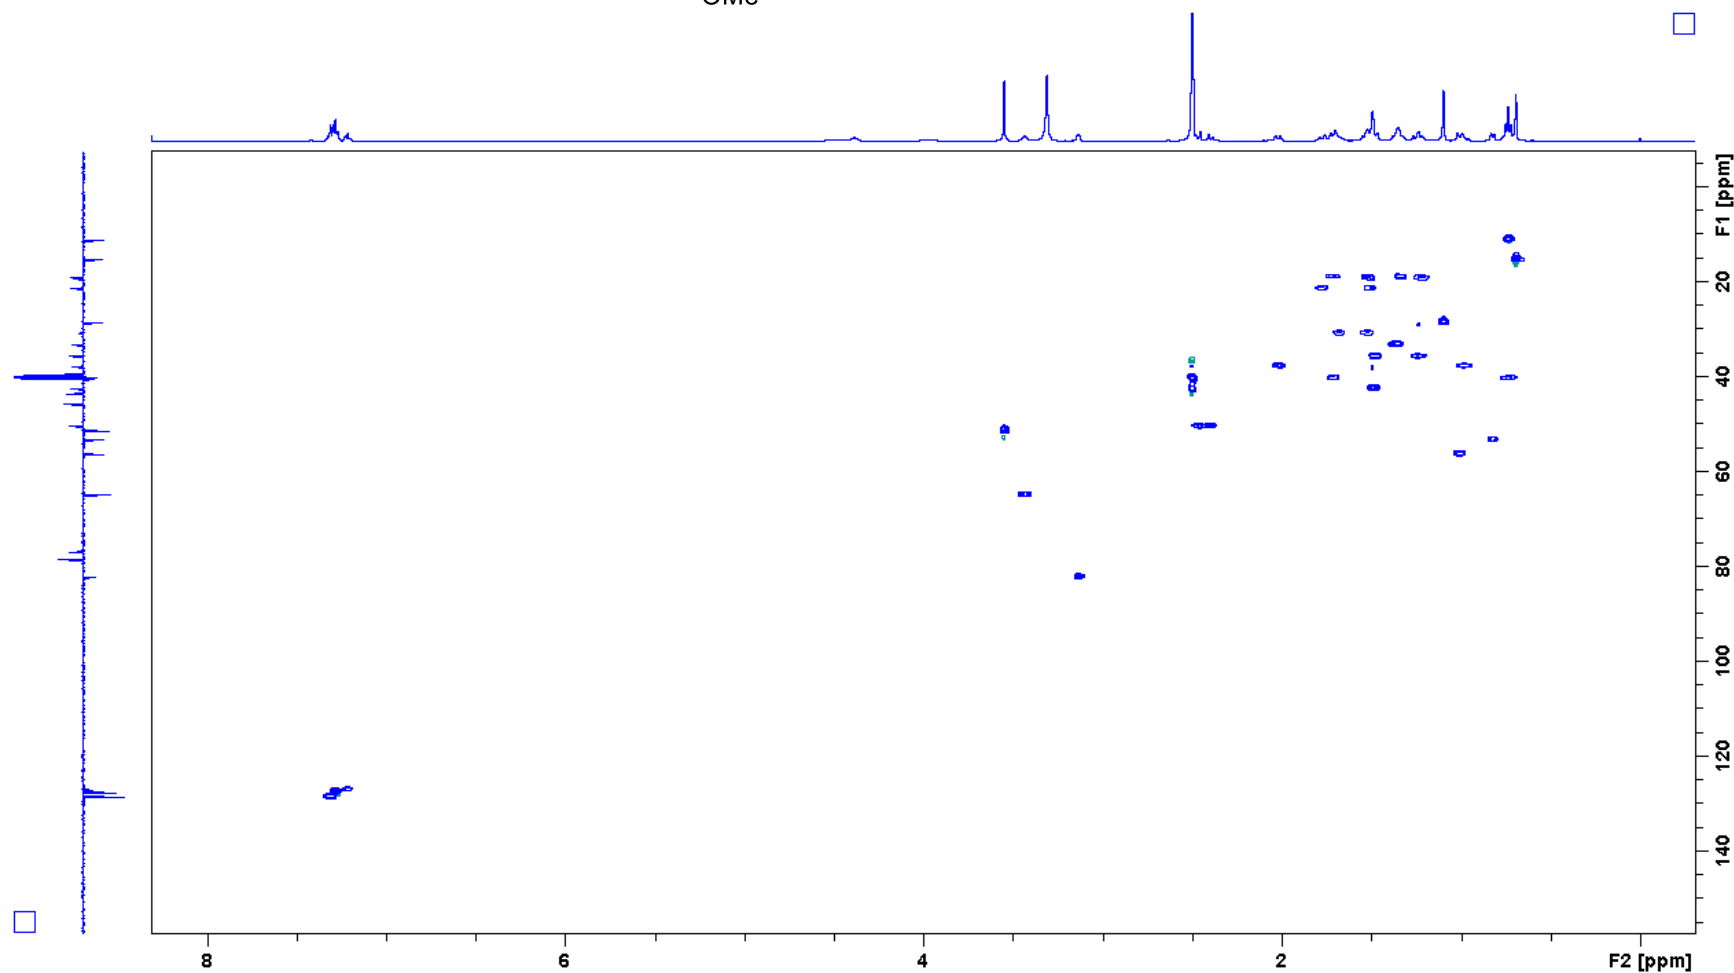



HMBC of compound (4*R*,6*aR*,7*R*,8*R*,9*S*,11*bS*)-methyl 7,8,9-trihydroxy-4,11*b*-dimethyl-8-(((*S*)-1-phenylpropyl)amino)methyl)tetradecahydro-6*a*,9-methanocyclohepta[*a*]naphthalene-4-carboxylate (**16**)

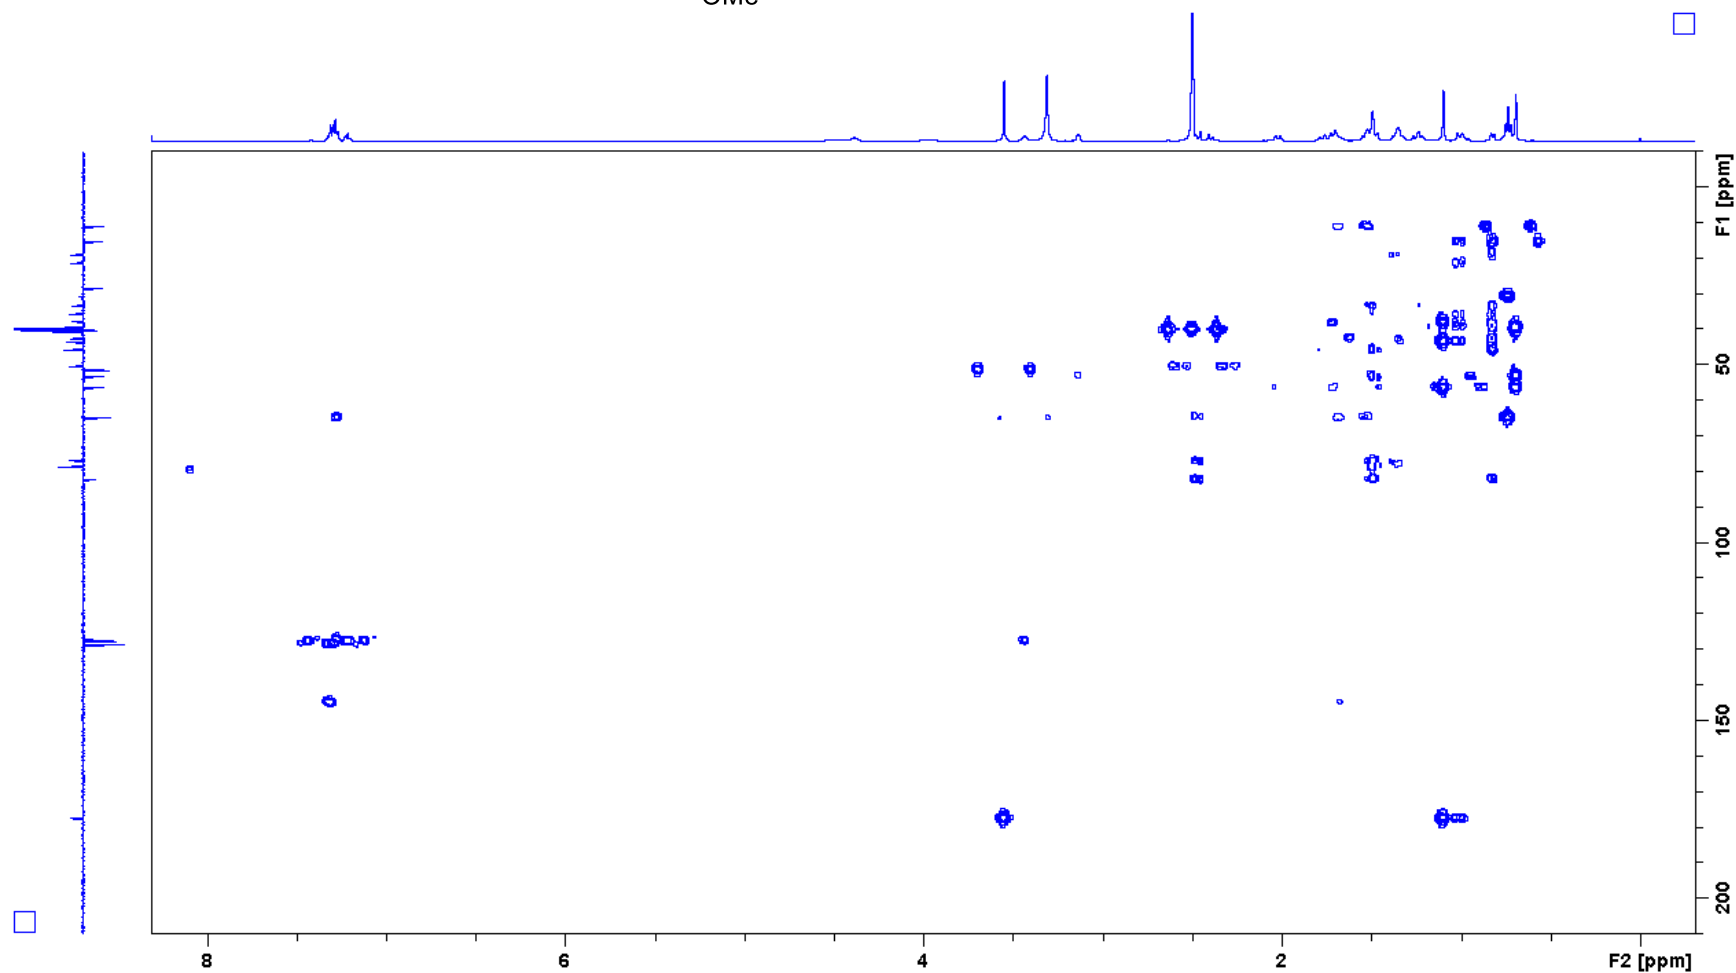

$^1\text{H}$ -NMR of compound (4*R*,6*aR*,7*R*,8*R*,9*S*,11*bS*)-methyl 8-(aminomethyl)-7,8,9-trihydroxy-4,11*b*-dimethyltetradecahydro-6*a*,9-methanocyclohepta[*a*]naphthalene-4-carboxylate (**17**)

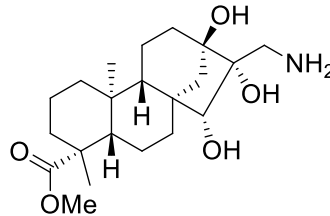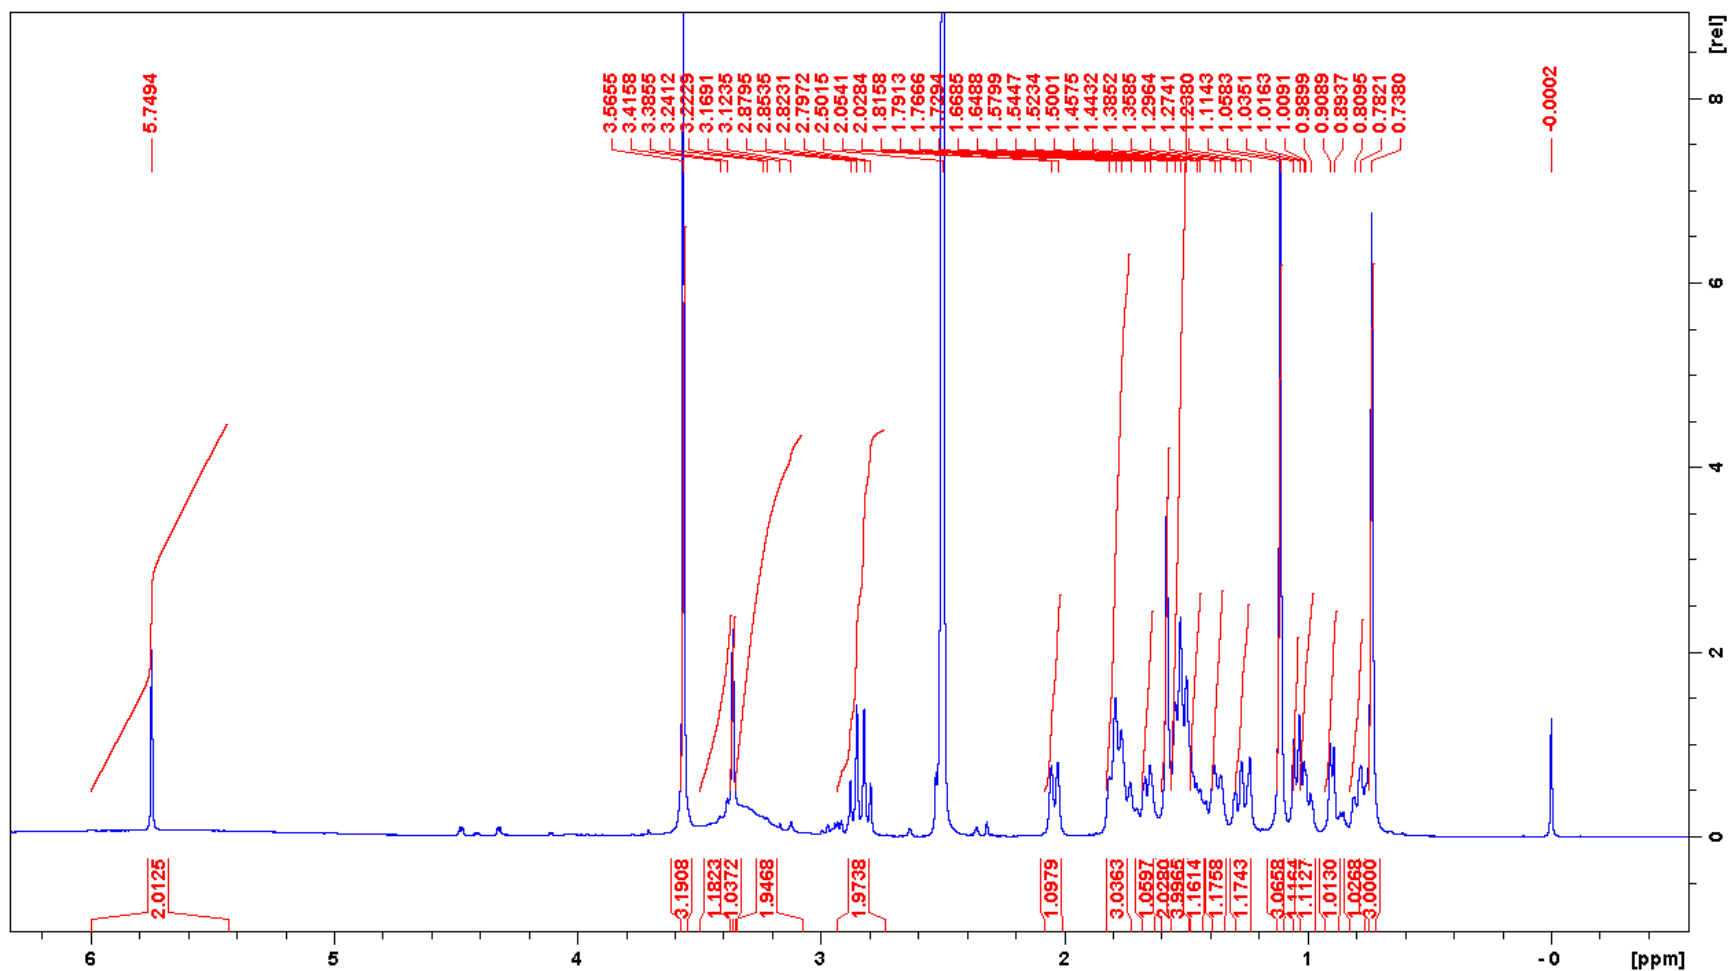

$^{13}\text{C}$ -NMR of compound (4*R*,6*aR*,7*R*,8*R*,9*S*,11*bS*)-methyl 8-(aminomethyl)-7,8,9-trihydroxy-4,11*b*-dimethyltetradecahydro-6*a*,9-methanocyclohepta[*a*]naphthalene-4-carboxylate (**17**)

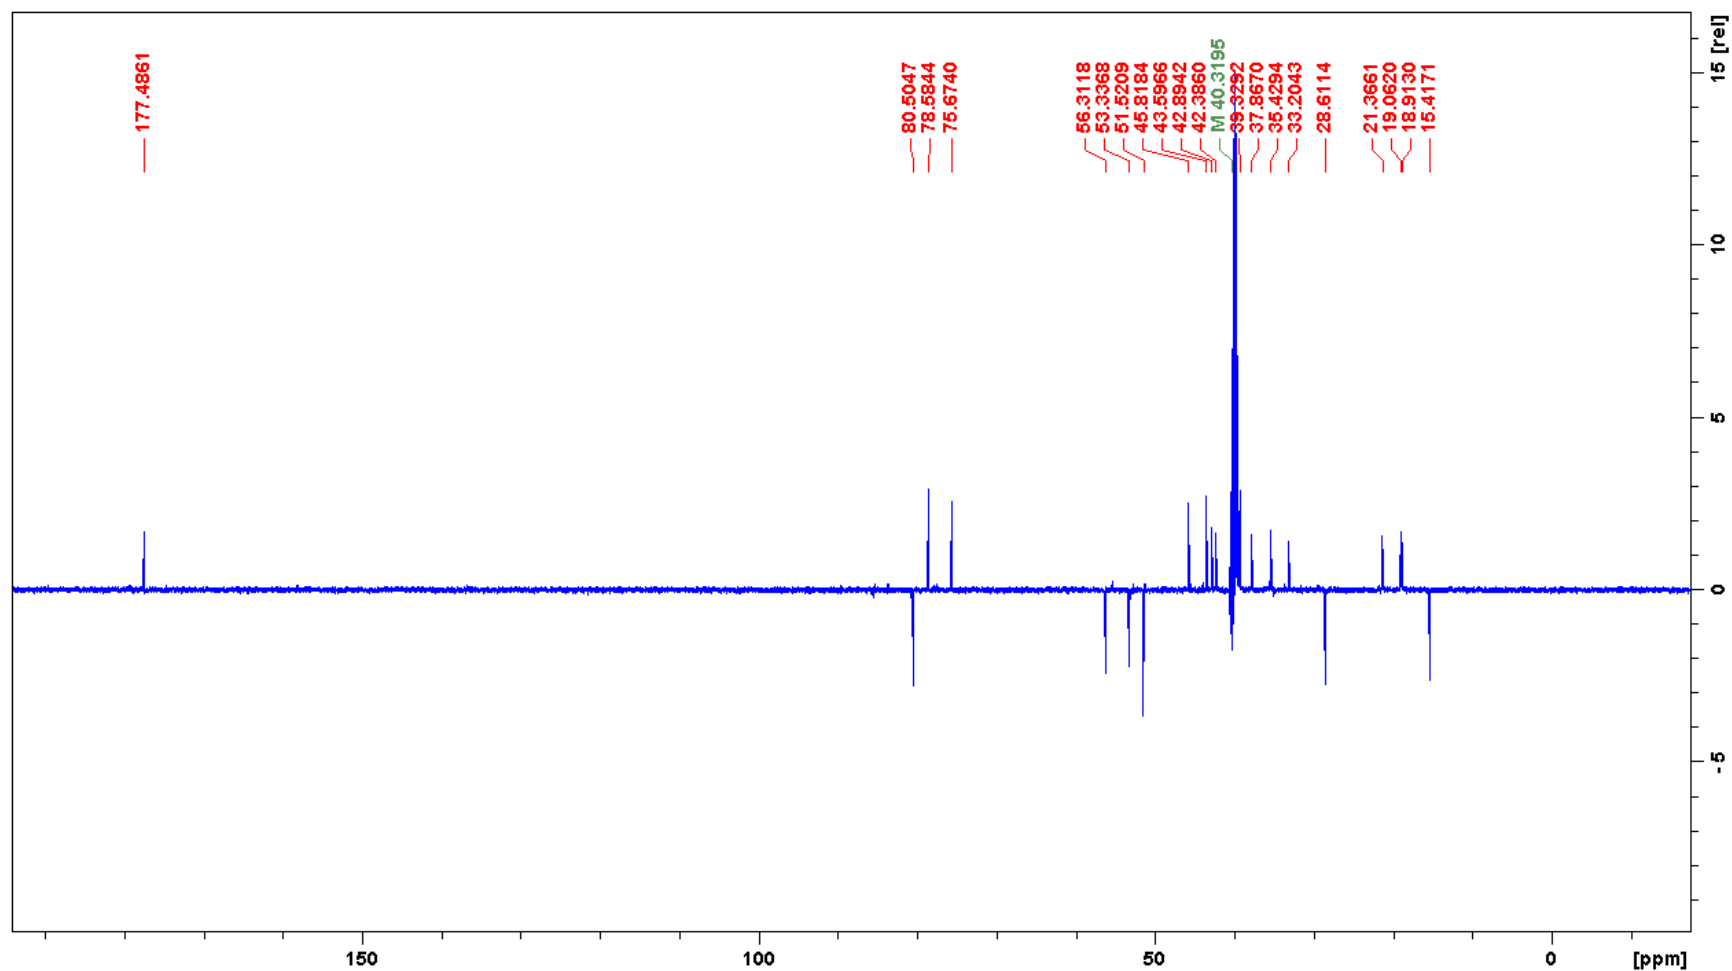

COSY of compound (4*R*,6*aR*,7*R*,8*R*,9*S*,11*bS*)-methyl 8-(aminomethyl)-7,8,9-trihydroxy-4,11*b*-dimethyltetradecahydro-6*a*,9-methanocyclohepta[*a*]naphthalene-4-carboxylate (**17**)

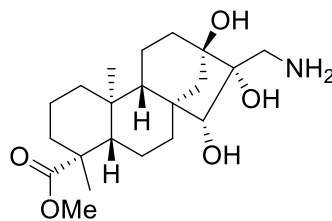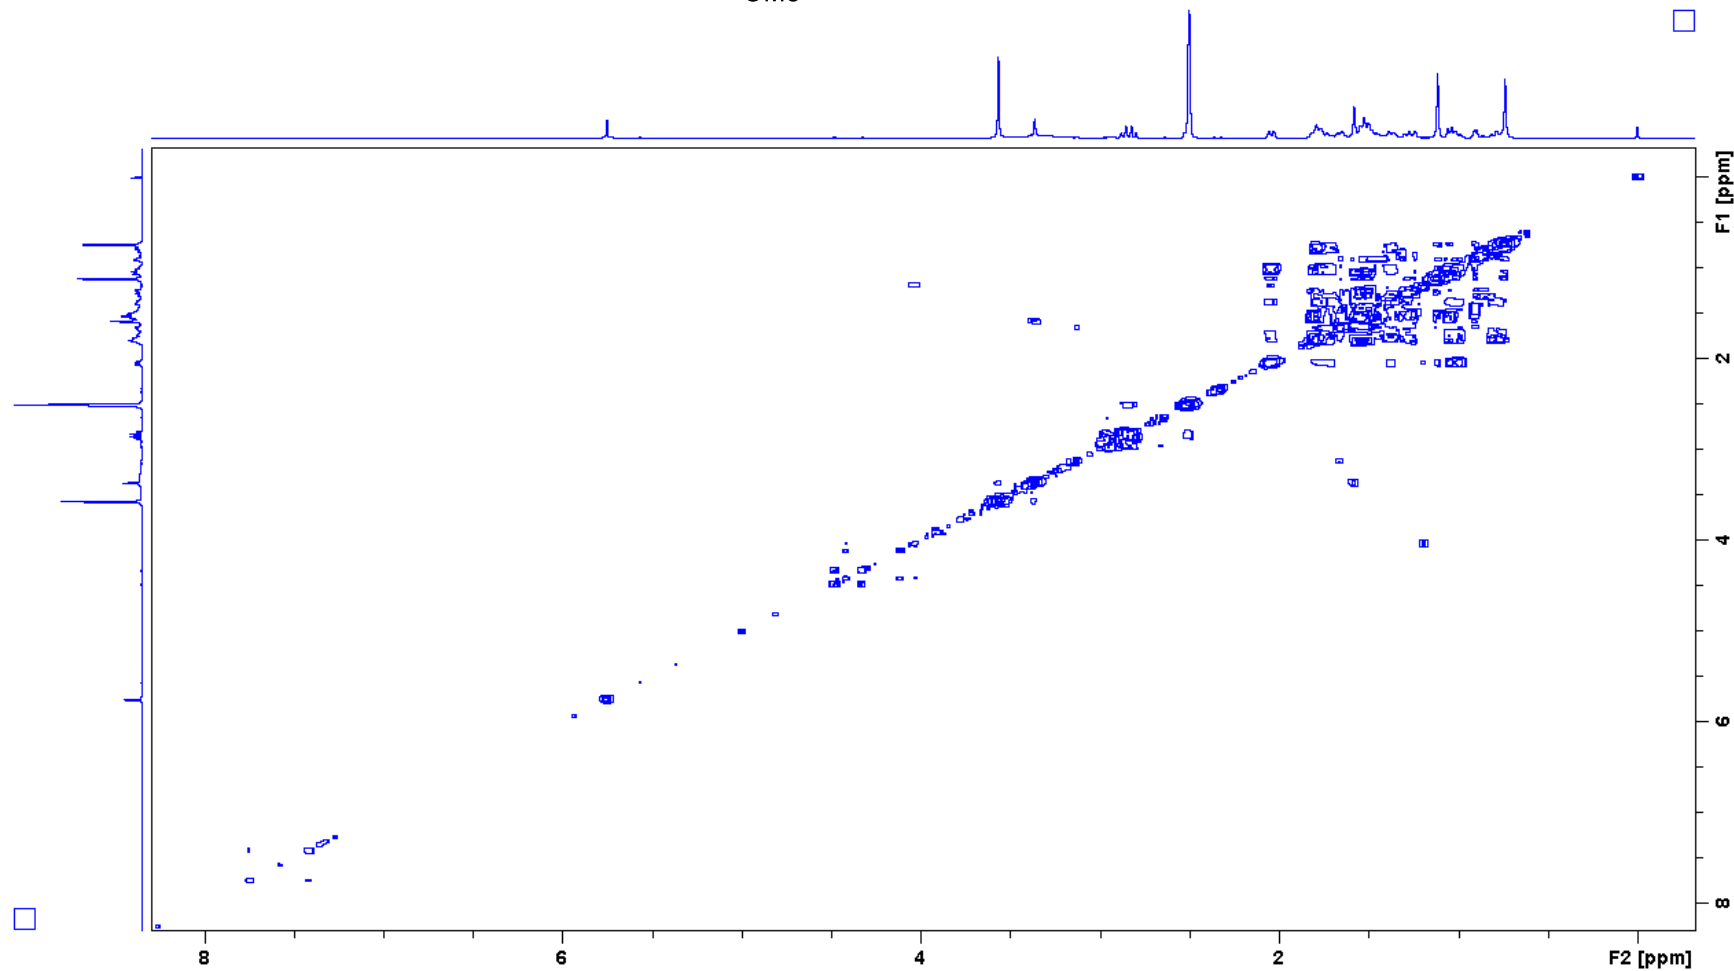

NOESY of compound (4*R*,6*aR*,7*R*,8*R*,9*S*,11*bS*)-methyl 8-(aminomethyl)-7,8,9-trihydroxy-4,11*b*-dimethyltetradecahydro-6*a*,9-methanocyclohepta[*a*]naphthalene-4-carboxylate (**17**)

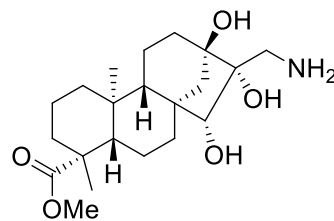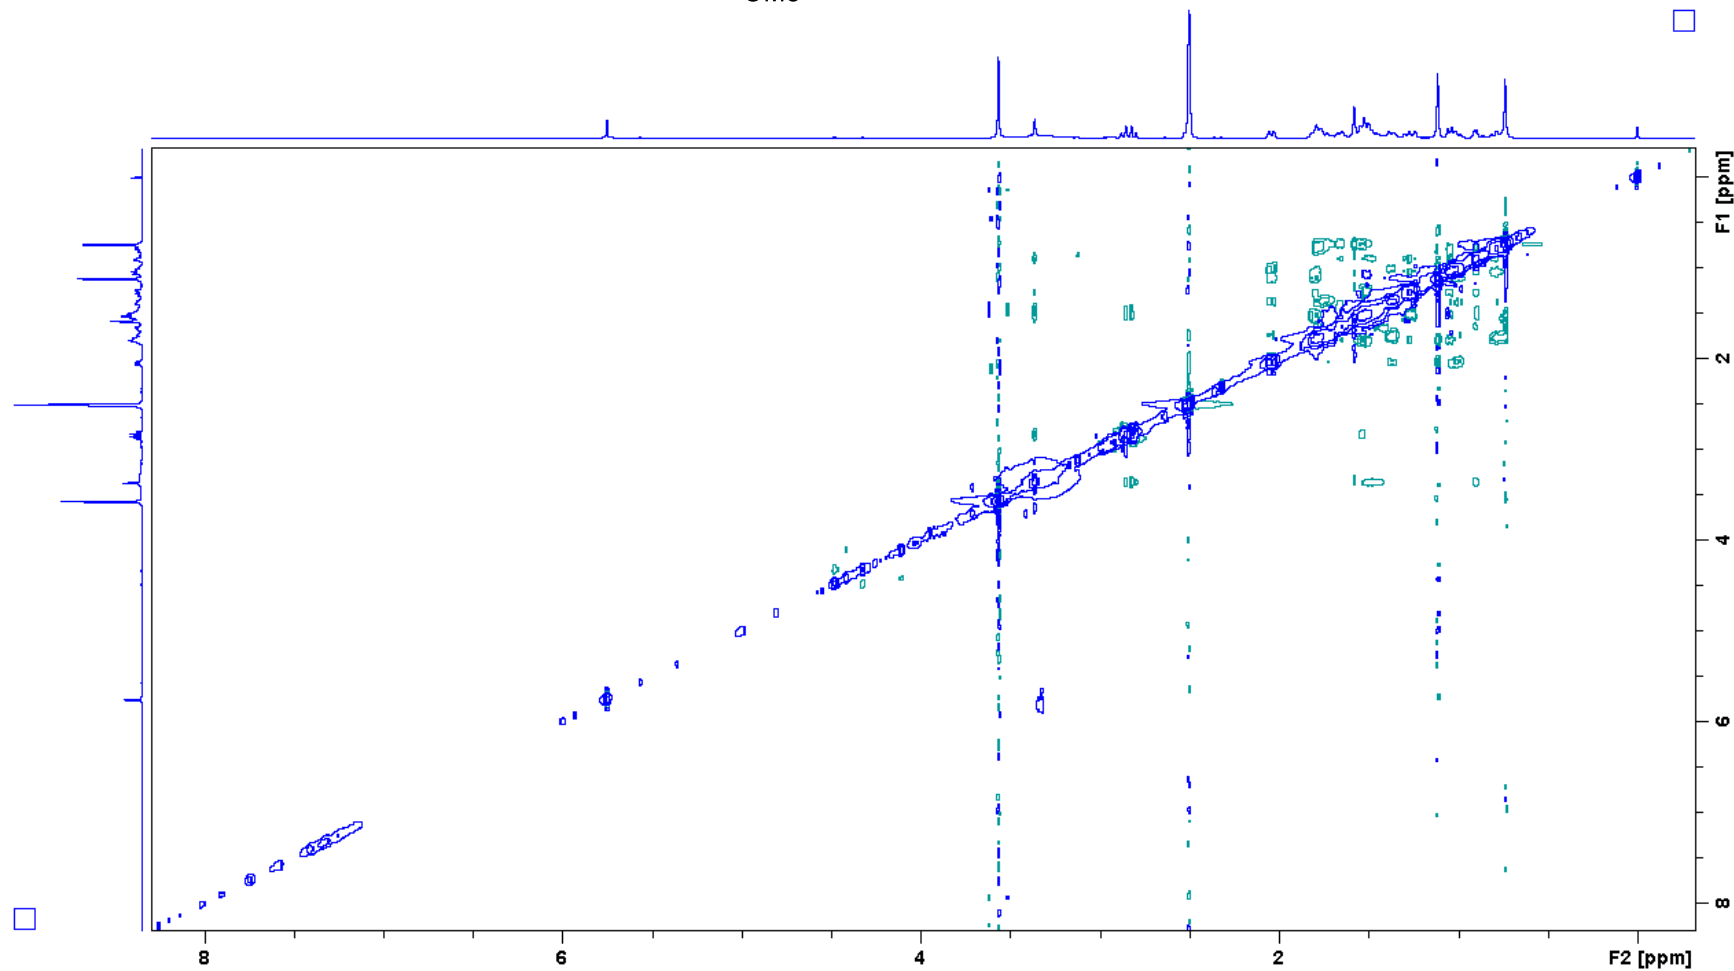

HSQC of compound (4*R*,6*aR*,7*R*,8*R*,9*S*,11*bS*)-methyl 8-(aminomethyl)-7,8,9-trihydroxy-4,11*b*-dimethyltetradecahydro-6*a*,9-methanocyclohepta[*a*]naphthalene-4-carboxylate (**17**)

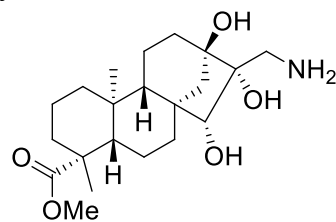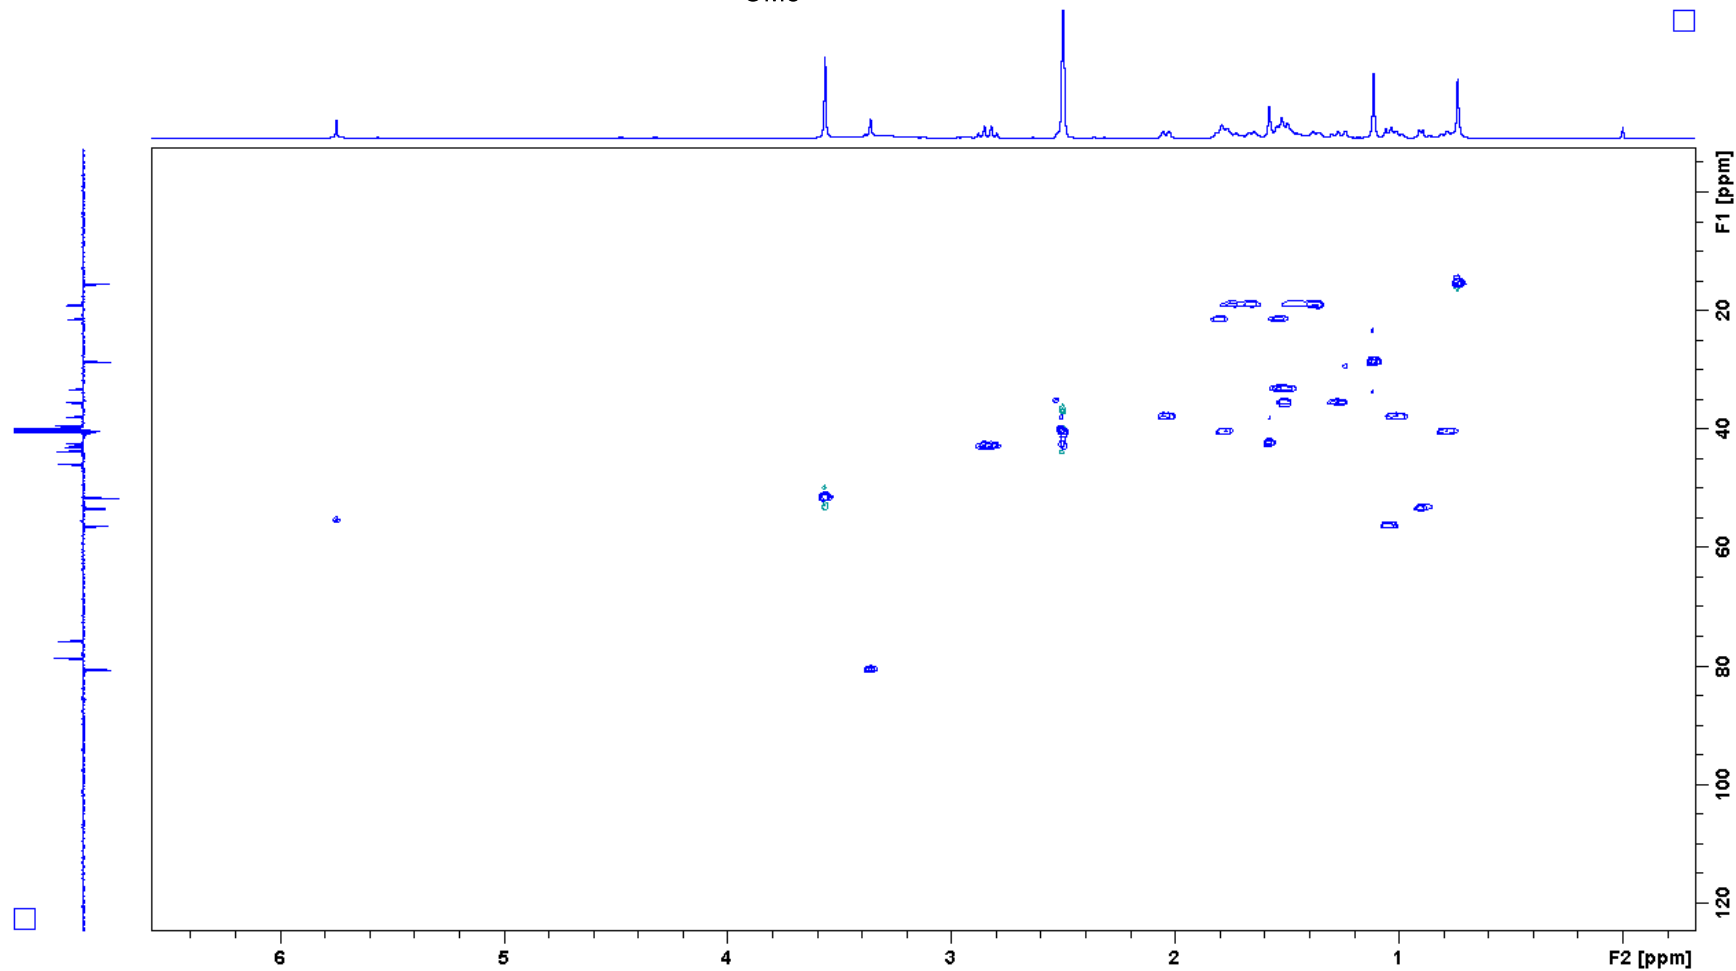

HMBC of compound (4*R*,6*aR*,7*R*,8*R*,9*S*,11*bS*)-methyl 8-(aminomethyl)-7,8,9-trihydroxy-4,11*b*-dimethyltetradecahydro-6*a*,9-methanocyclohepta[*a*]naphthalene-4-carboxylate (**17**)

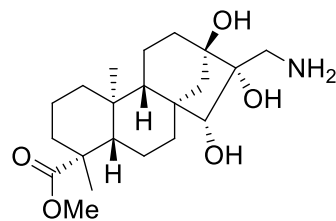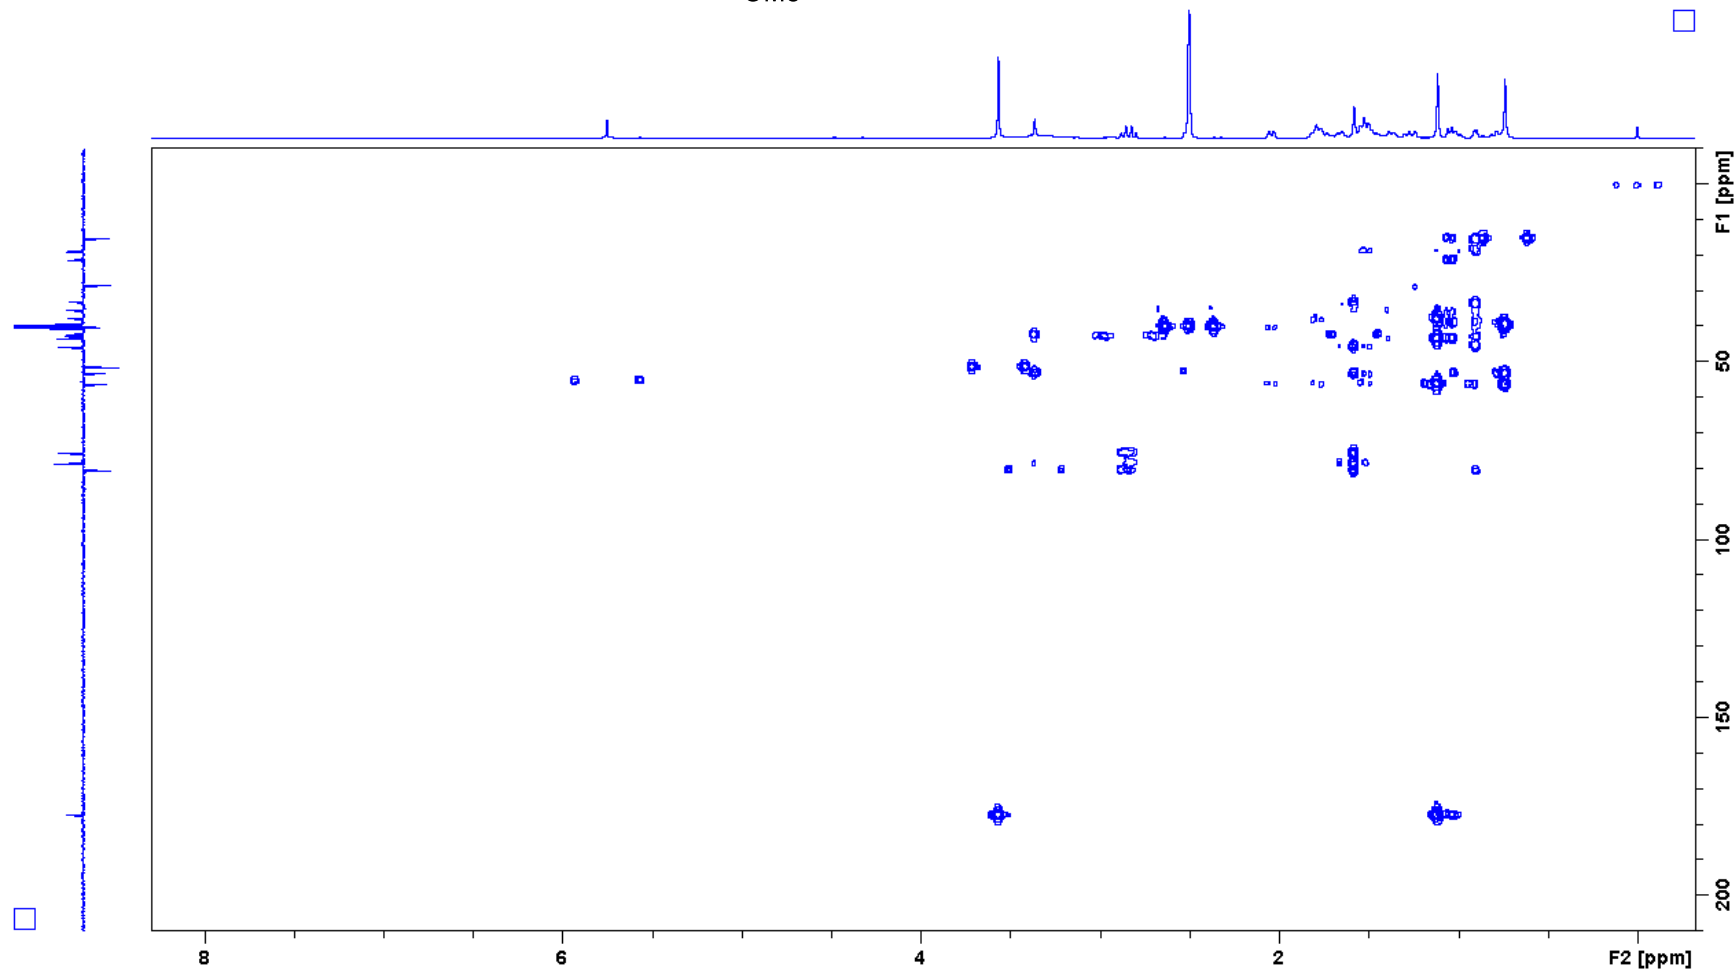

$^1\text{H}$ -NMR of compound (4*R*,5'*R*,6*aR*,7*R*,9*S*,11*bS*)-methyl 3'-benzyl-7,9-dihydroxy-4,11*b*-dimethyldodecahydro-1*H*-spiro[6*a*,9-methanocyclohepta[*a*]naphthalene-8,5'-oxazolidine]-4-carboxylate (**18**)

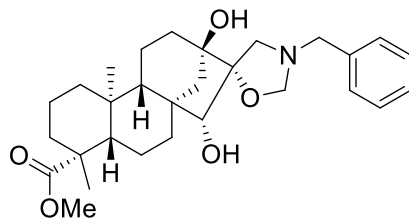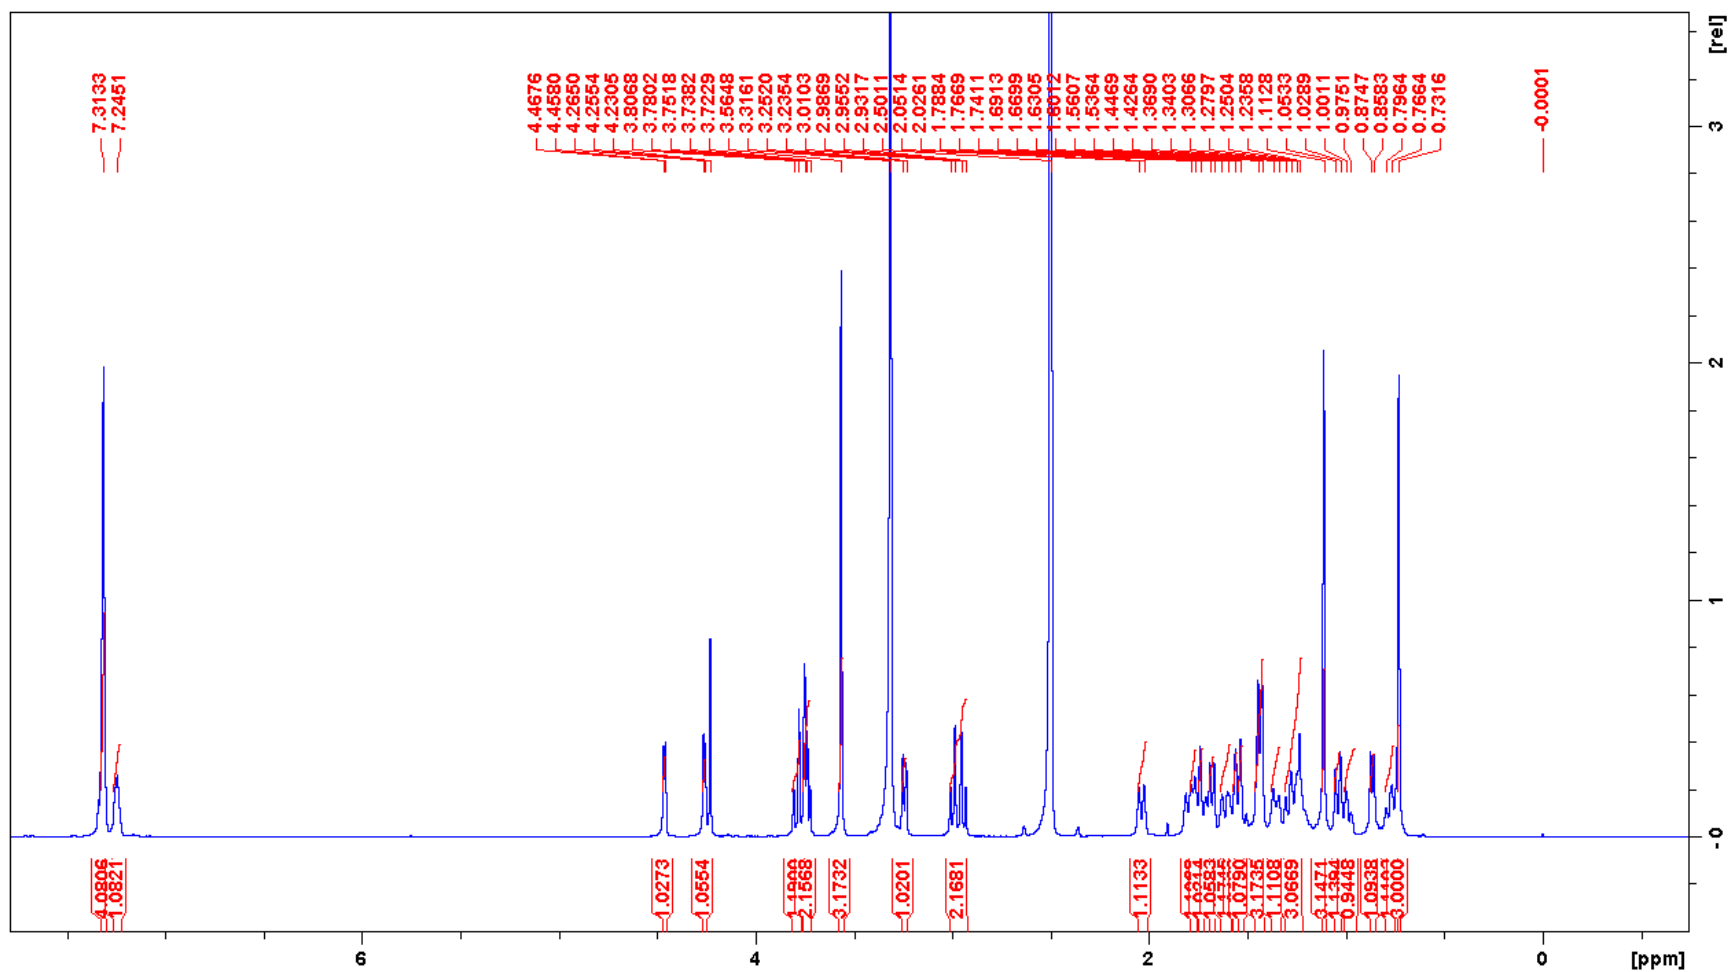



$^{13}\text{C}$ -NMR of compound (4*R*,5'*R*,6*aR*,7*R*,9*S*,11*bS*)-methyl 3'-benzyl-7,9-dihydroxy-4,11*b*-dimethyldodecahydro-1*H*-spiro[6*a*,9-methanocyclohepta[*a*]naphthalene-8,5'-oxazolidine]-4-carboxylate (**18**)

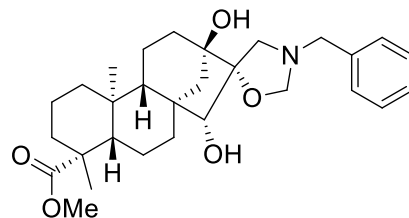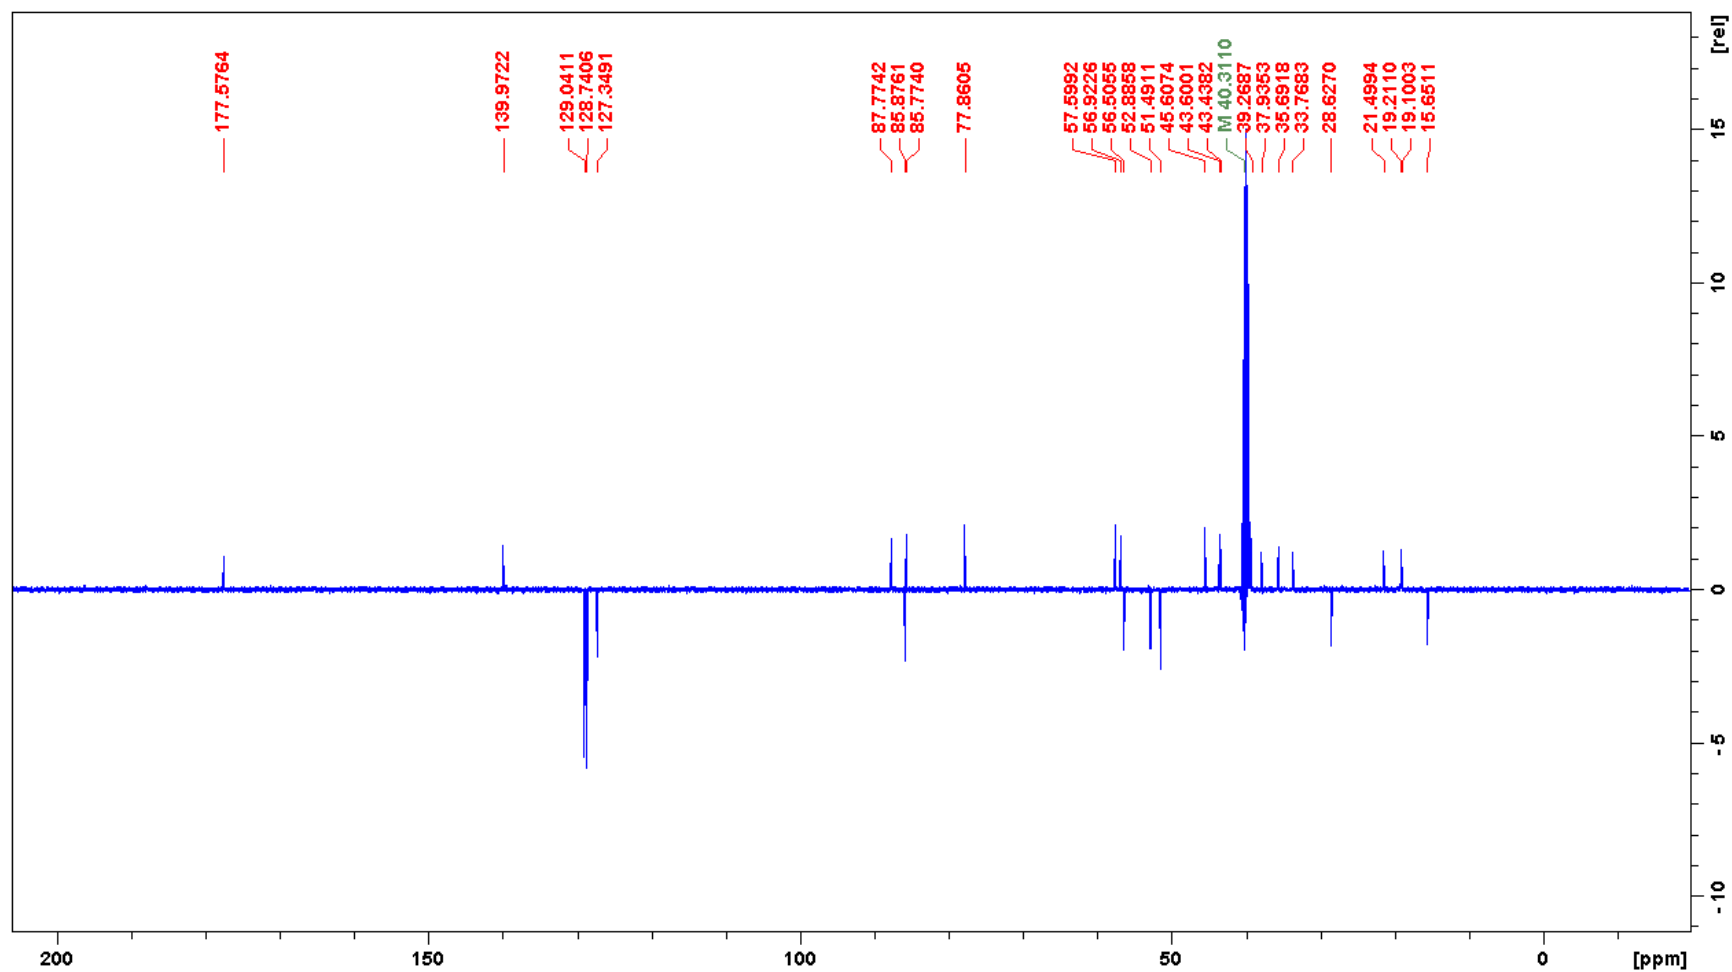

COSY of compound (4*R*,5'*R*,6*aR*,7*R*,9*S*,11*bS*)-methyl 3'-benzyl-7,9-dihydroxy-4,11*b*-dimethyldodecahydro-1*H*-spiro[6*a*,9-methanocyclohepta[*a*]naphthalene-8,5'-oxazolidine]-4-carboxylate (**18**)

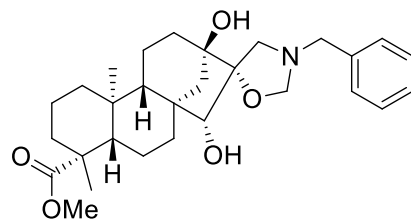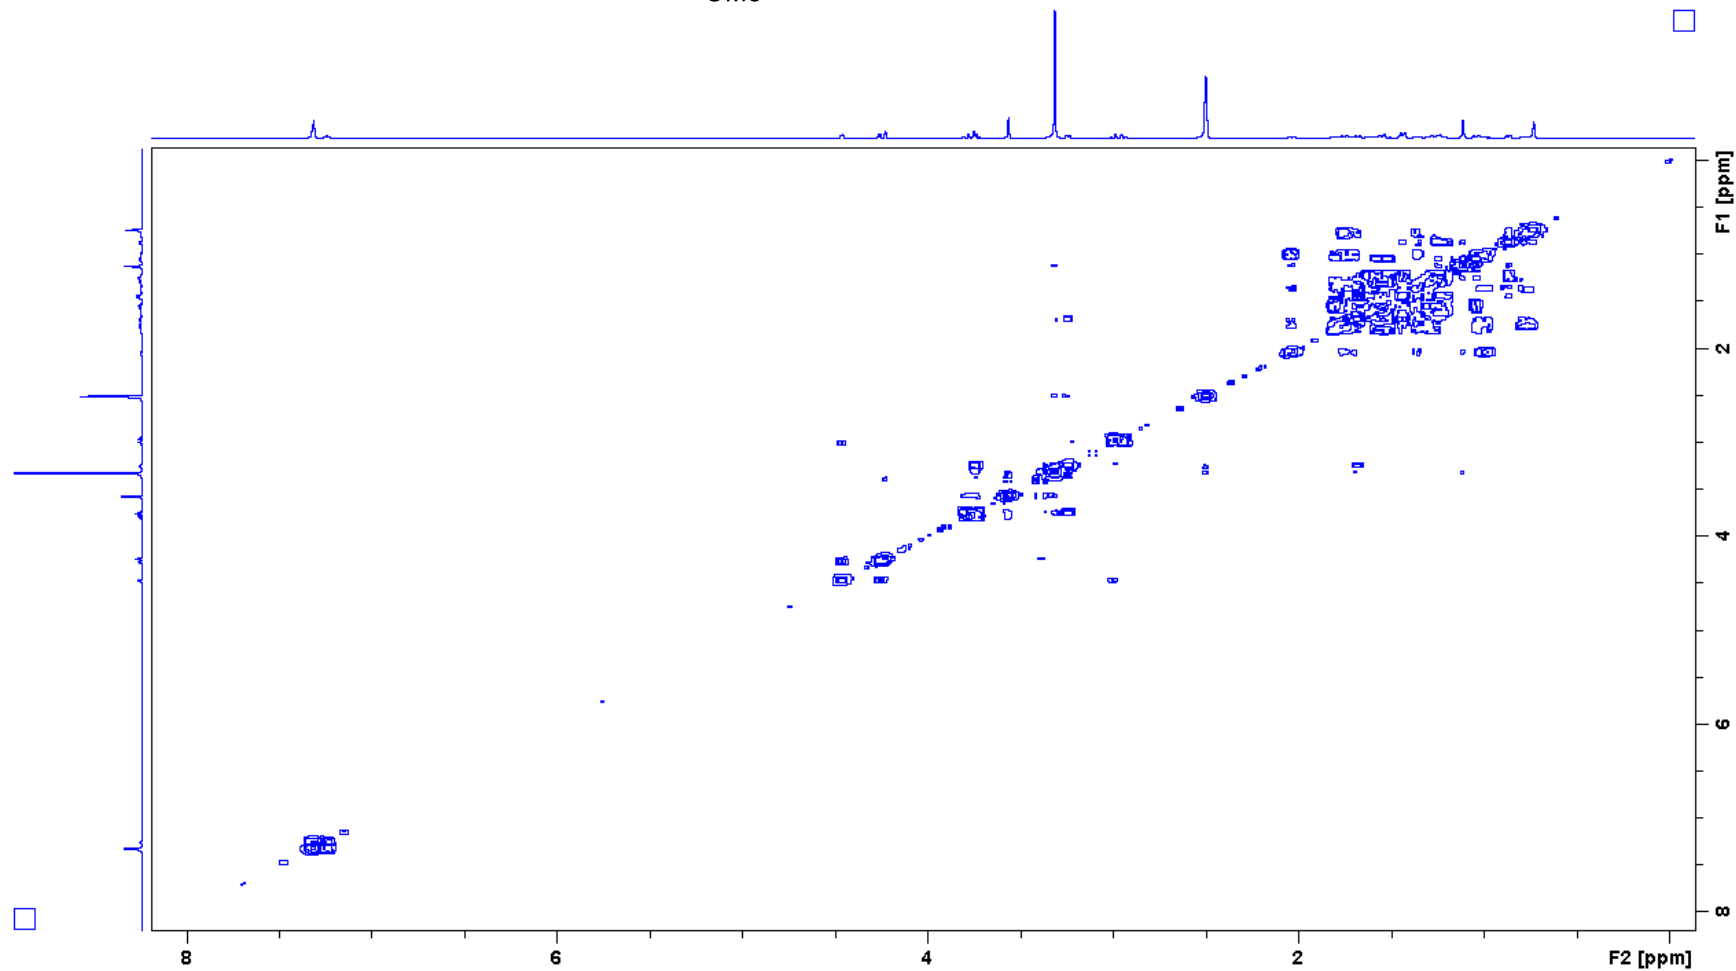

NOESY of compound (4*R*,5'*R*,6*aR*,7*R*,9*S*,11*bS*)-methyl 3'-benzyl-7,9-dihydroxy-4,11*b*-dimethyldodecahydro-1*H*-spiro[6*a*,9-methanocyclohepta[*a*]naphthalene-8,5'-oxazolidine]-4-carboxylate (**18**)

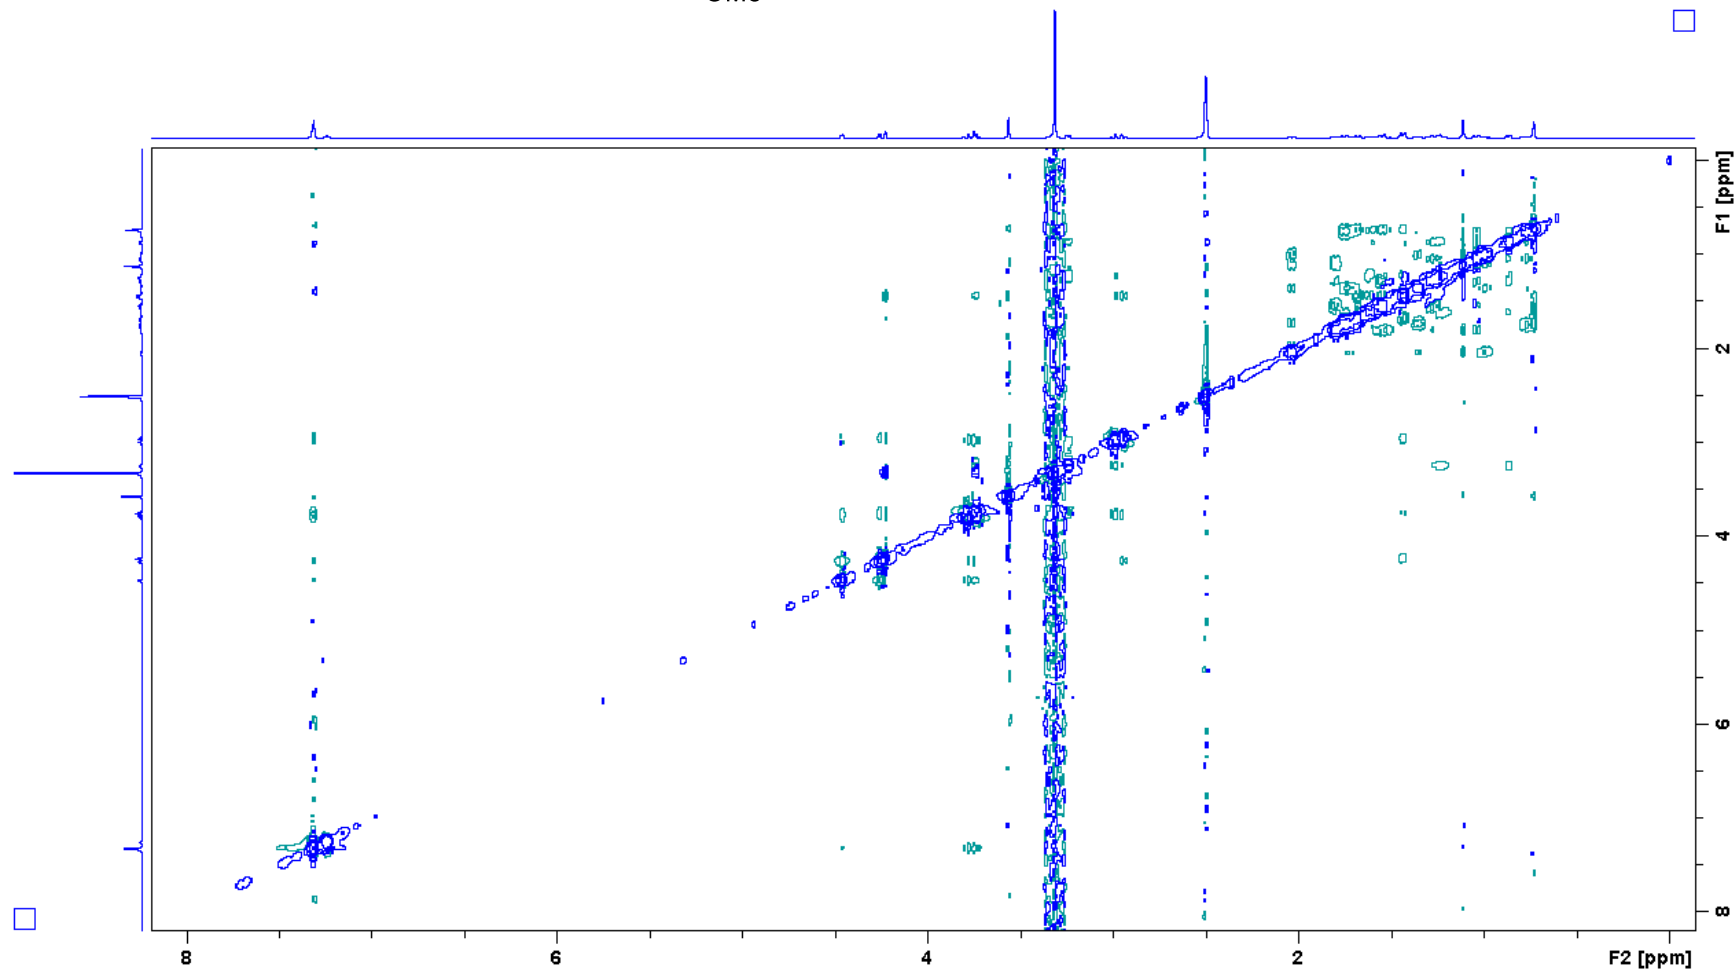

HSQC of compound (4*R*,5'*R*,6*aR*,7*R*,9*S*,11*bS*)-methyl 3'-benzyl-7,9-dihydroxy-4,11*b*-dimethyldodecahydro-1*H*-spiro[6*a*,9-methanocyclohepta[*a*]naphthalene-8,5'-oxazolidine]-4-carboxylate (**18**)

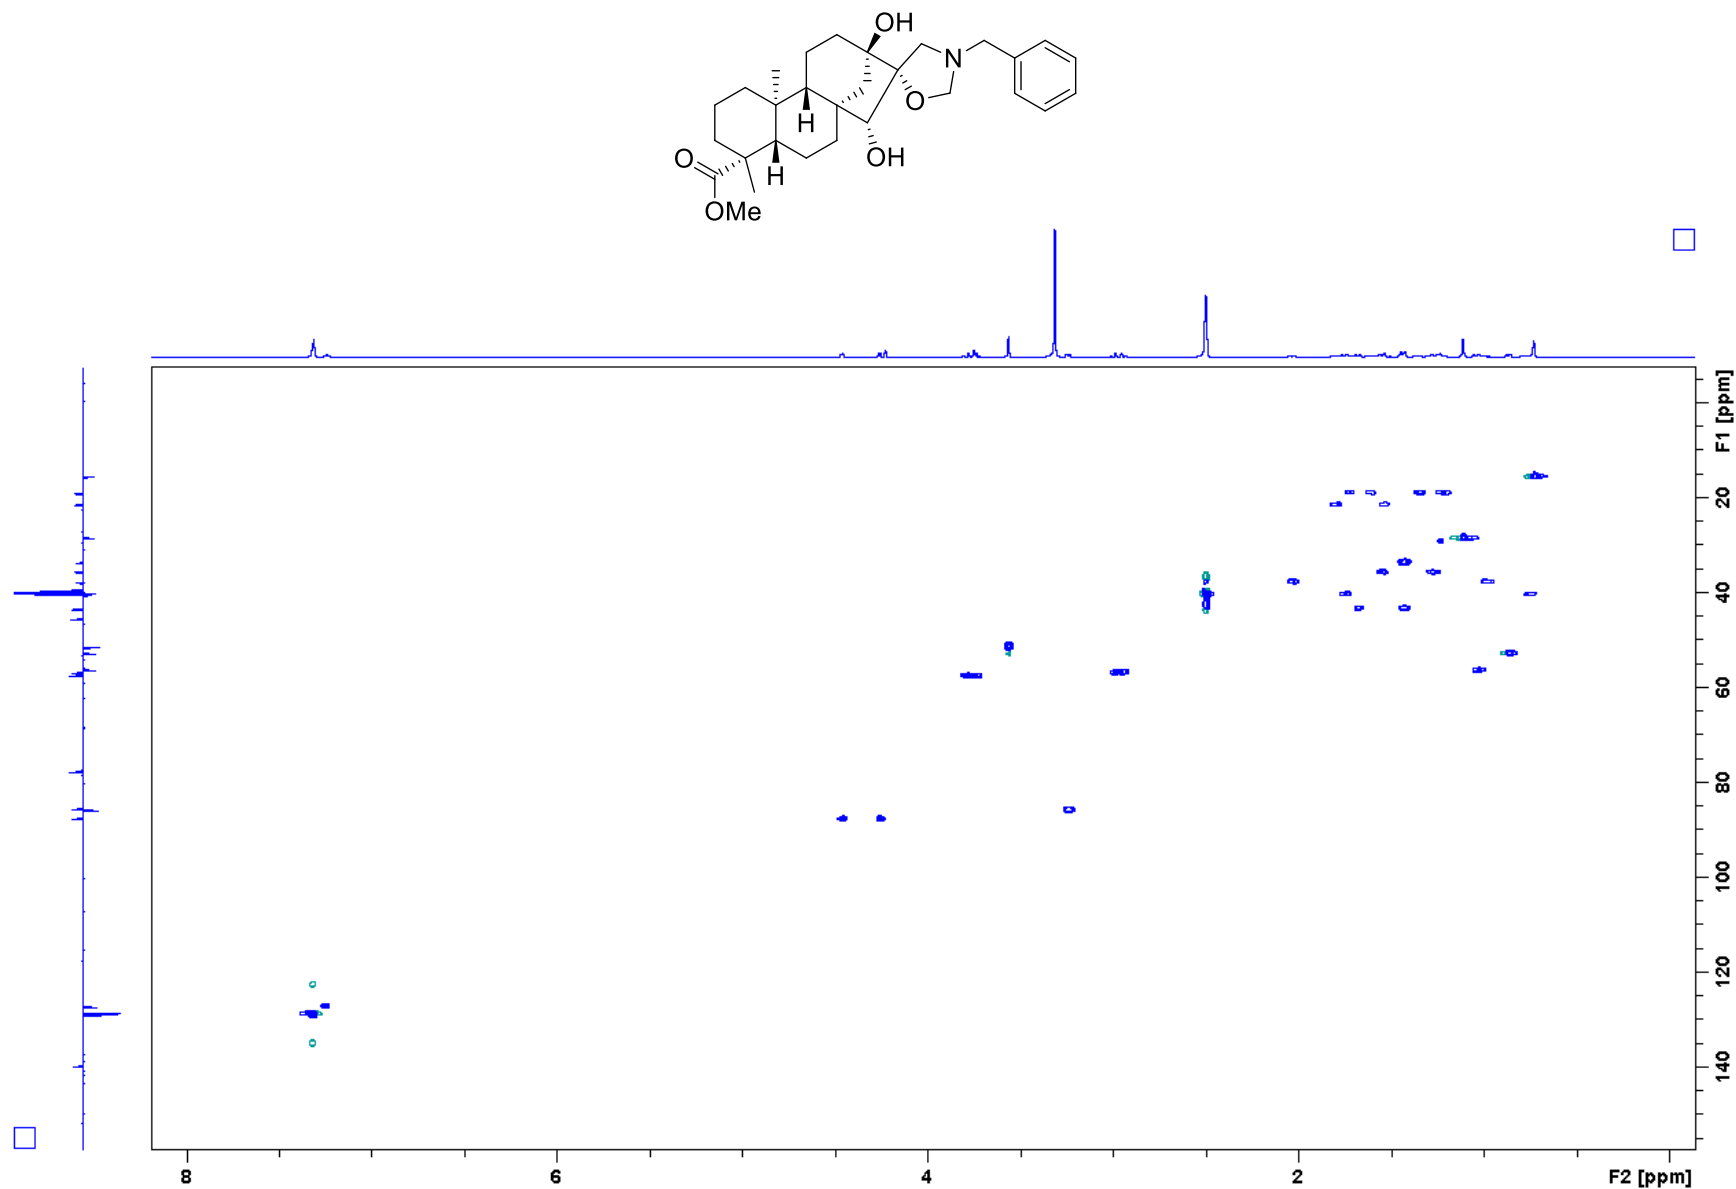

HMBC of compound (4*R*,5'*R*,6*aR*,7*R*,9*S*,11*bS*)-methyl 3'-benzyl-7,9-dihydroxy-4,11*b*-dimethyldodecahydro-1*H*-spiro[6*a*,9-methanocyclohepta[*a*]naphthalene-8,5'-oxazolidine]-4-carboxylate (**18**)

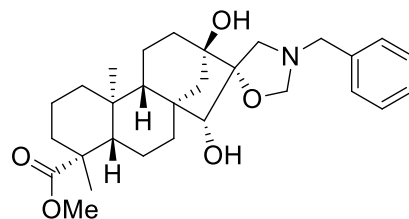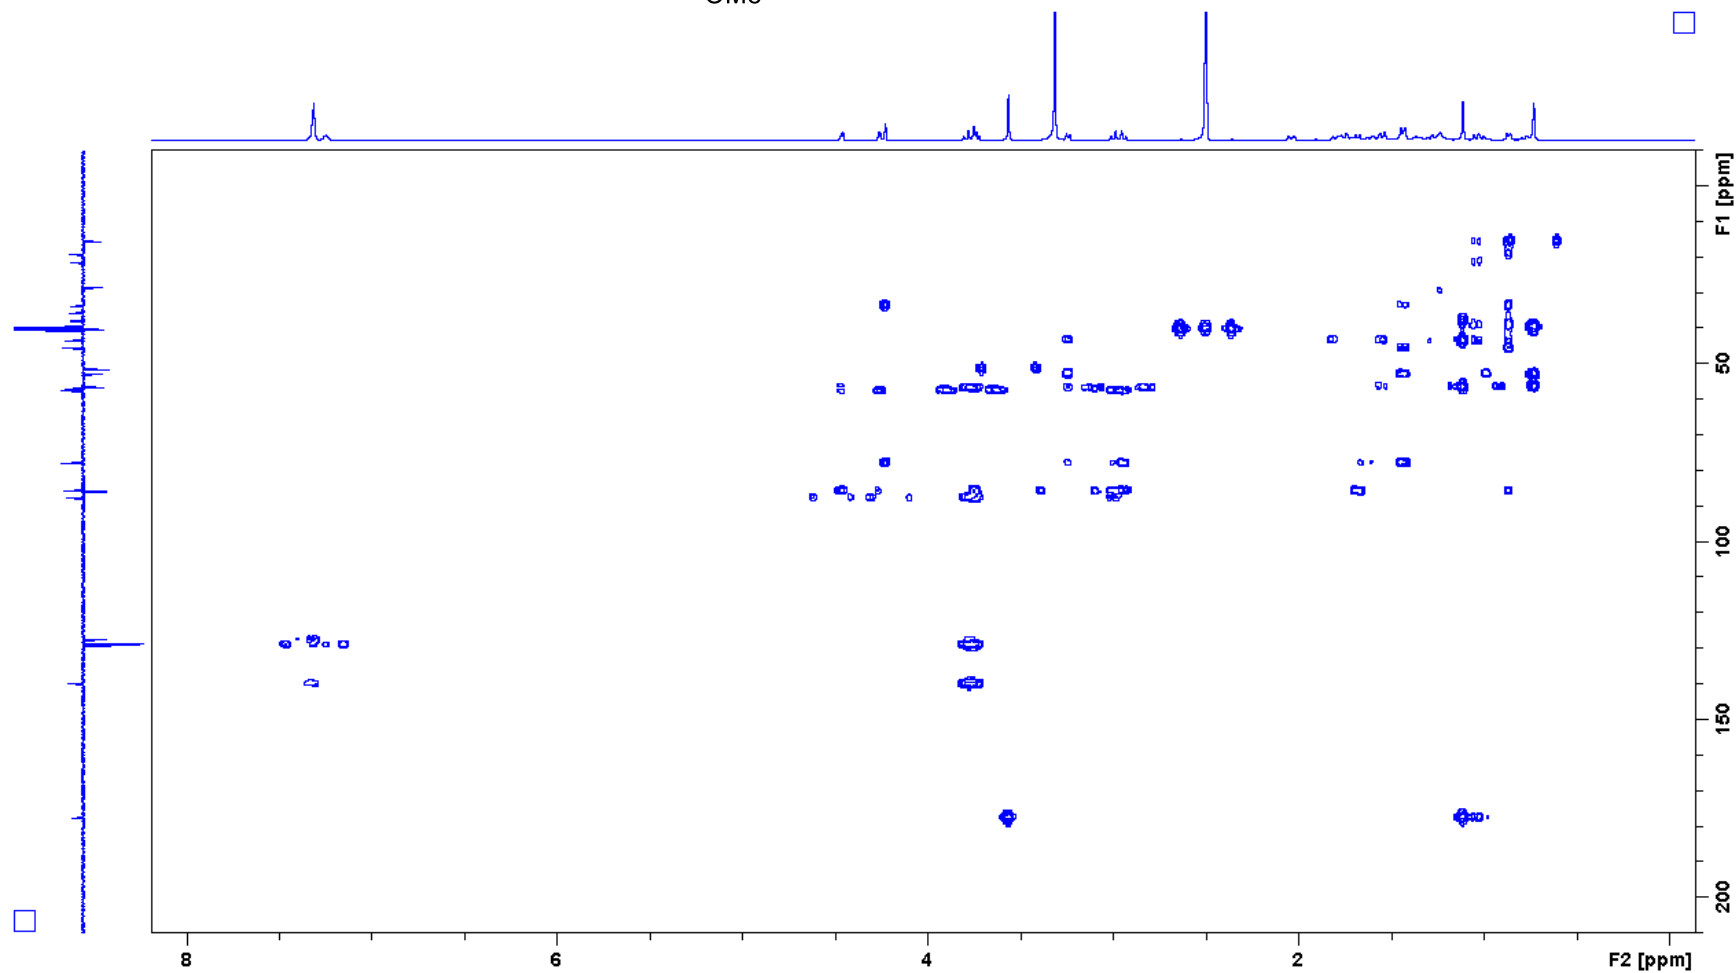

HRMS of compound (4*R*,6*aR*,7*R*,9*S*,11*bS*)-methyl 7,9-dihydroxy-4,11*b*-dimethyl-8-methylenetetradcahydro-6*a*,9-methanocyclohepta[*a*]naphthalene-4-carboxylate (**3**)

D:\DATA\...\SZS\SZS-20220520-POS AV: 1

SZS-20220520-POS #4744-4760 RT: 25.86-25.94 AV: 17 NL: 1.06E8 T:

FTMS + p ESI Full ms [125.0000-1000.0000]

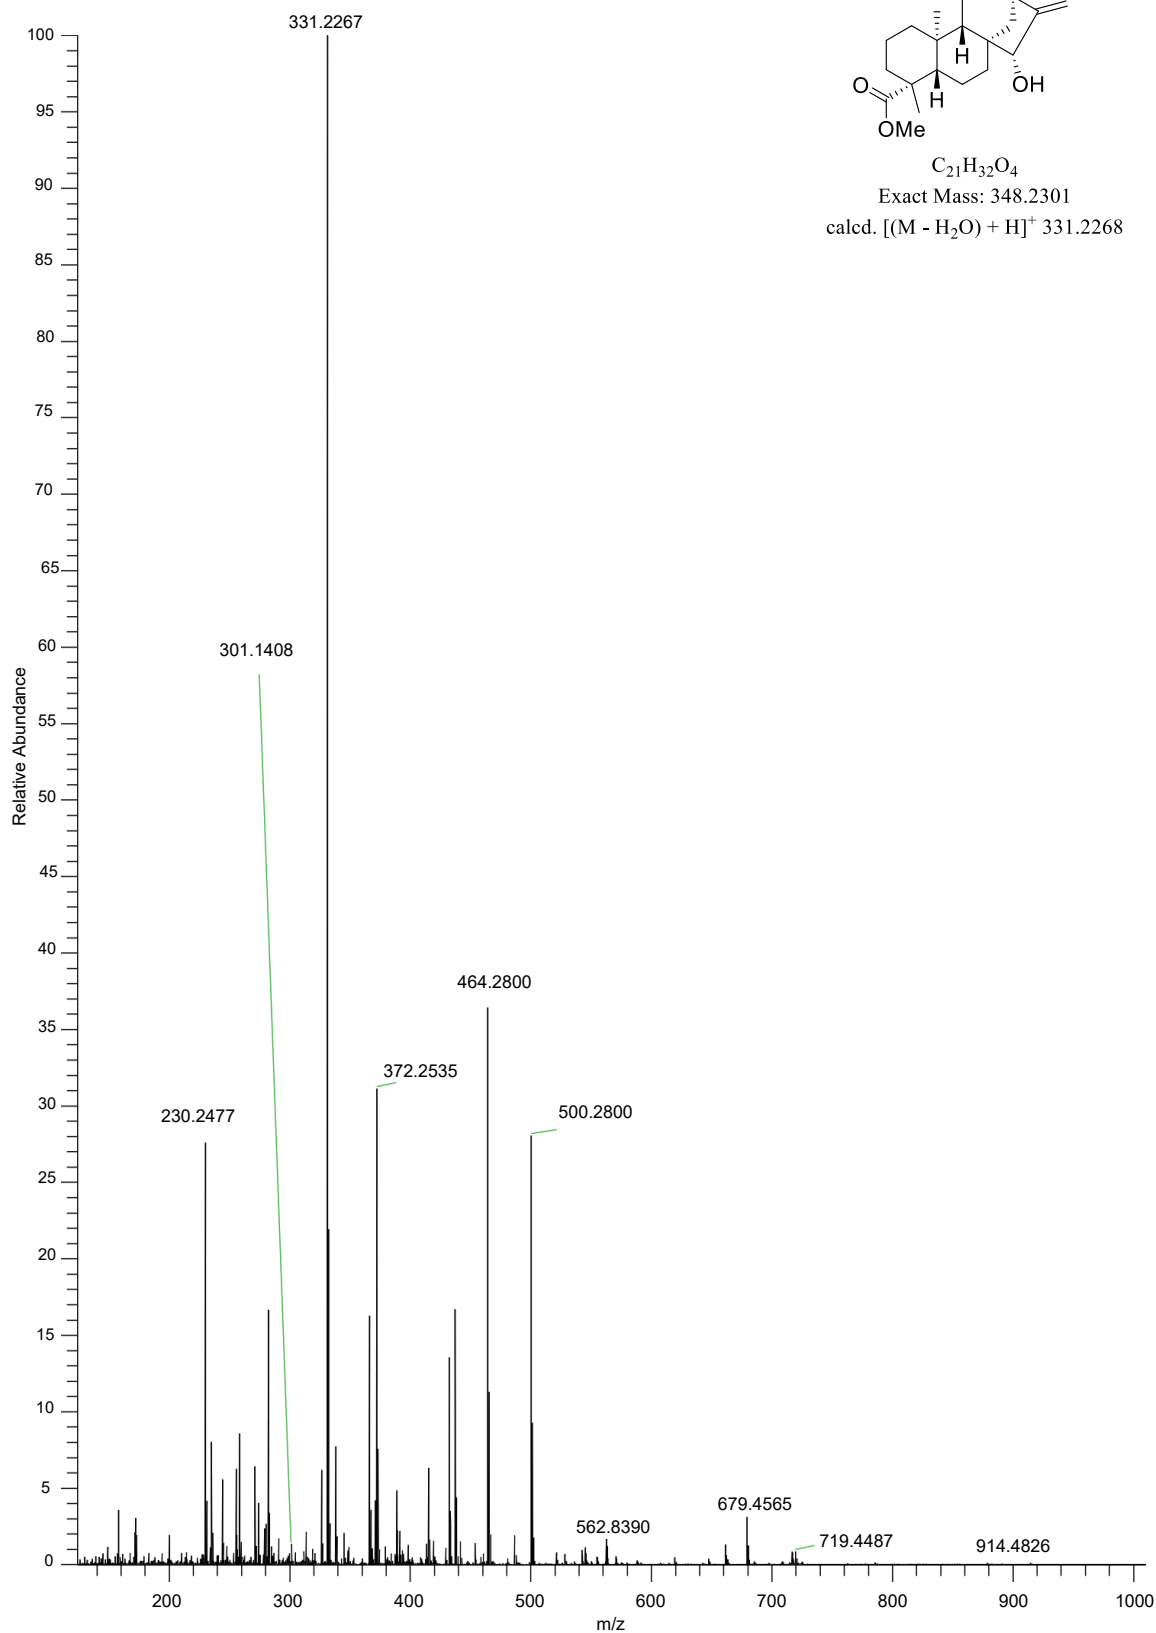

HRMS of compound (2'*R*,4*R*,6*aR*,7*R*,9*S*,11*bS*)-methyl 7,9-dihydroxy-4,11*b*-dimethyldodecahydro-1*H*-spiro[6*a*,9-methanocyclohepta[*a*]naphthalene-8,2'-oxirane]-4-carboxylate (**4b**)

D:\DATA\...SZZS\SZZS-20220520-POS

SZZS-20220520-POS #5039-5055 RT: 27.49-27.57 AV: 17 NL: 1.39E8 T:

FTMS + p ESI Full ms [125.0000-1000.0000]

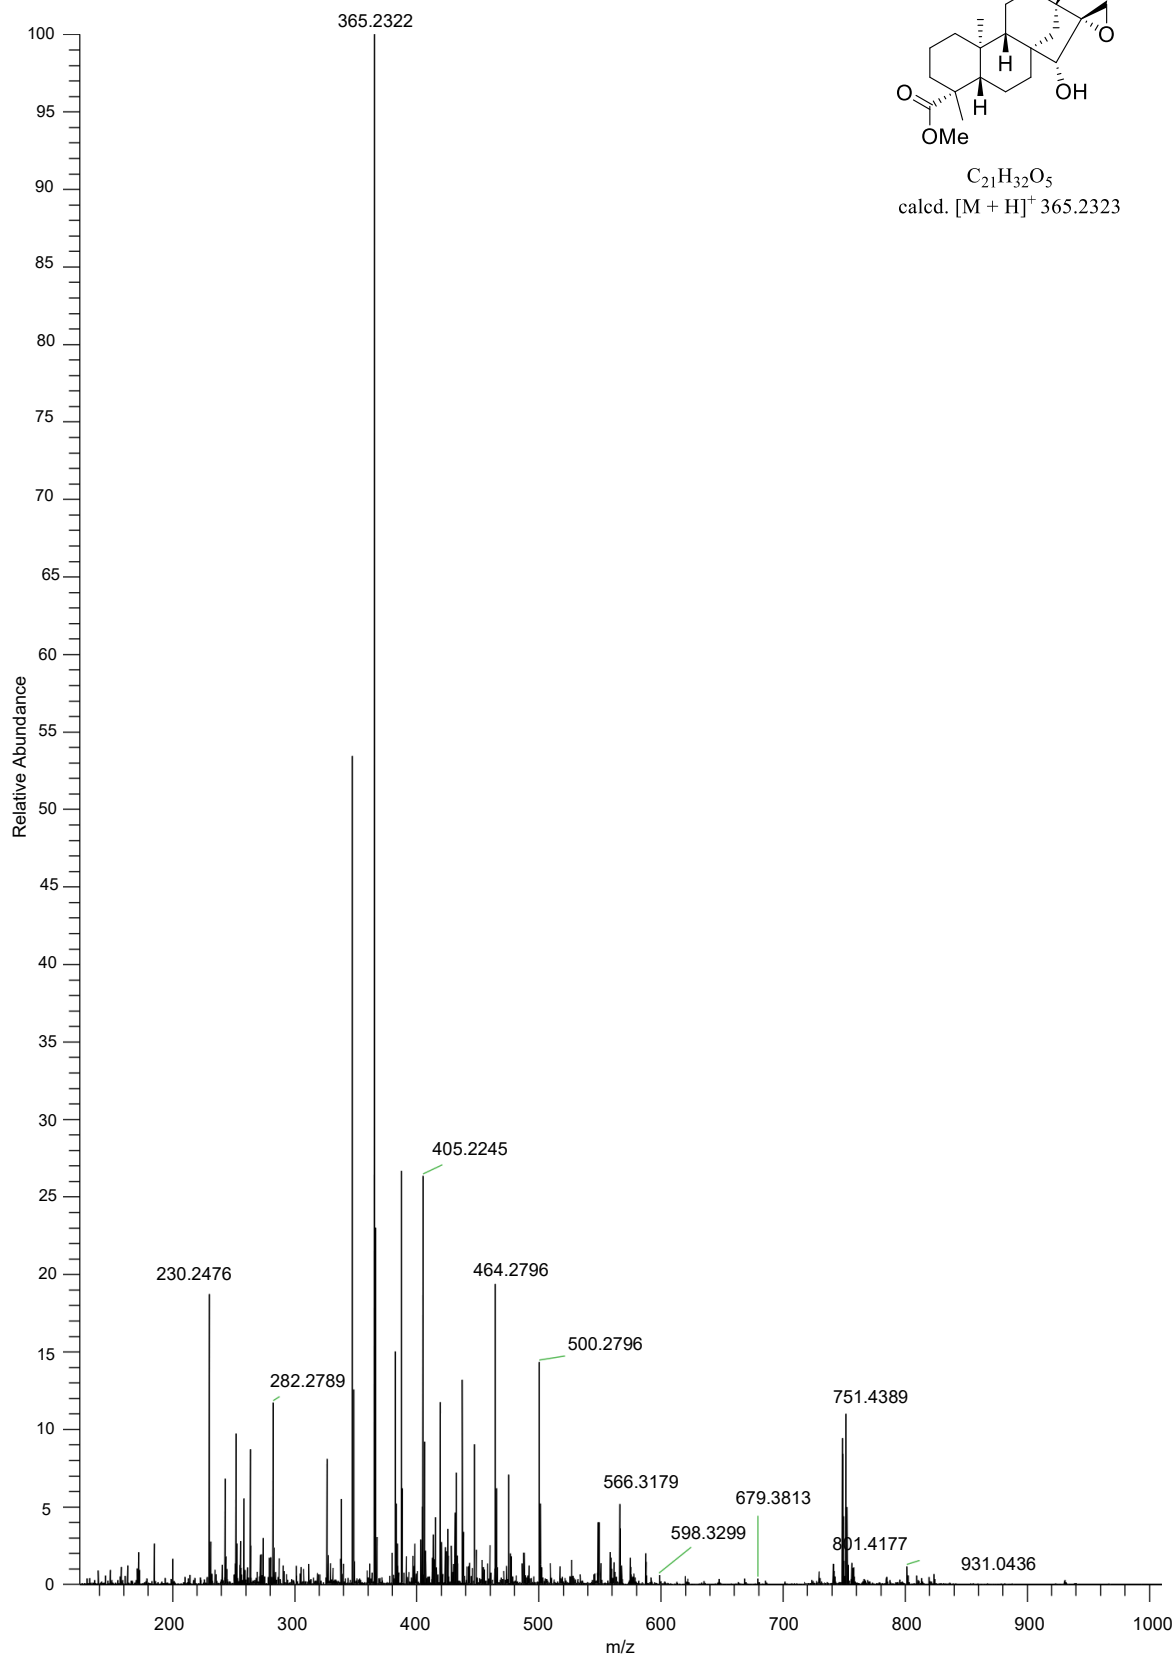

HRMS of compound (4*R*,6*aR*,7*R*,8*R*,9*S*,11*bS*)-methyl 8-((benzylamino)methyl)-7,8,9-trihydroxy-4,11*b*-dimethyltetradecahydro-6*a*,9-methanocyclohepta[*a*]naphthalene-4-carboxylate (**5**)

D:\DATA\...\20210705\SZZS20210705

07/05/21 07:35:29

SZZS20210705 #15166-15334 RT: 48.66-49.19 AV: 84 NL: 2.01E9  
T: FTMS + p ESI Full ms [100.0000-1000.0000]

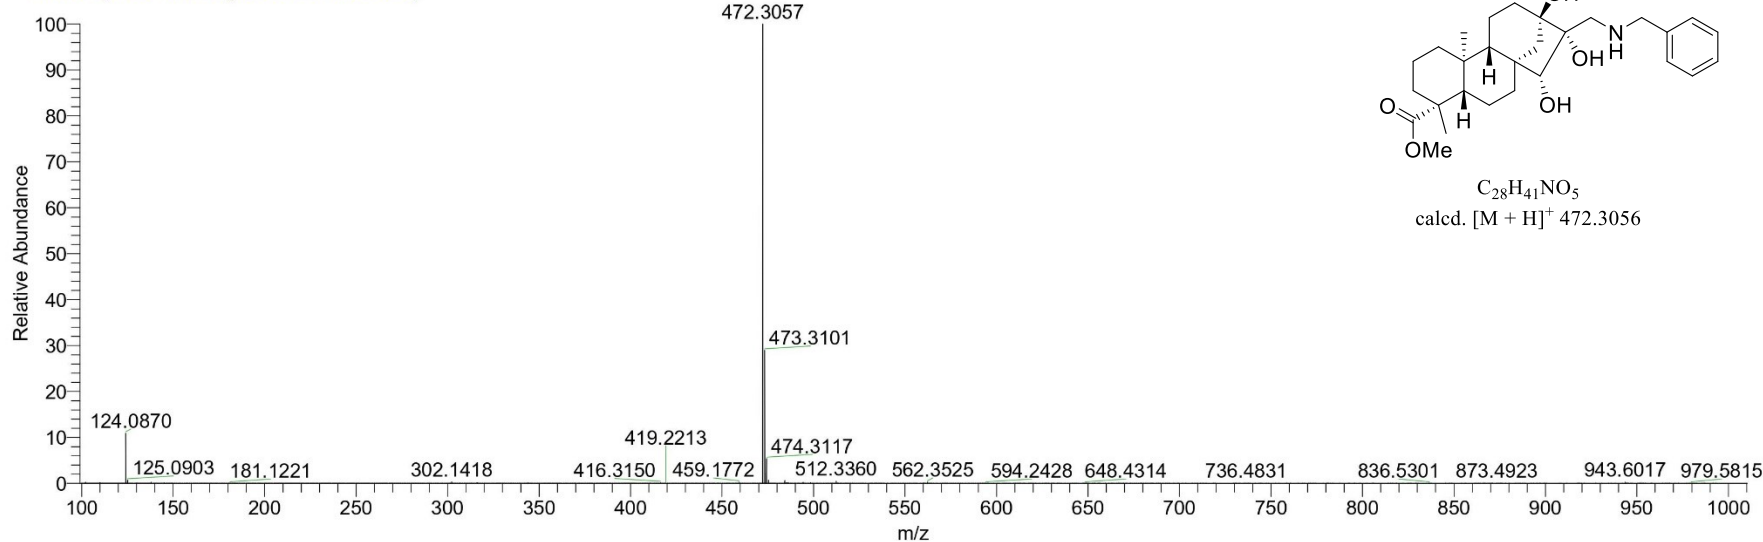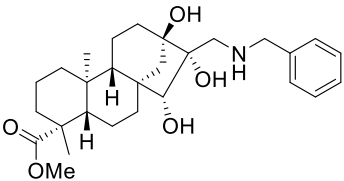

C<sub>28</sub>H<sub>41</sub>NO<sub>5</sub>  
calcd. [M + H]<sup>+</sup> 472.3056

SZZS20210705 #15166-15334 RT: 48.66-49.19 AV: 84 NL: 2.01E9  
T: FTMS + p ESI Full ms [100.0000-1000.0000]

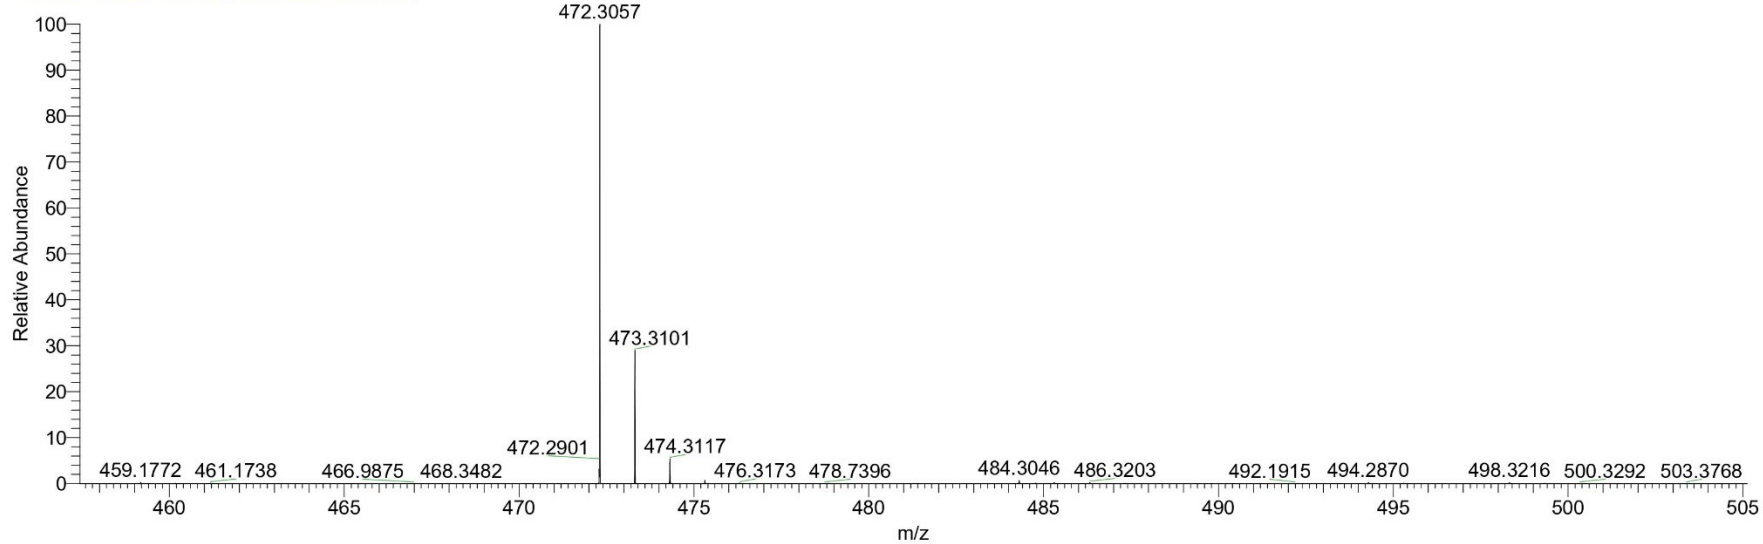



HRMS of compound (4*R*,6*aR*,7*R*,8*R*,9*S*,11*bS*)-methyl 8-((benzyl(methyl)amino)methyl)-7,8,9-trihydroxy-4,11*b*-dimethyltetradecahydro-6*a*,9-methanocyclohepta[*a*]naphthalene-4-carboxylate (**6**)

D:\DATA\...\20210705\SZZS20210705

07/05/21 07:35:29

SZZS20210705 #15551-15731 RT: 49.89-50.47 AV: 91 NL: 9.57E8  
T: FTMS + p ESI Full ms [100.0000-1000.0000]

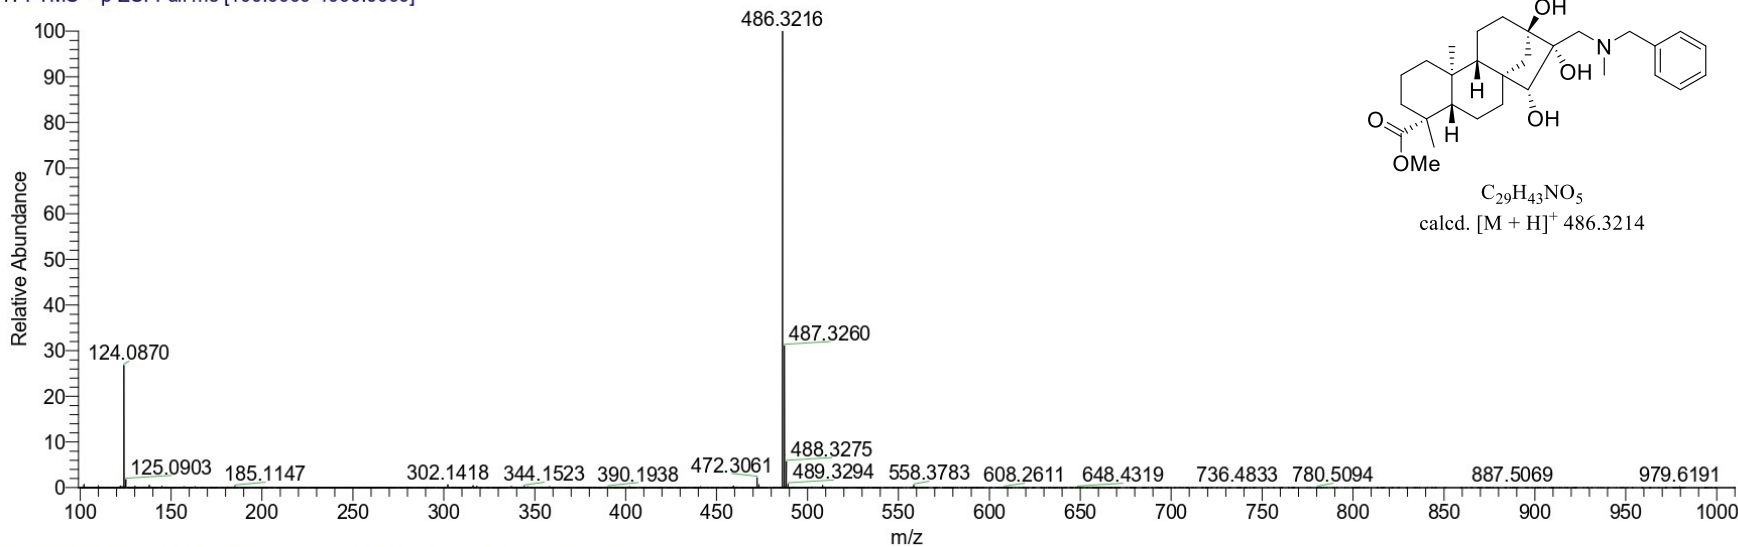

SZZS20210705 #15551-15731 RT: 49.89-50.47 AV: 91 NL: 9.57E8  
T: FTMS + p ESI Full ms [100.0000-1000.0000]

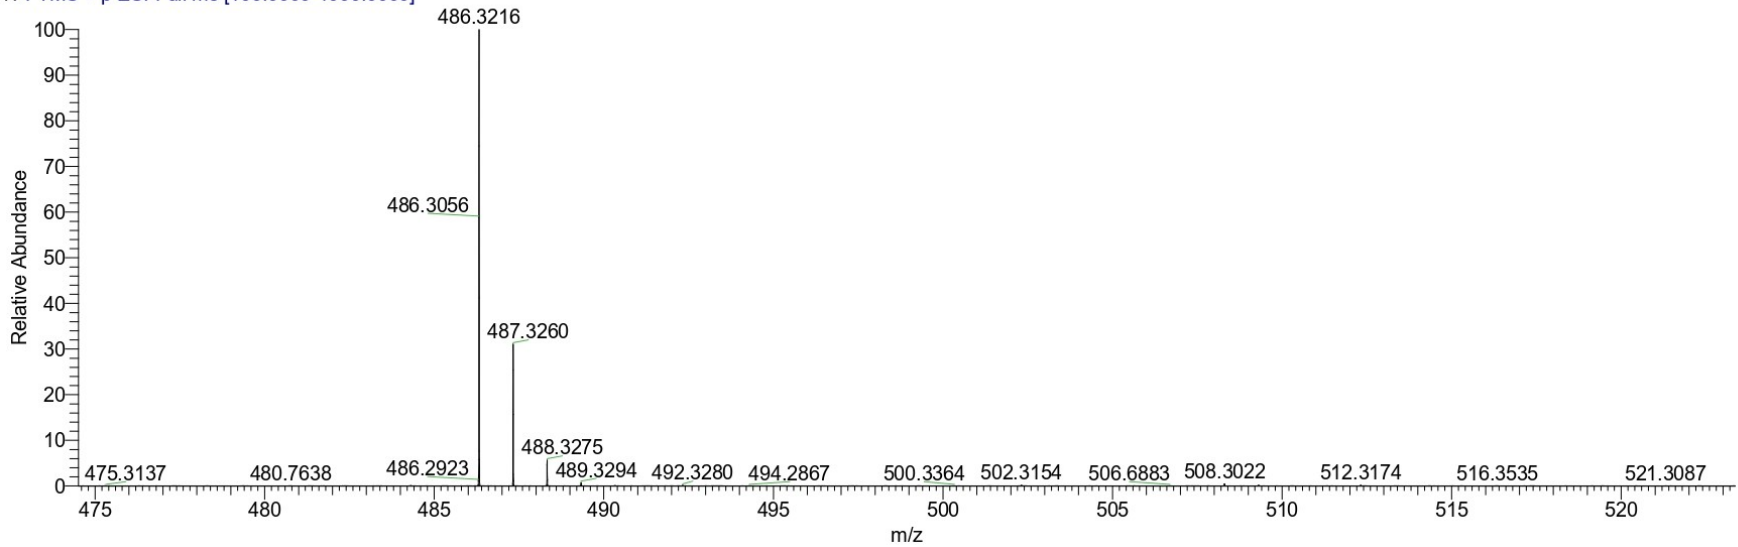

HRMS of compound (4*R*,6*aR*,7*R*,8*R*,9*S*,11*bS*)-methyl 7,8,9-trihydroxy-4,11*b*-dimethyl-8-((((*R*)-1-phenylethyl)amino)methyl)tetradecahydro-6*a*,9-methanocyclohepta[*a*]naphthalene-4-carboxylate (7)

D:\DATA\...\20210705\SZZS20210705

07/05/21 07:35:29

SZZS20210705 #15935-16104 RT: 51.13-51.66 AV: 85 NL: 2.03E9  
T: FTMS + p ESI Full ms [100.0000-1000.0000]

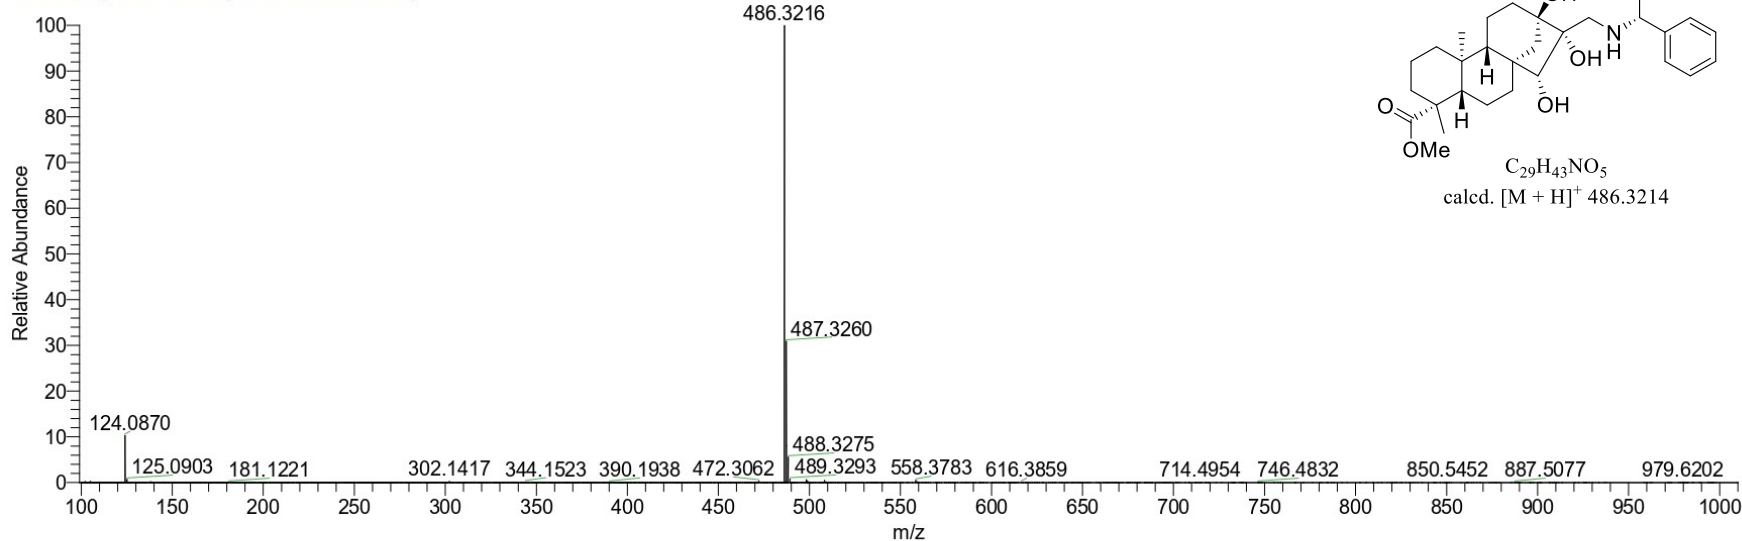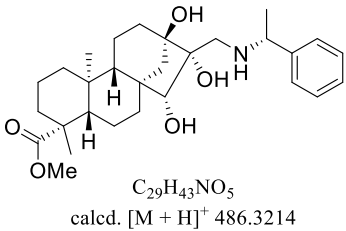

SZZS20210705 #15935-16104 RT: 51.13-51.66 AV: 85 NL: 2.03E9  
T: FTMS + p ESI Full ms [100.0000-1000.0000]

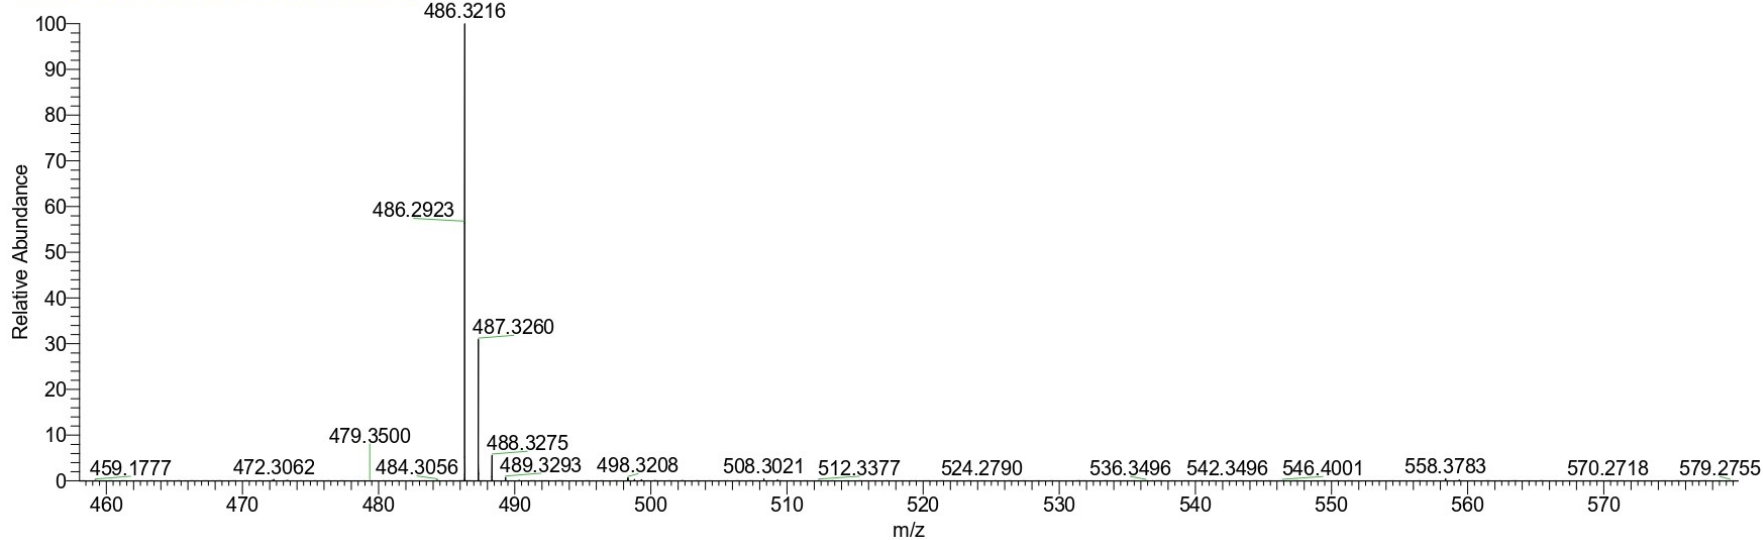

HRMS of compound (4*R*,6*aR*,7*R*,8*R*,9*S*,11*bS*)-methyl 7,8,9-trihydroxy-4,11*b*-dimethyl-8-((((*S*)-1-phenylethyl)amino)methyl)tetradecahydro-6*a*,9-methanocyclohepta[*a*]naphthalene-4-carboxylate (**8**)

D:\DATA\...\20210705\SZZS20210705

07/05/21 07:35:29

SZZS20210705 #16308-16527 RT: 52.32-53.02 AV: 110 NL: 1.18E9  
T: FTMS + p ESI Full ms [100.0000-1000.0000]

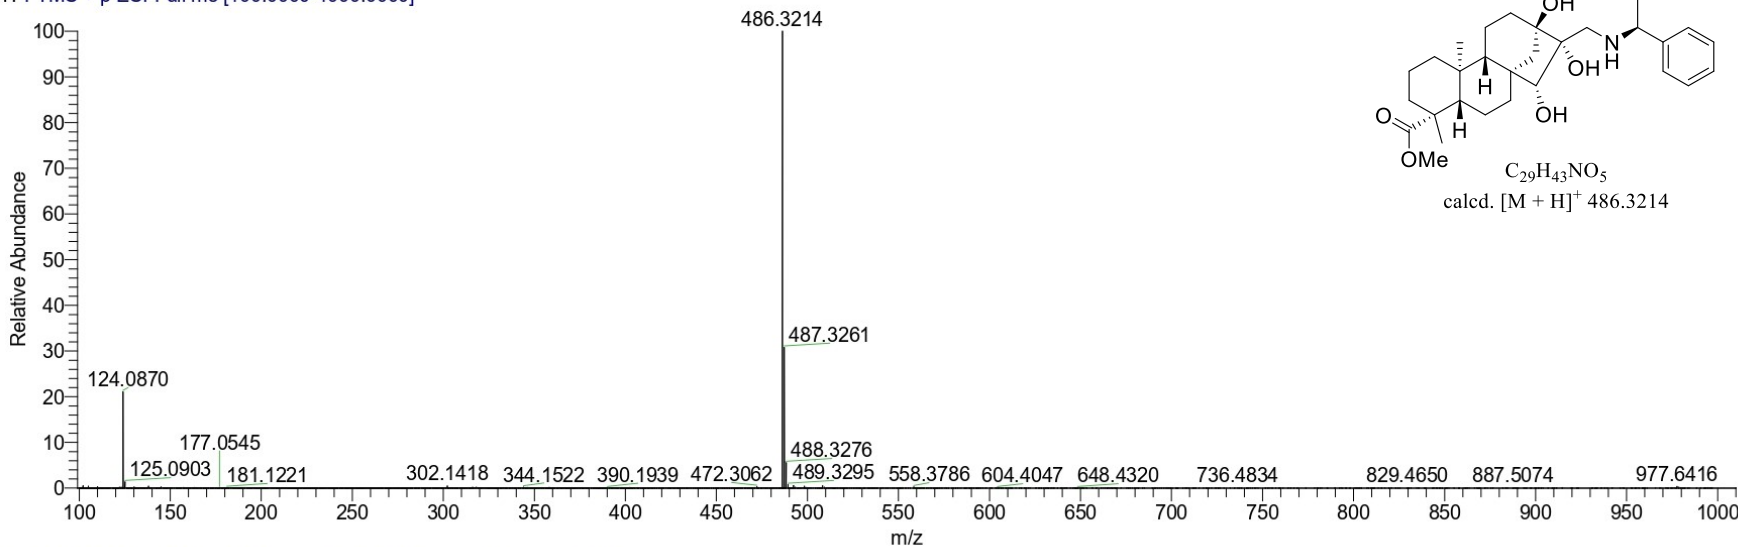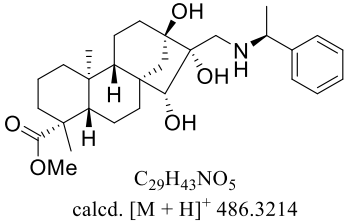

SZZS20210705 #16308-16527 RT: 52.32-53.02 AV: 110 NL: 1.18E9  
T: FTMS + p ESI Full ms [100.0000-1000.0000]

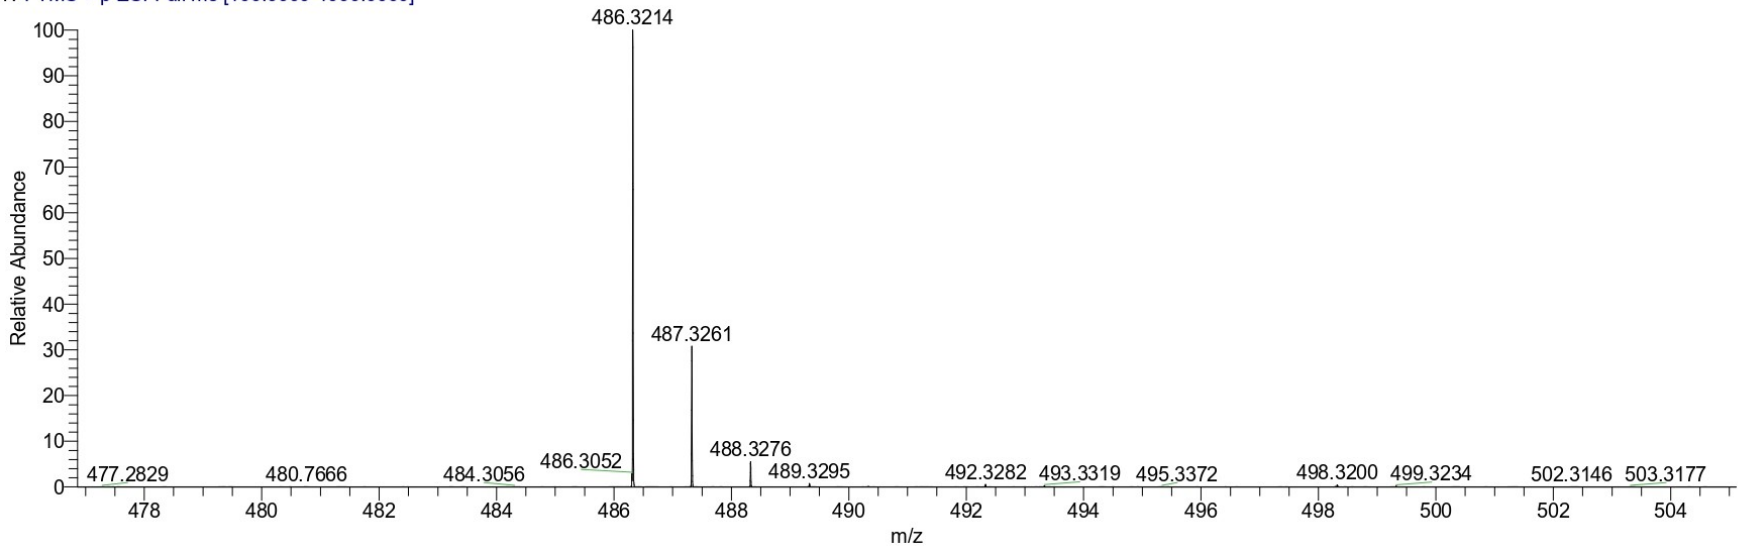

HRMS of compound (4*R*,6*aR*,7*R*,8*R*,9*S*,11*bS*)-methyl 8-(((4-fluorobenzyl)amino)methyl)-7,8,9-trihydroxy-4,11*b*-dimethyltetradecahydro-6*a*,9-methanocyclohepta[*a*]naphthalene-4-carboxylate (**9**)

12/08/21 11:53:26

SZZS-20211208-POS #8756-8763 RT: 47.57-47.60 AV: 8 NL: 1.80E9T:  
FTMS + p ESI Full ms [125.0000-1000.0000]

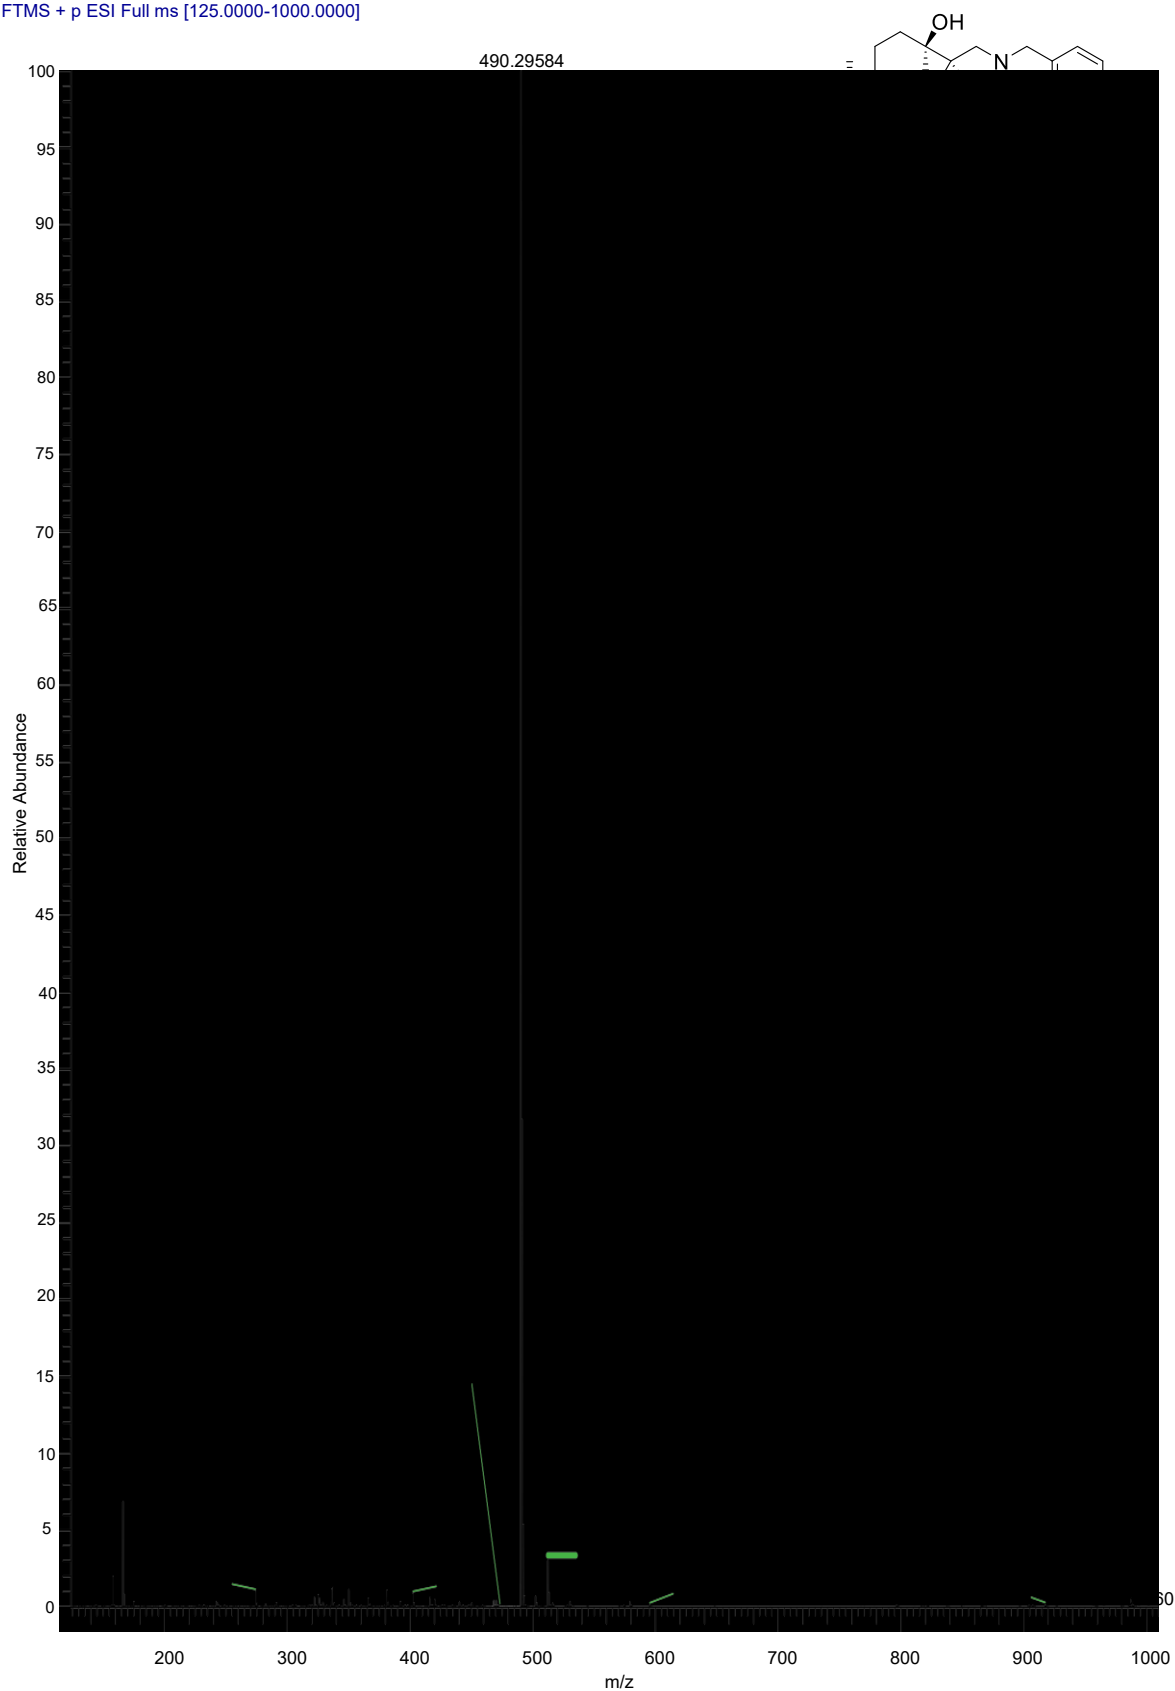

HRMS of compound (4*R*,6*aR*,7*R*,8*R*,9*S*,11*bS*)-methyl 7,8,9-trihydroxy-8-(((4-methoxybenzyl)amino)methyl)-4,11*b*-dimethyltetradecahydro-6*a*,9-methanocyclohepta[*a*]naphthalene-4-carboxylate (**10**)

D:\DATA\...20211208\SZS-20211208-POS

12/08/21 11:53:26

SZS-20211208-POS #8924-8930 RT: 48.48-48.51 AV: 7 NL: 1.48E9T:  
FTMS + p ESI Full ms [125.0000-1000.0000]

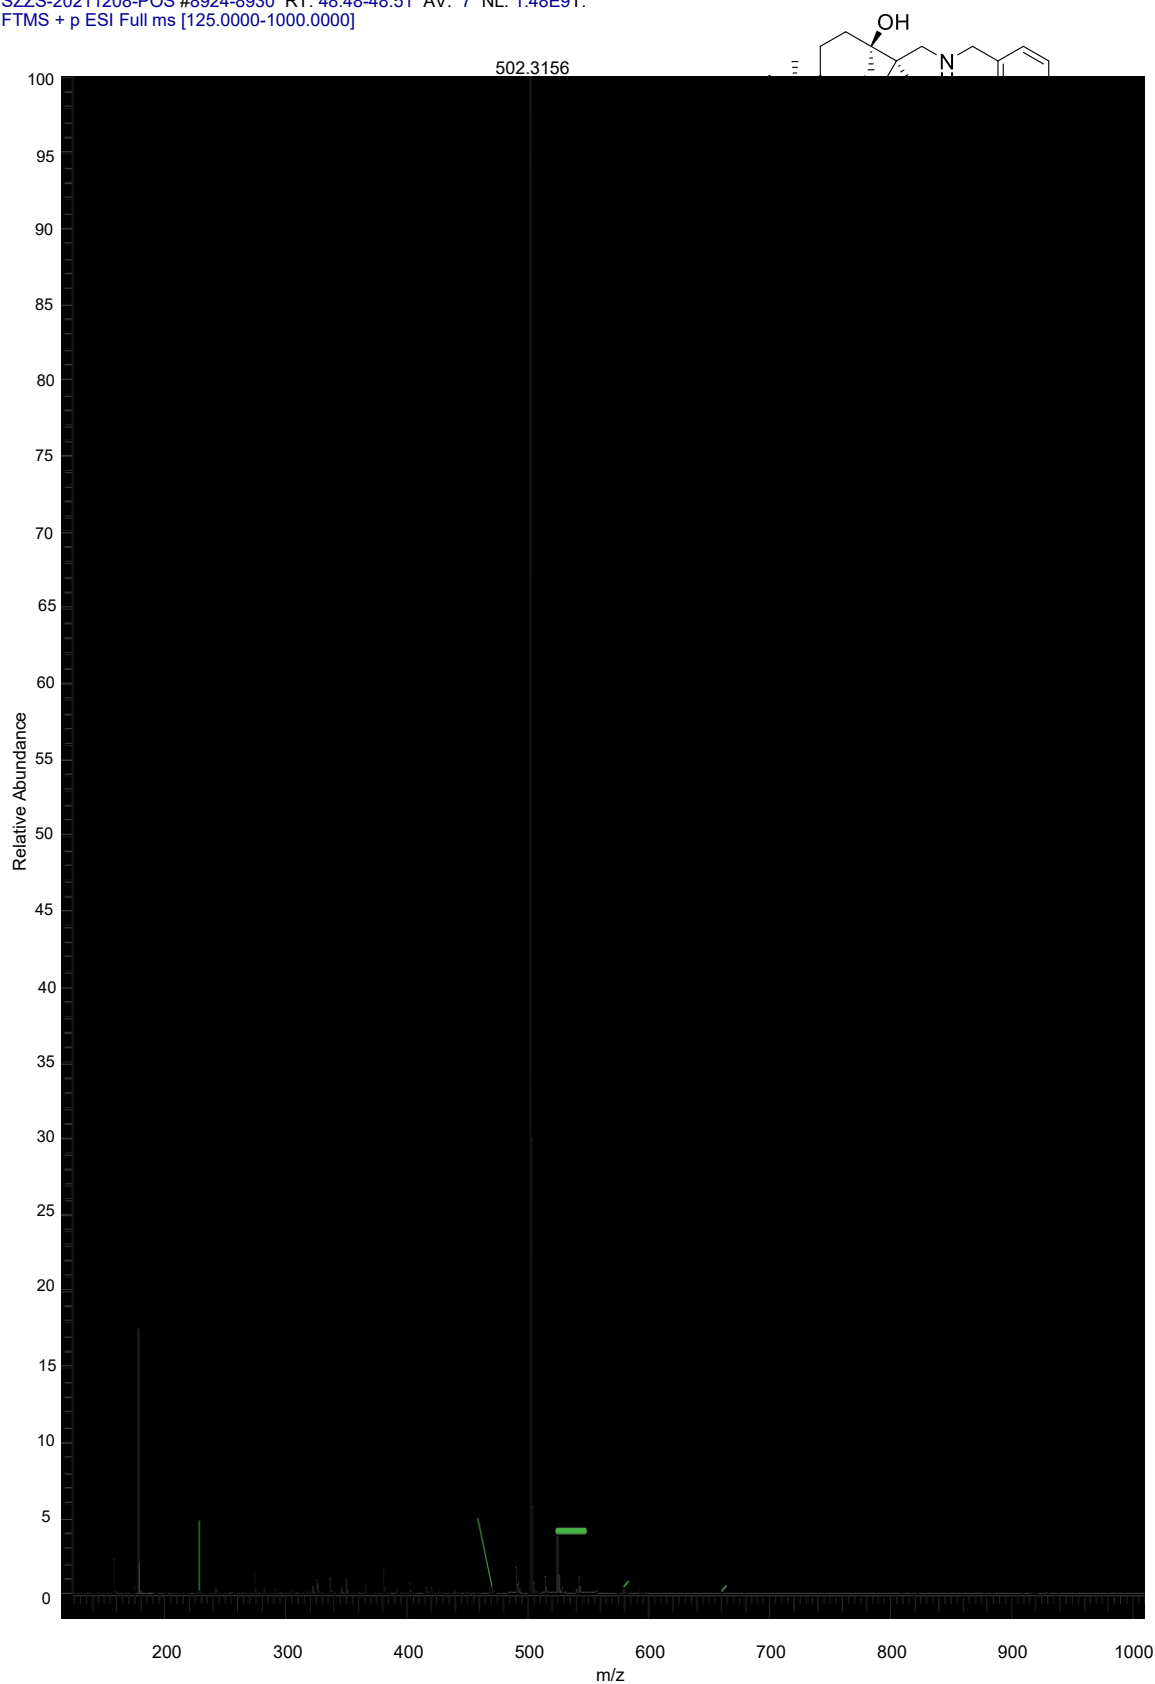

HRMS of compound (4*R*,4*aS*,6*aR*,7*R*,8*R*,11*aS*,11*bS*)-methyl 8-((((*R*)-1-(4-fluorophenyl)ethyl)amino)methyl)-7,8,9-trihydroxy-4,11*b*-dimethyltetradecahydro-6*a*,9-methanocyclohepta[*a*]naphthalene-4-carboxylate (**11**)

D:\DATA\...SZZS\SZZS-20220520-POS 1.75

SZZS-20220520-POS #5450-5474 RT: 29.76-29.88 AV: 25 NL: 1.75E9 T:  
FTMS + p ESI Full ms [125.0000-1000.0000]

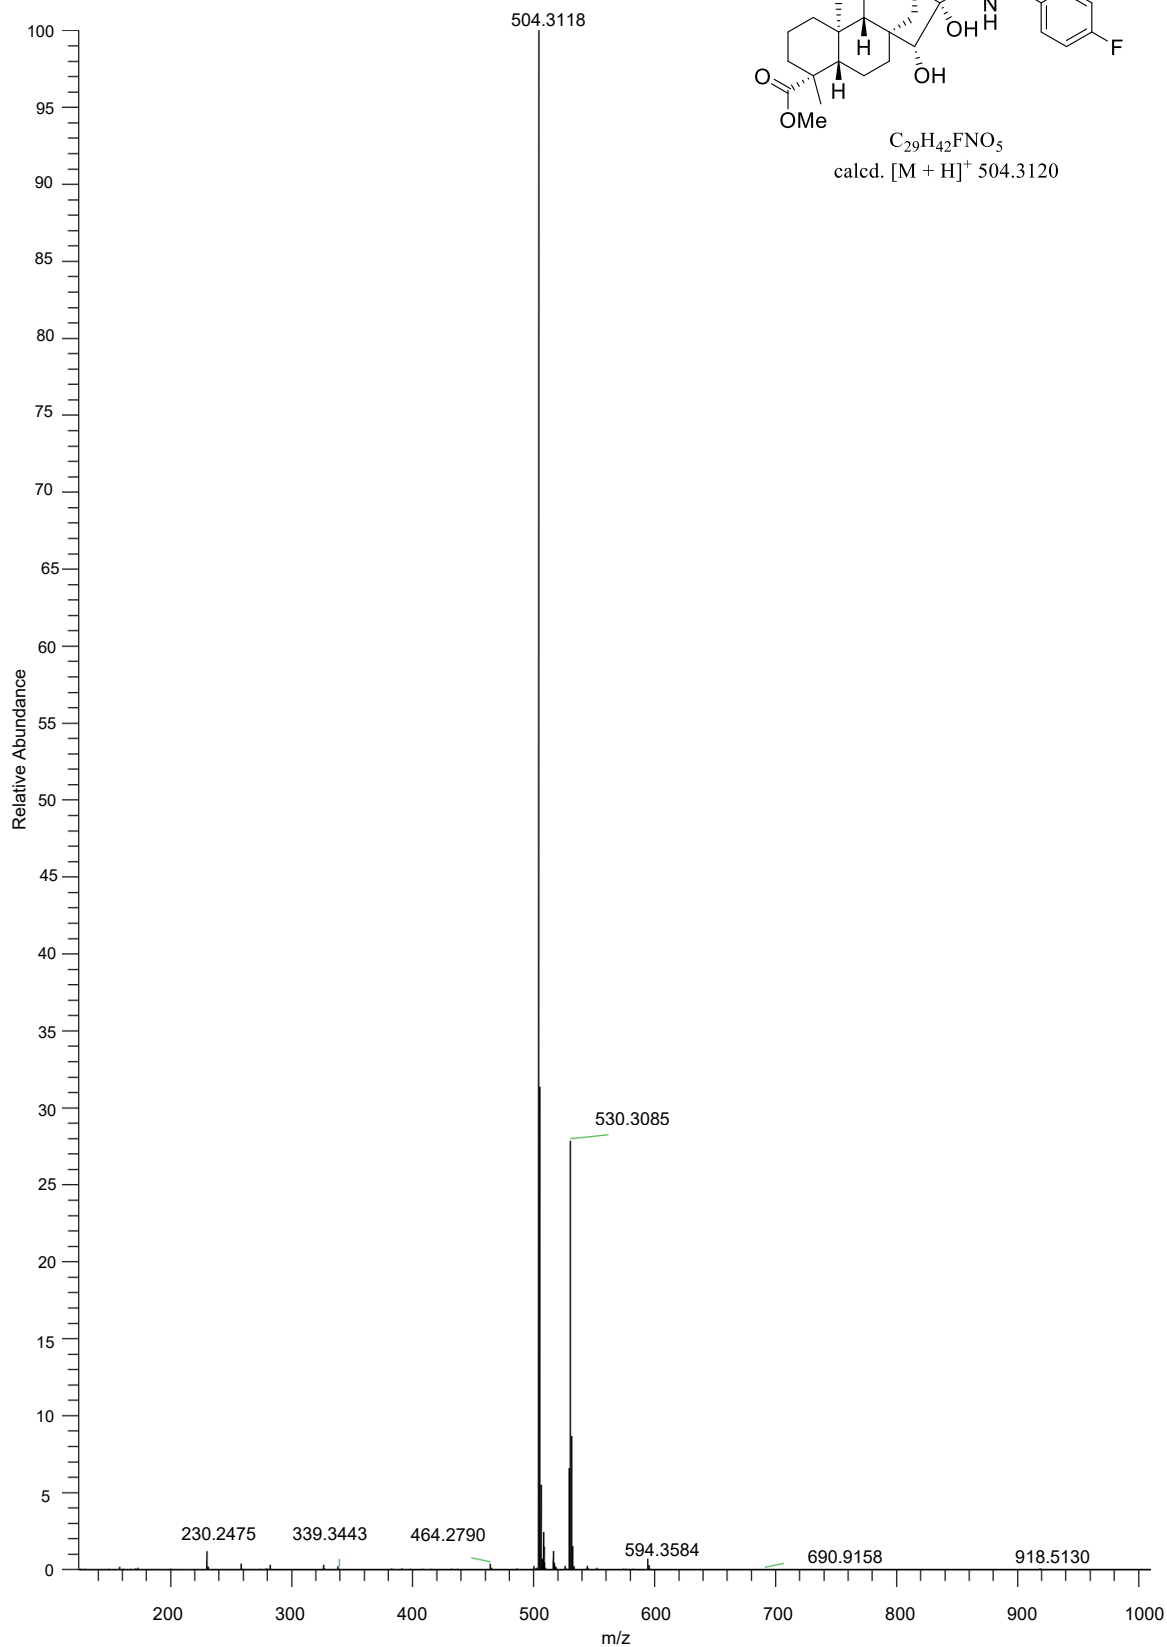

HRMS of compound (4*R*,6*aR*,7*R*,8*R*,9*S*,11*bS*)-methyl 7,8,9-trihydroxy-4,11*b*-dimethyl-8-(((*R*)-1-(naphthalen-2-yl)ethyl)amino)methyl)tetradecahydro-6*a*,9-methanocyclohepta[*a*]naphthalene-4-carboxylate (**12**)

D:\DATA\...\SZSS\SZZS-20220520-POS

SZZS-20220520-POS #7280-7298 RT: 39.88-39.97 AV: 19 NL: 8.02E8 T:

FTMS + p ESI Full ms [125.0000-1000.0000]

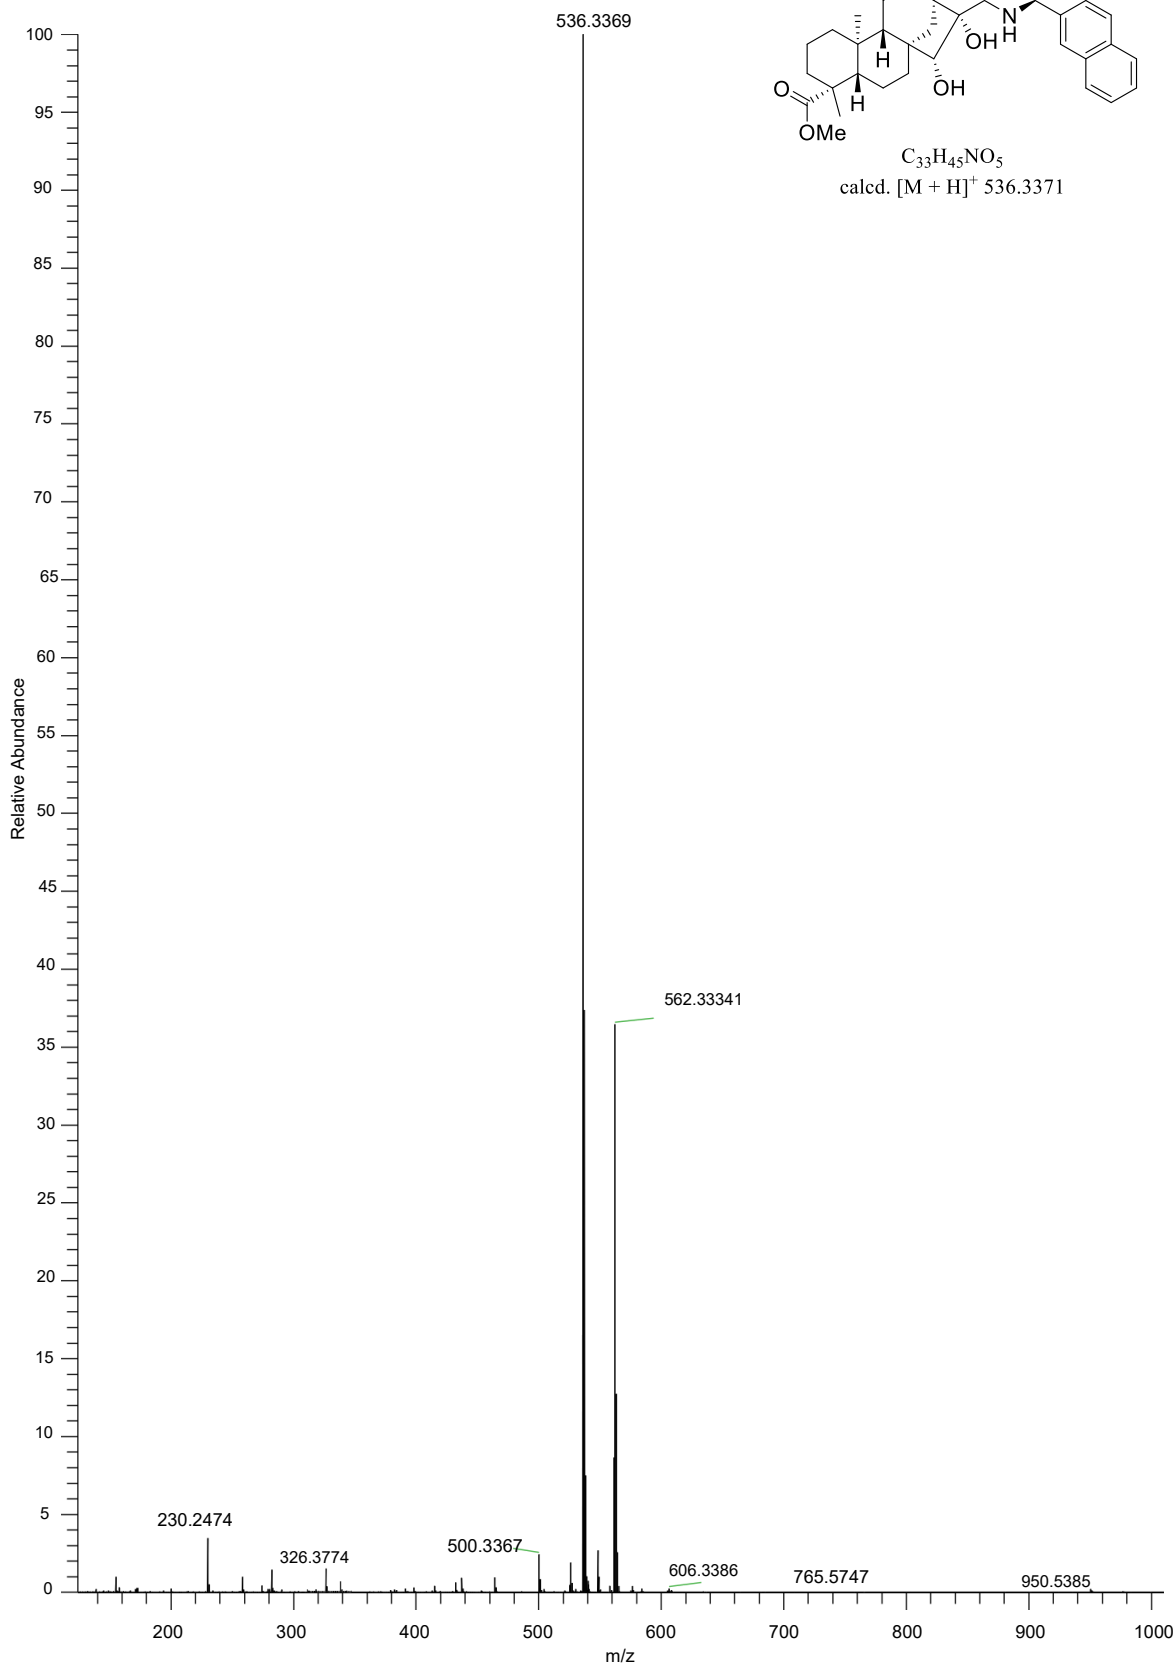

HRMS of compound (4*R*,6*aR*,7*R*,8*R*,9*S*,11*bS*)-methyl 7,8,9-trihydroxy-4,11*b*-dimethyl-8-((((*S*)-1-(naphthalen-2-yl)ethyl)amino)methyl)tetradecahydro-6*a*,9-methanocyclohepta[*a*]naphthalene-4-carboxylate (**13**)

D:\DATA\... \SZZS\SZZS-20220520-POS NL: 1

SZZS-20220520-POS #5752-5775 RT: 31.42-31.54 AV: 24 NL: 1.17E9 T:

FTMS + p ESI Full ms [125.0000-1000.0000]

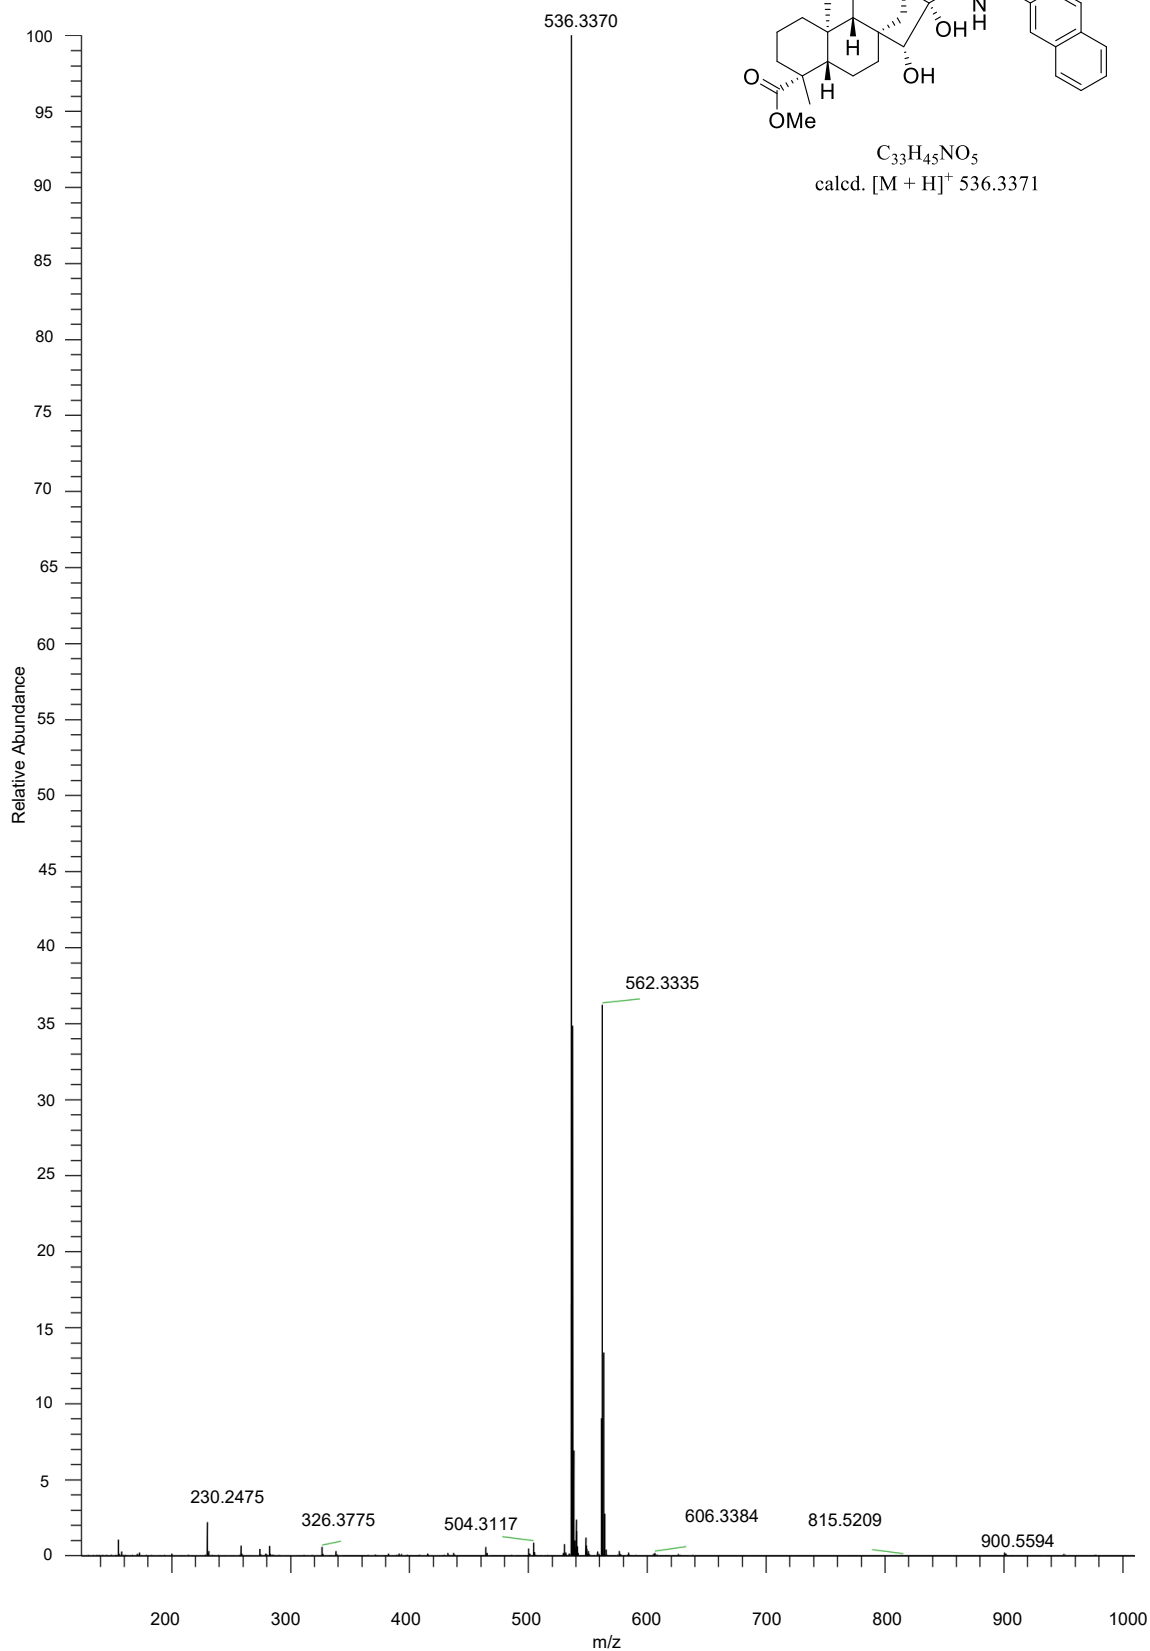



HRMS of compound (4*R*,6*aR*,7*R*,8*R*,9*S*,11*bS*)-methyl 7,8,9-trihydroxy-4,11*b*-dimethyl-8-(((naphthalen-1-ylmethyl)amino)methyl)tetradecahydro-6*a*,9-methanocyclohepta[*a*]naphthalene-4-carboxylate (**14**)

D:\DATA\...ISZS\ISZS-20220 05/20/22 14:38:11

SZS-20220520-POS #5994-6019 RT: 32.75-32.88 AV: 26 NL: 5.42E8 T:

FTMS + p ESI Full ms [125.0000-1000.0000]

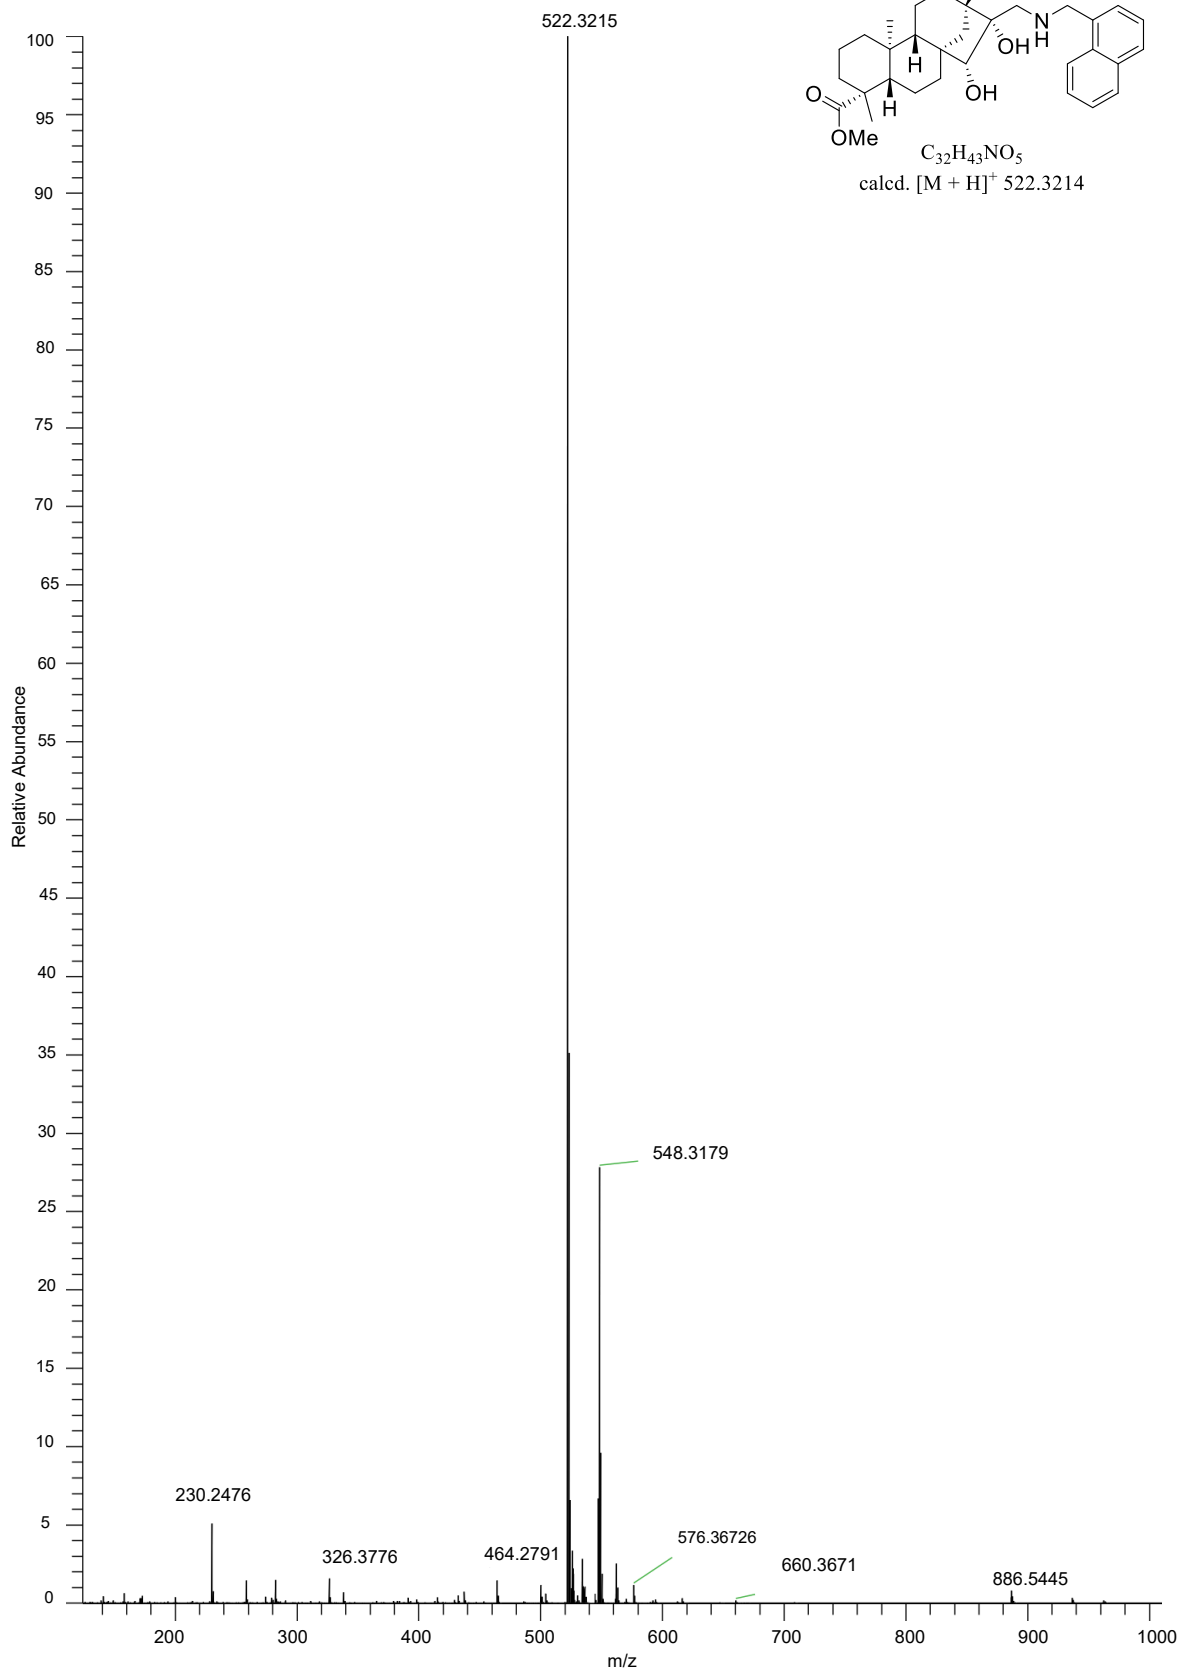

HRMS of compound (4*R*,6*aR*,7*R*,8*R*,9*S*,11*bS*)-methyl 7,8,9-trihydroxy-4,11*b*-dimethyl-8-(((*R*)-1-phenylpropyl)amino)methyl)tetradecahydro-6*a*,9-methanocyclohepta[*a*]naphthalene-4-carboxylate (**15**)

D:\DATA\...SZZS\ISZZS-20220520-POS#709

SZZS-20220520-POS #7096-7112 RT: 38.88-38.96 AV: 17 NL: 2.41E9 T:

FTMS + p ESI Full ms [125.0000-1000.0000]

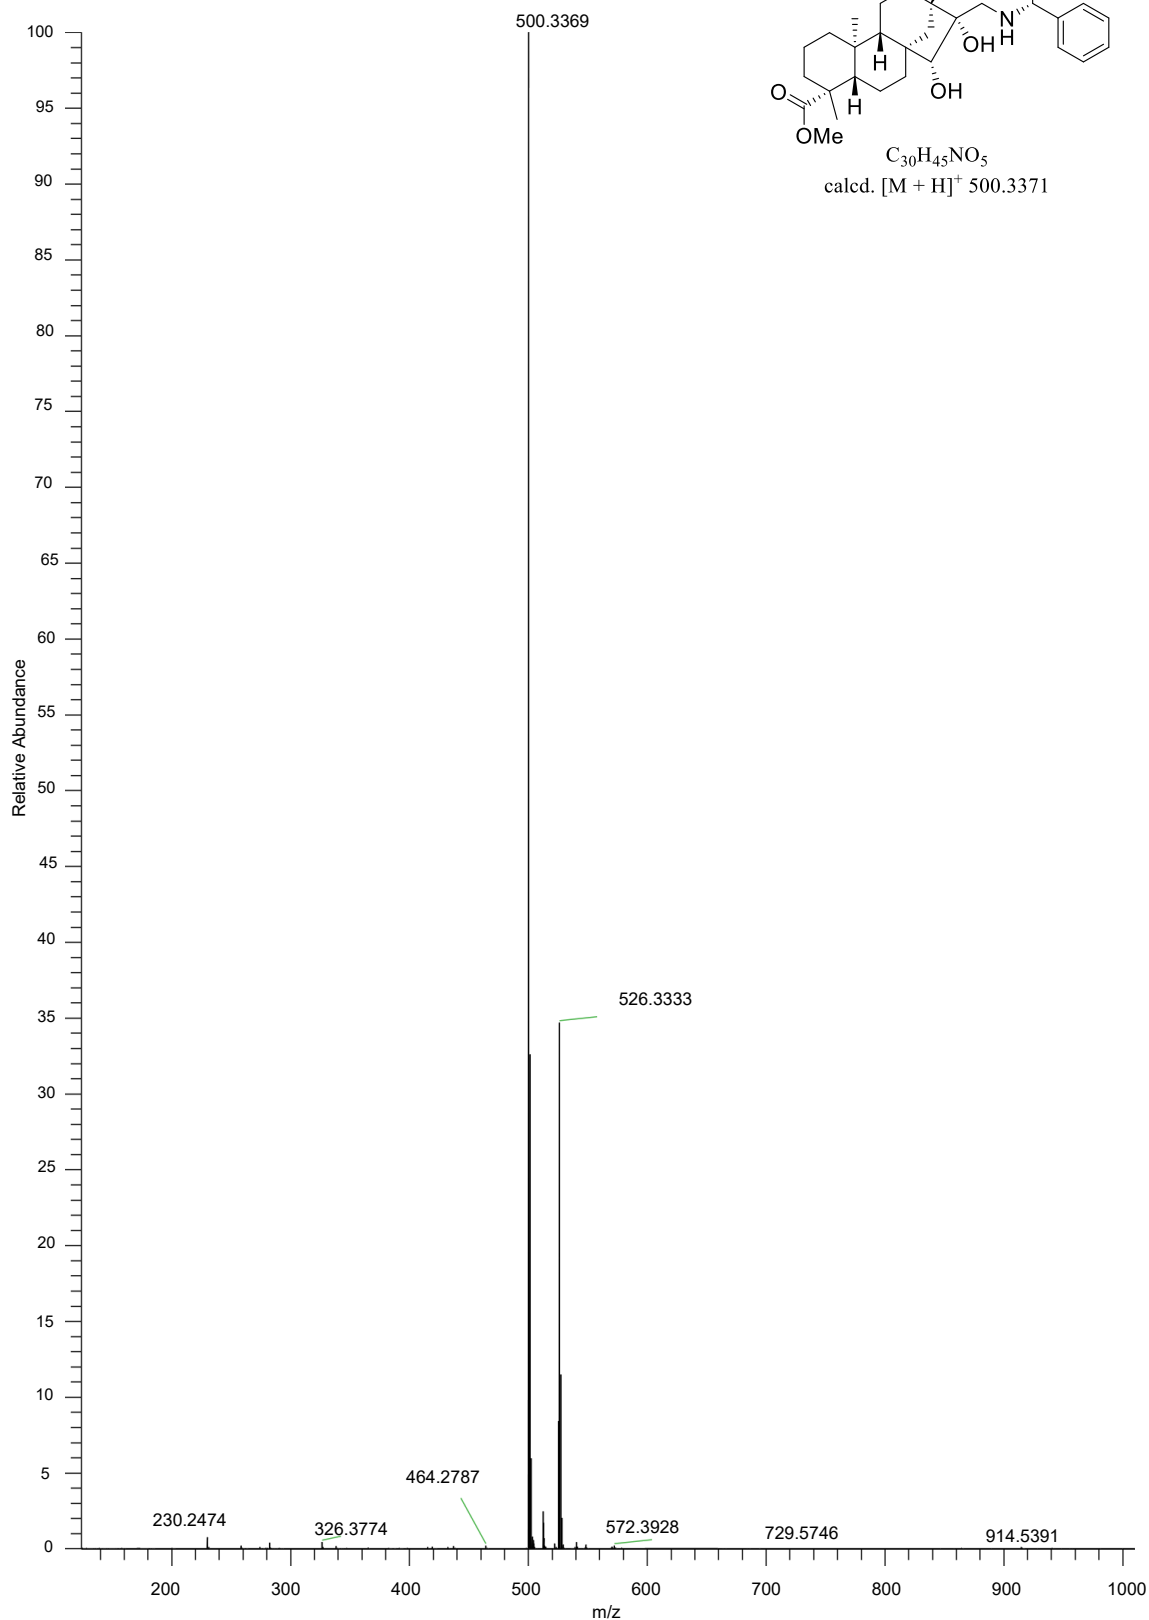

HRMS of compound (4*R*,6*aR*,7*R*,8*R*,9*S*,11*bS*)-methyl 7,8,9-trihydroxy-4,11*b*-dimethyl-8-(((*S*)-1-phenylpropyl)amino)methyl)tetradecahydro-6*a*,9-methanocyclohepta[*a*]naphthalene-4-carboxylate (**16**)

D:\DATA\...SZZS\SZZS-20220 05/20/22 14:38:11

SZZS-20220520-POS #6775-6789 RT: 37.10-37.17 AV: 15 NL: 1.04E9 T:

FTMS + p ESI Full ms [125.0000-1000.0000]

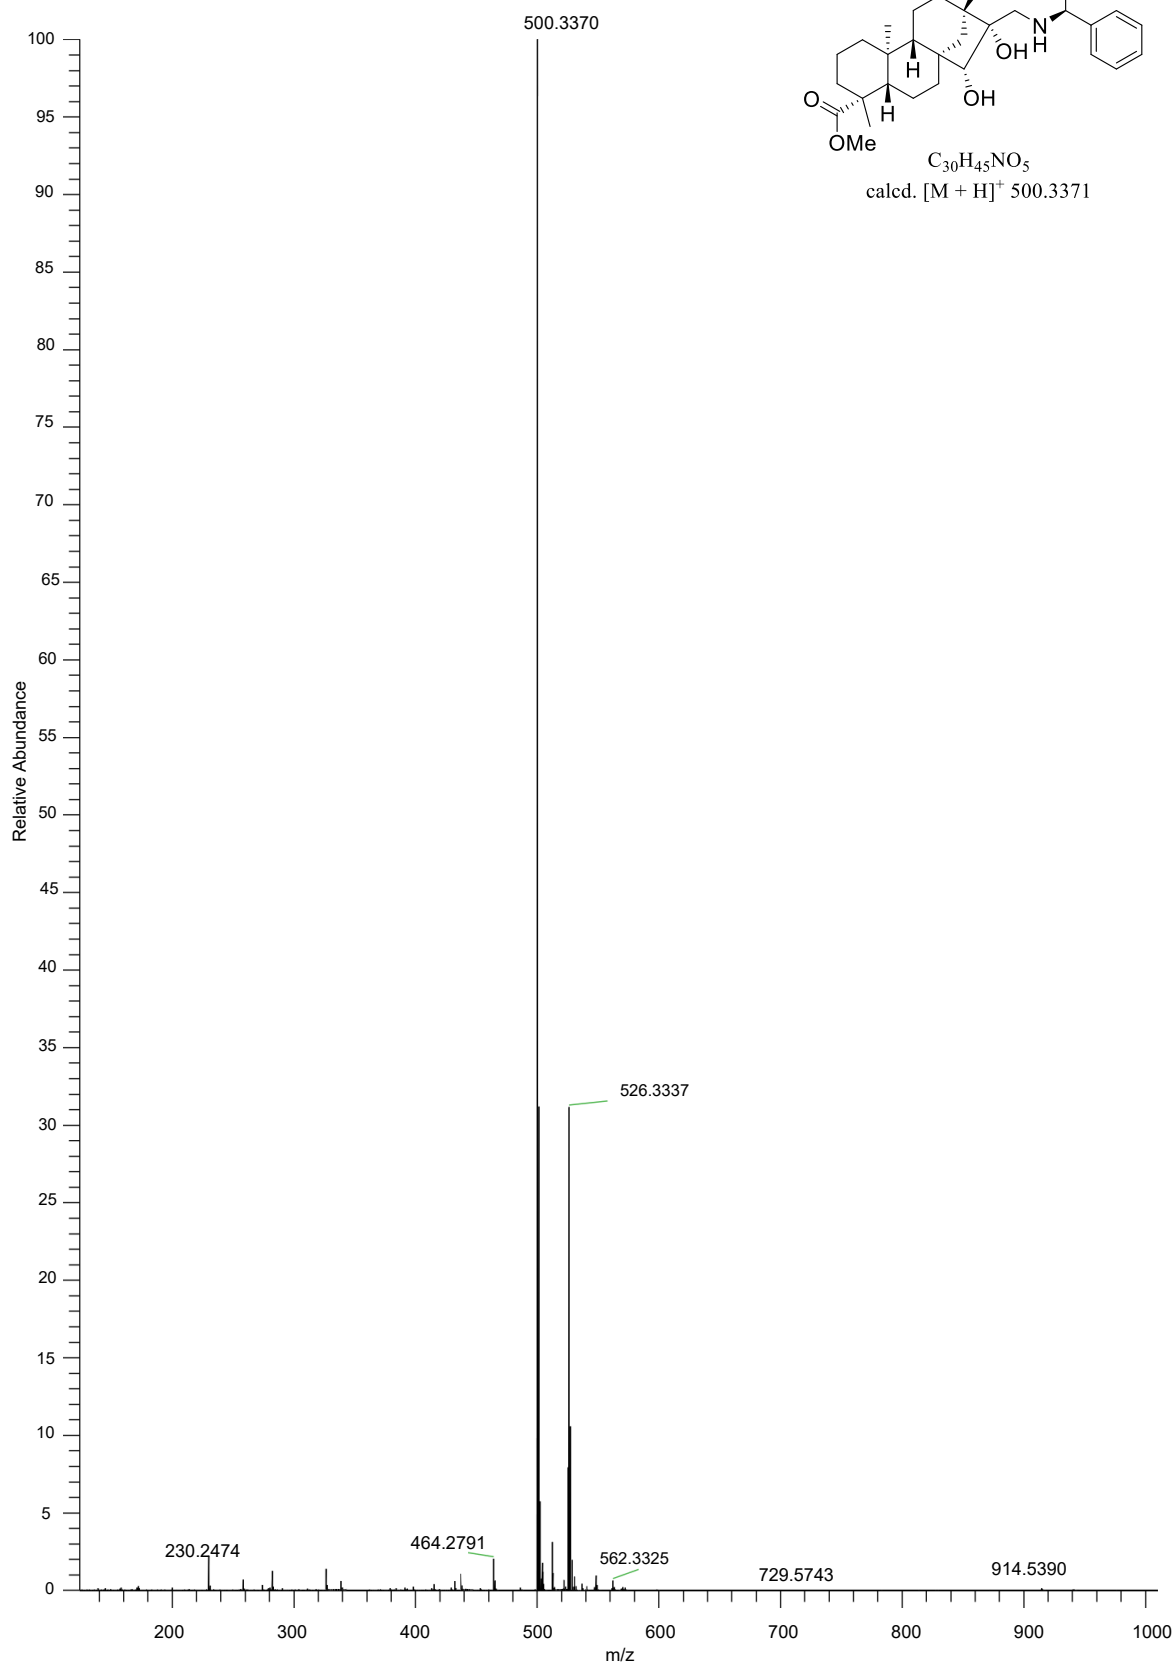

HRMS of compound (4*R*,6*aR*,7*R*,8*R*,9*S*,11*bS*)-methyl 8-(aminomethyl)-7,8,9-trihydroxy-4,11*b*-dimethyltetradecahydro-6*a*,9-methanocyclohepta[*a*]naphthalene-4-carboxylate (**17**)

D:\DATA\...SZS\SZS-20220 05/20/22 14:38:11

SZS-20220520-POS #7416-7434 RT: 40.63-40.72 AV: 19 NL: 6.85E8 T:  
FTMS + p ESI Full ms [125.0000-1000.0000]

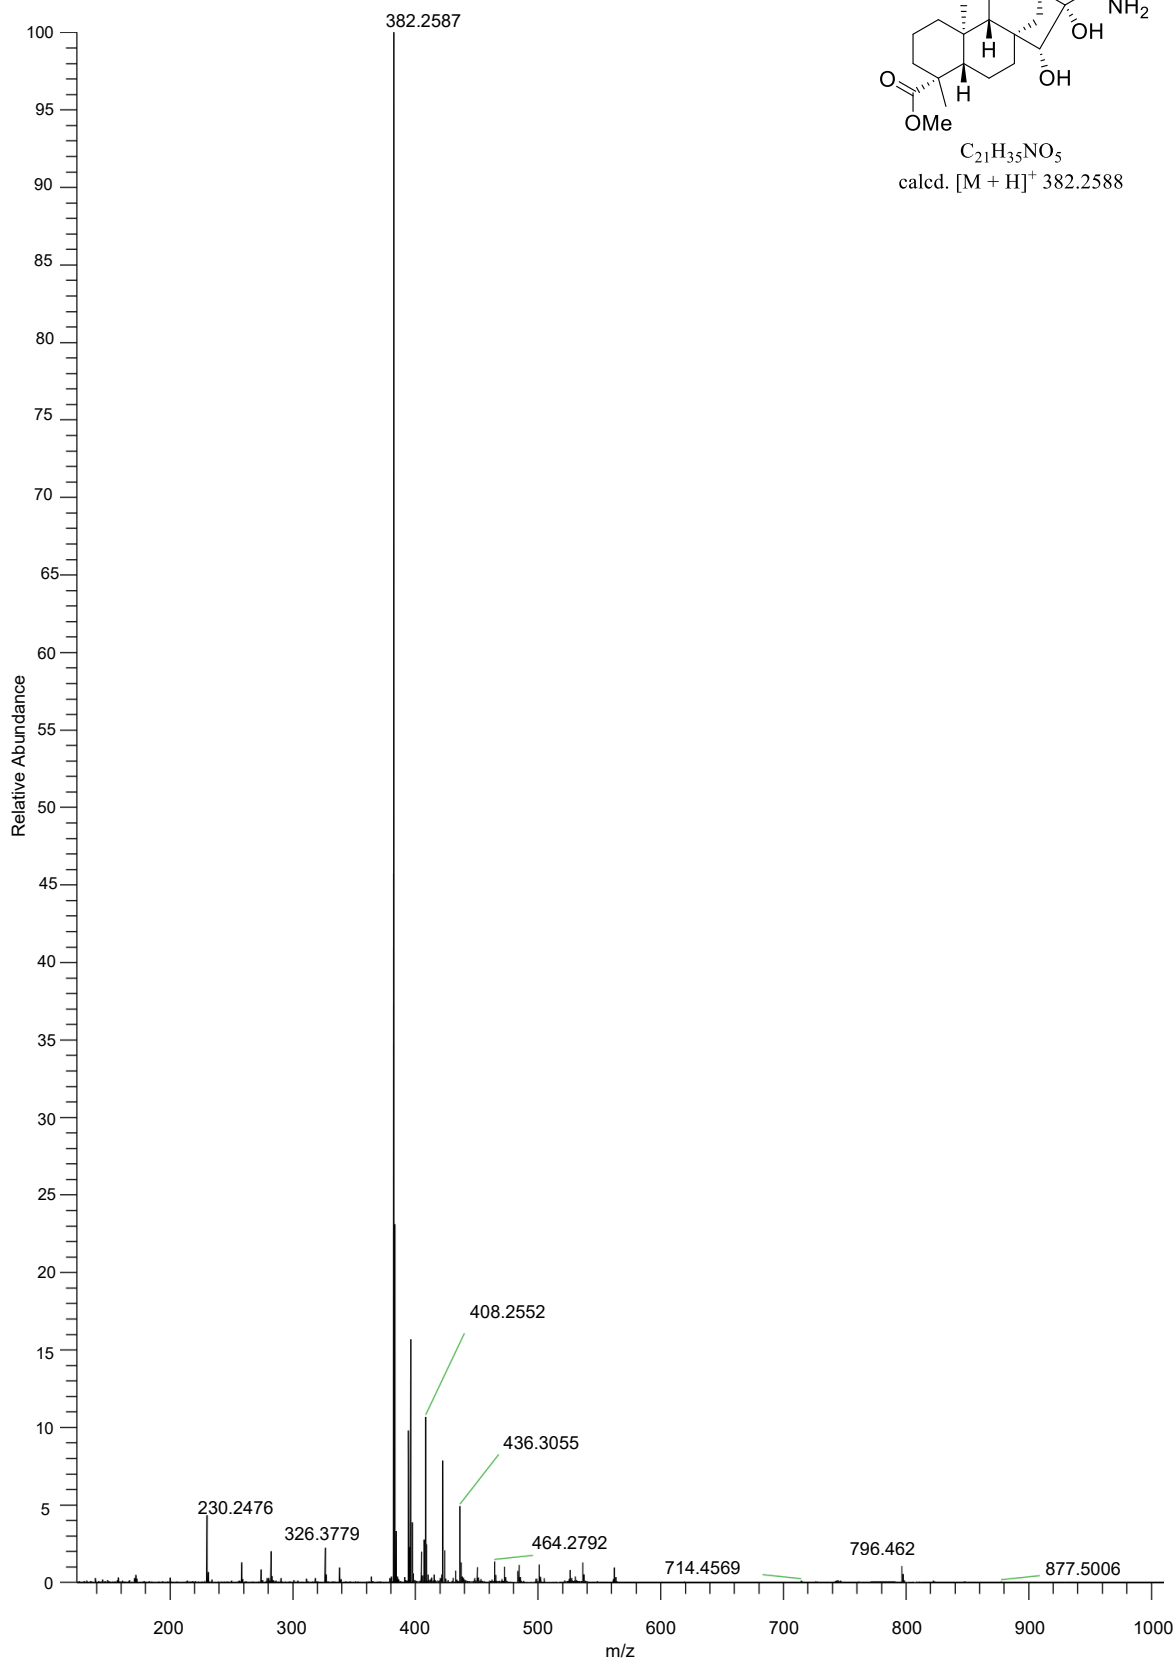

HRMS of compound (4*R*,5'*R*,6*aR*,7*R*,9*S*,11*bS*)-methyl 3'-benzyl-7,9-dihydroxy-4,11*b*-dimethyldodecahydro-1*H*-spiro[6*a*,9-methanocyclohepta[*a*]naphthalene-8,5'-oxazolidine]-4-carboxylate (**18**)

D:\DATA\...\SZSS\SZSS-20220 05/20/22 14:38:11

SZSS-20220520-POS #7523-7541 RT: 41.22-41.31 AV: 19 NL: 3.28E8 T:  
FTMS + p ESI Full ms [125.0000-1000.0000]

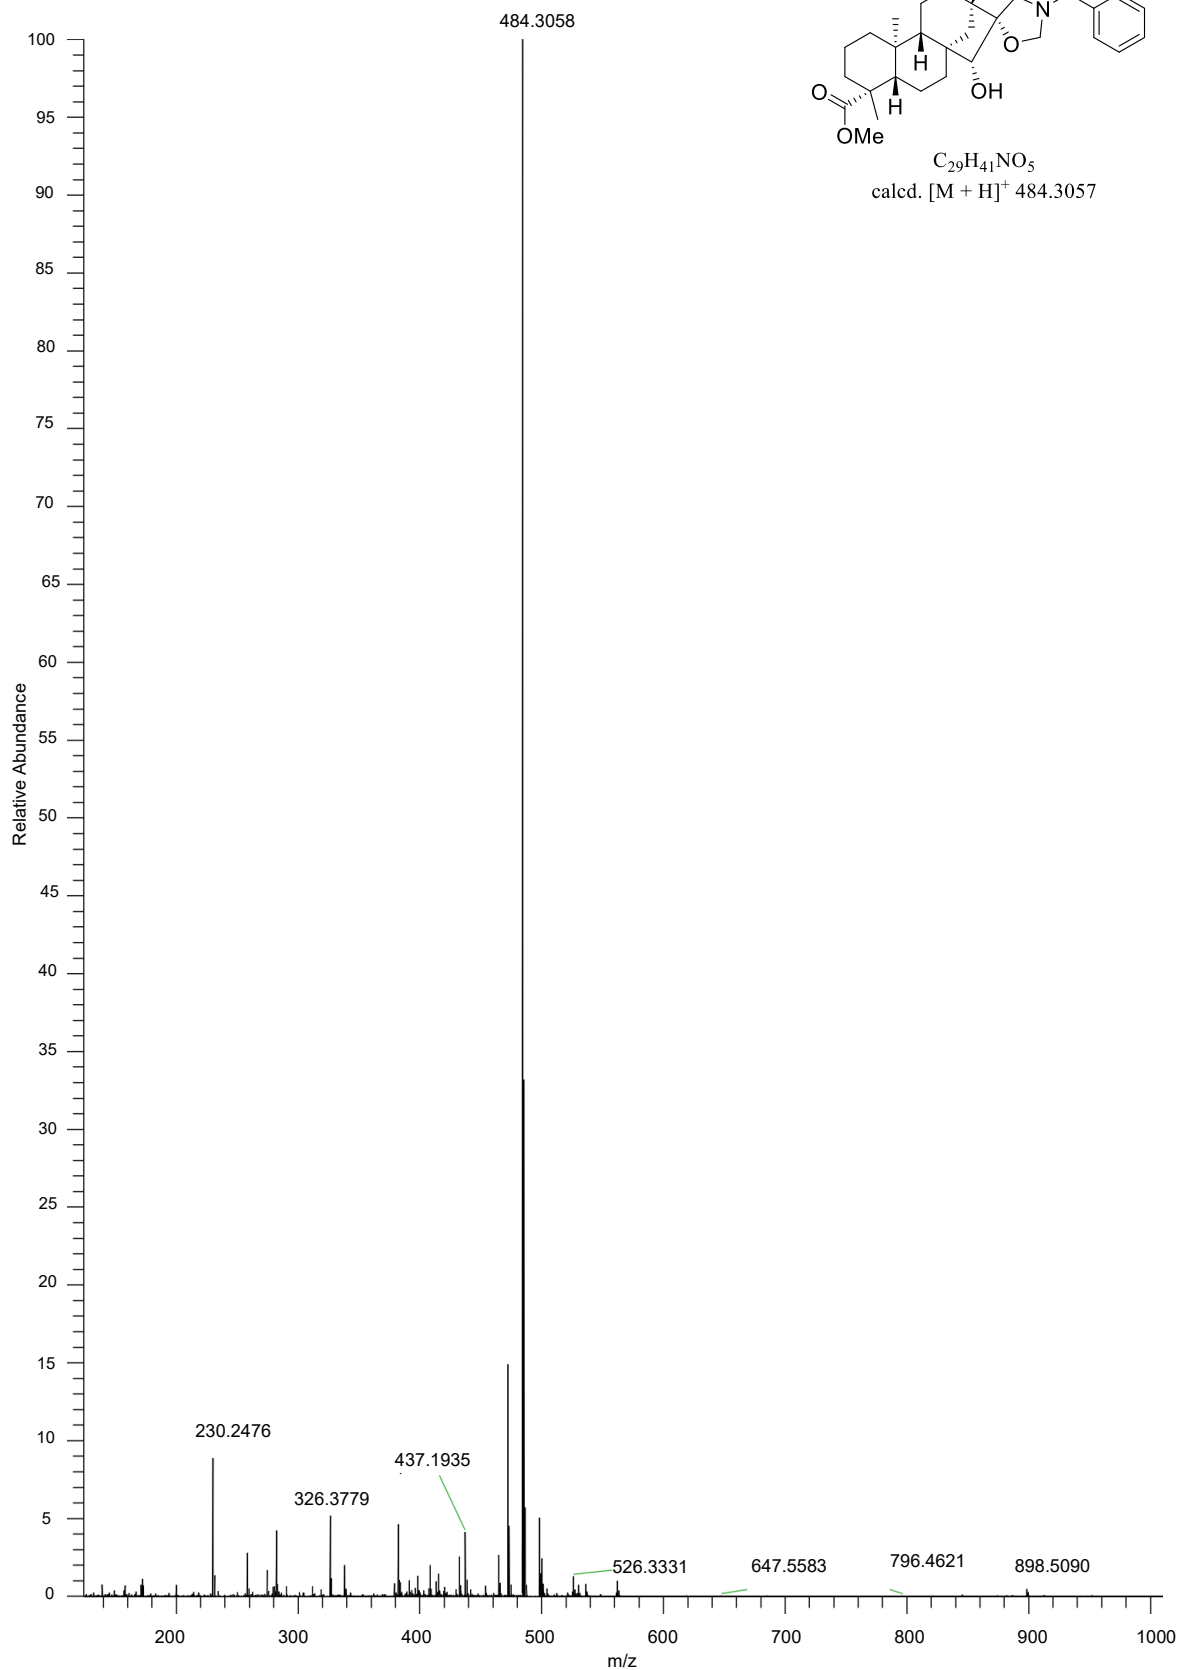

Supplement: s1 [file s1]
